# Supplementary material for: The Endophytic Mycobiome of European Ash and Sycamore Maple Leaves – Geographic Patterns, Host Specificity and Influence of Ash Dieback
Source: Front Microbiol. 2018 Oct 24;9:2345. doi: 10.3389/fmicb.2018.02345 (PMC6207852; doi:10.3389/fmicb.2018.02345)
Supplement: Supplementary file 2 [file Table_2.xlsx]

## Sheet: info
	Supplementary Table File 2: Fungal pond sediment OTUs with mismatches
	The OTUs in the 'mismatches' worksheet were classified as fungi by the automatic classification algorithm
	and have mismatches within the last 6 bp of the ITS4f/ITS4f2 primers.
	In reality, only mismatches within the last two positions were found.
	The read counts were calculated as the sum of rarefied read counts from 3 samples.
	The classification was reviewed manually based on a BLAST search against the NCBI nt database
	and misassigned OTUs were corrected. No OTU of clear fungal origin could be found,
	although there were a few uncertain cases.
	The BLAST columns show the e-value and query coverage of the best hit from a
	BLAST search against the taxonomic reference database.
	color codes:
	Viridiplantae
	Metazoa
	manually corrected according to BLAST against NCBI nt
	uncertain, probably not fungal (according to BLAST)

## Sheet: mismatches
# of mismatches									Rarefied read counts			Mismatches		BLAST
	OTU	kingdom	phylum	class	order	family	genus	species	ITS4	ITS4f	ITS4f2	ITS4f	ITS4f2	e value	query coverage
2	2314	Viridiplantae	Streptophyta	Bryopsida	Hypnales	Amblystegiaceae	Cratoneuron	Cratoneuron filicinum	24.5767	0	0	1:A/G, 2:C/T	1:A/G	1e-101	0.97491
2	1648	Viridiplantae	Streptophyta	Bryopsida	Hypnales	Brachytheciaceae	Oxyrrhynchium	Oxyrrhynchium sp.	43.2215	0	0.659059	1:A/G, 2:C/T	1:A/G	2e-124	1
2	4717	Viridiplantae	Streptophyta	Bryopsida	Hypnales	Brachytheciaceae	Oxyrrhynchium	Oxyrrhynchium sp.	7.20583	0	0	1:A/G, 2:C/T	1:A/G	9e-128	1
2	5844	Viridiplantae	Streptophyta	fabids_no_rank	Fagales	Fagaceae	Quercus	Quercus sp.	10.6502	0	0	1:A/G, 2:C/T	1:A/G	1e-90	1
2	2768	Viridiplantae	Streptophyta	fabids_no_rank	Malpighiales	Salicaceae	Salix	Salix sp.	15.7248	0	0	1:A/G, 2:C/T	1:A/G	5e-104	0.995238
2	917	Viridiplantae	Streptophyta	fabids_no_rank	Malpighiales	Salicaceae	Salix	Salix sp.	89.7958	0	0.598016	1:A/G, 2:C/T	1:A/G	1e-105	0.995238
2	14	Viridiplantae	Streptophyta	lamiids_no_rank	Lamiales	Oleaceae	Fraxinus	Fraxinus_excelsior	69.525	8.38886	2.94147	1:A/G, 2:C/T	1:A/G	2e-107	1
2	2214	Viridiplantae	Streptophyta	lamiids_no_rank	Lamiales	Oleaceae	Fraxinus	Fraxinus_excelsior	12.722	0	0.659059	1:A/G, 2:C/T	1:A/G	7e-103	1
2	1306	Viridiplantae	Streptophyta	malvids_no_rank	Sapindales	Sapindaceae	Acer	Acer_pseudoplatanus	71.3043	0	0.659059	1:A/G, 2:C/T	1:A/G	3e-87	0.832618
2	160	Viridiplantae	Streptophyta	malvids_no_rank	Sapindales	Sapindaceae	Acer	Acer_pseudoplatanus	2.50989	0	0.659059	1:A/G, 2:C/T	1:A/G	1e-121	1
2	70	Viridiplantae	Streptophyta	malvids_no_rank	Sapindales	Sapindaceae	Acer	Acer_pseudoplatanus	27.0227	0.798608	1.25707	1:A/G, 2:C/T	1:A/G	1e-121	1
2	17	Viridiplantae	Streptophyta	fabids_no_rank	Malpighiales	Salicaceae	Salix	Salix alba	7865.21	0	10.8502	1:A/G, 2:C/T	1:A/G	2e-98	1
2	2457	Viridiplantae	Streptophyta	fabids_no_rank	Malpighiales	Salicaceae	Salix	Salix sp.	14.8542	0	0	1:A/G, 2:C/T	1:A/G	2e-102	0.995238
2	6564	Viridiplantae	Streptophyta	fabids_no_rank	Fagales	Fagaceae	Quercus	Quercus sp.	13.1074	0	0	1:A/G, 2:C/T	1:A/G	1e-90	1
1	6674	Viridiplantae	Streptophyta	fabids_no_rank	Fabales	Fabaceae	Phyllodium	Phyllodium_pulchellum	2.11772	0	1.19603	2:C/T		7e-21	0.547619
1	112	Viridiplantae	Streptophyta	fabids_no_rank	Rosales	Rosaceae	Prunus	Prunus clone	858.364	3.46373	270.35	2:C/T		1e-94	0.995169
1	125	Viridiplantae	Streptophyta	fabids_no_rank	Rosales	Rosaceae	Prunus	Prunus clone	821.273	1.79861	267.507	2:C/T		2e-93	1
1	1262	Viridiplantae	Streptophyta	fabids_no_rank	Rosales	Rosaceae	Prunus	Prunus clone	39.8007	0	14.6825	2:C/T		4e-95	1
1	178	Viridiplantae	Streptophyta	fabids_no_rank	Rosales	Rosaceae	Prunus	Prunus clone	577.153	1	197.487	2:C/T		9e-97	1
1	3030	Viridiplantae	Streptophyta	fabids_no_rank	Rosales	Rosaceae	Prunus	Prunus clone	7.23494	0	3.2221	2:C/T		2e-93	1
1	350	Viridiplantae	Streptophyta	fabids_no_rank	Rosales	Rosaceae	Prunus	Prunus clone	234.376	0	87.6069	2:C/T		2e-93	1
1	393	Viridiplantae	Streptophyta	fabids_no_rank	Rosales	Rosaceae	Prunus	Prunus clone	200.652	0	64.3194	2:C/T		9e-97	1
1	508	Viridiplantae	Streptophyta	fabids_no_rank	Rosales	Rosaceae	Prunus	Prunus clone	135.887	1.59722	62.3055	2:C/T		9e-97	1
1	71	Viridiplantae	Streptophyta	fabids_no_rank	Rosales	Rosaceae	Prunus	Prunus clone	1511.26	2.66512	437.996	2:C/T		7e-93	0.995169
1	212	Viridiplantae	Streptophyta	fabids_no_rank	Rosales	Rosaceae	Prunus	Prunus sp.	399.086	0	146.936	2:C/T		9e-92	1
1	300	Viridiplantae	Streptophyta	fabids_no_rank	Rosales	Rosaceae	Prunus	Prunus sp.	315.131	0.888373	93.3426	2:C/T		7e-93	1.00485
1	5000	Viridiplantae	Streptophyta	fabids_no_rank	Rosales	Rosaceae	Prunus	Prunus sp.	5.12059	0	0	2:C/T		7e-88	1.00485
1	5218	Viridiplantae	Streptophyta	fabids_no_rank	Rosales	Rosaceae	Prunus	Prunus sp.	3.40178	0	0	2:C/T		4e-90	1
1	636	Viridiplantae	Streptophyta	fabids_no_rank	Rosales	Rosaceae	Prunus	Prunus sp.	102.461	0	31.8793	2:C/T		2e-93	1
1	6982	Viridiplantae	Streptophyta	fabids_no_rank	Rosales	Rosaceae	Prunus	Prunus avium	10.1315	0	1.84294	2:C/T		2e-93	0.995146
1	6396	Fungi/Metazoa?							11.4054	0	4.47917	2:C/T		5e-60	0.965517
1	6798	Fungi/Metazoa?							12.3399	0	3.17321	2:C/T		7e-59	0.91954
1	5495	Fungi?						Eukaryote/Fungal sp.	5.51168	0	4.35709	2:C/T		1e-17	0.399281
1	945	Ichthyosporea/Fungi?							31.3937	0	51.8097	2:C/T		3e-51	0.79397
1	1633	Ichthyosporea/Fungi?							11.9029	0	14.8777	2:C/T		3e-51	0.869347
1	3733	Ichthyosporea/Fungi?							2.10317	0	3.60052	2:C/T		1e-54	1.01485
1	3187	Ichthyosporea/Fungi?							5.49039	0	4.21069	2:C/T		2e-23	0.755
1	2757	Ichthyosporea/Fungi?							5.43998	1.68698	4.34493	2:C/T		3e-52	0.866337
1	270	Ichthyosporea/Fungi?							203.145	4.55349	225.925	2:C/T		3e-51	0.79397
1	4380	Ichthyosporea/Fungi?							3.41188	0	4.235	2:C/T		2e-49	1.01485
1	1487	Ichthyosporea/Fungi?							17.8706	0	25.8865	2:C/T		3e-47	0.866337
1	2948	Ichthyosporea/Fungi?							8.8888	0	3.61268	2:C/T		9e-32	0.681373
1	3479	chimera?							17.0156	0	17.3919	2:C/T		3e-34	0.53271
1	3557	chimera?							30.606	0	25.8254	2:C/T		3e-34	0.53271
1	5801	chimera?							5.46573	0	5.58985	2:C/T		3e-34	0.531056
1	4407	Metazoa	Annelida			Haplotaxida	Enchytraeidae		3.38722	0	2.57519	2:C/T		7e-14	0.465217
1	1514	Metazoa	Annelida	Clitellata	Haplotaxida	Tubificidae	Rhyacodrilus	Rhyacodrilus_falciformis	25.0271	0	27.8515	2:C/T		8e-94	1.00667
1	2173	Metazoa	Annelida	Clitellata	Haplotaxida	Tubificidae	Rhyacodrilus	Rhyacodrilus_falciformis	11.0211	0	17.0259	2:C/T		8e-94	0.947541
1	6720	Metazoa	Arthropoda	Maxillopoda	Cyclopoida	Cyclopidae	Acanthocyclops	Acanthocyclops_robustus	3.8399	0	1.31812	2:C/T		5e-59	0.871287
1	379	Stramenopiles_no_rank	Bacillariophyta		Naviculales	Naviculaceae	Navicula	Navicula cryptocephala	159.353	0	167.048	2:C/T		3e-17	0.586345
1	469	Stramenopiles_no_rank	Bacillariophyta		Naviculales	Naviculaceae	Navicula	Navicula sp.	136.933	0	127.04	2:C/T		4e-16	0.616935
1	3191	(protists)				Paramoebidae	Paramoeba	Paramoeba sp.	5.9901	0	11.6313	2:C/T		7e-20	0.802013
1	3801	(protists)				Paramoebidae	Paramoeba	Paramoeba sp.	4.23989	0.798608	8.11616	2:C/T		7e-20	0.802013
1	4891	(protists)				Paramoebidae	Paramoeba	Paramoeba sp.	2.99168	0	4.18639	2:C/T		7e-20	0.802013
1	5450	(protists)				Paramoebidae	Paramoeba	Paramoeba sp.	5.47246	0	4.9551	2:C/T		7e-20	0.802013
1	3281	(protists)				Paramoebidae	Paramoeba	Paramoeba sp.	9.34485	0	12.6078	2:C/T		1e-17	0.803987
1	3792	(protists)				Paramoebidae	Paramoeba	Paramoeba sp.	5.50831	0	9.75166	2:C/T		3e-18	0.802013
1	3592	(protists)				Paramoebidae	Paramoeba	Paramoeba sp.	5.92178	0	8.42139	2:C/T		1e-17	0.803987
1	3686	(protists)				Paramoebidae	Paramoeba	Paramoeba sp.	3.85446	1.68698	10.9234	2:C/T		1e-16	0.802013
1	3835	Stramenopiles_no_rank		Oomycetes	Pythiales	Pythiaceae	Pythium	Pythium ultimum	14.0665	0.888373	8.61639	2:C/T		9e-05	0.206806
1	403	(protists)				Plasmodiophoridae	Polymyxa	Polymyxa graminis	2.97376	0	215.953	2:C/T		6e-12	0.445312
1	1066	Stramenopiles_no_rank	Bacillariophyta	Bacillariophyceae	Cymbellales	Gomphonemataceae	Gomphonema	Gomphonema_parvulum	33.2066	0	37.0659	2:C/T		4e-126	0.99635
1	1241	Stramenopiles_no_rank	Bacillariophyta	Bacillariophyceae	Cymbellales	Gomphonemataceae	Gomphonema	Gomphonema_parvulum	27.1695	0	32.1721	2:C/T		1e-101	1.03396
1	1479	Stramenopiles_no_rank	Bacillariophyta	Bacillariophyceae	Cymbellales	Gomphonemataceae	Gomphonema	Gomphonema_parvulum	25.8126	0	22.2495	2:C/T		2e-103	1.03396
1	1519	Stramenopiles_no_rank	Bacillariophyta	Bacillariophyceae	Cymbellales	Gomphonemataceae	Gomphonema	Gomphonema_parvulum	24.6193	0	20.7971	2:C/T		4e-126	0.99635
1	1837	Stramenopiles_no_rank	Bacillariophyta	Bacillariophyceae	Cymbellales	Gomphonemataceae	Gomphonema	Gomphonema_parvulum	11.9231	0	14.7924	2:C/T		1e-101	1.03396
1	3179	Stramenopiles_no_rank	Bacillariophyta	Bacillariophyceae	Cymbellales	Gomphonemataceae	Gomphonema	Gomphonema_parvulum	7.67644	0	15.7931	2:C/T		2e-124	0.996364
1	3648	Stramenopiles_no_rank	Bacillariophyta	Bacillariophyceae	Cymbellales	Gomphonemataceae	Gomphonema	Gomphonema_parvulum	4.26455	0	6.81019	2:C/T		2e-103	1.03396
1	3969	Stramenopiles_no_rank	Bacillariophyta	Bacillariophyceae	Cymbellales	Gomphonemataceae	Gomphonema	Gomphonema_parvulum	3.7895	0	4.29604	2:C/T		1e-101	1.03396
1	6951	Stramenopiles_no_rank	Bacillariophyta	Bacillariophyceae	Cymbellales	Gomphonemataceae	Gomphonema	Gomphonema_parvulum	2.10317	0	1.24492	2:C/T		4e-121	0.996364
