# Supplementary material for: The Endophytic Mycobiome of European Ash and Sycamore Maple Leaves – Geographic Patterns, Host Specificity and Influence of Ash Dieback
Source: Front Microbiol. 2018 Oct 24;9:2345. doi: 10.3389/fmicb.2018.02345 (PMC6207852; doi:10.3389/fmicb.2018.02345)
Supplement: Supplementary file 3 [file Table_3.xlsx]

## Sheet: information
	Supplementary Table File 3: This sheet summarises the occurrence of different dinucleotide sequences at the end of the ITS4f/ITS4f2 primers.
	In each workbook, the summary is done for a different taxonomic rank.
	The species workbook contains a summary over all sequences from Genbank (2017-11-08)
	for which an LSU region containg the ITS4f primer was found.
	For higher ranks, species counts with the given dinucleotide sequence are given (predominant sequence per species).
	Unusual sequences present in only few species may have to be critically reviewed because there could be sequencing errors.
	The most detailed information is available in the sequences workbook, which lists all sequences along with
	mismatches (as generated by USEARCH search_oligodb). Sequencing errors (e.g. InDels) or even unspecific primer
	matches may be assumed if there is an exceptional high number of mismatches in just one sequence.
	Note: This sheet may not contain all sequences with information available since 22 bp have been trimmed from sequence starts and ends
	Number of mismatches of most frequent dinucleotides to primers:
		ITS4f	ITS4f2
		AC	A[C/T]
	GT	2	1	most plants
	AT	1	0	animals, protists, some plants, few fungi
	GC	1	1	some plants
	AC	0	0	fungi, some protists, animals & green algae

## Sheet: phylum
							Number of species with the given end sequence
phylum	GT	AT	GC	AC	AG	TT	AA	CT	Other
all (sum)	9369	1437	323	471	29	9	5	2	18
Chlorophyta		41		447	1		3	1
Streptophyta	9369	1396	323	24	28	9	2	1	18

## Sheet: class
								Number of species with the given end sequence
phylum	class	GT	AT	AC	GC	AG	TT	AA	CT	Other
	all (sum)	9369	1437	471	323	29	9	5	2	18
Chlorophyta	Chlorodendrophyceae			9
Chlorophyta	Chlorophyceae		1	184				1
Chlorophyta	Chlorophyta_Incertae_sedis		8	4
Chlorophyta	Mamiellophyceae		27	1
Chlorophyta	Nephroselmidophyceae		5
Chlorophyta	Pedinophyceae			5
Chlorophyta	Trebouxiophyceae			180				2	1
Chlorophyta	Ulvophyceae			64		1
Streptophyta	Bryopsida	88	6	1
Streptophyta	Charophyceae		23			1
Streptophyta	Coleochaetophyceae		1	1
Streptophyta	Jungermanniopsida	466	2			3
Streptophyta	Klebsormidiophyceae		16
Streptophyta	Liliopsida	1695	144		148	4	2	1	1	2
Streptophyta	Lycopodiopsida	3
Streptophyta	Marchantiopsida	24
Streptophyta	Polypodiopsida	2
Streptophyta	Streptophyta_Incertae_sedis	7090	1202	22	175	20	7	1		16
Streptophyta	Takakiopsida	1
Streptophyta	Zygnemophyceae		2

## Sheet: order
			Number of species with the given end sequence
phylum	class	order	GT	AT	AC	GC	AG	TT	AA	CT	Other
		all (sum)	9369	1437	471	323	29	9	5	2	18
Chlorophyta	Chlorodendrophyceae	Chlorodendrales			9
Chlorophyta	Chlorophyceae	Chaetopeltidales			4
Chlorophyta	Chlorophyceae	Chaetophorales		1	28
Chlorophyta	Chlorophyceae	Chlamydomonadales			103				1
Chlorophyta	Chlorophyceae	Chlorophyceae_Incertae_sedis			11
Chlorophyta	Chlorophyceae	Oedogoniales			2
Chlorophyta	Chlorophyceae	Sphaeropleales			35
Chlorophyta	Chlorophyceae	Tetrasporales			1
Chlorophyta	Chlorophyta_Incertae_sedis	Incertae_sedis		2	4
Chlorophyta	Chlorophyta_Incertae_sedis	Prasinococcales		2
Chlorophyta	Chlorophyta_Incertae_sedis	Pyramimonadales		4
Chlorophyta	Mamiellophyceae	Dolichomastigales		1	1
Chlorophyta	Mamiellophyceae	Mamiellales		25
Chlorophyta	Mamiellophyceae	Monomastigales		1
Chlorophyta	Nephroselmidophyceae	Nephroselmidophyceae_Incertae_sedis		5
Chlorophyta	Pedinophyceae	Marsupiomonadales			1
Chlorophyta	Pedinophyceae	Pedinomonadales			4
Chlorophyta	Trebouxiophyceae	Chlorellales			58				1	1
Chlorophyta	Trebouxiophyceae	Microthamniales			64				1
Chlorophyta	Trebouxiophyceae	Prasiolales			4
Chlorophyta	Trebouxiophyceae	Trebouxiophyceae_Incertae_sedis			54
Chlorophyta	Ulvophyceae	Bryopsidales			32		1
Chlorophyta	Ulvophyceae	Cladophorales			7
Chlorophyta	Ulvophyceae	Ignatiales			1
Chlorophyta	Ulvophyceae	Trentepohliales			18
Chlorophyta	Ulvophyceae	Ulotrichales			1
Chlorophyta	Ulvophyceae	Ulvales			2
Chlorophyta	Ulvophyceae	Ulvophyceae_Incertae_sedis			3
Streptophyta	Bryopsida	Bryales	1
Streptophyta	Bryopsida	Dicranales	21	4	1
Streptophyta	Bryopsida	Funariales	2
Streptophyta	Bryopsida	Hookeriales		2
Streptophyta	Bryopsida	Hypnales	60
Streptophyta	Bryopsida	Pottiales	1
Streptophyta	Bryopsida	Pseudoditrichales	2
Streptophyta	Bryopsida	Rhizogoniales	1
Streptophyta	Charophyceae	Charales		23			1
Streptophyta	Coleochaetophyceae	Coleochaetales		1	1
Streptophyta	Jungermanniopsida	Jungermanniales	68				3
Streptophyta	Jungermanniopsida	Metzgeriales	8
Streptophyta	Jungermanniopsida	Pelliales	1
Streptophyta	Jungermanniopsida	Porellales	389	2
Streptophyta	Klebsormidiophyceae	Klebsormidiales		16
Streptophyta	Liliopsida	Acorales	7								1
Streptophyta	Liliopsida	Alismatales	61	2		1	1
Streptophyta	Liliopsida	Arecales				127
Streptophyta	Liliopsida	Asparagales	884	5		18	3		1	1
Streptophyta	Liliopsida	Commelinales		2
Streptophyta	Liliopsida	Dioscoreales	3			1
Streptophyta	Liliopsida	Liliales	155	3		1
Streptophyta	Liliopsida	Poales	356	127							1
Streptophyta	Liliopsida	Zingiberales	229	5				2
Streptophyta	Lycopodiopsida	Isoetales	2
Streptophyta	Lycopodiopsida	Lycopodiales	1
Streptophyta	Marchantiopsida	Marchantiales	24
Streptophyta	Polypodiopsida	Polypodiales	2
Streptophyta	Streptophyta_Incertae_sedis	Apiales	128	1
Streptophyta	Streptophyta_Incertae_sedis	Aquifoliales	4
Streptophyta	Streptophyta_Incertae_sedis	Araucariales				120
Streptophyta	Streptophyta_Incertae_sedis	Asterales	670	15			2
Streptophyta	Streptophyta_Incertae_sedis	Austrobaileyales	9
Streptophyta	Streptophyta_Incertae_sedis	Boraginales	24	50
Streptophyta	Streptophyta_Incertae_sedis	Brassicales	102	5
Streptophyta	Streptophyta_Incertae_sedis	Buxales	20	3							1
Streptophyta	Streptophyta_Incertae_sedis	Canellales		1
Streptophyta	Streptophyta_Incertae_sedis	Caryophyllales	257	207	1	3	1
Streptophyta	Streptophyta_Incertae_sedis	Celastrales	10
Streptophyta	Streptophyta_Incertae_sedis	Ceratophyllales	3
Streptophyta	Streptophyta_Incertae_sedis	Cornales	1
Streptophyta	Streptophyta_Incertae_sedis	Crossosomatales	4
Streptophyta	Streptophyta_Incertae_sedis	Cucurbitales	54	62
Streptophyta	Streptophyta_Incertae_sedis	Cupressales	3
Streptophyta	Streptophyta_Incertae_sedis	Cycadales	19
Streptophyta	Streptophyta_Incertae_sedis	Dipsacales	15
Streptophyta	Streptophyta_Incertae_sedis	Ephedrales	38
Streptophyta	Streptophyta_Incertae_sedis	Ericales	1121	48			1
Streptophyta	Streptophyta_Incertae_sedis	Fabales	783	379		3	8	3			1
Streptophyta	Streptophyta_Incertae_sedis	Fagales	4	7
Streptophyta	Streptophyta_Incertae_sedis	Garryales	1
Streptophyta	Streptophyta_Incertae_sedis	Gentianales	406	4	1						1
Streptophyta	Streptophyta_Incertae_sedis	Geraniales	1	9
Streptophyta	Streptophyta_Incertae_sedis	Ginkgoales	1
Streptophyta	Streptophyta_Incertae_sedis	Gnetales	18
Streptophyta	Streptophyta_Incertae_sedis	Gunnerales	6			8
Streptophyta	Streptophyta_Incertae_sedis	Huerteales	1
Streptophyta	Streptophyta_Incertae_sedis	Icacinales	2
Streptophyta	Streptophyta_Incertae_sedis	Incertae_sedis		1
Streptophyta	Streptophyta_Incertae_sedis	Lamiales	937	30			1				11
Streptophyta	Streptophyta_Incertae_sedis	Laurales	41	59	1			1
Streptophyta	Streptophyta_Incertae_sedis	Magnoliales	29
Streptophyta	Streptophyta_Incertae_sedis	Malpighiales	335	34		2	1				1
Streptophyta	Streptophyta_Incertae_sedis	Malvales	47	3			1
Streptophyta	Streptophyta_Incertae_sedis	Metteniusales	2
Streptophyta	Streptophyta_Incertae_sedis	Myrtales	1493	34	1		3		1		1
Streptophyta	Streptophyta_Incertae_sedis	Nymphaeales	9
Streptophyta	Streptophyta_Incertae_sedis	Oxalidales	4	1
Streptophyta	Streptophyta_Incertae_sedis	Pinales	1
Streptophyta	Streptophyta_Incertae_sedis	Piperales	38	1	17	37	1
Streptophyta	Streptophyta_Incertae_sedis	Proteales	75
Streptophyta	Streptophyta_Incertae_sedis	Ranunculales	107	62	1		1	1
Streptophyta	Streptophyta_Incertae_sedis	Rosales	40	132
Streptophyta	Streptophyta_Incertae_sedis	Santalales	3	3
Streptophyta	Streptophyta_Incertae_sedis	Sapindales	130	1				1
Streptophyta	Streptophyta_Incertae_sedis	Saxifragales	37	49
Streptophyta	Streptophyta_Incertae_sedis	Solanales	50			1		1
Streptophyta	Streptophyta_Incertae_sedis	Trochodendrales		1
Streptophyta	Streptophyta_Incertae_sedis	Vitales	6
Streptophyta	Streptophyta_Incertae_sedis	Zygophyllales	1			1
Streptophyta	Takakiopsida	Takakiales	1
Streptophyta	Zygnemophyceae	Desmidiales		1
Streptophyta	Zygnemophyceae	Zygnematales		1

## Sheet: family
				Number of species with the given end sequence
phylum	class	order	family	GT	AT	GC	AC	AG	TT	AA	CT	Other
			all (sum)	9369	1437	323	471	29	9	5	2	18
Chlorophyta	Chlorodendrophyceae	Chlorodendrales	Chlorodendraceae				9
Chlorophyta	Chlorophyceae	Chaetopeltidales	Chaetopeltidaceae				4
Chlorophyta	Chlorophyceae	Chaetophorales	Aphanochaetaceae				3
Chlorophyta	Chlorophyceae	Chaetophorales	Barrancaceae				1
Chlorophyta	Chlorophyceae	Chaetophorales	Chaetophoraceae				7
Chlorophyta	Chlorophyceae	Chaetophorales	Chaetophorales_Incertae_sedis				10
Chlorophyta	Chlorophyceae	Chaetophorales	Schizomeridaceae				1
Chlorophyta	Chlorophyceae	Chaetophorales	Uronemataceae		1		6
Chlorophyta	Chlorophyceae	Chlamydomonadales	Asteromonadaceae				1
Chlorophyta	Chlorophyceae	Chlamydomonadales	Chlamydomonadaceae				88			1
Chlorophyta	Chlorophyceae	Chlamydomonadales	Chlamydomonadales_Incertae_sedis				3
Chlorophyta	Chlorophyceae	Chlamydomonadales	Chlorococcaceae				4
Chlorophyta	Chlorophyceae	Chlamydomonadales	Dunaliellaceae				4
Chlorophyta	Chlorophyceae	Chlamydomonadales	Haematococcaceae				1
Chlorophyta	Chlorophyceae	Chlamydomonadales	Volvocaceae				2
Chlorophyta	Chlorophyceae	Chlorophyceae_Incertae_sedis	Incertae_sedis				11
Chlorophyta	Chlorophyceae	Oedogoniales	Oedogoniales_Incertae_sedis				2
Chlorophyta	Chlorophyceae	Sphaeropleales	Chromochloridaceae				1
Chlorophyta	Chlorophyceae	Sphaeropleales	Hydrodictyaceae				2
Chlorophyta	Chlorophyceae	Sphaeropleales	Mychonastaceae				1
Chlorophyta	Chlorophyceae	Sphaeropleales	Neochloridaceae				2
Chlorophyta	Chlorophyceae	Sphaeropleales	Scenedesmaceae				24
Chlorophyta	Chlorophyceae	Sphaeropleales	Selenastraceae				5
Chlorophyta	Chlorophyceae	Tetrasporales	Tetrasporales_Incertae_sedis				1
Chlorophyta	Chlorophyta_Incertae_sedis	Incertae_sedis	Incertae_sedis		1		4
Chlorophyta	Chlorophyta_Incertae_sedis	Incertae_sedis	Pycnococcaceae		1
Chlorophyta	Chlorophyta_Incertae_sedis	Prasinococcales	Prasinococcales_Incertae_sedis		2
Chlorophyta	Chlorophyta_Incertae_sedis	Pyramimonadales	Pyramimonadales_Incertae_sedis		4
Chlorophyta	Mamiellophyceae	Dolichomastigales	Crustomastigaceae		1
Chlorophyta	Mamiellophyceae	Dolichomastigales	Dolichomastigaceae				1
Chlorophyta	Mamiellophyceae	Mamiellales	Bathycoccaceae		4
Chlorophyta	Mamiellophyceae	Mamiellales	Mamiellaceae		17
Chlorophyta	Mamiellophyceae	Mamiellales	Mamiellales_Incertae_sedis		4
Chlorophyta	Mamiellophyceae	Monomastigales	Monomastigaceae		1
Chlorophyta	Nephroselmidophyceae	Nephroselmidophyceae_Incertae_sedis	Incertae_sedis		5
Chlorophyta	Pedinophyceae	Marsupiomonadales	Marsupiomonadaceae				1
Chlorophyta	Pedinophyceae	Pedinomonadales	Pedinomonadaceae				4
Chlorophyta	Trebouxiophyceae	Chlorellales	Chlorellaceae				48			1	1
Chlorophyta	Trebouxiophyceae	Chlorellales	Chlorellales_Incertae_sedis				2
Chlorophyta	Trebouxiophyceae	Chlorellales	Eremosphaeraceae				1
Chlorophyta	Trebouxiophyceae	Chlorellales	Oocystaceae				7
Chlorophyta	Trebouxiophyceae	Microthamniales	Microthamniales_Incertae_sedis				64			1
Chlorophyta	Trebouxiophyceae	Prasiolales	Koliellaceae				3
Chlorophyta	Trebouxiophyceae	Prasiolales	Prasiolaceae				1
Chlorophyta	Trebouxiophyceae	Trebouxiophyceae_Incertae_sedis	Botryococcaceae				1
Chlorophyta	Trebouxiophyceae	Trebouxiophyceae_Incertae_sedis	Coccomyxaceae				2
Chlorophyta	Trebouxiophyceae	Trebouxiophyceae_Incertae_sedis	Incertae_sedis				51
Chlorophyta	Ulvophyceae	Bryopsidales	Bryopsidaceae					1
Chlorophyta	Ulvophyceae	Bryopsidales	Caulerpaceae				14
Chlorophyta	Ulvophyceae	Bryopsidales	Halimedaceae				2
Chlorophyta	Ulvophyceae	Bryopsidales	Udoteaceae				16
Chlorophyta	Ulvophyceae	Cladophorales	Cladophoraceae				3
Chlorophyta	Ulvophyceae	Cladophorales	Pithophoraceae				4
Chlorophyta	Ulvophyceae	Ignatiales	Ignatiales_Incertae_sedis				1
Chlorophyta	Ulvophyceae	Trentepohliales	Trentepohliaceae				18
Chlorophyta	Ulvophyceae	Ulotrichales	Ulotrichaceae				1
Chlorophyta	Ulvophyceae	Ulvales	Ulvales_Incertae_sedis				1
Chlorophyta	Ulvophyceae	Ulvales	Ulvellaceae				1
Chlorophyta	Ulvophyceae	Ulvophyceae_Incertae_sedis	Incertae_sedis				3
Streptophyta	Bryopsida	Bryales	Bryaceae	1
Streptophyta	Bryopsida	Dicranales	Calymperaceae	2
Streptophyta	Bryopsida	Dicranales	Dicranaceae	1
Streptophyta	Bryopsida	Dicranales	Leucobryaceae	18	4		1
Streptophyta	Bryopsida	Funariales	Funariaceae	2
Streptophyta	Bryopsida	Hookeriales	Hypopterygiaceae		2
Streptophyta	Bryopsida	Hypnales	Amblystegiaceae	8
Streptophyta	Bryopsida	Hypnales	Brachytheciaceae	13
Streptophyta	Bryopsida	Hypnales	Calliergonaceae	8
Streptophyta	Bryopsida	Hypnales	Fontinalaceae	1
Streptophyta	Bryopsida	Hypnales	Hylocomiaceae	1
Streptophyta	Bryopsida	Hypnales	Hypnaceae	4
Streptophyta	Bryopsida	Hypnales	Plagiotheciaceae	21
Streptophyta	Bryopsida	Hypnales	Pylaisiadelphaceae	1
Streptophyta	Bryopsida	Hypnales	Sematophyllaceae	3
Streptophyta	Bryopsida	Pottiales	Pottiaceae	1
Streptophyta	Bryopsida	Pseudoditrichales	Ditrichaceae	2
Streptophyta	Bryopsida	Rhizogoniales	Aulacomniaceae	1
Streptophyta	Charophyceae	Charales	Characeae		23			1
Streptophyta	Coleochaetophyceae	Coleochaetales	Chaetosphaeridiaceae				1
Streptophyta	Coleochaetophyceae	Coleochaetales	Coleochaetaceae		1
Streptophyta	Jungermanniopsida	Jungermanniales	Adelanthaceae	5
Streptophyta	Jungermanniopsida	Jungermanniales	Anastrophyllaceae	2
Streptophyta	Jungermanniopsida	Jungermanniales	Brevianthaceae	2
Streptophyta	Jungermanniopsida	Jungermanniales	Cephaloziaceae	9
Streptophyta	Jungermanniopsida	Jungermanniales	Gymnomitriaceae	1
Streptophyta	Jungermanniopsida	Jungermanniales	Jamesoniellaceae	3
Streptophyta	Jungermanniopsida	Jungermanniales	Jungermanniaceae	19				1
Streptophyta	Jungermanniopsida	Jungermanniales	Lepidoziaceae	3
Streptophyta	Jungermanniopsida	Jungermanniales	Plagiochilaceae	23				1
Streptophyta	Jungermanniopsida	Jungermanniales	Scapaniaceae	1				1
Streptophyta	Jungermanniopsida	Metzgeriales	Aneuraceae	3
Streptophyta	Jungermanniopsida	Metzgeriales	Metzgeriaceae	5
Streptophyta	Jungermanniopsida	Pelliales	Pelliaceae	1
Streptophyta	Jungermanniopsida	Porellales	Frullaniaceae	131
Streptophyta	Jungermanniopsida	Porellales	Jubulaceae	1
Streptophyta	Jungermanniopsida	Porellales	Lejeuneaceae	250	2
Streptophyta	Jungermanniopsida	Porellales	Porellaceae	7
Streptophyta	Klebsormidiophyceae	Klebsormidiales	Klebsormidiaceae		15
Streptophyta	Klebsormidiophyceae	Klebsormidiales	Klebsormidiales_Incertae_sedis		1
Streptophyta	Liliopsida	Acorales	Acoraceae	7								1
Streptophyta	Liliopsida	Alismatales	Alismataceae	5
Streptophyta	Liliopsida	Alismatales	Araceae	29		1		1
Streptophyta	Liliopsida	Alismatales	Hydrocharitaceae	6	1
Streptophyta	Liliopsida	Alismatales	Potamogetonaceae	18	1
Streptophyta	Liliopsida	Alismatales	Tofieldiaceae	3
Streptophyta	Liliopsida	Arecales	Arecaceae			127
Streptophyta	Liliopsida	Asparagales	Amaryllidaceae	55		10		3			1
Streptophyta	Liliopsida	Asparagales	Asparagaceae	10		2				1
Streptophyta	Liliopsida	Asparagales	Asphodelaceae	53		2
Streptophyta	Liliopsida	Asparagales	Hyacinthaceae	1		1
Streptophyta	Liliopsida	Asparagales	Iridaceae	10	1	2
Streptophyta	Liliopsida	Asparagales	Orchidaceae	755	4	1
Streptophyta	Liliopsida	Commelinales	Hanguanaceae		2
Streptophyta	Liliopsida	Dioscoreales	Dioscoreaceae	3		1
Streptophyta	Liliopsida	Liliales	Campynemataceae	1
Streptophyta	Liliopsida	Liliales	Corsiaceae	2
Streptophyta	Liliopsida	Liliales	Liliaceae	25	3
Streptophyta	Liliopsida	Liliales	Melanthiaceae	13
Streptophyta	Liliopsida	Liliales	Philesiaceae	1
Streptophyta	Liliopsida	Liliales	Ripogonaceae	3
Streptophyta	Liliopsida	Liliales	Smilacaceae	110		1
Streptophyta	Liliopsida	Poales	Cyperaceae	17
Streptophyta	Liliopsida	Poales	Juncaceae	33
Streptophyta	Liliopsida	Poales	Mayacaceae		1
Streptophyta	Liliopsida	Poales	Poaceae	306	126							1
Streptophyta	Liliopsida	Zingiberales	Cannaceae	1
Streptophyta	Liliopsida	Zingiberales	Costaceae	5
Streptophyta	Liliopsida	Zingiberales	Heliconiaceae	46	1
Streptophyta	Liliopsida	Zingiberales	Lowiaceae	14
Streptophyta	Liliopsida	Zingiberales	Marantaceae	91
Streptophyta	Liliopsida	Zingiberales	Musaceae	9
Streptophyta	Liliopsida	Zingiberales	Strelitziaceae	4
Streptophyta	Liliopsida	Zingiberales	Zingiberaceae	59	4				2
Streptophyta	Lycopodiopsida	Isoetales	Isoetaceae	2
Streptophyta	Lycopodiopsida	Lycopodiales	Lycopodiaceae	1
Streptophyta	Marchantiopsida	Marchantiales	Marchantiaceae	1
Streptophyta	Marchantiopsida	Marchantiales	Ricciaceae	23
Streptophyta	Polypodiopsida	Polypodiales	Dryopteridaceae	1
Streptophyta	Polypodiopsida	Polypodiales	Polypodiaceae	1
Streptophyta	Streptophyta_Incertae_sedis	Apiales	Apiaceae	100	1
Streptophyta	Streptophyta_Incertae_sedis	Apiales	Araliaceae	20
Streptophyta	Streptophyta_Incertae_sedis	Apiales	Griseliniaceae	7
Streptophyta	Streptophyta_Incertae_sedis	Apiales	Pittosporaceae	1
Streptophyta	Streptophyta_Incertae_sedis	Aquifoliales	Aquifoliaceae	3
Streptophyta	Streptophyta_Incertae_sedis	Aquifoliales	Stemonuraceae	1
Streptophyta	Streptophyta_Incertae_sedis	Araucariales	Podocarpaceae			120
Streptophyta	Streptophyta_Incertae_sedis	Asterales	Asteraceae	586	1			2
Streptophyta	Streptophyta_Incertae_sedis	Asterales	Calyceraceae	5
Streptophyta	Streptophyta_Incertae_sedis	Asterales	Campanulaceae	50	14
Streptophyta	Streptophyta_Incertae_sedis	Asterales	Goodeniaceae	24
Streptophyta	Streptophyta_Incertae_sedis	Asterales	Menyanthaceae	4
Streptophyta	Streptophyta_Incertae_sedis	Asterales	Rousseaceae	1
Streptophyta	Streptophyta_Incertae_sedis	Austrobaileyales	Schisandraceae	9
Streptophyta	Streptophyta_Incertae_sedis	Boraginales	Boraginaceae	1	50
Streptophyta	Streptophyta_Incertae_sedis	Boraginales	Cordiaceae	16
Streptophyta	Streptophyta_Incertae_sedis	Boraginales	Ehretiaceae	4
Streptophyta	Streptophyta_Incertae_sedis	Boraginales	Heliotropiaceae	3
Streptophyta	Streptophyta_Incertae_sedis	Brassicales	Brassicaceae	95
Streptophyta	Streptophyta_Incertae_sedis	Brassicales	Capparaceae	3
Streptophyta	Streptophyta_Incertae_sedis	Brassicales	Caricaceae	3	5
Streptophyta	Streptophyta_Incertae_sedis	Brassicales	Cleomaceae	1
Streptophyta	Streptophyta_Incertae_sedis	Buxales	Buxaceae	20	3							1
Streptophyta	Streptophyta_Incertae_sedis	Canellales	Winteraceae		1
Streptophyta	Streptophyta_Incertae_sedis	Caryophyllales	Aizoaceae	5
Streptophyta	Streptophyta_Incertae_sedis	Caryophyllales	Amaranthaceae	3			1
Streptophyta	Streptophyta_Incertae_sedis	Caryophyllales	Ancistrocladaceae	43
Streptophyta	Streptophyta_Incertae_sedis	Caryophyllales	Cactaceae	1
Streptophyta	Streptophyta_Incertae_sedis	Caryophyllales	Caryophyllaceae	7	207
Streptophyta	Streptophyta_Incertae_sedis	Caryophyllales	Chenopodiaceae	43				1
Streptophyta	Streptophyta_Incertae_sedis	Caryophyllales	Droseraceae	1
Streptophyta	Streptophyta_Incertae_sedis	Caryophyllales	Frankeniaceae	1
Streptophyta	Streptophyta_Incertae_sedis	Caryophyllales	Montiaceae	5
Streptophyta	Streptophyta_Incertae_sedis	Caryophyllales	Nepenthaceae	75		3
Streptophyta	Streptophyta_Incertae_sedis	Caryophyllales	Nyctaginaceae	3
Streptophyta	Streptophyta_Incertae_sedis	Caryophyllales	Plumbaginaceae	8
Streptophyta	Streptophyta_Incertae_sedis	Caryophyllales	Polygonaceae	58
Streptophyta	Streptophyta_Incertae_sedis	Caryophyllales	Portulacaceae	3
Streptophyta	Streptophyta_Incertae_sedis	Caryophyllales	Talinaceae	1
Streptophyta	Streptophyta_Incertae_sedis	Celastrales	Celastraceae	10
Streptophyta	Streptophyta_Incertae_sedis	Ceratophyllales	Ceratophyllaceae	3
Streptophyta	Streptophyta_Incertae_sedis	Cornales	Cornaceae	1
Streptophyta	Streptophyta_Incertae_sedis	Crossosomatales	Staphyleaceae	4
Streptophyta	Streptophyta_Incertae_sedis	Cucurbitales	Cucurbitaceae	53	62
Streptophyta	Streptophyta_Incertae_sedis	Cucurbitales	Tetramelaceae	1
Streptophyta	Streptophyta_Incertae_sedis	Cupressales	Cupressaceae	1
Streptophyta	Streptophyta_Incertae_sedis	Cupressales	Taxaceae	2
Streptophyta	Streptophyta_Incertae_sedis	Cycadales	Cycadaceae	1
Streptophyta	Streptophyta_Incertae_sedis	Cycadales	Zamiaceae	18
Streptophyta	Streptophyta_Incertae_sedis	Dipsacales	Adoxaceae	8
Streptophyta	Streptophyta_Incertae_sedis	Dipsacales	Caprifoliaceae	7
Streptophyta	Streptophyta_Incertae_sedis	Ephedrales	Ephedraceae	38
Streptophyta	Streptophyta_Incertae_sedis	Ericales	Actinidiaceae	42
Streptophyta	Streptophyta_Incertae_sedis	Ericales	Balsaminaceae	3
Streptophyta	Streptophyta_Incertae_sedis	Ericales	Clethraceae	16
Streptophyta	Streptophyta_Incertae_sedis	Ericales	Cyrillaceae	2
Streptophyta	Streptophyta_Incertae_sedis	Ericales	Diapensiaceae	7	1
Streptophyta	Streptophyta_Incertae_sedis	Ericales	Ebenaceae	3
Streptophyta	Streptophyta_Incertae_sedis	Ericales	Ericaceae	522	1
Streptophyta	Streptophyta_Incertae_sedis	Ericales	Lecythidaceae	4
Streptophyta	Streptophyta_Incertae_sedis	Ericales	Marcgraviaceae	1
Streptophyta	Streptophyta_Incertae_sedis	Ericales	Pentaphylacaceae	7
Streptophyta	Streptophyta_Incertae_sedis	Ericales	Polemoniaceae	1
Streptophyta	Streptophyta_Incertae_sedis	Ericales	Primulaceae	32	46
Streptophyta	Streptophyta_Incertae_sedis	Ericales	Roridulaceae	1
Streptophyta	Streptophyta_Incertae_sedis	Ericales	Sapotaceae	420				1
Streptophyta	Streptophyta_Incertae_sedis	Ericales	Sarraceniaceae	15
Streptophyta	Streptophyta_Incertae_sedis	Ericales	Sladeniaceae	1
Streptophyta	Streptophyta_Incertae_sedis	Ericales	Styracaceae	4
Streptophyta	Streptophyta_Incertae_sedis	Ericales	Symplocaceae	2
Streptophyta	Streptophyta_Incertae_sedis	Ericales	Theaceae	38
Streptophyta	Streptophyta_Incertae_sedis	Fabales	Fabaceae	778	379	3		8	3			1
Streptophyta	Streptophyta_Incertae_sedis	Fabales	Polygalaceae	5
Streptophyta	Streptophyta_Incertae_sedis	Fagales	Betulaceae	1	4
Streptophyta	Streptophyta_Incertae_sedis	Fagales	Fagaceae	3
Streptophyta	Streptophyta_Incertae_sedis	Fagales	Juglandaceae		3
Streptophyta	Streptophyta_Incertae_sedis	Garryales	Garryaceae	1
Streptophyta	Streptophyta_Incertae_sedis	Gentianales	Apocynaceae	40	1
Streptophyta	Streptophyta_Incertae_sedis	Gentianales	Gentianaceae	18
Streptophyta	Streptophyta_Incertae_sedis	Gentianales	Loganiaceae	5
Streptophyta	Streptophyta_Incertae_sedis	Gentianales	Rubiaceae	343	3		1					1
Streptophyta	Streptophyta_Incertae_sedis	Geraniales	Geraniaceae	1	9
Streptophyta	Streptophyta_Incertae_sedis	Ginkgoales	Ginkgoaceae	1
Streptophyta	Streptophyta_Incertae_sedis	Gnetales	Gnetaceae	18
Streptophyta	Streptophyta_Incertae_sedis	Gunnerales	Gunneraceae	6		8
Streptophyta	Streptophyta_Incertae_sedis	Huerteales	Tapisciaceae	1
Streptophyta	Streptophyta_Incertae_sedis	Icacinales	Icacinaceae	2
Streptophyta	Streptophyta_Incertae_sedis	Incertae_sedis	Incertae_sedis		1
Streptophyta	Streptophyta_Incertae_sedis	Lamiales	Acanthaceae	48
Streptophyta	Streptophyta_Incertae_sedis	Lamiales	Bignoniaceae	9
Streptophyta	Streptophyta_Incertae_sedis	Lamiales	Carlemanniaceae	1
Streptophyta	Streptophyta_Incertae_sedis	Lamiales	Gesneriaceae	377	23
Streptophyta	Streptophyta_Incertae_sedis	Lamiales	Lamiaceae	195	1							11
Streptophyta	Streptophyta_Incertae_sedis	Lamiales	Lamiales_Incertae_sedis	1
Streptophyta	Streptophyta_Incertae_sedis	Lamiales	Lentibulariaceae	6	1
Streptophyta	Streptophyta_Incertae_sedis	Lamiales	Oleaceae	10	3
Streptophyta	Streptophyta_Incertae_sedis	Lamiales	Orobanchaceae	40
Streptophyta	Streptophyta_Incertae_sedis	Lamiales	Paulowniaceae	2
Streptophyta	Streptophyta_Incertae_sedis	Lamiales	Pedaliaceae	3
Streptophyta	Streptophyta_Incertae_sedis	Lamiales	Plantaginaceae	133				1
Streptophyta	Streptophyta_Incertae_sedis	Lamiales	Scrophulariaceae	104	1
Streptophyta	Streptophyta_Incertae_sedis	Lamiales	Stilbaceae	6
Streptophyta	Streptophyta_Incertae_sedis	Lamiales	Verbenaceae	2	1
Streptophyta	Streptophyta_Incertae_sedis	Laurales	Lauraceae	40	59		1		1
Streptophyta	Streptophyta_Incertae_sedis	Laurales	Siparunaceae	1
Streptophyta	Streptophyta_Incertae_sedis	Magnoliales	Annonaceae	28
Streptophyta	Streptophyta_Incertae_sedis	Magnoliales	Myristicaceae	1
Streptophyta	Streptophyta_Incertae_sedis	Malpighiales	Calophyllaceae	3
Streptophyta	Streptophyta_Incertae_sedis	Malpighiales	Chrysobalanaceae	30
Streptophyta	Streptophyta_Incertae_sedis	Malpighiales	Clusiaceae	39	4	1
Streptophyta	Streptophyta_Incertae_sedis	Malpighiales	Dichapetalaceae	1
Streptophyta	Streptophyta_Incertae_sedis	Malpighiales	Euphorbiaceae	122	3
Streptophyta	Streptophyta_Incertae_sedis	Malpighiales	Euphroniaceae	1
Streptophyta	Streptophyta_Incertae_sedis	Malpighiales	Hypericaceae	2	10
Streptophyta	Streptophyta_Incertae_sedis	Malpighiales	Linaceae	4
Streptophyta	Streptophyta_Incertae_sedis	Malpighiales	Malpighiaceae	1
Streptophyta	Streptophyta_Incertae_sedis	Malpighiales	Ochnaceae	1
Streptophyta	Streptophyta_Incertae_sedis	Malpighiales	Passifloraceae	23
Streptophyta	Streptophyta_Incertae_sedis	Malpighiales	Phyllanthaceae	88	17	1		1				1
Streptophyta	Streptophyta_Incertae_sedis	Malpighiales	Putranjivaceae	5
Streptophyta	Streptophyta_Incertae_sedis	Malpighiales	Rafflesiaceae	11
Streptophyta	Streptophyta_Incertae_sedis	Malpighiales	Salicaceae	4
Streptophyta	Streptophyta_Incertae_sedis	Malvales	Dipterocarpaceae	2
Streptophyta	Streptophyta_Incertae_sedis	Malvales	Malvaceae	30	3
Streptophyta	Streptophyta_Incertae_sedis	Malvales	Thymelaeaceae	15				1
Streptophyta	Streptophyta_Incertae_sedis	Metteniusales	Metteniusaceae	2
Streptophyta	Streptophyta_Incertae_sedis	Myrtales	Combretaceae	43			1
Streptophyta	Streptophyta_Incertae_sedis	Myrtales	Crypteroniaceae	1
Streptophyta	Streptophyta_Incertae_sedis	Myrtales	Lythraceae	39	1
Streptophyta	Streptophyta_Incertae_sedis	Myrtales	Melastomataceae	1291	1							1
Streptophyta	Streptophyta_Incertae_sedis	Myrtales	Myrtaceae	117	1			3
Streptophyta	Streptophyta_Incertae_sedis	Myrtales	Onagraceae	2	31					1
Streptophyta	Streptophyta_Incertae_sedis	Nymphaeales	Cabombaceae	3
Streptophyta	Streptophyta_Incertae_sedis	Nymphaeales	Nymphaeaceae	6
Streptophyta	Streptophyta_Incertae_sedis	Oxalidales	Cunoniaceae		1
Streptophyta	Streptophyta_Incertae_sedis	Oxalidales	Elaeocarpaceae	2
Streptophyta	Streptophyta_Incertae_sedis	Oxalidales	Oxalidaceae	2
Streptophyta	Streptophyta_Incertae_sedis	Pinales	Pinaceae	1
Streptophyta	Streptophyta_Incertae_sedis	Piperales	Aristolochiaceae	38
Streptophyta	Streptophyta_Incertae_sedis	Piperales	Piperaceae			37	17	1
Streptophyta	Streptophyta_Incertae_sedis	Piperales	Saururaceae		1
Streptophyta	Streptophyta_Incertae_sedis	Proteales	Proteaceae	17
Streptophyta	Streptophyta_Incertae_sedis	Proteales	Sabiaceae	58
Streptophyta	Streptophyta_Incertae_sedis	Ranunculales	Berberidaceae	63	13			1
Streptophyta	Streptophyta_Incertae_sedis	Ranunculales	Circaeasteraceae		1		1
Streptophyta	Streptophyta_Incertae_sedis	Ranunculales	Lardizabalaceae	1
Streptophyta	Streptophyta_Incertae_sedis	Ranunculales	Menispermaceae	7					1
Streptophyta	Streptophyta_Incertae_sedis	Ranunculales	Papaveraceae	3	24
Streptophyta	Streptophyta_Incertae_sedis	Ranunculales	Ranunculaceae	33	24
Streptophyta	Streptophyta_Incertae_sedis	Rosales	Cannabaceae	5	2
Streptophyta	Streptophyta_Incertae_sedis	Rosales	Elaeagnaceae	3
Streptophyta	Streptophyta_Incertae_sedis	Rosales	Moraceae	8
Streptophyta	Streptophyta_Incertae_sedis	Rosales	Rhamnaceae	16
Streptophyta	Streptophyta_Incertae_sedis	Rosales	Rosaceae		112
Streptophyta	Streptophyta_Incertae_sedis	Rosales	Ulmaceae	1	10
Streptophyta	Streptophyta_Incertae_sedis	Rosales	Urticaceae	7	8
Streptophyta	Streptophyta_Incertae_sedis	Santalales	Balanophoraceae		1
Streptophyta	Streptophyta_Incertae_sedis	Santalales	Mystropetalaceae		2
Streptophyta	Streptophyta_Incertae_sedis	Santalales	Santalaceae	2
Streptophyta	Streptophyta_Incertae_sedis	Santalales	Viscaceae	1
Streptophyta	Streptophyta_Incertae_sedis	Sapindales	Anacardiaceae	12
Streptophyta	Streptophyta_Incertae_sedis	Sapindales	Burseraceae	7
Streptophyta	Streptophyta_Incertae_sedis	Sapindales	Meliaceae	53	1
Streptophyta	Streptophyta_Incertae_sedis	Sapindales	Nitrariaceae	1
Streptophyta	Streptophyta_Incertae_sedis	Sapindales	Rutaceae	37					1
Streptophyta	Streptophyta_Incertae_sedis	Sapindales	Sapindaceae	15
Streptophyta	Streptophyta_Incertae_sedis	Sapindales	Simaroubaceae	5
Streptophyta	Streptophyta_Incertae_sedis	Saxifragales	Crassulaceae	12	1
Streptophyta	Streptophyta_Incertae_sedis	Saxifragales	Grossulariaceae	5
Streptophyta	Streptophyta_Incertae_sedis	Saxifragales	Haloragaceae	9
Streptophyta	Streptophyta_Incertae_sedis	Saxifragales	Hamamelidaceae	1
Streptophyta	Streptophyta_Incertae_sedis	Saxifragales	Paeoniaceae		4
Streptophyta	Streptophyta_Incertae_sedis	Saxifragales	Saxifragaceae	10	44
Streptophyta	Streptophyta_Incertae_sedis	Solanales	Convolvulaceae	28					1
Streptophyta	Streptophyta_Incertae_sedis	Solanales	Solanaceae	22		1
Streptophyta	Streptophyta_Incertae_sedis	Trochodendrales	Trochodendraceae		1
Streptophyta	Streptophyta_Incertae_sedis	Vitales	Vitaceae	6
Streptophyta	Streptophyta_Incertae_sedis	Zygophyllales	Zygophyllaceae	1		1
Streptophyta	Takakiopsida	Takakiales	Takakiaceae	1
Streptophyta	Zygnemophyceae	Desmidiales	Desmidiaceae		1
Streptophyta	Zygnemophyceae	Zygnematales	Zygnemataceae		1

## Sheet: genus
					Number of species with the given end sequence
phylum	class	order	family	genus	GT	AT	AC	GC	AG	TT	AA	CT	Other
				all (sum)	9369	1437	471	323	29	9	5	2	18
Chlorophyta	Chlorodendrophyceae	Chlorodendrales	Chlorodendraceae	Chlorodendraceae_Incertae_sedis			1
Chlorophyta	Chlorodendrophyceae	Chlorodendrales	Chlorodendraceae	Scherffelia			1
Chlorophyta	Chlorodendrophyceae	Chlorodendrales	Chlorodendraceae	Tetraselmis			7
Chlorophyta	Chlorophyceae	Chaetopeltidales	Chaetopeltidaceae	Chaetopeltis			1
Chlorophyta	Chlorophyceae	Chaetopeltidales	Chaetopeltidaceae	Dicranochaete			2
Chlorophyta	Chlorophyceae	Chaetopeltidales	Chaetopeltidaceae	Koshicola			1
Chlorophyta	Chlorophyceae	Chaetophorales	Aphanochaetaceae	Aphanochaete			2
Chlorophyta	Chlorophyceae	Chaetophorales	Aphanochaetaceae	Caespitella			1
Chlorophyta	Chlorophyceae	Chaetophorales	Barrancaceae	Barranca			1
Chlorophyta	Chlorophyceae	Chaetophorales	Chaetophoraceae	Chaetophora			5
Chlorophyta	Chlorophyceae	Chaetophorales	Chaetophoraceae	Draparnaldia			2
Chlorophyta	Chlorophyceae	Chaetophorales	Chaetophorales_Incertae_sedis	Stigeoclonium			10
Chlorophyta	Chlorophyceae	Chaetophorales	Schizomeridaceae	Schizomeris			1
Chlorophyta	Chlorophyceae	Chaetophorales	Uronemataceae	Uronema		1	6
Chlorophyta	Chlorophyceae	Chlamydomonadales	Asteromonadaceae	Asteromonas			1
Chlorophyta	Chlorophyceae	Chlamydomonadales	Chlamydomonadaceae	Chlamydomonadaceae_Incertae_sedis			18
Chlorophyta	Chlorophyceae	Chlamydomonadales	Chlamydomonadaceae	Chlamydomonas			55				1
Chlorophyta	Chlorophyceae	Chlamydomonadales	Chlamydomonadaceae	Chloromonas			14
Chlorophyta	Chlorophyceae	Chlamydomonadales	Chlamydomonadaceae	Lobochlamys			1
Chlorophyta	Chlorophyceae	Chlamydomonadales	Chlamydomonadales_Incertae_sedis	Borodinellopsis			1
Chlorophyta	Chlorophyceae	Chlamydomonadales	Chlamydomonadales_Incertae_sedis	Incertae_sedis			1
Chlorophyta	Chlorophyceae	Chlamydomonadales	Chlamydomonadales_Incertae_sedis	Ploeotila			1
Chlorophyta	Chlorophyceae	Chlamydomonadales	Chlorococcaceae	Chlorococcum			4
Chlorophyta	Chlorophyceae	Chlamydomonadales	Dunaliellaceae	Dunaliella			4
Chlorophyta	Chlorophyceae	Chlamydomonadales	Haematococcaceae	Haematococcus			1
Chlorophyta	Chlorophyceae	Chlamydomonadales	Volvocaceae	Gonium			1
Chlorophyta	Chlorophyceae	Chlamydomonadales	Volvocaceae	Yamagishiella			1
Chlorophyta	Chlorophyceae	Chlorophyceae_Incertae_sedis	Incertae_sedis	Carteria			2
Chlorophyta	Chlorophyceae	Chlorophyceae_Incertae_sedis	Incertae_sedis	Chlamydocapsa			1
Chlorophyta	Chlorophyceae	Chlorophyceae_Incertae_sedis	Incertae_sedis	Desmococcus			1
Chlorophyta	Chlorophyceae	Chlorophyceae_Incertae_sedis	Incertae_sedis	Gloeocystis			1
Chlorophyta	Chlorophyceae	Chlorophyceae_Incertae_sedis	Incertae_sedis	Incertae_sedis			1
Chlorophyta	Chlorophyceae	Chlorophyceae_Incertae_sedis	Incertae_sedis	Pleurastrum			3
Chlorophyta	Chlorophyceae	Chlorophyceae_Incertae_sedis	Incertae_sedis	Spermatozopsis			2
Chlorophyta	Chlorophyceae	Oedogoniales	Oedogoniales_Incertae_sedis	Incertae_sedis			1
Chlorophyta	Chlorophyceae	Oedogoniales	Oedogoniales_Incertae_sedis	Oedogonium			1
Chlorophyta	Chlorophyceae	Sphaeropleales	Chromochloridaceae	Chromochloris			1
Chlorophyta	Chlorophyceae	Sphaeropleales	Hydrodictyaceae	Hydrodictyon			1
Chlorophyta	Chlorophyceae	Sphaeropleales	Hydrodictyaceae	Parapediastrum			1
Chlorophyta	Chlorophyceae	Sphaeropleales	Mychonastaceae	Mychonastes			1
Chlorophyta	Chlorophyceae	Sphaeropleales	Neochloridaceae	Neochloris			2
Chlorophyta	Chlorophyceae	Sphaeropleales	Scenedesmaceae	Asterarcys			2
Chlorophyta	Chlorophyceae	Sphaeropleales	Scenedesmaceae	Desmodesmus			13
Chlorophyta	Chlorophyceae	Sphaeropleales	Scenedesmaceae	Pectinodesmus			1
Chlorophyta	Chlorophyceae	Sphaeropleales	Scenedesmaceae	Scenedesmus			4
Chlorophyta	Chlorophyceae	Sphaeropleales	Scenedesmaceae	Tetradesmus			3
Chlorophyta	Chlorophyceae	Sphaeropleales	Scenedesmaceae	Tetranephris			1
Chlorophyta	Chlorophyceae	Sphaeropleales	Selenastraceae	Ankistrodesmus			2
Chlorophyta	Chlorophyceae	Sphaeropleales	Selenastraceae	Nephrochlamys			1
Chlorophyta	Chlorophyceae	Sphaeropleales	Selenastraceae	Raphidocelis			1
Chlorophyta	Chlorophyceae	Sphaeropleales	Selenastraceae	Selenastraceae_Incertae_sedis			1
Chlorophyta	Chlorophyceae	Tetrasporales	Tetrasporales_Incertae_sedis	Fritschiella			1
Chlorophyta	Chlorophyta_Incertae_sedis	Incertae_sedis	Incertae_sedis	Incertae_sedis		1	3
Chlorophyta	Chlorophyta_Incertae_sedis	Incertae_sedis	Incertae_sedis	Picocystis			1
Chlorophyta	Chlorophyta_Incertae_sedis	Incertae_sedis	Pycnococcaceae	Pycnococcus		1
Chlorophyta	Chlorophyta_Incertae_sedis	Prasinococcales	Prasinococcales_Incertae_sedis	Prasinococcus		1
Chlorophyta	Chlorophyta_Incertae_sedis	Prasinococcales	Prasinococcales_Incertae_sedis	Prasinoderma		1
Chlorophyta	Chlorophyta_Incertae_sedis	Pyramimonadales	Pyramimonadales_Incertae_sedis	Cymbomonas		1
Chlorophyta	Chlorophyta_Incertae_sedis	Pyramimonadales	Pyramimonadales_Incertae_sedis	Pyramimonas		3
Chlorophyta	Mamiellophyceae	Dolichomastigales	Crustomastigaceae	Crustomastix		1
Chlorophyta	Mamiellophyceae	Dolichomastigales	Dolichomastigaceae	Dolichomastix			1
Chlorophyta	Mamiellophyceae	Mamiellales	Bathycoccaceae	Bathycoccus		1
Chlorophyta	Mamiellophyceae	Mamiellales	Bathycoccaceae	Ostreococcus		3
Chlorophyta	Mamiellophyceae	Mamiellales	Mamiellaceae	Mantoniella		1
Chlorophyta	Mamiellophyceae	Mamiellales	Mamiellaceae	Micromonas		16
Chlorophyta	Mamiellophyceae	Mamiellales	Mamiellales_Incertae_sedis	Incertae_sedis		4
Chlorophyta	Mamiellophyceae	Monomastigales	Monomastigaceae	Monomastix		1
Chlorophyta	Nephroselmidophyceae	Nephroselmidophyceae_Incertae_sedis	Incertae_sedis	Nephroselmis		5
Chlorophyta	Pedinophyceae	Marsupiomonadales	Marsupiomonadaceae	Marsupiomonas			1
Chlorophyta	Pedinophyceae	Pedinomonadales	Pedinomonadaceae	Pedinomonas			4
Chlorophyta	Trebouxiophyceae	Chlorellales	Chlorellaceae	Auxenochlorella			1
Chlorophyta	Trebouxiophyceae	Chlorellales	Chlorellaceae	Chlorella			11
Chlorophyta	Trebouxiophyceae	Chlorellales	Chlorellaceae	Chlorellaceae_Incertae_sedis			13
Chlorophyta	Trebouxiophyceae	Chlorellales	Chlorellaceae	Chloroidium			2
Chlorophyta	Trebouxiophyceae	Chlorellales	Chlorellaceae	Compactochlorella			1
Chlorophyta	Trebouxiophyceae	Chlorellales	Chlorellaceae	Kalenjinia								1
Chlorophyta	Trebouxiophyceae	Chlorellales	Chlorellaceae	Lobosphaera			1
Chlorophyta	Trebouxiophyceae	Chlorellales	Chlorellaceae	Marvania			1
Chlorophyta	Trebouxiophyceae	Chlorellales	Chlorellaceae	Masaia							1
Chlorophyta	Trebouxiophyceae	Chlorellales	Chlorellaceae	Micractinium			12
Chlorophyta	Trebouxiophyceae	Chlorellales	Chlorellaceae	Prototheca			4
Chlorophyta	Trebouxiophyceae	Chlorellales	Chlorellaceae	Pseudochlorella			2
Chlorophyta	Trebouxiophyceae	Chlorellales	Chlorellales_Incertae_sedis	Parachlorella			2
Chlorophyta	Trebouxiophyceae	Chlorellales	Eremosphaeraceae	Eremosphaera			1
Chlorophyta	Trebouxiophyceae	Chlorellales	Oocystaceae	Coenochloris			7
Chlorophyta	Trebouxiophyceae	Microthamniales	Microthamniales_Incertae_sedis	Asterochloris			21
Chlorophyta	Trebouxiophyceae	Microthamniales	Microthamniales_Incertae_sedis	Dictyochloropsis			2
Chlorophyta	Trebouxiophyceae	Microthamniales	Microthamniales_Incertae_sedis	Elliptochloris			1
Chlorophyta	Trebouxiophyceae	Microthamniales	Microthamniales_Incertae_sedis	Stichococcus			4
Chlorophyta	Trebouxiophyceae	Microthamniales	Microthamniales_Incertae_sedis	Symbiochloris			3
Chlorophyta	Trebouxiophyceae	Microthamniales	Microthamniales_Incertae_sedis	Trebouxia			33				1
Chlorophyta	Trebouxiophyceae	Prasiolales	Koliellaceae	Koliella			2
Chlorophyta	Trebouxiophyceae	Prasiolales	Koliellaceae	Raphidonema			1
Chlorophyta	Trebouxiophyceae	Prasiolales	Prasiolaceae	Prasiola			1
Chlorophyta	Trebouxiophyceae	Trebouxiophyceae_Incertae_sedis	Botryococcaceae	Botryococcus			1
Chlorophyta	Trebouxiophyceae	Trebouxiophyceae_Incertae_sedis	Coccomyxaceae	Coccomyxa			2
Chlorophyta	Trebouxiophyceae	Trebouxiophyceae_Incertae_sedis	Incertae_sedis	Dictyosphaerium			44
Chlorophyta	Trebouxiophyceae	Trebouxiophyceae_Incertae_sedis	Incertae_sedis	Heterochlorella			1
Chlorophyta	Trebouxiophyceae	Trebouxiophyceae_Incertae_sedis	Incertae_sedis	Incertae_sedis			3
Chlorophyta	Trebouxiophyceae	Trebouxiophyceae_Incertae_sedis	Incertae_sedis	Lunachloris			1
Chlorophyta	Trebouxiophyceae	Trebouxiophyceae_Incertae_sedis	Incertae_sedis	Parietochloris			1
Chlorophyta	Trebouxiophyceae	Trebouxiophyceae_Incertae_sedis	Incertae_sedis	Watanabea			1
Chlorophyta	Ulvophyceae	Bryopsidales	Bryopsidaceae	Bryopsis					1
Chlorophyta	Ulvophyceae	Bryopsidales	Caulerpaceae	Caulerpa			14
Chlorophyta	Ulvophyceae	Bryopsidales	Halimedaceae	Halimeda			2
Chlorophyta	Ulvophyceae	Bryopsidales	Udoteaceae	Chlorodesmis			2
Chlorophyta	Ulvophyceae	Bryopsidales	Udoteaceae	Flabellia			1
Chlorophyta	Ulvophyceae	Bryopsidales	Udoteaceae	Penicillus			4
Chlorophyta	Ulvophyceae	Bryopsidales	Udoteaceae	Rhipiliopsis			1
Chlorophyta	Ulvophyceae	Bryopsidales	Udoteaceae	Rhipocephalus			1
Chlorophyta	Ulvophyceae	Bryopsidales	Udoteaceae	Udotea			7
Chlorophyta	Ulvophyceae	Cladophorales	Cladophoraceae	Aegagropila			1
Chlorophyta	Ulvophyceae	Cladophorales	Cladophoraceae	Cladophora			1
Chlorophyta	Ulvophyceae	Cladophorales	Cladophoraceae	Rhizoclonium			1
Chlorophyta	Ulvophyceae	Cladophorales	Pithophoraceae	Wittrockiella			4
Chlorophyta	Ulvophyceae	Ignatiales	Ignatiales_Incertae_sedis	Ignatius			1
Chlorophyta	Ulvophyceae	Trentepohliales	Trentepohliaceae	Cephaleuros			11
Chlorophyta	Ulvophyceae	Trentepohliales	Trentepohliaceae	Phycopeltis			2
Chlorophyta	Ulvophyceae	Trentepohliales	Trentepohliaceae	Printzina			1
Chlorophyta	Ulvophyceae	Trentepohliales	Trentepohliaceae	Trentepohlia			4
Chlorophyta	Ulvophyceae	Ulotrichales	Ulotrichaceae	Acrosiphonia			1
Chlorophyta	Ulvophyceae	Ulvales	Ulvales_Incertae_sedis	Desmochloris			1
Chlorophyta	Ulvophyceae	Ulvales	Ulvellaceae	Ulvella			1
Chlorophyta	Ulvophyceae	Ulvophyceae_Incertae_sedis	Incertae_sedis	Incertae_sedis			2
Chlorophyta	Ulvophyceae	Ulvophyceae_Incertae_sedis	Incertae_sedis	Oltmannsiellopsis			1
Streptophyta	Bryopsida	Bryales	Bryaceae	Bryum	1
Streptophyta	Bryopsida	Dicranales	Calymperaceae	Syrrhopodon	2
Streptophyta	Bryopsida	Dicranales	Dicranaceae	Dicranum	1
Streptophyta	Bryopsida	Dicranales	Leucobryaceae	Brothera	1
Streptophyta	Bryopsida	Dicranales	Leucobryaceae	Dicranodontium	1
Streptophyta	Bryopsida	Dicranales	Leucobryaceae	Leucobryum	14	4
Streptophyta	Bryopsida	Dicranales	Leucobryaceae	Microcampylopus	2
Streptophyta	Bryopsida	Dicranales	Leucobryaceae	Pilopogon			1
Streptophyta	Bryopsida	Funariales	Funariaceae	Funaria	1
Streptophyta	Bryopsida	Funariales	Funariaceae	Physcomitrella	1
Streptophyta	Bryopsida	Hookeriales	Hypopterygiaceae	Hypopterygium		2
Streptophyta	Bryopsida	Hypnales	Amblystegiaceae	Drepanocladus	1
Streptophyta	Bryopsida	Hypnales	Amblystegiaceae	Sarmentypnum	4
Streptophyta	Bryopsida	Hypnales	Amblystegiaceae	Scorpidium	3
Streptophyta	Bryopsida	Hypnales	Brachytheciaceae	Bryhnia	1
Streptophyta	Bryopsida	Hypnales	Brachytheciaceae	Donrichardsia	1
Streptophyta	Bryopsida	Hypnales	Brachytheciaceae	Eurhynchiastrum	1
Streptophyta	Bryopsida	Hypnales	Brachytheciaceae	Eurhynchium	1
Streptophyta	Bryopsida	Hypnales	Brachytheciaceae	Kindbergia	1
Streptophyta	Bryopsida	Hypnales	Brachytheciaceae	Oxyrrhynchium	3
Streptophyta	Bryopsida	Hypnales	Brachytheciaceae	Platyhypnidium	1
Streptophyta	Bryopsida	Hypnales	Brachytheciaceae	Rhynchostegium	4
Streptophyta	Bryopsida	Hypnales	Calliergonaceae	Calliergon	4
Streptophyta	Bryopsida	Hypnales	Calliergonaceae	Hamatocaulis	1
Streptophyta	Bryopsida	Hypnales	Calliergonaceae	Loeskypnum	2
Streptophyta	Bryopsida	Hypnales	Calliergonaceae	Warnstorfia	1
Streptophyta	Bryopsida	Hypnales	Fontinalaceae	Fontinalis	1
Streptophyta	Bryopsida	Hypnales	Hylocomiaceae	Leptocladiella	1
Streptophyta	Bryopsida	Hypnales	Hypnaceae	Buckiella	2
Streptophyta	Bryopsida	Hypnales	Hypnaceae	Phyllodon	1
Streptophyta	Bryopsida	Hypnales	Hypnaceae	Taxiphyllum	1
Streptophyta	Bryopsida	Hypnales	Plagiotheciaceae	Herzogiella	1
Streptophyta	Bryopsida	Hypnales	Plagiotheciaceae	Isopterygiopsis	1
Streptophyta	Bryopsida	Hypnales	Plagiotheciaceae	Plagiothecium	13
Streptophyta	Bryopsida	Hypnales	Plagiotheciaceae	Pseudotaxiphyllum	6
Streptophyta	Bryopsida	Hypnales	Pylaisiadelphaceae	Isopterygium	1
Streptophyta	Bryopsida	Hypnales	Sematophyllaceae	Clastobryophilum	1
Streptophyta	Bryopsida	Hypnales	Sematophyllaceae	Donnellia	1
Streptophyta	Bryopsida	Hypnales	Sematophyllaceae	Sematophyllum	1
Streptophyta	Bryopsida	Pottiales	Pottiaceae	Hyophila	1
Streptophyta	Bryopsida	Pseudoditrichales	Ditrichaceae	Ceratodon	2
Streptophyta	Bryopsida	Rhizogoniales	Aulacomniaceae	Aulacomnium	1
Streptophyta	Charophyceae	Charales	Characeae	Chara		4
Streptophyta	Charophyceae	Charales	Characeae	Lamprothamnium		1
Streptophyta	Charophyceae	Charales	Characeae	Lychnothamnus		1
Streptophyta	Charophyceae	Charales	Characeae	Nitella		5			1
Streptophyta	Charophyceae	Charales	Characeae	Nitellopsis		1
Streptophyta	Charophyceae	Charales	Characeae	Tolypella		11
Streptophyta	Coleochaetophyceae	Coleochaetales	Chaetosphaeridiaceae	Chaetosphaeridium			1
Streptophyta	Coleochaetophyceae	Coleochaetales	Coleochaetaceae	Coleochaete		1
Streptophyta	Jungermanniopsida	Jungermanniales	Adelanthaceae	Adelanthus	4
Streptophyta	Jungermanniopsida	Jungermanniales	Adelanthaceae	Wettsteinia	1
Streptophyta	Jungermanniopsida	Jungermanniales	Anastrophyllaceae	Barbilophozia	1
Streptophyta	Jungermanniopsida	Jungermanniales	Anastrophyllaceae	Sphenolobus	1
Streptophyta	Jungermanniopsida	Jungermanniales	Brevianthaceae	Tetracymbaliella	2
Streptophyta	Jungermanniopsida	Jungermanniales	Cephaloziaceae	Alobiellopsis	1
Streptophyta	Jungermanniopsida	Jungermanniales	Cephaloziaceae	Cephalozia	1
Streptophyta	Jungermanniopsida	Jungermanniales	Cephaloziaceae	Fuscocephaloziopsis	7
Streptophyta	Jungermanniopsida	Jungermanniales	Gymnomitriaceae	Nothogymnomitrion	1
Streptophyta	Jungermanniopsida	Jungermanniales	Jamesoniellaceae	Anomacaulis	1
Streptophyta	Jungermanniopsida	Jungermanniales	Jamesoniellaceae	Cuspidatula	2
Streptophyta	Jungermanniopsida	Jungermanniales	Jungermanniaceae	Cryptochila	2
Streptophyta	Jungermanniopsida	Jungermanniales	Jungermanniaceae	Jamesoniella	4
Streptophyta	Jungermanniopsida	Jungermanniales	Jungermanniaceae	Mesoptychia	2
Streptophyta	Jungermanniopsida	Jungermanniales	Jungermanniaceae	Syzygiella	11				1
Streptophyta	Jungermanniopsida	Jungermanniales	Lepidoziaceae	Telaranea	1
Streptophyta	Jungermanniopsida	Jungermanniales	Lepidoziaceae	Tricholepidozia	2
Streptophyta	Jungermanniopsida	Jungermanniales	Plagiochilaceae	Chiastocaulon	2
Streptophyta	Jungermanniopsida	Jungermanniales	Plagiochilaceae	Dinckleria	1
Streptophyta	Jungermanniopsida	Jungermanniales	Plagiochilaceae	Plagiochila	20				1
Streptophyta	Jungermanniopsida	Jungermanniales	Scapaniaceae	Scapania	1				1
Streptophyta	Jungermanniopsida	Metzgeriales	Aneuraceae	Aneura	3
Streptophyta	Jungermanniopsida	Metzgeriales	Metzgeriaceae	Metzgeria	5
Streptophyta	Jungermanniopsida	Pelliales	Pelliaceae	Pellia	1
Streptophyta	Jungermanniopsida	Porellales	Frullaniaceae	Frullania	131
Streptophyta	Jungermanniopsida	Porellales	Jubulaceae	Neohattoria	1
Streptophyta	Jungermanniopsida	Porellales	Lejeuneaceae	Acrolejeunea	3
Streptophyta	Jungermanniopsida	Porellales	Lejeuneaceae	Allorgella	1
Streptophyta	Jungermanniopsida	Porellales	Lejeuneaceae	Aureolejeunea	4
Streptophyta	Jungermanniopsida	Porellales	Lejeuneaceae	Brachiolejeunea	1
Streptophyta	Jungermanniopsida	Porellales	Lejeuneaceae	Bromeliophila	1
Streptophyta	Jungermanniopsida	Porellales	Lejeuneaceae	Cheilolejeunea	32	1
Streptophyta	Jungermanniopsida	Porellales	Lejeuneaceae	Colura	7
Streptophyta	Jungermanniopsida	Porellales	Lejeuneaceae	Cyclolejeunea	6
Streptophyta	Jungermanniopsida	Porellales	Lejeuneaceae	Diplasiolejeunea	37
Streptophyta	Jungermanniopsida	Porellales	Lejeuneaceae	Drepanolejeunea	8
Streptophyta	Jungermanniopsida	Porellales	Lejeuneaceae	Echinolejeunea	1
Streptophyta	Jungermanniopsida	Porellales	Lejeuneaceae	Evansiolejeunea	1
Streptophyta	Jungermanniopsida	Porellales	Lejeuneaceae	Haplolejeunea	2
Streptophyta	Jungermanniopsida	Porellales	Lejeuneaceae	Harpalejeunea	10
Streptophyta	Jungermanniopsida	Porellales	Lejeuneaceae	Lejeunea	82	1
Streptophyta	Jungermanniopsida	Porellales	Lejeuneaceae	Lepidolejeunea	1
Streptophyta	Jungermanniopsida	Porellales	Lejeuneaceae	Leptolejeunea	15
Streptophyta	Jungermanniopsida	Porellales	Lejeuneaceae	Leucolejeunea	4
Streptophyta	Jungermanniopsida	Porellales	Lejeuneaceae	Marchesinia	6
Streptophyta	Jungermanniopsida	Porellales	Lejeuneaceae	Metalejeunea	2
Streptophyta	Jungermanniopsida	Porellales	Lejeuneaceae	Microlejeunea	11
Streptophyta	Jungermanniopsida	Porellales	Lejeuneaceae	Omphalanthus	2
Streptophyta	Jungermanniopsida	Porellales	Lejeuneaceae	Oryzolejeunea	1
Streptophyta	Jungermanniopsida	Porellales	Lejeuneaceae	Otolejeunea	1
Streptophyta	Jungermanniopsida	Porellales	Lejeuneaceae	Pictolejeunea	1
Streptophyta	Jungermanniopsida	Porellales	Lejeuneaceae	Pluvianthus	1
Streptophyta	Jungermanniopsida	Porellales	Lejeuneaceae	Prionolejeunea	3
Streptophyta	Jungermanniopsida	Porellales	Lejeuneaceae	Ptychanthus	1
Streptophyta	Jungermanniopsida	Porellales	Lejeuneaceae	Rectolejeunea	1
Streptophyta	Jungermanniopsida	Porellales	Lejeuneaceae	Tuzibeanthus	1
Streptophyta	Jungermanniopsida	Porellales	Lejeuneaceae	Vitalianthus	2
Streptophyta	Jungermanniopsida	Porellales	Lejeuneaceae	Xylolejeunea	1
Streptophyta	Jungermanniopsida	Porellales	Porellaceae	Ascidiota	1
Streptophyta	Jungermanniopsida	Porellales	Porellaceae	Porella	6
Streptophyta	Klebsormidiophyceae	Klebsormidiales	Klebsormidiaceae	Interfilum		6
Streptophyta	Klebsormidiophyceae	Klebsormidiales	Klebsormidiaceae	Klebsormidium		9
Streptophyta	Klebsormidiophyceae	Klebsormidiales	Klebsormidiales_Incertae_sedis	Hormidiella		1
Streptophyta	Liliopsida	Acorales	Acoraceae	Acorus	7								1
Streptophyta	Liliopsida	Alismatales	Alismataceae	Alisma	3
Streptophyta	Liliopsida	Alismatales	Alismataceae	Caldesia	1
Streptophyta	Liliopsida	Alismatales	Alismataceae	Luronium	1
Streptophyta	Liliopsida	Alismatales	Araceae	Adelonema	7				1
Streptophyta	Liliopsida	Alismatales	Araceae	Homalomena				1
Streptophyta	Liliopsida	Alismatales	Araceae	Landoltia	1
Streptophyta	Liliopsida	Alismatales	Araceae	Lemna	10
Streptophyta	Liliopsida	Alismatales	Araceae	Wolffia	8
Streptophyta	Liliopsida	Alismatales	Araceae	Wolffiella	3
Streptophyta	Liliopsida	Alismatales	Hydrocharitaceae	Egeria	1	1
Streptophyta	Liliopsida	Alismatales	Hydrocharitaceae	Elodea	1
Streptophyta	Liliopsida	Alismatales	Hydrocharitaceae	Najas	3
Streptophyta	Liliopsida	Alismatales	Hydrocharitaceae	Vallisneria	1
Streptophyta	Liliopsida	Alismatales	Potamogetonaceae	Groenlandia	1
Streptophyta	Liliopsida	Alismatales	Potamogetonaceae	Potamogeton	16
Streptophyta	Liliopsida	Alismatales	Potamogetonaceae	Stuckenia	1
Streptophyta	Liliopsida	Alismatales	Potamogetonaceae	Zannichellia		1
Streptophyta	Liliopsida	Alismatales	Tofieldiaceae	Pleea	1
Streptophyta	Liliopsida	Alismatales	Tofieldiaceae	Tofieldia	1
Streptophyta	Liliopsida	Alismatales	Tofieldiaceae	Triantha	1
Streptophyta	Liliopsida	Arecales	Arecaceae	Actinorhytis				1
Streptophyta	Liliopsida	Arecales	Arecaceae	Adonidia				2
Streptophyta	Liliopsida	Arecales	Arecaceae	Archontophoenix				4
Streptophyta	Liliopsida	Arecales	Arecaceae	Arecaceae_Incertae_sedis				1
Streptophyta	Liliopsida	Arecales	Arecaceae	Arenga				15
Streptophyta	Liliopsida	Arecales	Arecaceae	Balaka				5
Streptophyta	Liliopsida	Arecales	Arecaceae	Basselinia				2
Streptophyta	Liliopsida	Arecales	Arecaceae	Brassiophoenix				2
Streptophyta	Liliopsida	Arecales	Arecaceae	Calamus				38
Streptophyta	Liliopsida	Arecales	Arecaceae	Calyptrocalyx				1
Streptophyta	Liliopsida	Arecales	Arecaceae	Carpentaria				1
Streptophyta	Liliopsida	Arecales	Arecaceae	Carpoxylon				1
Streptophyta	Liliopsida	Arecales	Arecaceae	Caryota				2
Streptophyta	Liliopsida	Arecales	Arecaceae	Chambeyronia				1
Streptophyta	Liliopsida	Arecales	Arecaceae	Daemonorops				6
Streptophyta	Liliopsida	Arecales	Arecaceae	Drymophloeus				2
Streptophyta	Liliopsida	Arecales	Arecaceae	Howea				1
Streptophyta	Liliopsida	Arecales	Arecaceae	Kentiopsis				2
Streptophyta	Liliopsida	Arecales	Arecaceae	Korthalsia				2
Streptophyta	Liliopsida	Arecales	Arecaceae	Linospadix				1
Streptophyta	Liliopsida	Arecales	Arecaceae	Normanbya				1
Streptophyta	Liliopsida	Arecales	Arecaceae	Plectocomia				1
Streptophyta	Liliopsida	Arecales	Arecaceae	Ponapea				1
Streptophyta	Liliopsida	Arecales	Arecaceae	Ptychococcus				2
Streptophyta	Liliopsida	Arecales	Arecaceae	Ptychosperma				13
Streptophyta	Liliopsida	Arecales	Arecaceae	Rhopalostylis				1
Streptophyta	Liliopsida	Arecales	Arecaceae	Sabal				4
Streptophyta	Liliopsida	Arecales	Arecaceae	Solfia				1
Streptophyta	Liliopsida	Arecales	Arecaceae	Veitchia				8
Streptophyta	Liliopsida	Arecales	Arecaceae	Wallichia				4
Streptophyta	Liliopsida	Arecales	Arecaceae	Wodyetia				1
Streptophyta	Liliopsida	Asparagales	Amaryllidaceae	Allium	16
Streptophyta	Liliopsida	Asparagales	Amaryllidaceae	Ammocharis	2
Streptophyta	Liliopsida	Asparagales	Amaryllidaceae	Beauverdia				1
Streptophyta	Liliopsida	Asparagales	Amaryllidaceae	Crinum	27
Streptophyta	Liliopsida	Asparagales	Amaryllidaceae	Gethyllis	1
Streptophyta	Liliopsida	Asparagales	Amaryllidaceae	Gilliesia				1
Streptophyta	Liliopsida	Asparagales	Amaryllidaceae	Leucocoryne				2	1
Streptophyta	Liliopsida	Asparagales	Amaryllidaceae	Lycoris	1
Streptophyta	Liliopsida	Asparagales	Amaryllidaceae	Narcissus	6
Streptophyta	Liliopsida	Asparagales	Amaryllidaceae	Nothoscordum				3				1
Streptophyta	Liliopsida	Asparagales	Amaryllidaceae	Tristagma	1			3	2
Streptophyta	Liliopsida	Asparagales	Amaryllidaceae	Zephyranthes	1
Streptophyta	Liliopsida	Asparagales	Asparagaceae	Asparagus	2
Streptophyta	Liliopsida	Asparagales	Asparagaceae	Chlorophytum	7						1
Streptophyta	Liliopsida	Asparagales	Asparagaceae	Dracaena				1
Streptophyta	Liliopsida	Asparagales	Asparagaceae	Maianthemum				1
Streptophyta	Liliopsida	Asparagales	Asparagaceae	Polygonatum	1
Streptophyta	Liliopsida	Asparagales	Asphodelaceae	Asphodelus				1
Streptophyta	Liliopsida	Asparagales	Asphodelaceae	Bulbine				1
Streptophyta	Liliopsida	Asparagales	Asphodelaceae	Bulbinella	1
Streptophyta	Liliopsida	Asparagales	Asphodelaceae	Kniphofia	52
Streptophyta	Liliopsida	Asparagales	Hyacinthaceae	Bellevalia				1
Streptophyta	Liliopsida	Asparagales	Hyacinthaceae	Dipcadi	1
Streptophyta	Liliopsida	Asparagales	Iridaceae	Crocus	1
Streptophyta	Liliopsida	Asparagales	Iridaceae	Iris	8	1		2
Streptophyta	Liliopsida	Asparagales	Iridaceae	Moraea	1
Streptophyta	Liliopsida	Asparagales	Orchidaceae	Acianthera	3
Streptophyta	Liliopsida	Asparagales	Orchidaceae	Acineta	1
Streptophyta	Liliopsida	Asparagales	Orchidaceae	Aerides	18
Streptophyta	Liliopsida	Asparagales	Orchidaceae	Anacamptis	1
Streptophyta	Liliopsida	Asparagales	Orchidaceae	Anathallis	19
Streptophyta	Liliopsida	Asparagales	Orchidaceae	Ancistrorhynchus	1
Streptophyta	Liliopsida	Asparagales	Orchidaceae	Andinia	4
Streptophyta	Liliopsida	Asparagales	Orchidaceae	Anguloa	1
Streptophyta	Liliopsida	Asparagales	Orchidaceae	Apostasia	5
Streptophyta	Liliopsida	Asparagales	Orchidaceae	Batemannia	1
Streptophyta	Liliopsida	Asparagales	Orchidaceae	Benzingia	1
Streptophyta	Liliopsida	Asparagales	Orchidaceae	Bifrenaria	12
Streptophyta	Liliopsida	Asparagales	Orchidaceae	Bletilla	3
Streptophyta	Liliopsida	Asparagales	Orchidaceae	Braemia	1
Streptophyta	Liliopsida	Asparagales	Orchidaceae	Brassia	4
Streptophyta	Liliopsida	Asparagales	Orchidaceae	Bromheadia	1
Streptophyta	Liliopsida	Asparagales	Orchidaceae	Brownleea	1
Streptophyta	Liliopsida	Asparagales	Orchidaceae	Camaridium	1
Streptophyta	Liliopsida	Asparagales	Orchidaceae	Catasetum	3
Streptophyta	Liliopsida	Asparagales	Orchidaceae	Cephalanthera	3
Streptophyta	Liliopsida	Asparagales	Orchidaceae	Chaubardia	1
Streptophyta	Liliopsida	Asparagales	Orchidaceae	Chiloschista	1
Streptophyta	Liliopsida	Asparagales	Orchidaceae	Christensonella	1
Streptophyta	Liliopsida	Asparagales	Orchidaceae	Cirrhaea	1
Streptophyta	Liliopsida	Asparagales	Orchidaceae	Cischweinfia	1
Streptophyta	Liliopsida	Asparagales	Orchidaceae	Cleistes	2
Streptophyta	Liliopsida	Asparagales	Orchidaceae	Clowesia	1
Streptophyta	Liliopsida	Asparagales	Orchidaceae	Coeliopsis	1
Streptophyta	Liliopsida	Asparagales	Orchidaceae	Coelogyne	2
Streptophyta	Liliopsida	Asparagales	Orchidaceae	Collabium	1
Streptophyta	Liliopsida	Asparagales	Orchidaceae	Corallorhiza	8
Streptophyta	Liliopsida	Asparagales	Orchidaceae	Coryanthes	3
Streptophyta	Liliopsida	Asparagales	Orchidaceae	Crepidium	4
Streptophyta	Liliopsida	Asparagales	Orchidaceae	Cryptarrhena	1
Streptophyta	Liliopsida	Asparagales	Orchidaceae	Cuitlauzina	1
Streptophyta	Liliopsida	Asparagales	Orchidaceae	Cycnoches				1
Streptophyta	Liliopsida	Asparagales	Orchidaceae	Cymbidium	5
Streptophyta	Liliopsida	Asparagales	Orchidaceae	Cypripedium	1
Streptophyta	Liliopsida	Asparagales	Orchidaceae	Cyrtochilum	1
Streptophyta	Liliopsida	Asparagales	Orchidaceae	Dactylorhiza	6
Streptophyta	Liliopsida	Asparagales	Orchidaceae	Dendrobium	173	1
Streptophyta	Liliopsida	Asparagales	Orchidaceae	Dichaea	2	1
Streptophyta	Liliopsida	Asparagales	Orchidaceae	Dimorphorchis	1
Streptophyta	Liliopsida	Asparagales	Orchidaceae	Disa	124	1
Streptophyta	Liliopsida	Asparagales	Orchidaceae	Disperis	4
Streptophyta	Liliopsida	Asparagales	Orchidaceae	Dracontia	1
Streptophyta	Liliopsida	Asparagales	Orchidaceae	Dressleria	1
Streptophyta	Liliopsida	Asparagales	Orchidaceae	Dryadella	1
Streptophyta	Liliopsida	Asparagales	Orchidaceae	Echinosepala	8
Streptophyta	Liliopsida	Asparagales	Orchidaceae	Embreea	1
Streptophyta	Liliopsida	Asparagales	Orchidaceae	Encyclia	16
Streptophyta	Liliopsida	Asparagales	Orchidaceae	Epipactis	4
Streptophyta	Liliopsida	Asparagales	Orchidaceae	Eriopsis	1
Streptophyta	Liliopsida	Asparagales	Orchidaceae	Eulophia	1
Streptophyta	Liliopsida	Asparagales	Orchidaceae	Galeandra	1
Streptophyta	Liliopsida	Asparagales	Orchidaceae	Gastrodia	1
Streptophyta	Liliopsida	Asparagales	Orchidaceae	Gongora	6
Streptophyta	Liliopsida	Asparagales	Orchidaceae	Gymnadenia	1
Streptophyta	Liliopsida	Asparagales	Orchidaceae	Heterotaxis	2
Streptophyta	Liliopsida	Asparagales	Orchidaceae	Hexalectris	3
Streptophyta	Liliopsida	Asparagales	Orchidaceae	Holcoglossum	2
Streptophyta	Liliopsida	Asparagales	Orchidaceae	Horichia	1
Streptophyta	Liliopsida	Asparagales	Orchidaceae	Houlletia	2
Streptophyta	Liliopsida	Asparagales	Orchidaceae	Inti	1
Streptophyta	Liliopsida	Asparagales	Orchidaceae	Jacquiniella	1
Streptophyta	Liliopsida	Asparagales	Orchidaceae	Kefersteinia	1
Streptophyta	Liliopsida	Asparagales	Orchidaceae	Kegeliella	2
Streptophyta	Liliopsida	Asparagales	Orchidaceae	Koellensteinia	1
Streptophyta	Liliopsida	Asparagales	Orchidaceae	Lacaena	1
Streptophyta	Liliopsida	Asparagales	Orchidaceae	Laelia	15
Streptophyta	Liliopsida	Asparagales	Orchidaceae	Lockhartia	1
Streptophyta	Liliopsida	Asparagales	Orchidaceae	Lueddemannia	1
Streptophyta	Liliopsida	Asparagales	Orchidaceae	Luisia	1
Streptophyta	Liliopsida	Asparagales	Orchidaceae	Lycaste	1
Streptophyta	Liliopsida	Asparagales	Orchidaceae	Lycomormium	1
Streptophyta	Liliopsida	Asparagales	Orchidaceae	Maxillaria	11
Streptophyta	Liliopsida	Asparagales	Orchidaceae	Miltonia	1
Streptophyta	Liliopsida	Asparagales	Orchidaceae	Muscarella	2
Streptophyta	Liliopsida	Asparagales	Orchidaceae	Myoxanthus	1
Streptophyta	Liliopsida	Asparagales	Orchidaceae	Neofinetia	1
Streptophyta	Liliopsida	Asparagales	Orchidaceae	Neomoorea	1
Streptophyta	Liliopsida	Asparagales	Orchidaceae	Neottia	1
Streptophyta	Liliopsida	Asparagales	Orchidaceae	Nervilia	1
Streptophyta	Liliopsida	Asparagales	Orchidaceae	Neuwiedia	3
Streptophyta	Liliopsida	Asparagales	Orchidaceae	Oncidium	1
Streptophyta	Liliopsida	Asparagales	Orchidaceae	Ophrys	1
Streptophyta	Liliopsida	Asparagales	Orchidaceae	Orchidaceae_Incertae_sedis	8
Streptophyta	Liliopsida	Asparagales	Orchidaceae	Orchis	1
Streptophyta	Liliopsida	Asparagales	Orchidaceae	Ornithidium	1
Streptophyta	Liliopsida	Asparagales	Orchidaceae	Ornithocephalus	1
Streptophyta	Liliopsida	Asparagales	Orchidaceae	Pabstiella	3
Streptophyta	Liliopsida	Asparagales	Orchidaceae	Paphinia	2
Streptophyta	Liliopsida	Asparagales	Orchidaceae	Papilionanthe	1
Streptophyta	Liliopsida	Asparagales	Orchidaceae	Paraphalaenopsis	1
Streptophyta	Liliopsida	Asparagales	Orchidaceae	Peristeria	2
Streptophyta	Liliopsida	Asparagales	Orchidaceae	Pescatoria	1
Streptophyta	Liliopsida	Asparagales	Orchidaceae	Phalaenopsis	5	1
Streptophyta	Liliopsida	Asparagales	Orchidaceae	Phloeophila	4
Streptophyta	Liliopsida	Asparagales	Orchidaceae	Pholidota	2
Streptophyta	Liliopsida	Asparagales	Orchidaceae	Platanthera	2
Streptophyta	Liliopsida	Asparagales	Orchidaceae	Platystele	16
Streptophyta	Liliopsida	Asparagales	Orchidaceae	Pleurothallis	3
Streptophyta	Liliopsida	Asparagales	Orchidaceae	Pogoniopsis	1
Streptophyta	Liliopsida	Asparagales	Orchidaceae	Polycycnis	3
Streptophyta	Liliopsida	Asparagales	Orchidaceae	Polystachya	11
Streptophyta	Liliopsida	Asparagales	Orchidaceae	Pomatocalpa	2
Streptophyta	Liliopsida	Asparagales	Orchidaceae	Psychopsis	1
Streptophyta	Liliopsida	Asparagales	Orchidaceae	Rhizanthella	1
Streptophyta	Liliopsida	Asparagales	Orchidaceae	Rhynchostylis	1
Streptophyta	Liliopsida	Asparagales	Orchidaceae	Rudolfiella	1
Streptophyta	Liliopsida	Asparagales	Orchidaceae	Scaphosepalum	7
Streptophyta	Liliopsida	Asparagales	Orchidaceae	Schlimmia	2
Streptophyta	Liliopsida	Asparagales	Orchidaceae	Scuticaria	1
Streptophyta	Liliopsida	Asparagales	Orchidaceae	Seidenfadenia	1
Streptophyta	Liliopsida	Asparagales	Orchidaceae	Sievekingia	3
Streptophyta	Liliopsida	Asparagales	Orchidaceae	Smitinandia	1
Streptophyta	Liliopsida	Asparagales	Orchidaceae	Sobralia	1
Streptophyta	Liliopsida	Asparagales	Orchidaceae	Soterosanthus	1
Streptophyta	Liliopsida	Asparagales	Orchidaceae	Spathoglottis	1
Streptophyta	Liliopsida	Asparagales	Orchidaceae	Specklinia	55
Streptophyta	Liliopsida	Asparagales	Orchidaceae	Stanhopea	10
Streptophyta	Liliopsida	Asparagales	Orchidaceae	Stelis	23
Streptophyta	Liliopsida	Asparagales	Orchidaceae	Stereochilus	1
Streptophyta	Liliopsida	Asparagales	Orchidaceae	Telipogon	2
Streptophyta	Liliopsida	Asparagales	Orchidaceae	Thrixspermum	19
Streptophyta	Liliopsida	Asparagales	Orchidaceae	Trevoria	1
Streptophyta	Liliopsida	Asparagales	Orchidaceae	Trichocentrum	3
Streptophyta	Liliopsida	Asparagales	Orchidaceae	Trichopilia	1
Streptophyta	Liliopsida	Asparagales	Orchidaceae	Vanda	6
Streptophyta	Liliopsida	Asparagales	Orchidaceae	Vandopsis	2
Streptophyta	Liliopsida	Asparagales	Orchidaceae	Vasqueziella	1
Streptophyta	Liliopsida	Asparagales	Orchidaceae	Warrea	1
Streptophyta	Liliopsida	Asparagales	Orchidaceae	Xylobium	3
Streptophyta	Liliopsida	Asparagales	Orchidaceae	Zygopetalum	1
Streptophyta	Liliopsida	Commelinales	Hanguanaceae	Hanguana		2
Streptophyta	Liliopsida	Dioscoreales	Dioscoreaceae	Dioscorea	3			1
Streptophyta	Liliopsida	Liliales	Campynemataceae	Campynema	1
Streptophyta	Liliopsida	Liliales	Corsiaceae	Arachnitis	2
Streptophyta	Liliopsida	Liliales	Liliaceae	Fritillaria	4	3
Streptophyta	Liliopsida	Liliales	Liliaceae	Gagea	3
Streptophyta	Liliopsida	Liliales	Liliaceae	Lilium	16
Streptophyta	Liliopsida	Liliales	Liliaceae	Tulipa	2
Streptophyta	Liliopsida	Liliales	Melanthiaceae	Veratrum	13
Streptophyta	Liliopsida	Liliales	Philesiaceae	Philesia	1
Streptophyta	Liliopsida	Liliales	Ripogonaceae	Ripogonum	3
Streptophyta	Liliopsida	Liliales	Smilacaceae	Heterosmilax	6
Streptophyta	Liliopsida	Liliales	Smilacaceae	Lapageria	1
Streptophyta	Liliopsida	Liliales	Smilacaceae	Smilax	103			1
Streptophyta	Liliopsida	Poales	Cyperaceae	Bolboschoenus	1
Streptophyta	Liliopsida	Poales	Cyperaceae	Carex	2
Streptophyta	Liliopsida	Poales	Cyperaceae	Cyperus	1
Streptophyta	Liliopsida	Poales	Cyperaceae	Eleocharis	5
Streptophyta	Liliopsida	Poales	Cyperaceae	Isolepis	3
Streptophyta	Liliopsida	Poales	Cyperaceae	Rhynchospora	1
Streptophyta	Liliopsida	Poales	Cyperaceae	Schoenoplectus	1
Streptophyta	Liliopsida	Poales	Cyperaceae	Scirpoides	1
Streptophyta	Liliopsida	Poales	Cyperaceae	Scirpus	1
Streptophyta	Liliopsida	Poales	Cyperaceae	Trichophorum	1
Streptophyta	Liliopsida	Poales	Juncaceae	Juncus	25
Streptophyta	Liliopsida	Poales	Juncaceae	Luzula	8
Streptophyta	Liliopsida	Poales	Mayacaceae	Mayaca		1
Streptophyta	Liliopsida	Poales	Poaceae	Achnatherum	1
Streptophyta	Liliopsida	Poales	Poaceae	Aegilops	7
Streptophyta	Liliopsida	Poales	Poaceae	Agrostis		2
Streptophyta	Liliopsida	Poales	Poaceae	Aira	1
Streptophyta	Liliopsida	Poales	Poaceae	Alloteropsis	1
Streptophyta	Liliopsida	Poales	Poaceae	Alopecurus		1
Streptophyta	Liliopsida	Poales	Poaceae	Amelichloa	1
Streptophyta	Liliopsida	Poales	Poaceae	Anatherostipa	1
Streptophyta	Liliopsida	Poales	Poaceae	Aniselytron	1
Streptophyta	Liliopsida	Poales	Poaceae	Anthoxanthum		1
Streptophyta	Liliopsida	Poales	Poaceae	Apera	2
Streptophyta	Liliopsida	Poales	Poaceae	Aphanelytrum		2
Streptophyta	Liliopsida	Poales	Poaceae	Apochloa	1
Streptophyta	Liliopsida	Poales	Poaceae	Arctagrostis	1
Streptophyta	Liliopsida	Poales	Poaceae	Arctopoa	2
Streptophyta	Liliopsida	Poales	Poaceae	Austrostipa	22
Streptophyta	Liliopsida	Poales	Poaceae	Avena		3
Streptophyta	Liliopsida	Poales	Poaceae	Avenella	1
Streptophyta	Liliopsida	Poales	Poaceae	Bouteloua		1
Streptophyta	Liliopsida	Poales	Poaceae	Brachypodium	3
Streptophyta	Liliopsida	Poales	Poaceae	Briza		2
Streptophyta	Liliopsida	Poales	Poaceae	Bromopsis	1
Streptophyta	Liliopsida	Poales	Poaceae	Bromus	9
Streptophyta	Liliopsida	Poales	Poaceae	Calamagrostis		4
Streptophyta	Liliopsida	Poales	Poaceae	Catabrosa		1
Streptophyta	Liliopsida	Poales	Poaceae	Catabrosella	1
Streptophyta	Liliopsida	Poales	Poaceae	Catapodium		2
Streptophyta	Liliopsida	Poales	Poaceae	Celtica	1
Streptophyta	Liliopsida	Poales	Poaceae	Cenchrus	4	1							1
Streptophyta	Liliopsida	Poales	Poaceae	Chloris		3
Streptophyta	Liliopsida	Poales	Poaceae	Chrysopogon	1
Streptophyta	Liliopsida	Poales	Poaceae	Chusquea	43	1
Streptophyta	Liliopsida	Poales	Poaceae	Cinna	1
Streptophyta	Liliopsida	Poales	Poaceae	Coleataenia	2
Streptophyta	Liliopsida	Poales	Poaceae	Corynephorus	1
Streptophyta	Liliopsida	Poales	Poaceae	Cryptochloa	1
Streptophyta	Liliopsida	Poales	Poaceae	Cutandia		2
Streptophyta	Liliopsida	Poales	Poaceae	Cynodon		1
Streptophyta	Liliopsida	Poales	Poaceae	Cynosurus		2
Streptophyta	Liliopsida	Poales	Poaceae	Dactylis		1
Streptophyta	Liliopsida	Poales	Poaceae	Danthonia		1
Streptophyta	Liliopsida	Poales	Poaceae	Deschampsia	1
Streptophyta	Liliopsida	Poales	Poaceae	Deyeuxia	1	3
Streptophyta	Liliopsida	Poales	Poaceae	Dichanthium	1
Streptophyta	Liliopsida	Poales	Poaceae	Digitaria	3
Streptophyta	Liliopsida	Poales	Poaceae	Dryopoa	1
Streptophyta	Liliopsida	Poales	Poaceae	Dupontia	1
Streptophyta	Liliopsida	Poales	Poaceae	Echinochloa	2
Streptophyta	Liliopsida	Poales	Poaceae	Echinolaena	2
Streptophyta	Liliopsida	Poales	Poaceae	Elymus	3
Streptophyta	Liliopsida	Poales	Poaceae	Eragrostis	3
Streptophyta	Liliopsida	Poales	Poaceae	Eriachne	4
Streptophyta	Liliopsida	Poales	Poaceae	Festuca		15
Streptophyta	Liliopsida	Poales	Poaceae	Gaudinia		1
Streptophyta	Liliopsida	Poales	Poaceae	Glyceria	4
Streptophyta	Liliopsida	Poales	Poaceae	Hainardia		1
Streptophyta	Liliopsida	Poales	Poaceae	Helictochloa	1
Streptophyta	Liliopsida	Poales	Poaceae	Hildaea	5
Streptophyta	Liliopsida	Poales	Poaceae	Holcus	2
Streptophyta	Liliopsida	Poales	Poaceae	Homopholis	1
Streptophyta	Liliopsida	Poales	Poaceae	Hookerochloa	2
Streptophyta	Liliopsida	Poales	Poaceae	Hordeum	4
Streptophyta	Liliopsida	Poales	Poaceae	Hyalopoa	1
Streptophyta	Liliopsida	Poales	Poaceae	Hymenachne	1
Streptophyta	Liliopsida	Poales	Poaceae	Ichnanthus	23
Streptophyta	Liliopsida	Poales	Poaceae	Imperata	1
Streptophyta	Liliopsida	Poales	Poaceae	Jarava	2
Streptophyta	Liliopsida	Poales	Poaceae	Koeleria		2
Streptophyta	Liliopsida	Poales	Poaceae	Lamarckia		1
Streptophyta	Liliopsida	Poales	Poaceae	Lecomtella	1
Streptophyta	Liliopsida	Poales	Poaceae	Lolium		4
Streptophyta	Liliopsida	Poales	Poaceae	Megathyrsus	1
Streptophyta	Liliopsida	Poales	Poaceae	Melica	2
Streptophyta	Liliopsida	Poales	Poaceae	Melinis	1
Streptophyta	Liliopsida	Poales	Poaceae	Mibora		1
Streptophyta	Liliopsida	Poales	Poaceae	Microstegium	1
Streptophyta	Liliopsida	Poales	Poaceae	Molinia	1
Streptophyta	Liliopsida	Poales	Poaceae	Nardus	1
Streptophyta	Liliopsida	Poales	Poaceae	Nassella	13
Streptophyta	Liliopsida	Poales	Poaceae	Nastus	1
Streptophyta	Liliopsida	Poales	Poaceae	Nicoraepoa	2
Streptophyta	Liliopsida	Poales	Poaceae	Ocellochloa	1
Streptophyta	Liliopsida	Poales	Poaceae	Oedochloa	5
Streptophyta	Liliopsida	Poales	Poaceae	Oloptum	1
Streptophyta	Liliopsida	Poales	Poaceae	Oplismenus	1
Streptophyta	Liliopsida	Poales	Poaceae	Orthoclada	1
Streptophyta	Liliopsida	Poales	Poaceae	Oryza	9
Streptophyta	Liliopsida	Poales	Poaceae	Otatea		1
Streptophyta	Liliopsida	Poales	Poaceae	Ottochloa	1
Streptophyta	Liliopsida	Poales	Poaceae	Panicum	27
Streptophyta	Liliopsida	Poales	Poaceae	Parapholis		2
Streptophyta	Liliopsida	Poales	Poaceae	Paspalum	1
Streptophyta	Liliopsida	Poales	Poaceae	Pharus	1
Streptophyta	Liliopsida	Poales	Poaceae	Phleum	3
Streptophyta	Liliopsida	Poales	Poaceae	Phragmites	2
Streptophyta	Liliopsida	Poales	Poaceae	Piptochaetium	1
Streptophyta	Liliopsida	Poales	Poaceae	Piresia	1
Streptophyta	Liliopsida	Poales	Poaceae	Poa	5	52
Streptophyta	Liliopsida	Poales	Poaceae	Pseudechinolaena	1
Streptophyta	Liliopsida	Poales	Poaceae	Puccinellia	7
Streptophyta	Liliopsida	Poales	Poaceae	Raddiella	1
Streptophyta	Liliopsida	Poales	Poaceae	Renvoizea	1
Streptophyta	Liliopsida	Poales	Poaceae	Rostraria		2
Streptophyta	Liliopsida	Poales	Poaceae	Rugoloa	1
Streptophyta	Liliopsida	Poales	Poaceae	Sartidia	3
Streptophyta	Liliopsida	Poales	Poaceae	Schismus		2
Streptophyta	Liliopsida	Poales	Poaceae	Schizachyrium	1
Streptophyta	Liliopsida	Poales	Poaceae	Sclerochloa	1
Streptophyta	Liliopsida	Poales	Poaceae	Secale	1
Streptophyta	Liliopsida	Poales	Poaceae	Sphenopus		1
Streptophyta	Liliopsida	Poales	Poaceae	Sporobolus		2
Streptophyta	Liliopsida	Poales	Poaceae	Steinchisma	2
Streptophyta	Liliopsida	Poales	Poaceae	Stipa	3
Streptophyta	Liliopsida	Poales	Poaceae	Stipagrostis	2
Streptophyta	Liliopsida	Poales	Poaceae	Streptostachys	1
Streptophyta	Liliopsida	Poales	Poaceae	Sylvipoa	1
Streptophyta	Liliopsida	Poales	Poaceae	Tenaxia		3
Streptophyta	Liliopsida	Poales	Poaceae	Triodia		1
Streptophyta	Liliopsida	Poales	Poaceae	Trisetum		1
Streptophyta	Liliopsida	Poales	Poaceae	Triticum	6
Streptophyta	Liliopsida	Poales	Poaceae	Vahlodea	1
Streptophyta	Liliopsida	Poales	Poaceae	Yakirra	4
Streptophyta	Liliopsida	Poales	Poaceae	Zeugites	5
Streptophyta	Liliopsida	Poales	Poaceae	Zuloagaea	1
Streptophyta	Liliopsida	Zingiberales	Cannaceae	Canna	1
Streptophyta	Liliopsida	Zingiberales	Costaceae	Cheilocostus	1
Streptophyta	Liliopsida	Zingiberales	Costaceae	Costus	3
Streptophyta	Liliopsida	Zingiberales	Costaceae	Hellenia	1
Streptophyta	Liliopsida	Zingiberales	Heliconiaceae	Heliconia	46	1
Streptophyta	Liliopsida	Zingiberales	Lowiaceae	Orchidantha	14
Streptophyta	Liliopsida	Zingiberales	Marantaceae	Calathea	12
Streptophyta	Liliopsida	Zingiberales	Marantaceae	Ctenanthe	2
Streptophyta	Liliopsida	Zingiberales	Marantaceae	Donax	1
Streptophyta	Liliopsida	Zingiberales	Marantaceae	Goeppertia	36
Streptophyta	Liliopsida	Zingiberales	Marantaceae	Halopegia	2
Streptophyta	Liliopsida	Zingiberales	Marantaceae	Haumania	1
Streptophyta	Liliopsida	Zingiberales	Marantaceae	Hypselodelphys	2
Streptophyta	Liliopsida	Zingiberales	Marantaceae	Indianthus	1
Streptophyta	Liliopsida	Zingiberales	Marantaceae	Ischnosiphon	8
Streptophyta	Liliopsida	Zingiberales	Marantaceae	Maranta	2
Streptophyta	Liliopsida	Zingiberales	Marantaceae	Marantochloa	3
Streptophyta	Liliopsida	Zingiberales	Marantaceae	Megaphrynium	1
Streptophyta	Liliopsida	Zingiberales	Marantaceae	Monotagma	7
Streptophyta	Liliopsida	Zingiberales	Marantaceae	Phrynium	4
Streptophyta	Liliopsida	Zingiberales	Marantaceae	Pleiostachya	1
Streptophyta	Liliopsida	Zingiberales	Marantaceae	Saranthe	1
Streptophyta	Liliopsida	Zingiberales	Marantaceae	Sarcophrynium	1
Streptophyta	Liliopsida	Zingiberales	Marantaceae	Schumannianthus	1
Streptophyta	Liliopsida	Zingiberales	Marantaceae	Stachyphrynium	1
Streptophyta	Liliopsida	Zingiberales	Marantaceae	Thalia	2
Streptophyta	Liliopsida	Zingiberales	Marantaceae	Thaumatococcus	1
Streptophyta	Liliopsida	Zingiberales	Marantaceae	Trachyphrynium	1
Streptophyta	Liliopsida	Zingiberales	Musaceae	Ensete	2
Streptophyta	Liliopsida	Zingiberales	Musaceae	Musa	6
Streptophyta	Liliopsida	Zingiberales	Musaceae	Musella	1
Streptophyta	Liliopsida	Zingiberales	Strelitziaceae	Phenakospermum	1
Streptophyta	Liliopsida	Zingiberales	Strelitziaceae	Ravenala	1
Streptophyta	Liliopsida	Zingiberales	Strelitziaceae	Strelitzia	2
Streptophyta	Liliopsida	Zingiberales	Zingiberaceae	Aframomum	5					1
Streptophyta	Liliopsida	Zingiberales	Zingiberaceae	Alpinia	6
Streptophyta	Liliopsida	Zingiberales	Zingiberaceae	Amomum	6
Streptophyta	Liliopsida	Zingiberales	Zingiberaceae	Burbidgea	1
Streptophyta	Liliopsida	Zingiberales	Zingiberaceae	Cautleya		1
Streptophyta	Liliopsida	Zingiberales	Zingiberaceae	Curcuma	11
Streptophyta	Liliopsida	Zingiberales	Zingiberaceae	Distichochlamys	2
Streptophyta	Liliopsida	Zingiberales	Zingiberaceae	Elettariopsis	1
Streptophyta	Liliopsida	Zingiberales	Zingiberaceae	Etlingera	11					1
Streptophyta	Liliopsida	Zingiberales	Zingiberaceae	Gagnepainia	1
Streptophyta	Liliopsida	Zingiberales	Zingiberaceae	Geocharis	1
Streptophyta	Liliopsida	Zingiberales	Zingiberaceae	Geostachys		1
Streptophyta	Liliopsida	Zingiberales	Zingiberaceae	Globba	1
Streptophyta	Liliopsida	Zingiberales	Zingiberaceae	Hedychium	1
Streptophyta	Liliopsida	Zingiberales	Zingiberaceae	Hornstedtia	2
Streptophyta	Liliopsida	Zingiberales	Zingiberaceae	Kaempferia	1
Streptophyta	Liliopsida	Zingiberales	Zingiberaceae	Myxochlamys	1
Streptophyta	Liliopsida	Zingiberales	Zingiberaceae	Renealmia	5
Streptophyta	Liliopsida	Zingiberales	Zingiberaceae	Scaphochlamys	1
Streptophyta	Liliopsida	Zingiberales	Zingiberaceae	Siamanthus	1
Streptophyta	Liliopsida	Zingiberales	Zingiberaceae	Zingiber	1	2
Streptophyta	Lycopodiopsida	Isoetales	Isoetaceae	Isoetes	2
Streptophyta	Lycopodiopsida	Lycopodiales	Lycopodiaceae	Palhinhaea	1
Streptophyta	Marchantiopsida	Marchantiales	Marchantiaceae	Bucegia	1
Streptophyta	Marchantiopsida	Marchantiales	Ricciaceae	Riccia	23
Streptophyta	Polypodiopsida	Polypodiales	Dryopteridaceae	Dryopteris	1
Streptophyta	Polypodiopsida	Polypodiales	Polypodiaceae	Polypodium	1
Streptophyta	Streptophyta_Incertae_sedis	Apiales	Apiaceae	Aegopodium	1
Streptophyta	Streptophyta_Incertae_sedis	Apiales	Apiaceae	Aethusa	1
Streptophyta	Streptophyta_Incertae_sedis	Apiales	Apiaceae	Anethum	1
Streptophyta	Streptophyta_Incertae_sedis	Apiales	Apiaceae	Angelica	3
Streptophyta	Streptophyta_Incertae_sedis	Apiales	Apiaceae	Anisosciadium	1
Streptophyta	Streptophyta_Incertae_sedis	Apiales	Apiaceae	Anthriscus	2
Streptophyta	Streptophyta_Incertae_sedis	Apiales	Apiaceae	Apiaceae_Incertae_sedis	1
Streptophyta	Streptophyta_Incertae_sedis	Apiales	Apiaceae	Apium	1
Streptophyta	Streptophyta_Incertae_sedis	Apiales	Apiaceae	Berula	1
Streptophyta	Streptophyta_Incertae_sedis	Apiales	Apiaceae	Bunium	1
Streptophyta	Streptophyta_Incertae_sedis	Apiales	Apiaceae	Bupleurum	2	1
Streptophyta	Streptophyta_Incertae_sedis	Apiales	Apiaceae	Carum	2
Streptophyta	Streptophyta_Incertae_sedis	Apiales	Apiaceae	Centella	1
Streptophyta	Streptophyta_Incertae_sedis	Apiales	Apiaceae	Chaerophyllum	1
Streptophyta	Streptophyta_Incertae_sedis	Apiales	Apiaceae	Cicuta	1
Streptophyta	Streptophyta_Incertae_sedis	Apiales	Apiaceae	Cnidium	1
Streptophyta	Streptophyta_Incertae_sedis	Apiales	Apiaceae	Conium	1
Streptophyta	Streptophyta_Incertae_sedis	Apiales	Apiaceae	Conopodium	1
Streptophyta	Streptophyta_Incertae_sedis	Apiales	Apiaceae	Cuminum	1
Streptophyta	Streptophyta_Incertae_sedis	Apiales	Apiaceae	Daucus	1
Streptophyta	Streptophyta_Incertae_sedis	Apiales	Apiaceae	Deverra	1
Streptophyta	Streptophyta_Incertae_sedis	Apiales	Apiaceae	Ducrosia	1
Streptophyta	Streptophyta_Incertae_sedis	Apiales	Apiaceae	Eriocycla	1
Streptophyta	Streptophyta_Incertae_sedis	Apiales	Apiaceae	Eryngium	3
Streptophyta	Streptophyta_Incertae_sedis	Apiales	Apiaceae	Ferula	13
Streptophyta	Streptophyta_Incertae_sedis	Apiales	Apiaceae	Foeniculum	1
Streptophyta	Streptophyta_Incertae_sedis	Apiales	Apiaceae	Glehnia	1
Streptophyta	Streptophyta_Incertae_sedis	Apiales	Apiaceae	Helosciadium	4
Streptophyta	Streptophyta_Incertae_sedis	Apiales	Apiaceae	Heracleum	1
Streptophyta	Streptophyta_Incertae_sedis	Apiales	Apiaceae	Hymenidium	1
Streptophyta	Streptophyta_Incertae_sedis	Apiales	Apiaceae	Ledebouriella	1
Streptophyta	Streptophyta_Incertae_sedis	Apiales	Apiaceae	Libanotis	1
Streptophyta	Streptophyta_Incertae_sedis	Apiales	Apiaceae	Ligusticum	4
Streptophyta	Streptophyta_Incertae_sedis	Apiales	Apiaceae	Meeboldia	1
Streptophyta	Streptophyta_Incertae_sedis	Apiales	Apiaceae	Meum	1
Streptophyta	Streptophyta_Incertae_sedis	Apiales	Apiaceae	Oenanthe	4
Streptophyta	Streptophyta_Incertae_sedis	Apiales	Apiaceae	Osmorhiza	1
Streptophyta	Streptophyta_Incertae_sedis	Apiales	Apiaceae	Pachypleurum	1
Streptophyta	Streptophyta_Incertae_sedis	Apiales	Apiaceae	Pastinaca	1
Streptophyta	Streptophyta_Incertae_sedis	Apiales	Apiaceae	Petroselinum	1
Streptophyta	Streptophyta_Incertae_sedis	Apiales	Apiaceae	Peucedanum	7
Streptophyta	Streptophyta_Incertae_sedis	Apiales	Apiaceae	Physospermum	1
Streptophyta	Streptophyta_Incertae_sedis	Apiales	Apiaceae	Pimpinella	7
Streptophyta	Streptophyta_Incertae_sedis	Apiales	Apiaceae	Sanicula	1
Streptophyta	Streptophyta_Incertae_sedis	Apiales	Apiaceae	Scandix	1
Streptophyta	Streptophyta_Incertae_sedis	Apiales	Apiaceae	Selinum	2
Streptophyta	Streptophyta_Incertae_sedis	Apiales	Apiaceae	Seseli	1
Streptophyta	Streptophyta_Incertae_sedis	Apiales	Apiaceae	Silaum	1
Streptophyta	Streptophyta_Incertae_sedis	Apiales	Apiaceae	Sison	2
Streptophyta	Streptophyta_Incertae_sedis	Apiales	Apiaceae	Sium	1
Streptophyta	Streptophyta_Incertae_sedis	Apiales	Apiaceae	Smyrnium	1
Streptophyta	Streptophyta_Incertae_sedis	Apiales	Apiaceae	Sphallerocarpus	1
Streptophyta	Streptophyta_Incertae_sedis	Apiales	Apiaceae	Torilis	2
Streptophyta	Streptophyta_Incertae_sedis	Apiales	Apiaceae	Trachyspermum	1
Streptophyta	Streptophyta_Incertae_sedis	Apiales	Apiaceae	Trinia	1
Streptophyta	Streptophyta_Incertae_sedis	Apiales	Apiaceae	Trocdaris	1
Streptophyta	Streptophyta_Incertae_sedis	Apiales	Apiaceae	x_Beruladium	1
Streptophyta	Streptophyta_Incertae_sedis	Apiales	Araliaceae	Aralia	2
Streptophyta	Streptophyta_Incertae_sedis	Apiales	Araliaceae	Brassaiopsis	1
Streptophyta	Streptophyta_Incertae_sedis	Apiales	Araliaceae	Dendropanax	1
Streptophyta	Streptophyta_Incertae_sedis	Apiales	Araliaceae	Eleutherococcus	2
Streptophyta	Streptophyta_Incertae_sedis	Apiales	Araliaceae	Gamblea	1
Streptophyta	Streptophyta_Incertae_sedis	Apiales	Araliaceae	Heteropanax	1
Streptophyta	Streptophyta_Incertae_sedis	Apiales	Araliaceae	Kalopanax	1
Streptophyta	Streptophyta_Incertae_sedis	Apiales	Araliaceae	Macropanax	2
Streptophyta	Streptophyta_Incertae_sedis	Apiales	Araliaceae	Oplopanax	1
Streptophyta	Streptophyta_Incertae_sedis	Apiales	Araliaceae	Panax	5
Streptophyta	Streptophyta_Incertae_sedis	Apiales	Araliaceae	Schefflera	2
Streptophyta	Streptophyta_Incertae_sedis	Apiales	Araliaceae	Trevesia	1
Streptophyta	Streptophyta_Incertae_sedis	Apiales	Griseliniaceae	Griselinia	7
Streptophyta	Streptophyta_Incertae_sedis	Apiales	Pittosporaceae	Pittosporum	1
Streptophyta	Streptophyta_Incertae_sedis	Aquifoliales	Aquifoliaceae	Ilex	3
Streptophyta	Streptophyta_Incertae_sedis	Aquifoliales	Stemonuraceae	Gomphandra	1
Streptophyta	Streptophyta_Incertae_sedis	Araucariales	Podocarpaceae	Acmopyle				2
Streptophyta	Streptophyta_Incertae_sedis	Araucariales	Podocarpaceae	Afrocarpus				5
Streptophyta	Streptophyta_Incertae_sedis	Araucariales	Podocarpaceae	Dacrycarpus				5
Streptophyta	Streptophyta_Incertae_sedis	Araucariales	Podocarpaceae	Dacrydium				8
Streptophyta	Streptophyta_Incertae_sedis	Araucariales	Podocarpaceae	Falcatifolium				2
Streptophyta	Streptophyta_Incertae_sedis	Araucariales	Podocarpaceae	Lagarostrobos				1
Streptophyta	Streptophyta_Incertae_sedis	Araucariales	Podocarpaceae	Lepidothamnus				1
Streptophyta	Streptophyta_Incertae_sedis	Araucariales	Podocarpaceae	Manoao				1
Streptophyta	Streptophyta_Incertae_sedis	Araucariales	Podocarpaceae	Microcachrys				1
Streptophyta	Streptophyta_Incertae_sedis	Araucariales	Podocarpaceae	Nageia				5
Streptophyta	Streptophyta_Incertae_sedis	Araucariales	Podocarpaceae	Pherosphaera				1
Streptophyta	Streptophyta_Incertae_sedis	Araucariales	Podocarpaceae	Podocarpus				76
Streptophyta	Streptophyta_Incertae_sedis	Araucariales	Podocarpaceae	Prumnopitys				6
Streptophyta	Streptophyta_Incertae_sedis	Araucariales	Podocarpaceae	Retrophyllum				4
Streptophyta	Streptophyta_Incertae_sedis	Araucariales	Podocarpaceae	Saxegothaea				1
Streptophyta	Streptophyta_Incertae_sedis	Araucariales	Podocarpaceae	Sundacarpus				1
Streptophyta	Streptophyta_Incertae_sedis	Asterales	Asteraceae	Aaronsohnia	1
Streptophyta	Streptophyta_Incertae_sedis	Asterales	Asteraceae	Achillea	3
Streptophyta	Streptophyta_Incertae_sedis	Asterales	Asteraceae	Acritopappus	1
Streptophyta	Streptophyta_Incertae_sedis	Asterales	Asteraceae	Adelostigma	1
Streptophyta	Streptophyta_Incertae_sedis	Asterales	Asteraceae	Agrianthus	1
Streptophyta	Streptophyta_Incertae_sedis	Asterales	Asteraceae	Anacyclus	1
Streptophyta	Streptophyta_Incertae_sedis	Asterales	Asteraceae	Anaphalis	1
Streptophyta	Streptophyta_Incertae_sedis	Asterales	Asteraceae	Andryala	1
Streptophyta	Streptophyta_Incertae_sedis	Asterales	Asteraceae	Anisopappus	2
Streptophyta	Streptophyta_Incertae_sedis	Asterales	Asteraceae	Antennaria	1
Streptophyta	Streptophyta_Incertae_sedis	Asterales	Asteraceae	Anthemis	1
Streptophyta	Streptophyta_Incertae_sedis	Asterales	Asteraceae	Antiphiona	2
Streptophyta	Streptophyta_Incertae_sedis	Asterales	Asteraceae	Anvillea	1
Streptophyta	Streptophyta_Incertae_sedis	Asterales	Asteraceae	Archibaccharis	1
Streptophyta	Streptophyta_Incertae_sedis	Asterales	Asteraceae	Arctium	3
Streptophyta	Streptophyta_Incertae_sedis	Asterales	Asteraceae	Arnoseris	1
Streptophyta	Streptophyta_Incertae_sedis	Asterales	Asteraceae	Artemisia	10
Streptophyta	Streptophyta_Incertae_sedis	Asterales	Asteraceae	Aster	2
Streptophyta	Streptophyta_Incertae_sedis	Asterales	Asteraceae	Asteraceae_Incertae_sedis	2
Streptophyta	Streptophyta_Incertae_sedis	Asterales	Asteraceae	Athanasia	1
Streptophyta	Streptophyta_Incertae_sedis	Asterales	Asteraceae	Atractylis	3
Streptophyta	Streptophyta_Incertae_sedis	Asterales	Asteraceae	Atractylodes	4
Streptophyta	Streptophyta_Incertae_sedis	Asterales	Asteraceae	Aztecaster	1
Streptophyta	Streptophyta_Incertae_sedis	Asterales	Asteraceae	Baccharis	2
Streptophyta	Streptophyta_Incertae_sedis	Asterales	Asteraceae	Barnadesia	1
Streptophyta	Streptophyta_Incertae_sedis	Asterales	Asteraceae	Barrosoa	1
Streptophyta	Streptophyta_Incertae_sedis	Asterales	Asteraceae	Bellis	1
Streptophyta	Streptophyta_Incertae_sedis	Asterales	Asteraceae	Bidens	4
Streptophyta	Streptophyta_Incertae_sedis	Asterales	Asteraceae	Blakiella	1
Streptophyta	Streptophyta_Incertae_sedis	Asterales	Asteraceae	Blumea	4
Streptophyta	Streptophyta_Incertae_sedis	Asterales	Asteraceae	Calendula	2
Streptophyta	Streptophyta_Incertae_sedis	Asterales	Asteraceae	Callilepis					1
Streptophyta	Streptophyta_Incertae_sedis	Asterales	Asteraceae	Calostephane	1
Streptophyta	Streptophyta_Incertae_sedis	Asterales	Asteraceae	Campuloclinium	1
Streptophyta	Streptophyta_Incertae_sedis	Asterales	Asteraceae	Carduus	6
Streptophyta	Streptophyta_Incertae_sedis	Asterales	Asteraceae	Carlina	2
Streptophyta	Streptophyta_Incertae_sedis	Asterales	Asteraceae	Carpesium	1
Streptophyta	Streptophyta_Incertae_sedis	Asterales	Asteraceae	Carthamus	5
Streptophyta	Streptophyta_Incertae_sedis	Asterales	Asteraceae	Centaurea	8
Streptophyta	Streptophyta_Incertae_sedis	Asterales	Asteraceae	Centipeda	10
Streptophyta	Streptophyta_Incertae_sedis	Asterales	Asteraceae	Chiliadenus	6
Streptophyta	Streptophyta_Incertae_sedis	Asterales	Asteraceae	Chrysanthemum	2
Streptophyta	Streptophyta_Incertae_sedis	Asterales	Asteraceae	Chrysophthalmum	3
Streptophyta	Streptophyta_Incertae_sedis	Asterales	Asteraceae	Chuquiraga	13
Streptophyta	Streptophyta_Incertae_sedis	Asterales	Asteraceae	Cicerbita	1
Streptophyta	Streptophyta_Incertae_sedis	Asterales	Asteraceae	Cichorium	2
Streptophyta	Streptophyta_Incertae_sedis	Asterales	Asteraceae	Cineraria	2
Streptophyta	Streptophyta_Incertae_sedis	Asterales	Asteraceae	Cirsium	9
Streptophyta	Streptophyta_Incertae_sedis	Asterales	Asteraceae	Corethrogyne	1
Streptophyta	Streptophyta_Incertae_sedis	Asterales	Asteraceae	Cotula	2
Streptophyta	Streptophyta_Incertae_sedis	Asterales	Asteraceae	Crassocephalum	1
Streptophyta	Streptophyta_Incertae_sedis	Asterales	Asteraceae	Cratystylis	2
Streptophyta	Streptophyta_Incertae_sedis	Asterales	Asteraceae	Crepis	5
Streptophyta	Streptophyta_Incertae_sedis	Asterales	Asteraceae	Cylindrocline	2
Streptophyta	Streptophyta_Incertae_sedis	Asterales	Asteraceae	Cymbopappus	2
Streptophyta	Streptophyta_Incertae_sedis	Asterales	Asteraceae	Dasyphyllum	3
Streptophyta	Streptophyta_Incertae_sedis	Asterales	Asteraceae	Diplostephium	64
Streptophyta	Streptophyta_Incertae_sedis	Asterales	Asteraceae	Dittrichia	1
Streptophyta	Streptophyta_Incertae_sedis	Asterales	Asteraceae	Doniophyton	1
Streptophyta	Streptophyta_Incertae_sedis	Asterales	Asteraceae	Duhaldea	1
Streptophyta	Streptophyta_Incertae_sedis	Asterales	Asteraceae	Echinops	1
Streptophyta	Streptophyta_Incertae_sedis	Asterales	Asteraceae	Epaltes	3
Streptophyta	Streptophyta_Incertae_sedis	Asterales	Asteraceae	Erigeron	3
Streptophyta	Streptophyta_Incertae_sedis	Asterales	Asteraceae	Eriocephalus	1
Streptophyta	Streptophyta_Incertae_sedis	Asterales	Asteraceae	Eumorphia	1
Streptophyta	Streptophyta_Incertae_sedis	Asterales	Asteraceae	Eupatorium	1
Streptophyta	Streptophyta_Incertae_sedis	Asterales	Asteraceae	Exostigma	1
Streptophyta	Streptophyta_Incertae_sedis	Asterales	Asteraceae	Filago	2
Streptophyta	Streptophyta_Incertae_sedis	Asterales	Asteraceae	Floscaldasia	1
Streptophyta	Streptophyta_Incertae_sedis	Asterales	Asteraceae	Foveolina	3
Streptophyta	Streptophyta_Incertae_sedis	Asterales	Asteraceae	Francoeuria	1
Streptophyta	Streptophyta_Incertae_sedis	Asterales	Asteraceae	Geigeria	22
Streptophyta	Streptophyta_Incertae_sedis	Asterales	Asteraceae	Glebionis	1
Streptophyta	Streptophyta_Incertae_sedis	Asterales	Asteraceae	Gnaphalium	3
Streptophyta	Streptophyta_Incertae_sedis	Asterales	Asteraceae	Guizotia	1
Streptophyta	Streptophyta_Incertae_sedis	Asterales	Asteraceae	Gymnarrhena	1
Streptophyta	Streptophyta_Incertae_sedis	Asterales	Asteraceae	Gymnopentzia	1
Streptophyta	Streptophyta_Incertae_sedis	Asterales	Asteraceae	Gyptis	1
Streptophyta	Streptophyta_Incertae_sedis	Asterales	Asteraceae	Helianthus	1
Streptophyta	Streptophyta_Incertae_sedis	Asterales	Asteraceae	Helichrysum	2
Streptophyta	Streptophyta_Incertae_sedis	Asterales	Asteraceae	Helminthotheca	1
Streptophyta	Streptophyta_Incertae_sedis	Asterales	Asteraceae	Heterothalamus	1
Streptophyta	Streptophyta_Incertae_sedis	Asterales	Asteraceae	Hieracium	14
Streptophyta	Streptophyta_Incertae_sedis	Asterales	Asteraceae	Hinterhubera	1
Streptophyta	Streptophyta_Incertae_sedis	Asterales	Asteraceae	Homogyne	1
Streptophyta	Streptophyta_Incertae_sedis	Asterales	Asteraceae	Huarpea	1
Streptophyta	Streptophyta_Incertae_sedis	Asterales	Asteraceae	Hymenolepis	1
Streptophyta	Streptophyta_Incertae_sedis	Asterales	Asteraceae	Hypochaeris	3
Streptophyta	Streptophyta_Incertae_sedis	Asterales	Asteraceae	Ifloga	1
Streptophyta	Streptophyta_Incertae_sedis	Asterales	Asteraceae	Inezia	1
Streptophyta	Streptophyta_Incertae_sedis	Asterales	Asteraceae	Inula	17
Streptophyta	Streptophyta_Incertae_sedis	Asterales	Asteraceae	Inulanthera	2
Streptophyta	Streptophyta_Incertae_sedis	Asterales	Asteraceae	Iphiona	5
Streptophyta	Streptophyta_Incertae_sedis	Asterales	Asteraceae	Iphionopsis	2				1
Streptophyta	Streptophyta_Incertae_sedis	Asterales	Asteraceae	Jacobaea	5
Streptophyta	Streptophyta_Incertae_sedis	Asterales	Asteraceae	Karelinia	1
Streptophyta	Streptophyta_Incertae_sedis	Asterales	Asteraceae	Koelpinia	1
Streptophyta	Streptophyta_Incertae_sedis	Asterales	Asteraceae	Lactuca	6
Streptophyta	Streptophyta_Incertae_sedis	Asterales	Asteraceae	Laennecia	1
Streptophyta	Streptophyta_Incertae_sedis	Asterales	Asteraceae	Laestadia	1
Streptophyta	Streptophyta_Incertae_sedis	Asterales	Asteraceae	Lagenophora	1
Streptophyta	Streptophyta_Incertae_sedis	Asterales	Asteraceae	Laggera	3
Streptophyta	Streptophyta_Incertae_sedis	Asterales	Asteraceae	Lapsana	1
Streptophyta	Streptophyta_Incertae_sedis	Asterales	Asteraceae	Launaea	4
Streptophyta	Streptophyta_Incertae_sedis	Asterales	Asteraceae	Leontodon	7
Streptophyta	Streptophyta_Incertae_sedis	Asterales	Asteraceae	Leucanthemum	1
Streptophyta	Streptophyta_Incertae_sedis	Asterales	Asteraceae	Leucheria	4
Streptophyta	Streptophyta_Incertae_sedis	Asterales	Asteraceae	Leucoptera	1
Streptophyta	Streptophyta_Incertae_sedis	Asterales	Asteraceae	Lidbeckia	1
Streptophyta	Streptophyta_Incertae_sedis	Asterales	Asteraceae	Lifago	1
Streptophyta	Streptophyta_Incertae_sedis	Asterales	Asteraceae	Ligularia	2
Streptophyta	Streptophyta_Incertae_sedis	Asterales	Asteraceae	Limbarda	1
Streptophyta	Streptophyta_Incertae_sedis	Asterales	Asteraceae	Logfia	2
Streptophyta	Streptophyta_Incertae_sedis	Asterales	Asteraceae	Macropodina	1
Streptophyta	Streptophyta_Incertae_sedis	Asterales	Asteraceae	Marasmodes	8
Streptophyta	Streptophyta_Incertae_sedis	Asterales	Asteraceae	Matricaria	1
Streptophyta	Streptophyta_Incertae_sedis	Asterales	Asteraceae	Mikania	1
Streptophyta	Streptophyta_Incertae_sedis	Asterales	Asteraceae	Mollera	1
Streptophyta	Streptophyta_Incertae_sedis	Asterales	Asteraceae	Monarrhenus	2
Streptophyta	Streptophyta_Incertae_sedis	Asterales	Asteraceae	Mutisia	1
Streptophyta	Streptophyta_Incertae_sedis	Asterales	Asteraceae	Myxopappus	2
Streptophyta	Streptophyta_Incertae_sedis	Asterales	Asteraceae	Neojeffreya	1
Streptophyta	Streptophyta_Incertae_sedis	Asterales	Asteraceae	Nicolasia	6
Streptophyta	Streptophyta_Incertae_sedis	Asterales	Asteraceae	Oncosiphon	6
Streptophyta	Streptophyta_Incertae_sedis	Asterales	Asteraceae	Ondetia	1
Streptophyta	Streptophyta_Incertae_sedis	Asterales	Asteraceae	Onopordum	1
Streptophyta	Streptophyta_Incertae_sedis	Asterales	Asteraceae	Oritrophium		1
Streptophyta	Streptophyta_Incertae_sedis	Asterales	Asteraceae	Pallenis	1
Streptophyta	Streptophyta_Incertae_sedis	Asterales	Asteraceae	Parastrephia	1
Streptophyta	Streptophyta_Incertae_sedis	Asterales	Asteraceae	Pechuel-loeschea	1
Streptophyta	Streptophyta_Incertae_sedis	Asterales	Asteraceae	Pegolettia	4
Streptophyta	Streptophyta_Incertae_sedis	Asterales	Asteraceae	Pentanema	4
Streptophyta	Streptophyta_Incertae_sedis	Asterales	Asteraceae	Pentzia	23
Streptophyta	Streptophyta_Incertae_sedis	Asterales	Asteraceae	Perezia	1
Streptophyta	Streptophyta_Incertae_sedis	Asterales	Asteraceae	Pericallis	2
Streptophyta	Streptophyta_Incertae_sedis	Asterales	Asteraceae	Perralderia	2
Streptophyta	Streptophyta_Incertae_sedis	Asterales	Asteraceae	Petasites	5
Streptophyta	Streptophyta_Incertae_sedis	Asterales	Asteraceae	Phymaspermum	1
Streptophyta	Streptophyta_Incertae_sedis	Asterales	Asteraceae	Picris	2
Streptophyta	Streptophyta_Incertae_sedis	Asterales	Asteraceae	Pilosella	6
Streptophyta	Streptophyta_Incertae_sedis	Asterales	Asteraceae	Pluchea	27
Streptophyta	Streptophyta_Incertae_sedis	Asterales	Asteraceae	Porphyrostemma	1
Streptophyta	Streptophyta_Incertae_sedis	Asterales	Asteraceae	Proustia	1
Streptophyta	Streptophyta_Incertae_sedis	Asterales	Asteraceae	Pseudoconyza	1
Streptophyta	Streptophyta_Incertae_sedis	Asterales	Asteraceae	Pterocaulon	12
Streptophyta	Streptophyta_Incertae_sedis	Asterales	Asteraceae	Pulicaria	20
Streptophyta	Streptophyta_Incertae_sedis	Asterales	Asteraceae	Reichardia	1
Streptophyta	Streptophyta_Incertae_sedis	Asterales	Asteraceae	Rhanteriopsis	1
Streptophyta	Streptophyta_Incertae_sedis	Asterales	Asteraceae	Rhanterium	2
Streptophyta	Streptophyta_Incertae_sedis	Asterales	Asteraceae	Rhaponticum	1
Streptophyta	Streptophyta_Incertae_sedis	Asterales	Asteraceae	Saussurea	4
Streptophyta	Streptophyta_Incertae_sedis	Asterales	Asteraceae	Schistostephium	1
Streptophyta	Streptophyta_Incertae_sedis	Asterales	Asteraceae	Schlechtendalia	1
Streptophyta	Streptophyta_Incertae_sedis	Asterales	Asteraceae	Scorzonera	4
Streptophyta	Streptophyta_Incertae_sedis	Asterales	Asteraceae	Scorzoneroides	2
Streptophyta	Streptophyta_Incertae_sedis	Asterales	Asteraceae	Semiria	1
Streptophyta	Streptophyta_Incertae_sedis	Asterales	Asteraceae	Senecio	2
Streptophyta	Streptophyta_Incertae_sedis	Asterales	Asteraceae	Sigesbeckia	1
Streptophyta	Streptophyta_Incertae_sedis	Asterales	Asteraceae	Silybum	1
Streptophyta	Streptophyta_Incertae_sedis	Asterales	Asteraceae	Solidago	1
Streptophyta	Streptophyta_Incertae_sedis	Asterales	Asteraceae	Sonchus	4
Streptophyta	Streptophyta_Incertae_sedis	Asterales	Asteraceae	Sphaeranthus	13
Streptophyta	Streptophyta_Incertae_sedis	Asterales	Asteraceae	Stenachaenium	3
Streptophyta	Streptophyta_Incertae_sedis	Asterales	Asteraceae	Streptoglossa	4
Streptophyta	Streptophyta_Incertae_sedis	Asterales	Asteraceae	Stylotrichium	1
Streptophyta	Streptophyta_Incertae_sedis	Asterales	Asteraceae	Synotis	1
Streptophyta	Streptophyta_Incertae_sedis	Asterales	Asteraceae	Taraxacum	6
Streptophyta	Streptophyta_Incertae_sedis	Asterales	Asteraceae	Tephroseris	1
Streptophyta	Streptophyta_Incertae_sedis	Asterales	Asteraceae	Tessaria	3
Streptophyta	Streptophyta_Incertae_sedis	Asterales	Asteraceae	Thespidium	1
Streptophyta	Streptophyta_Incertae_sedis	Asterales	Asteraceae	Tragopogon	2
Streptophyta	Streptophyta_Incertae_sedis	Asterales	Asteraceae	Trichogonia	1
Streptophyta	Streptophyta_Incertae_sedis	Asterales	Asteraceae	Tripleurospermum	1
Streptophyta	Streptophyta_Incertae_sedis	Asterales	Asteraceae	Triplocephalum	1
Streptophyta	Streptophyta_Incertae_sedis	Asterales	Asteraceae	Tussilago	1
Streptophyta	Streptophyta_Incertae_sedis	Asterales	Asteraceae	Ursinia	1
Streptophyta	Streptophyta_Incertae_sedis	Asterales	Asteraceae	Varthemia	1
Streptophyta	Streptophyta_Incertae_sedis	Asterales	Asteraceae	Vernonia	3
Streptophyta	Streptophyta_Incertae_sedis	Asterales	Asteraceae	Westoniella	1
Streptophyta	Streptophyta_Incertae_sedis	Asterales	Asteraceae	Xanthium	2
Streptophyta	Streptophyta_Incertae_sedis	Asterales	Asteraceae	Zoutpansbergia	1
Streptophyta	Streptophyta_Incertae_sedis	Asterales	Calyceraceae	Acicarpha	1
Streptophyta	Streptophyta_Incertae_sedis	Asterales	Calyceraceae	Boopis	1
Streptophyta	Streptophyta_Incertae_sedis	Asterales	Calyceraceae	Calycera	2
Streptophyta	Streptophyta_Incertae_sedis	Asterales	Calyceraceae	Nastanthus	1
Streptophyta	Streptophyta_Incertae_sedis	Asterales	Campanulaceae	Campanula		9
Streptophyta	Streptophyta_Incertae_sedis	Asterales	Campanulaceae	Clermontia	20
Streptophyta	Streptophyta_Incertae_sedis	Asterales	Campanulaceae	Codonopsis	4
Streptophyta	Streptophyta_Incertae_sedis	Asterales	Campanulaceae	Cyananthus		2
Streptophyta	Streptophyta_Incertae_sedis	Asterales	Campanulaceae	Cyanea	2
Streptophyta	Streptophyta_Incertae_sedis	Asterales	Campanulaceae	Delissea	1
Streptophyta	Streptophyta_Incertae_sedis	Asterales	Campanulaceae	Legousia		1
Streptophyta	Streptophyta_Incertae_sedis	Asterales	Campanulaceae	Lobelia	3
Streptophyta	Streptophyta_Incertae_sedis	Asterales	Campanulaceae	Phyteuma		2
Streptophyta	Streptophyta_Incertae_sedis	Asterales	Campanulaceae	Platycodon	1
Streptophyta	Streptophyta_Incertae_sedis	Asterales	Campanulaceae	Wahlenbergia	19
Streptophyta	Streptophyta_Incertae_sedis	Asterales	Goodeniaceae	Brunonia	1
Streptophyta	Streptophyta_Incertae_sedis	Asterales	Goodeniaceae	Coopernookia	2
Streptophyta	Streptophyta_Incertae_sedis	Asterales	Goodeniaceae	Diaspasis	1
Streptophyta	Streptophyta_Incertae_sedis	Asterales	Goodeniaceae	Goodenia	11
Streptophyta	Streptophyta_Incertae_sedis	Asterales	Goodeniaceae	Scaevola	4
Streptophyta	Streptophyta_Incertae_sedis	Asterales	Goodeniaceae	Selliera	1
Streptophyta	Streptophyta_Incertae_sedis	Asterales	Goodeniaceae	Velleia	3
Streptophyta	Streptophyta_Incertae_sedis	Asterales	Goodeniaceae	Verreauxia	1
Streptophyta	Streptophyta_Incertae_sedis	Asterales	Menyanthaceae	Menyanthes	1
Streptophyta	Streptophyta_Incertae_sedis	Asterales	Menyanthaceae	Nymphoides	3
Streptophyta	Streptophyta_Incertae_sedis	Asterales	Rousseaceae	Carpodetus	1
Streptophyta	Streptophyta_Incertae_sedis	Austrobaileyales	Schisandraceae	Illicium	9
Streptophyta	Streptophyta_Incertae_sedis	Boraginales	Boraginaceae	Anchusa		2
Streptophyta	Streptophyta_Incertae_sedis	Boraginales	Boraginaceae	Arnebia	1	4
Streptophyta	Streptophyta_Incertae_sedis	Boraginales	Boraginaceae	Buglossoides		1
Streptophyta	Streptophyta_Incertae_sedis	Boraginales	Boraginaceae	Cryptantha		3
Streptophyta	Streptophyta_Incertae_sedis	Boraginales	Boraginaceae	Cynoglossum		2
Streptophyta	Streptophyta_Incertae_sedis	Boraginales	Boraginaceae	Dasynotus		1
Streptophyta	Streptophyta_Incertae_sedis	Boraginales	Boraginaceae	Echium		3
Streptophyta	Streptophyta_Incertae_sedis	Boraginales	Boraginaceae	Eremocarya		1
Streptophyta	Streptophyta_Incertae_sedis	Boraginales	Boraginaceae	Gastrocotyle		1
Streptophyta	Streptophyta_Incertae_sedis	Boraginales	Boraginaceae	Lappula		1
Streptophyta	Streptophyta_Incertae_sedis	Boraginales	Boraginaceae	Lithospermum		3
Streptophyta	Streptophyta_Incertae_sedis	Boraginales	Boraginaceae	Mertensia		1
Streptophyta	Streptophyta_Incertae_sedis	Boraginales	Boraginaceae	Moltkiopsis		1
Streptophyta	Streptophyta_Incertae_sedis	Boraginales	Boraginaceae	Myosotis		7
Streptophyta	Streptophyta_Incertae_sedis	Boraginales	Boraginaceae	Ogastemma		1
Streptophyta	Streptophyta_Incertae_sedis	Boraginales	Boraginaceae	Onosma		2
Streptophyta	Streptophyta_Incertae_sedis	Boraginales	Boraginaceae	Oreocarya		13
Streptophyta	Streptophyta_Incertae_sedis	Boraginales	Boraginaceae	Pectocarya		1
Streptophyta	Streptophyta_Incertae_sedis	Boraginales	Boraginaceae	Pulmonaria		1
Streptophyta	Streptophyta_Incertae_sedis	Boraginales	Boraginaceae	Trigonotis		1
Streptophyta	Streptophyta_Incertae_sedis	Boraginales	Cordiaceae	Cordia	13
Streptophyta	Streptophyta_Incertae_sedis	Boraginales	Cordiaceae	Varronia	3
Streptophyta	Streptophyta_Incertae_sedis	Boraginales	Ehretiaceae	Ehretia	4
Streptophyta	Streptophyta_Incertae_sedis	Boraginales	Heliotropiaceae	Heliotropium	2
Streptophyta	Streptophyta_Incertae_sedis	Boraginales	Heliotropiaceae	Tournefortia	1
Streptophyta	Streptophyta_Incertae_sedis	Brassicales	Brassicaceae	Alliaria	1
Streptophyta	Streptophyta_Incertae_sedis	Brassicales	Brassicaceae	Alyssum	1
Streptophyta	Streptophyta_Incertae_sedis	Brassicales	Brassicaceae	Anastatica	1
Streptophyta	Streptophyta_Incertae_sedis	Brassicales	Brassicaceae	Arabidopsis	2
Streptophyta	Streptophyta_Incertae_sedis	Brassicales	Brassicaceae	Arabis	1
Streptophyta	Streptophyta_Incertae_sedis	Brassicales	Brassicaceae	Barbarea	1
Streptophyta	Streptophyta_Incertae_sedis	Brassicales	Brassicaceae	Biscutella	2
Streptophyta	Streptophyta_Incertae_sedis	Brassicales	Brassicaceae	Brassica	7
Streptophyta	Streptophyta_Incertae_sedis	Brassicales	Brassicaceae	Cakile	2
Streptophyta	Streptophyta_Incertae_sedis	Brassicales	Brassicaceae	Camelina	1
Streptophyta	Streptophyta_Incertae_sedis	Brassicales	Brassicaceae	Capsella	1
Streptophyta	Streptophyta_Incertae_sedis	Brassicales	Brassicaceae	Cardamine	6
Streptophyta	Streptophyta_Incertae_sedis	Brassicales	Brassicaceae	Carrichtera	1
Streptophyta	Streptophyta_Incertae_sedis	Brassicales	Brassicaceae	Cochlearia	5
Streptophyta	Streptophyta_Incertae_sedis	Brassicales	Brassicaceae	Coincya	2
Streptophyta	Streptophyta_Incertae_sedis	Brassicales	Brassicaceae	Crambe	1
Streptophyta	Streptophyta_Incertae_sedis	Brassicales	Brassicaceae	Descurainia	1
Streptophyta	Streptophyta_Incertae_sedis	Brassicales	Brassicaceae	Diplotaxis	3
Streptophyta	Streptophyta_Incertae_sedis	Brassicales	Brassicaceae	Draba	4
Streptophyta	Streptophyta_Incertae_sedis	Brassicales	Brassicaceae	Drabella	1
Streptophyta	Streptophyta_Incertae_sedis	Brassicales	Brassicaceae	Erophila	2
Streptophyta	Streptophyta_Incertae_sedis	Brassicales	Brassicaceae	Eruca	1
Streptophyta	Streptophyta_Incertae_sedis	Brassicales	Brassicaceae	Erysimum	2
Streptophyta	Streptophyta_Incertae_sedis	Brassicales	Brassicaceae	Farsetia	1
Streptophyta	Streptophyta_Incertae_sedis	Brassicales	Brassicaceae	Hornungia	1
Streptophyta	Streptophyta_Incertae_sedis	Brassicales	Brassicaceae	Horwoodia	1
Streptophyta	Streptophyta_Incertae_sedis	Brassicales	Brassicaceae	Iberis	1
Streptophyta	Streptophyta_Incertae_sedis	Brassicales	Brassicaceae	Ionopsidium	1
Streptophyta	Streptophyta_Incertae_sedis	Brassicales	Brassicaceae	Isatis	2
Streptophyta	Streptophyta_Incertae_sedis	Brassicales	Brassicaceae	Lepidium	11
Streptophyta	Streptophyta_Incertae_sedis	Brassicales	Brassicaceae	Leptaleum	1
Streptophyta	Streptophyta_Incertae_sedis	Brassicales	Brassicaceae	Malcolmia	2
Streptophyta	Streptophyta_Incertae_sedis	Brassicales	Brassicaceae	Matthiola	2
Streptophyta	Streptophyta_Incertae_sedis	Brassicales	Brassicaceae	Nasturtium	2
Streptophyta	Streptophyta_Incertae_sedis	Brassicales	Brassicaceae	Neotorularia	1
Streptophyta	Streptophyta_Incertae_sedis	Brassicales	Brassicaceae	Noccaea	1
Streptophyta	Streptophyta_Incertae_sedis	Brassicales	Brassicaceae	Notoceras	1
Streptophyta	Streptophyta_Incertae_sedis	Brassicales	Brassicaceae	Raphanus	2
Streptophyta	Streptophyta_Incertae_sedis	Brassicales	Brassicaceae	Rorippa	4
Streptophyta	Streptophyta_Incertae_sedis	Brassicales	Brassicaceae	Savignya	1
Streptophyta	Streptophyta_Incertae_sedis	Brassicales	Brassicaceae	Schimpera	1
Streptophyta	Streptophyta_Incertae_sedis	Brassicales	Brassicaceae	Sinapis	1
Streptophyta	Streptophyta_Incertae_sedis	Brassicales	Brassicaceae	Sisymbrium	3
Streptophyta	Streptophyta_Incertae_sedis	Brassicales	Brassicaceae	Subularia	1
Streptophyta	Streptophyta_Incertae_sedis	Brassicales	Brassicaceae	Teesdalia	1
Streptophyta	Streptophyta_Incertae_sedis	Brassicales	Brassicaceae	Thlaspi	2
Streptophyta	Streptophyta_Incertae_sedis	Brassicales	Brassicaceae	Turritis	1
Streptophyta	Streptophyta_Incertae_sedis	Brassicales	Brassicaceae	Zilla	1
Streptophyta	Streptophyta_Incertae_sedis	Brassicales	Capparaceae	Boscia	1
Streptophyta	Streptophyta_Incertae_sedis	Brassicales	Capparaceae	Capparis	2
Streptophyta	Streptophyta_Incertae_sedis	Brassicales	Caricaceae	Carica	1
Streptophyta	Streptophyta_Incertae_sedis	Brassicales	Caricaceae	Horovitzia	1
Streptophyta	Streptophyta_Incertae_sedis	Brassicales	Caricaceae	Jarilla	1
Streptophyta	Streptophyta_Incertae_sedis	Brassicales	Caricaceae	Vasconcellea		5
Streptophyta	Streptophyta_Incertae_sedis	Brassicales	Cleomaceae	Cleome	1
Streptophyta	Streptophyta_Incertae_sedis	Buxales	Buxaceae	Buxus	9	3
Streptophyta	Streptophyta_Incertae_sedis	Buxales	Buxaceae	Didymeles	1
Streptophyta	Streptophyta_Incertae_sedis	Buxales	Buxaceae	Notobuxus	2
Streptophyta	Streptophyta_Incertae_sedis	Buxales	Buxaceae	Pachysandra	3
Streptophyta	Streptophyta_Incertae_sedis	Buxales	Buxaceae	Sarcococca	5
Streptophyta	Streptophyta_Incertae_sedis	Buxales	Buxaceae	Styloceras									1
Streptophyta	Streptophyta_Incertae_sedis	Canellales	Winteraceae	Drimys		1
Streptophyta	Streptophyta_Incertae_sedis	Caryophyllales	Aizoaceae	Aizoanthemum	1
Streptophyta	Streptophyta_Incertae_sedis	Caryophyllales	Aizoaceae	Aizoon	1
Streptophyta	Streptophyta_Incertae_sedis	Caryophyllales	Aizoaceae	Mesembryanthemum	1
Streptophyta	Streptophyta_Incertae_sedis	Caryophyllales	Aizoaceae	Sesuvium	2
Streptophyta	Streptophyta_Incertae_sedis	Caryophyllales	Amaranthaceae	Achyranthes	1
Streptophyta	Streptophyta_Incertae_sedis	Caryophyllales	Amaranthaceae	Alternanthera	1		1
Streptophyta	Streptophyta_Incertae_sedis	Caryophyllales	Amaranthaceae	Celosia	1
Streptophyta	Streptophyta_Incertae_sedis	Caryophyllales	Ancistrocladaceae	Ancistrocladus	43
Streptophyta	Streptophyta_Incertae_sedis	Caryophyllales	Cactaceae	Stenocereus	1
Streptophyta	Streptophyta_Incertae_sedis	Caryophyllales	Caryophyllaceae	Agrostemma		1
Streptophyta	Streptophyta_Incertae_sedis	Caryophyllales	Caryophyllaceae	Arenaria		2
Streptophyta	Streptophyta_Incertae_sedis	Caryophyllales	Caryophyllaceae	Atocion		4
Streptophyta	Streptophyta_Incertae_sedis	Caryophyllales	Caryophyllaceae	Cerastium		10
Streptophyta	Streptophyta_Incertae_sedis	Caryophyllales	Caryophyllaceae	Cherleria		1
Streptophyta	Streptophyta_Incertae_sedis	Caryophyllales	Caryophyllaceae	Corrigiola	1
Streptophyta	Streptophyta_Incertae_sedis	Caryophyllales	Caryophyllaceae	Dianthus		2
Streptophyta	Streptophyta_Incertae_sedis	Caryophyllales	Caryophyllaceae	Gypsophila		2
Streptophyta	Streptophyta_Incertae_sedis	Caryophyllales	Caryophyllaceae	Herniaria	1
Streptophyta	Streptophyta_Incertae_sedis	Caryophyllales	Caryophyllaceae	Honckenya		1
Streptophyta	Streptophyta_Incertae_sedis	Caryophyllales	Caryophyllaceae	Illecebrum	1
Streptophyta	Streptophyta_Incertae_sedis	Caryophyllales	Caryophyllaceae	Loeflingia		1
Streptophyta	Streptophyta_Incertae_sedis	Caryophyllales	Caryophyllaceae	Moehringia		1
Streptophyta	Streptophyta_Incertae_sedis	Caryophyllales	Caryophyllaceae	Moenchia		1
Streptophyta	Streptophyta_Incertae_sedis	Caryophyllales	Caryophyllaceae	Myosoton		1
Streptophyta	Streptophyta_Incertae_sedis	Caryophyllales	Caryophyllaceae	Paronychia	1
Streptophyta	Streptophyta_Incertae_sedis	Caryophyllales	Caryophyllaceae	Petrorhagia		1
Streptophyta	Streptophyta_Incertae_sedis	Caryophyllales	Caryophyllaceae	Polycarpaea	2
Streptophyta	Streptophyta_Incertae_sedis	Caryophyllales	Caryophyllaceae	Polycarpon	1
Streptophyta	Streptophyta_Incertae_sedis	Caryophyllales	Caryophyllaceae	Sabulina		3
Streptophyta	Streptophyta_Incertae_sedis	Caryophyllales	Caryophyllaceae	Sagina		7
Streptophyta	Streptophyta_Incertae_sedis	Caryophyllales	Caryophyllaceae	Saponaria		1
Streptophyta	Streptophyta_Incertae_sedis	Caryophyllales	Caryophyllaceae	Silene		150
Streptophyta	Streptophyta_Incertae_sedis	Caryophyllales	Caryophyllaceae	Spergula		1
Streptophyta	Streptophyta_Incertae_sedis	Caryophyllales	Caryophyllaceae	Spergularia		5
Streptophyta	Streptophyta_Incertae_sedis	Caryophyllales	Caryophyllaceae	Stellaria		8
Streptophyta	Streptophyta_Incertae_sedis	Caryophyllales	Caryophyllaceae	Vaccaria		1
Streptophyta	Streptophyta_Incertae_sedis	Caryophyllales	Caryophyllaceae	Viscaria		3
Streptophyta	Streptophyta_Incertae_sedis	Caryophyllales	Chenopodiaceae	Atriplex	10				1
Streptophyta	Streptophyta_Incertae_sedis	Caryophyllales	Chenopodiaceae	Bassia	1
Streptophyta	Streptophyta_Incertae_sedis	Caryophyllales	Chenopodiaceae	Bienertia	1
Streptophyta	Streptophyta_Incertae_sedis	Caryophyllales	Chenopodiaceae	Blitum	1
Streptophyta	Streptophyta_Incertae_sedis	Caryophyllales	Chenopodiaceae	Caroxylon	2
Streptophyta	Streptophyta_Incertae_sedis	Caryophyllales	Chenopodiaceae	Chenopodiastrum	2
Streptophyta	Streptophyta_Incertae_sedis	Caryophyllales	Chenopodiaceae	Chenopodium	3
Streptophyta	Streptophyta_Incertae_sedis	Caryophyllales	Chenopodiaceae	Cornulaca	2
Streptophyta	Streptophyta_Incertae_sedis	Caryophyllales	Chenopodiaceae	Dysphania	1
Streptophyta	Streptophyta_Incertae_sedis	Caryophyllales	Chenopodiaceae	Halimione	1
Streptophyta	Streptophyta_Incertae_sedis	Caryophyllales	Chenopodiaceae	Halocnemum	1
Streptophyta	Streptophyta_Incertae_sedis	Caryophyllales	Chenopodiaceae	Halothamnus	1
Streptophyta	Streptophyta_Incertae_sedis	Caryophyllales	Chenopodiaceae	Haloxylon	1
Streptophyta	Streptophyta_Incertae_sedis	Caryophyllales	Chenopodiaceae	Kali	1
Streptophyta	Streptophyta_Incertae_sedis	Caryophyllales	Chenopodiaceae	Lipandra	1
Streptophyta	Streptophyta_Incertae_sedis	Caryophyllales	Chenopodiaceae	Oxybasis	3
Streptophyta	Streptophyta_Incertae_sedis	Caryophyllales	Chenopodiaceae	Salicornia	6
Streptophyta	Streptophyta_Incertae_sedis	Caryophyllales	Chenopodiaceae	Salsola	1
Streptophyta	Streptophyta_Incertae_sedis	Caryophyllales	Chenopodiaceae	Suaeda	4
Streptophyta	Streptophyta_Incertae_sedis	Caryophyllales	Droseraceae	Dionaea	1
Streptophyta	Streptophyta_Incertae_sedis	Caryophyllales	Frankeniaceae	Frankenia	1
Streptophyta	Streptophyta_Incertae_sedis	Caryophyllales	Montiaceae	Claytonia	4
Streptophyta	Streptophyta_Incertae_sedis	Caryophyllales	Montiaceae	Montia	1
Streptophyta	Streptophyta_Incertae_sedis	Caryophyllales	Nepenthaceae	Nepenthes	75			3
Streptophyta	Streptophyta_Incertae_sedis	Caryophyllales	Nyctaginaceae	Boerhavia	1
Streptophyta	Streptophyta_Incertae_sedis	Caryophyllales	Nyctaginaceae	Mirabilis	1
Streptophyta	Streptophyta_Incertae_sedis	Caryophyllales	Nyctaginaceae	Neea	1
Streptophyta	Streptophyta_Incertae_sedis	Caryophyllales	Plumbaginaceae	Armeria	1
Streptophyta	Streptophyta_Incertae_sedis	Caryophyllales	Plumbaginaceae	Limonium	5
Streptophyta	Streptophyta_Incertae_sedis	Caryophyllales	Plumbaginaceae	Plumbago	1
Streptophyta	Streptophyta_Incertae_sedis	Caryophyllales	Plumbaginaceae	Psylliostachys	1
Streptophyta	Streptophyta_Incertae_sedis	Caryophyllales	Polygonaceae	Bistorta	2
Streptophyta	Streptophyta_Incertae_sedis	Caryophyllales	Polygonaceae	Calligonum	1
Streptophyta	Streptophyta_Incertae_sedis	Caryophyllales	Polygonaceae	Fallopia	4
Streptophyta	Streptophyta_Incertae_sedis	Caryophyllales	Polygonaceae	Knorringia	1
Streptophyta	Streptophyta_Incertae_sedis	Caryophyllales	Polygonaceae	Koenigia	1
Streptophyta	Streptophyta_Incertae_sedis	Caryophyllales	Polygonaceae	Persicaria	6
Streptophyta	Streptophyta_Incertae_sedis	Caryophyllales	Polygonaceae	Polygonum	5
Streptophyta	Streptophyta_Incertae_sedis	Caryophyllales	Polygonaceae	Pteroxygonum	2
Streptophyta	Streptophyta_Incertae_sedis	Caryophyllales	Polygonaceae	Rheum	2
Streptophyta	Streptophyta_Incertae_sedis	Caryophyllales	Polygonaceae	Rumex	12
Streptophyta	Streptophyta_Incertae_sedis	Caryophyllales	Polygonaceae	Ruprechtia	16
Streptophyta	Streptophyta_Incertae_sedis	Caryophyllales	Polygonaceae	Salta	1
Streptophyta	Streptophyta_Incertae_sedis	Caryophyllales	Polygonaceae	Triplaris	5
Streptophyta	Streptophyta_Incertae_sedis	Caryophyllales	Portulacaceae	Portulaca	3
Streptophyta	Streptophyta_Incertae_sedis	Caryophyllales	Talinaceae	Talinum	1
Streptophyta	Streptophyta_Incertae_sedis	Celastrales	Celastraceae	Euonymus	5
Streptophyta	Streptophyta_Incertae_sedis	Celastrales	Celastraceae	Parnassia	2
Streptophyta	Streptophyta_Incertae_sedis	Celastrales	Celastraceae	Salacia	3
Streptophyta	Streptophyta_Incertae_sedis	Ceratophyllales	Ceratophyllaceae	Ceratophyllum	3
Streptophyta	Streptophyta_Incertae_sedis	Cornales	Cornaceae	Cornus	1
Streptophyta	Streptophyta_Incertae_sedis	Crossosomatales	Staphyleaceae	Turpinia	4
Streptophyta	Streptophyta_Incertae_sedis	Cucurbitales	Cucurbitaceae	Abobra	1
Streptophyta	Streptophyta_Incertae_sedis	Cucurbitales	Cucurbitaceae	Benincasa	1
Streptophyta	Streptophyta_Incertae_sedis	Cucurbitales	Cucurbitaceae	Blastania	1
Streptophyta	Streptophyta_Incertae_sedis	Cucurbitales	Cucurbitaceae	Bryonia	10
Streptophyta	Streptophyta_Incertae_sedis	Cucurbitales	Cucurbitaceae	Cayaponia	21
Streptophyta	Streptophyta_Incertae_sedis	Cucurbitales	Cucurbitaceae	Cionosicys	4
Streptophyta	Streptophyta_Incertae_sedis	Cucurbitales	Cucurbitaceae	Citrullus	1
Streptophyta	Streptophyta_Incertae_sedis	Cucurbitales	Cucurbitaceae	Cucumis	4
Streptophyta	Streptophyta_Incertae_sedis	Cucurbitales	Cucurbitaceae	Cyclanthera		1
Streptophyta	Streptophyta_Incertae_sedis	Cucurbitales	Cucurbitaceae	Dactyliandra	2
Streptophyta	Streptophyta_Incertae_sedis	Cucurbitales	Cucurbitaceae	Ecballium	1
Streptophyta	Streptophyta_Incertae_sedis	Cucurbitales	Cucurbitaceae	Echinopepon		2
Streptophyta	Streptophyta_Incertae_sedis	Cucurbitales	Cucurbitaceae	Frantzia		4
Streptophyta	Streptophyta_Incertae_sedis	Cucurbitales	Cucurbitaceae	Hanburia		1
Streptophyta	Streptophyta_Incertae_sedis	Cucurbitales	Cucurbitaceae	Linnaeosicyos		1
Streptophyta	Streptophyta_Incertae_sedis	Cucurbitales	Cucurbitaceae	Luffa	1
Streptophyta	Streptophyta_Incertae_sedis	Cucurbitales	Cucurbitaceae	Marah		1
Streptophyta	Streptophyta_Incertae_sedis	Cucurbitales	Cucurbitaceae	Melothria	1
Streptophyta	Streptophyta_Incertae_sedis	Cucurbitales	Cucurbitaceae	Microsechium		2
Streptophyta	Streptophyta_Incertae_sedis	Cucurbitales	Cucurbitaceae	Parasicyos		2
Streptophyta	Streptophyta_Incertae_sedis	Cucurbitales	Cucurbitaceae	Schizocarpum	1
Streptophyta	Streptophyta_Incertae_sedis	Cucurbitales	Cucurbitaceae	Sechiopsis		4
Streptophyta	Streptophyta_Incertae_sedis	Cucurbitales	Cucurbitaceae	Sechium		5
Streptophyta	Streptophyta_Incertae_sedis	Cucurbitales	Cucurbitaceae	Sicyocaulis		1
Streptophyta	Streptophyta_Incertae_sedis	Cucurbitales	Cucurbitaceae	Sicyos		37
Streptophyta	Streptophyta_Incertae_sedis	Cucurbitales	Cucurbitaceae	Sicyosperma		1
Streptophyta	Streptophyta_Incertae_sedis	Cucurbitales	Cucurbitaceae	Telfairia	1
Streptophyta	Streptophyta_Incertae_sedis	Cucurbitales	Cucurbitaceae	Trichosanthes	1
Streptophyta	Streptophyta_Incertae_sedis	Cucurbitales	Cucurbitaceae	Trochomeria	2
Streptophyta	Streptophyta_Incertae_sedis	Cucurbitales	Tetramelaceae	Tetrameles	1
Streptophyta	Streptophyta_Incertae_sedis	Cupressales	Cupressaceae	Cryptomeria	1
Streptophyta	Streptophyta_Incertae_sedis	Cupressales	Taxaceae	Taxus	2
Streptophyta	Streptophyta_Incertae_sedis	Cycadales	Cycadaceae	Cycas	1
Streptophyta	Streptophyta_Incertae_sedis	Cycadales	Zamiaceae	Dioon	11
Streptophyta	Streptophyta_Incertae_sedis	Cycadales	Zamiaceae	Encephalartos	7
Streptophyta	Streptophyta_Incertae_sedis	Dipsacales	Adoxaceae	Adoxa	1
Streptophyta	Streptophyta_Incertae_sedis	Dipsacales	Adoxaceae	Sambucus	2
Streptophyta	Streptophyta_Incertae_sedis	Dipsacales	Adoxaceae	Viburnum	5
Streptophyta	Streptophyta_Incertae_sedis	Dipsacales	Caprifoliaceae	Dipsacus	2
Streptophyta	Streptophyta_Incertae_sedis	Dipsacales	Caprifoliaceae	Lomelosia	2
Streptophyta	Streptophyta_Incertae_sedis	Dipsacales	Caprifoliaceae	Pterocephalus	1
Streptophyta	Streptophyta_Incertae_sedis	Dipsacales	Caprifoliaceae	Scabiosa	1
Streptophyta	Streptophyta_Incertae_sedis	Dipsacales	Caprifoliaceae	Valeriana	1
Streptophyta	Streptophyta_Incertae_sedis	Ephedrales	Ephedraceae	Ephedra	38
Streptophyta	Streptophyta_Incertae_sedis	Ericales	Actinidiaceae	Actinidia	10
Streptophyta	Streptophyta_Incertae_sedis	Ericales	Actinidiaceae	Clematoclethra	1
Streptophyta	Streptophyta_Incertae_sedis	Ericales	Actinidiaceae	Saurauia	31
Streptophyta	Streptophyta_Incertae_sedis	Ericales	Balsaminaceae	Impatiens	3
Streptophyta	Streptophyta_Incertae_sedis	Ericales	Clethraceae	Clethra	14
Streptophyta	Streptophyta_Incertae_sedis	Ericales	Clethraceae	Purdiaea	2
Streptophyta	Streptophyta_Incertae_sedis	Ericales	Cyrillaceae	Cliftonia	1
Streptophyta	Streptophyta_Incertae_sedis	Ericales	Cyrillaceae	Cyrilla	1
Streptophyta	Streptophyta_Incertae_sedis	Ericales	Diapensiaceae	Berneuxia	1
Streptophyta	Streptophyta_Incertae_sedis	Ericales	Diapensiaceae	Diapensia	1
Streptophyta	Streptophyta_Incertae_sedis	Ericales	Diapensiaceae	Galax		1
Streptophyta	Streptophyta_Incertae_sedis	Ericales	Diapensiaceae	Pyxidanthera	1
Streptophyta	Streptophyta_Incertae_sedis	Ericales	Diapensiaceae	Schizocodon	1
Streptophyta	Streptophyta_Incertae_sedis	Ericales	Diapensiaceae	Shortia	3
Streptophyta	Streptophyta_Incertae_sedis	Ericales	Ebenaceae	Diospyros	3
Streptophyta	Streptophyta_Incertae_sedis	Ericales	Ericaceae	Allotropa	1
Streptophyta	Streptophyta_Incertae_sedis	Ericales	Ericaceae	Andersonia	1
Streptophyta	Streptophyta_Incertae_sedis	Ericales	Ericaceae	Andromeda	1
Streptophyta	Streptophyta_Incertae_sedis	Ericales	Ericaceae	Arbutus	3
Streptophyta	Streptophyta_Incertae_sedis	Ericales	Ericaceae	Archeria	1
Streptophyta	Streptophyta_Incertae_sedis	Ericales	Ericaceae	Arctostaphylos	2
Streptophyta	Streptophyta_Incertae_sedis	Ericales	Ericaceae	Bryanthus	1
Streptophyta	Streptophyta_Incertae_sedis	Ericales	Ericaceae	Calluna	1
Streptophyta	Streptophyta_Incertae_sedis	Ericales	Ericaceae	Cassiope	1
Streptophyta	Streptophyta_Incertae_sedis	Ericales	Ericaceae	Chamaedaphne	1
Streptophyta	Streptophyta_Incertae_sedis	Ericales	Ericaceae	Chimaphila	2
Streptophyta	Streptophyta_Incertae_sedis	Ericales	Ericaceae	Comarostaphylis	2
Streptophyta	Streptophyta_Incertae_sedis	Ericales	Ericaceae	Daboecia	1
Streptophyta	Streptophyta_Incertae_sedis	Ericales	Ericaceae	Empetrum	2
Streptophyta	Streptophyta_Incertae_sedis	Ericales	Ericaceae	Enkianthus	3
Streptophyta	Streptophyta_Incertae_sedis	Ericales	Ericaceae	Epacris	1
Streptophyta	Streptophyta_Incertae_sedis	Ericales	Ericaceae	Epigaea	1
Streptophyta	Streptophyta_Incertae_sedis	Ericales	Ericaceae	Erica	442
Streptophyta	Streptophyta_Incertae_sedis	Ericales	Ericaceae	Gaultheria	1
Streptophyta	Streptophyta_Incertae_sedis	Ericales	Ericaceae	Gaylussacia	1
Streptophyta	Streptophyta_Incertae_sedis	Ericales	Ericaceae	Harrimanella	1
Streptophyta	Streptophyta_Incertae_sedis	Ericales	Ericaceae	Hemitomes	1
Streptophyta	Streptophyta_Incertae_sedis	Ericales	Ericaceae	Kalmia	2
Streptophyta	Streptophyta_Incertae_sedis	Ericales	Ericaceae	Kalmiopsis	1
Streptophyta	Streptophyta_Incertae_sedis	Ericales	Ericaceae	Lyonia	1
Streptophyta	Streptophyta_Incertae_sedis	Ericales	Ericaceae	Moneses	1
Streptophyta	Streptophyta_Incertae_sedis	Ericales	Ericaceae	Monotropa	2
Streptophyta	Streptophyta_Incertae_sedis	Ericales	Ericaceae	Monotropastrum	1
Streptophyta	Streptophyta_Incertae_sedis	Ericales	Ericaceae	Monotropsis	2
Streptophyta	Streptophyta_Incertae_sedis	Ericales	Ericaceae	Orthilia	1
Streptophyta	Streptophyta_Incertae_sedis	Ericales	Ericaceae	Oxydendrum	1
Streptophyta	Streptophyta_Incertae_sedis	Ericales	Ericaceae	Phyllodoce	1
Streptophyta	Streptophyta_Incertae_sedis	Ericales	Ericaceae	Pleuricospora	1
Streptophyta	Streptophyta_Incertae_sedis	Ericales	Ericaceae	Pterospora	1
Streptophyta	Streptophyta_Incertae_sedis	Ericales	Ericaceae	Pyrola	4
Streptophyta	Streptophyta_Incertae_sedis	Ericales	Ericaceae	Rhododendron	26
Streptophyta	Streptophyta_Incertae_sedis	Ericales	Ericaceae	Sarcodes		1
Streptophyta	Streptophyta_Incertae_sedis	Ericales	Ericaceae	Sphenotoma	1
Streptophyta	Streptophyta_Incertae_sedis	Ericales	Ericaceae	Vaccinium	4
Streptophyta	Streptophyta_Incertae_sedis	Ericales	Ericaceae	Xylococcus	1
Streptophyta	Streptophyta_Incertae_sedis	Ericales	Lecythidaceae	Barringtonia	3
Streptophyta	Streptophyta_Incertae_sedis	Ericales	Lecythidaceae	Couratari	1
Streptophyta	Streptophyta_Incertae_sedis	Ericales	Marcgraviaceae	Norantea	1
Streptophyta	Streptophyta_Incertae_sedis	Ericales	Pentaphylacaceae	Adinandra	2
Streptophyta	Streptophyta_Incertae_sedis	Ericales	Pentaphylacaceae	Anneslea	1
Streptophyta	Streptophyta_Incertae_sedis	Ericales	Pentaphylacaceae	Eurya	2
Streptophyta	Streptophyta_Incertae_sedis	Ericales	Pentaphylacaceae	Pentaphylax	1
Streptophyta	Streptophyta_Incertae_sedis	Ericales	Pentaphylacaceae	Ternstroemia	1
Streptophyta	Streptophyta_Incertae_sedis	Ericales	Polemoniaceae	Polemonium	1
Streptophyta	Streptophyta_Incertae_sedis	Ericales	Primulaceae	Anagallis	2
Streptophyta	Streptophyta_Incertae_sedis	Ericales	Primulaceae	Ardisia	5
Streptophyta	Streptophyta_Incertae_sedis	Ericales	Primulaceae	Cyclamen	1
Streptophyta	Streptophyta_Incertae_sedis	Ericales	Primulaceae	Dionysia		37
Streptophyta	Streptophyta_Incertae_sedis	Ericales	Primulaceae	Embelia	1
Streptophyta	Streptophyta_Incertae_sedis	Ericales	Primulaceae	Glaux	1
Streptophyta	Streptophyta_Incertae_sedis	Ericales	Primulaceae	Hottonia	1
Streptophyta	Streptophyta_Incertae_sedis	Ericales	Primulaceae	Jacquinia	1
Streptophyta	Streptophyta_Incertae_sedis	Ericales	Primulaceae	Lysimachia	7
Streptophyta	Streptophyta_Incertae_sedis	Ericales	Primulaceae	Maesa	1
Streptophyta	Streptophyta_Incertae_sedis	Ericales	Primulaceae	Primula		9
Streptophyta	Streptophyta_Incertae_sedis	Ericales	Primulaceae	Samolus	11
Streptophyta	Streptophyta_Incertae_sedis	Ericales	Primulaceae	Trientalis	1
Streptophyta	Streptophyta_Incertae_sedis	Ericales	Roridulaceae	Roridula	1
Streptophyta	Streptophyta_Incertae_sedis	Ericales	Sapotaceae	Amorphospermum	1
Streptophyta	Streptophyta_Incertae_sedis	Ericales	Sapotaceae	Argania	1
Streptophyta	Streptophyta_Incertae_sedis	Ericales	Sapotaceae	Aulandra	1
Streptophyta	Streptophyta_Incertae_sedis	Ericales	Sapotaceae	Autranella	1
Streptophyta	Streptophyta_Incertae_sedis	Ericales	Sapotaceae	Beccariella	4
Streptophyta	Streptophyta_Incertae_sedis	Ericales	Sapotaceae	Bemangidia	2
Streptophyta	Streptophyta_Incertae_sedis	Ericales	Sapotaceae	Breviea	1
Streptophyta	Streptophyta_Incertae_sedis	Ericales	Sapotaceae	Burckella	1
Streptophyta	Streptophyta_Incertae_sedis	Ericales	Sapotaceae	Capurodendron	9
Streptophyta	Streptophyta_Incertae_sedis	Ericales	Sapotaceae	Chromolucuma	2
Streptophyta	Streptophyta_Incertae_sedis	Ericales	Sapotaceae	Chrysophyllum	18				1
Streptophyta	Streptophyta_Incertae_sedis	Ericales	Sapotaceae	Delpydora	2
Streptophyta	Streptophyta_Incertae_sedis	Ericales	Sapotaceae	Diploknema	2
Streptophyta	Streptophyta_Incertae_sedis	Ericales	Sapotaceae	Diploon	1
Streptophyta	Streptophyta_Incertae_sedis	Ericales	Sapotaceae	Eberhardtia	1
Streptophyta	Streptophyta_Incertae_sedis	Ericales	Sapotaceae	Ecclinusa	6
Streptophyta	Streptophyta_Incertae_sedis	Ericales	Sapotaceae	Elaeoluma	3
Streptophyta	Streptophyta_Incertae_sedis	Ericales	Sapotaceae	Englerophytum	2
Streptophyta	Streptophyta_Incertae_sedis	Ericales	Sapotaceae	Faucherea	1
Streptophyta	Streptophyta_Incertae_sedis	Ericales	Sapotaceae	Inhambanella	1
Streptophyta	Streptophyta_Incertae_sedis	Ericales	Sapotaceae	Isonandra	4
Streptophyta	Streptophyta_Incertae_sedis	Ericales	Sapotaceae	Labourdonnaisia	2
Streptophyta	Streptophyta_Incertae_sedis	Ericales	Sapotaceae	Labramia	1
Streptophyta	Streptophyta_Incertae_sedis	Ericales	Sapotaceae	Lecomtedoxa	1
Streptophyta	Streptophyta_Incertae_sedis	Ericales	Sapotaceae	Leptostylis	6
Streptophyta	Streptophyta_Incertae_sedis	Ericales	Sapotaceae	Madhuca	8
Streptophyta	Streptophyta_Incertae_sedis	Ericales	Sapotaceae	Magodendron	1
Streptophyta	Streptophyta_Incertae_sedis	Ericales	Sapotaceae	Manilkara	7
Streptophyta	Streptophyta_Incertae_sedis	Ericales	Sapotaceae	Micropholis	6
Streptophyta	Streptophyta_Incertae_sedis	Ericales	Sapotaceae	Mimusops	4
Streptophyta	Streptophyta_Incertae_sedis	Ericales	Sapotaceae	Neohemsleya	1
Streptophyta	Streptophyta_Incertae_sedis	Ericales	Sapotaceae	Neolemonniera	1
Streptophyta	Streptophyta_Incertae_sedis	Ericales	Sapotaceae	Nesoluma	2
Streptophyta	Streptophyta_Incertae_sedis	Ericales	Sapotaceae	Niemeyera	6
Streptophyta	Streptophyta_Incertae_sedis	Ericales	Sapotaceae	Northia	1
Streptophyta	Streptophyta_Incertae_sedis	Ericales	Sapotaceae	Omphalocarpum	2
Streptophyta	Streptophyta_Incertae_sedis	Ericales	Sapotaceae	Palaquium	6
Streptophyta	Streptophyta_Incertae_sedis	Ericales	Sapotaceae	Payena	2
Streptophyta	Streptophyta_Incertae_sedis	Ericales	Sapotaceae	Pichonia	8
Streptophyta	Streptophyta_Incertae_sedis	Ericales	Sapotaceae	Planchonella	71
Streptophyta	Streptophyta_Incertae_sedis	Ericales	Sapotaceae	Pleioluma	23
Streptophyta	Streptophyta_Incertae_sedis	Ericales	Sapotaceae	Pouteria	62
Streptophyta	Streptophyta_Incertae_sedis	Ericales	Sapotaceae	Pradosia	20
Streptophyta	Streptophyta_Incertae_sedis	Ericales	Sapotaceae	Pycnandra	55
Streptophyta	Streptophyta_Incertae_sedis	Ericales	Sapotaceae	Sapotaceae_Incertae_sedis	1
Streptophyta	Streptophyta_Incertae_sedis	Ericales	Sapotaceae	Sarcaulus	1
Streptophyta	Streptophyta_Incertae_sedis	Ericales	Sapotaceae	Sarcosperma	1
Streptophyta	Streptophyta_Incertae_sedis	Ericales	Sapotaceae	Sebertia	1
Streptophyta	Streptophyta_Incertae_sedis	Ericales	Sapotaceae	Sersalisia	2
Streptophyta	Streptophyta_Incertae_sedis	Ericales	Sapotaceae	Sideroxylon	46
Streptophyta	Streptophyta_Incertae_sedis	Ericales	Sapotaceae	Synsepalum	1
Streptophyta	Streptophyta_Incertae_sedis	Ericales	Sapotaceae	Tieghemella	1
Streptophyta	Streptophyta_Incertae_sedis	Ericales	Sapotaceae	Tsebona	1
Streptophyta	Streptophyta_Incertae_sedis	Ericales	Sapotaceae	Van-royena	1
Streptophyta	Streptophyta_Incertae_sedis	Ericales	Sapotaceae	Vitellaria	1
Streptophyta	Streptophyta_Incertae_sedis	Ericales	Sapotaceae	Vitellariopsis	1
Streptophyta	Streptophyta_Incertae_sedis	Ericales	Sapotaceae	Xantolis	2
Streptophyta	Streptophyta_Incertae_sedis	Ericales	Sarraceniaceae	Darlingtonia	1
Streptophyta	Streptophyta_Incertae_sedis	Ericales	Sarraceniaceae	Heliamphora	4
Streptophyta	Streptophyta_Incertae_sedis	Ericales	Sarraceniaceae	Sarracenia	10
Streptophyta	Streptophyta_Incertae_sedis	Ericales	Sladeniaceae	Sladenia	1
Streptophyta	Streptophyta_Incertae_sedis	Ericales	Styracaceae	Melliodendron	1
Streptophyta	Streptophyta_Incertae_sedis	Ericales	Styracaceae	Sinojackia	1
Streptophyta	Streptophyta_Incertae_sedis	Ericales	Styracaceae	Styrax	2
Streptophyta	Streptophyta_Incertae_sedis	Ericales	Symplocaceae	Symplocos	2
Streptophyta	Streptophyta_Incertae_sedis	Ericales	Theaceae	Apterosperma	1
Streptophyta	Streptophyta_Incertae_sedis	Ericales	Theaceae	Camellia	6
Streptophyta	Streptophyta_Incertae_sedis	Ericales	Theaceae	Franklinia	1
Streptophyta	Streptophyta_Incertae_sedis	Ericales	Theaceae	Gordonia	2
Streptophyta	Streptophyta_Incertae_sedis	Ericales	Theaceae	Laplacea	1
Streptophyta	Streptophyta_Incertae_sedis	Ericales	Theaceae	Polyspora	2
Streptophyta	Streptophyta_Incertae_sedis	Ericales	Theaceae	Pyrenaria	9
Streptophyta	Streptophyta_Incertae_sedis	Ericales	Theaceae	Schima	5
Streptophyta	Streptophyta_Incertae_sedis	Ericales	Theaceae	Stewartia	10
Streptophyta	Streptophyta_Incertae_sedis	Ericales	Theaceae	Tutcheria	1
Streptophyta	Streptophyta_Incertae_sedis	Fabales	Fabaceae	Abarema	1
Streptophyta	Streptophyta_Incertae_sedis	Fabales	Fabaceae	Abrus	1
Streptophyta	Streptophyta_Incertae_sedis	Fabales	Fabaceae	Acacia	53	1		1
Streptophyta	Streptophyta_Incertae_sedis	Fabales	Fabaceae	Adenolobus		1
Streptophyta	Streptophyta_Incertae_sedis	Fabales	Fabaceae	Afzelia	6
Streptophyta	Streptophyta_Incertae_sedis	Fabales	Fabaceae	Albizia	5
Streptophyta	Streptophyta_Incertae_sedis	Fabales	Fabaceae	Alhagi	2
Streptophyta	Streptophyta_Incertae_sedis	Fabales	Fabaceae	Amherstia	1
Streptophyta	Streptophyta_Incertae_sedis	Fabales	Fabaceae	Anadenanthera	1
Streptophyta	Streptophyta_Incertae_sedis	Fabales	Fabaceae	Ancistrotropis	1
Streptophyta	Streptophyta_Incertae_sedis	Fabales	Fabaceae	Andira	19
Streptophyta	Streptophyta_Incertae_sedis	Fabales	Fabaceae	Annea	1
Streptophyta	Streptophyta_Incertae_sedis	Fabales	Fabaceae	Anthonotha	5
Streptophyta	Streptophyta_Incertae_sedis	Fabales	Fabaceae	Anthyllis	2
Streptophyta	Streptophyta_Incertae_sedis	Fabales	Fabaceae	Aphanocalyx	9
Streptophyta	Streptophyta_Incertae_sedis	Fabales	Fabaceae	Arachis	1
Streptophyta	Streptophyta_Incertae_sedis	Fabales	Fabaceae	Archidendron	3
Streptophyta	Streptophyta_Incertae_sedis	Fabales	Fabaceae	Astragalus	1	12
Streptophyta	Streptophyta_Incertae_sedis	Fabales	Fabaceae	Augouardia	1
Streptophyta	Streptophyta_Incertae_sedis	Fabales	Fabaceae	Bauhinia		1
Streptophyta	Streptophyta_Incertae_sedis	Fabales	Fabaceae	Berlinia	10
Streptophyta	Streptophyta_Incertae_sedis	Fabales	Fabaceae	Bikinia	8			1
Streptophyta	Streptophyta_Incertae_sedis	Fabales	Fabaceae	Bionia	9
Streptophyta	Streptophyta_Incertae_sedis	Fabales	Fabaceae	Blanchetiodendron	1
Streptophyta	Streptophyta_Incertae_sedis	Fabales	Fabaceae	Bowdichia	2
Streptophyta	Streptophyta_Incertae_sedis	Fabales	Fabaceae	Brachystegia	4			1
Streptophyta	Streptophyta_Incertae_sedis	Fabales	Fabaceae	Brandzeia		1
Streptophyta	Streptophyta_Incertae_sedis	Fabales	Fabaceae	Brownea	5
Streptophyta	Streptophyta_Incertae_sedis	Fabales	Fabaceae	Browneopsis	2
Streptophyta	Streptophyta_Incertae_sedis	Fabales	Fabaceae	Butea	1
Streptophyta	Streptophyta_Incertae_sedis	Fabales	Fabaceae	Caesalpinia	3
Streptophyta	Streptophyta_Incertae_sedis	Fabales	Fabaceae	Callerya	2
Streptophyta	Streptophyta_Incertae_sedis	Fabales	Fabaceae	Calliandra	42	1			4
Streptophyta	Streptophyta_Incertae_sedis	Fabales	Fabaceae	Camptosema	6
Streptophyta	Streptophyta_Incertae_sedis	Fabales	Fabaceae	Canavalia	5
Streptophyta	Streptophyta_Incertae_sedis	Fabales	Fabaceae	Caragana	7
Streptophyta	Streptophyta_Incertae_sedis	Fabales	Fabaceae	Cassia	2
Streptophyta	Streptophyta_Incertae_sedis	Fabales	Fabaceae	Cercis		1
Streptophyta	Streptophyta_Incertae_sedis	Fabales	Fabaceae	Chadsia	1
Streptophyta	Streptophyta_Incertae_sedis	Fabales	Fabaceae	Chamaecrista	7				1
Streptophyta	Streptophyta_Incertae_sedis	Fabales	Fabaceae	Chloroleucon	7
Streptophyta	Streptophyta_Incertae_sedis	Fabales	Fabaceae	Cicer		2
Streptophyta	Streptophyta_Incertae_sedis	Fabales	Fabaceae	Cleobulia	1
Streptophyta	Streptophyta_Incertae_sedis	Fabales	Fabaceae	Cochliasanthus	1
Streptophyta	Streptophyta_Incertae_sedis	Fabales	Fabaceae	Cojoba	1
Streptophyta	Streptophyta_Incertae_sedis	Fabales	Fabaceae	Collaea	3
Streptophyta	Streptophyta_Incertae_sedis	Fabales	Fabaceae	Colophospermum	1
Streptophyta	Streptophyta_Incertae_sedis	Fabales	Fabaceae	Coronilla	4
Streptophyta	Streptophyta_Incertae_sedis	Fabales	Fabaceae	Craspedolobium	1
Streptophyta	Streptophyta_Incertae_sedis	Fabales	Fabaceae	Cratylia	3
Streptophyta	Streptophyta_Incertae_sedis	Fabales	Fabaceae	Crotalaria	58
Streptophyta	Streptophyta_Incertae_sedis	Fabales	Fabaceae	Crudia	3	1
Streptophyta	Streptophyta_Incertae_sedis	Fabales	Fabaceae	Cryptosepalum	1
Streptophyta	Streptophyta_Incertae_sedis	Fabales	Fabaceae	Cyamopsis	2
Streptophyta	Streptophyta_Incertae_sedis	Fabales	Fabaceae	Cyathostegia	1
Streptophyta	Streptophyta_Incertae_sedis	Fabales	Fabaceae	Cymbosema	1
Streptophyta	Streptophyta_Incertae_sedis	Fabales	Fabaceae	Cynometra	5
Streptophyta	Streptophyta_Incertae_sedis	Fabales	Fabaceae	Dalbergia	4
Streptophyta	Streptophyta_Incertae_sedis	Fabales	Fabaceae	Daniellia	3
Streptophyta	Streptophyta_Incertae_sedis	Fabales	Fabaceae	Dendrolobium	1
Streptophyta	Streptophyta_Incertae_sedis	Fabales	Fabaceae	Desmodium	1
Streptophyta	Streptophyta_Incertae_sedis	Fabales	Fabaceae	Dicymbe	2
Streptophyta	Streptophyta_Incertae_sedis	Fabales	Fabaceae	Didelotia	3
Streptophyta	Streptophyta_Incertae_sedis	Fabales	Fabaceae	Dimorphandra	1
Streptophyta	Streptophyta_Incertae_sedis	Fabales	Fabaceae	Dioclea	18	1
Streptophyta	Streptophyta_Incertae_sedis	Fabales	Fabaceae	Diplotropis	2
Streptophyta	Streptophyta_Incertae_sedis	Fabales	Fabaceae	Duparquetia	1
Streptophyta	Streptophyta_Incertae_sedis	Fabales	Fabaceae	Ebenopsis	1
Streptophyta	Streptophyta_Incertae_sedis	Fabales	Fabaceae	Ecuadendron	1
Streptophyta	Streptophyta_Incertae_sedis	Fabales	Fabaceae	Englerodendron	2
Streptophyta	Streptophyta_Incertae_sedis	Fabales	Fabaceae	Enterolobium	3
Streptophyta	Streptophyta_Incertae_sedis	Fabales	Fabaceae	Eperua	3
Streptophyta	Streptophyta_Incertae_sedis	Fabales	Fabaceae	Erythrina	3
Streptophyta	Streptophyta_Incertae_sedis	Fabales	Fabaceae	Erythrophleum	1
Streptophyta	Streptophyta_Incertae_sedis	Fabales	Fabaceae	Erythrostemon	2
Streptophyta	Streptophyta_Incertae_sedis	Fabales	Fabaceae	Eurypetalum	2
Streptophyta	Streptophyta_Incertae_sedis	Fabales	Fabaceae	Exostyles	2
Streptophyta	Streptophyta_Incertae_sedis	Fabales	Fabaceae	Flemingia	4
Streptophyta	Streptophyta_Incertae_sedis	Fabales	Fabaceae	Fordia	1
Streptophyta	Streptophyta_Incertae_sedis	Fabales	Fabaceae	Gabonius	1
Streptophyta	Streptophyta_Incertae_sedis	Fabales	Fabaceae	Galactia	29
Streptophyta	Streptophyta_Incertae_sedis	Fabales	Fabaceae	Galega		2
Streptophyta	Streptophyta_Incertae_sedis	Fabales	Fabaceae	Genista	1
Streptophyta	Streptophyta_Incertae_sedis	Fabales	Fabaceae	Gilbertiodendron	28
Streptophyta	Streptophyta_Incertae_sedis	Fabales	Fabaceae	Gilletiodendron	1
Streptophyta	Streptophyta_Incertae_sedis	Fabales	Fabaceae	Gleditsia	1
Streptophyta	Streptophyta_Incertae_sedis	Fabales	Fabaceae	Glycine	2
Streptophyta	Streptophyta_Incertae_sedis	Fabales	Fabaceae	Glycyrrhiza	4
Streptophyta	Streptophyta_Incertae_sedis	Fabales	Fabaceae	Guianodendron	1
Streptophyta	Streptophyta_Incertae_sedis	Fabales	Fabaceae	Guibourtia	1
Streptophyta	Streptophyta_Incertae_sedis	Fabales	Fabaceae	Harleyodendron	1
Streptophyta	Streptophyta_Incertae_sedis	Fabales	Fabaceae	Havardia	1				1
Streptophyta	Streptophyta_Incertae_sedis	Fabales	Fabaceae	Hedysarum		1
Streptophyta	Streptophyta_Incertae_sedis	Fabales	Fabaceae	Helicotropis	1
Streptophyta	Streptophyta_Incertae_sedis	Fabales	Fabaceae	Hesperothamnus	1
Streptophyta	Streptophyta_Incertae_sedis	Fabales	Fabaceae	Heterostemon	1
Streptophyta	Streptophyta_Incertae_sedis	Fabales	Fabaceae	Hippocrepis	3
Streptophyta	Streptophyta_Incertae_sedis	Fabales	Fabaceae	Holocalyx	1
Streptophyta	Streptophyta_Incertae_sedis	Fabales	Fabaceae	Humboldtia	4
Streptophyta	Streptophyta_Incertae_sedis	Fabales	Fabaceae	Hylodendron	1
Streptophyta	Streptophyta_Incertae_sedis	Fabales	Fabaceae	Hymenaea	3
Streptophyta	Streptophyta_Incertae_sedis	Fabales	Fabaceae	Hymenolobium	3
Streptophyta	Streptophyta_Incertae_sedis	Fabales	Fabaceae	Hymenostegia	5
Streptophyta	Streptophyta_Incertae_sedis	Fabales	Fabaceae	Icuria	1
Streptophyta	Streptophyta_Incertae_sedis	Fabales	Fabaceae	Indigastrum	1
Streptophyta	Streptophyta_Incertae_sedis	Fabales	Fabaceae	Indigofera	6				1
Streptophyta	Streptophyta_Incertae_sedis	Fabales	Fabaceae	Inga	3
Streptophyta	Streptophyta_Incertae_sedis	Fabales	Fabaceae	Intsia	2
Streptophyta	Streptophyta_Incertae_sedis	Fabales	Fabaceae	Isoberlinia	3
Streptophyta	Streptophyta_Incertae_sedis	Fabales	Fabaceae	Julbernardia	5
Streptophyta	Streptophyta_Incertae_sedis	Fabales	Fabaceae	Kingiodendron	2
Streptophyta	Streptophyta_Incertae_sedis	Fabales	Fabaceae	Kotschya	1
Streptophyta	Streptophyta_Incertae_sedis	Fabales	Fabaceae	Lablab	1
Streptophyta	Streptophyta_Incertae_sedis	Fabales	Fabaceae	Lackeya	1
Streptophyta	Streptophyta_Incertae_sedis	Fabales	Fabaceae	Lathyrus		13
Streptophyta	Streptophyta_Incertae_sedis	Fabales	Fabaceae	Lecointea	1
Streptophyta	Streptophyta_Incertae_sedis	Fabales	Fabaceae	Lens		1
Streptophyta	Streptophyta_Incertae_sedis	Fabales	Fabaceae	Leonardoxa	1
Streptophyta	Streptophyta_Incertae_sedis	Fabales	Fabaceae	Leptolobium	9
Streptophyta	Streptophyta_Incertae_sedis	Fabales	Fabaceae	Leucochloron	5
Streptophyta	Streptophyta_Incertae_sedis	Fabales	Fabaceae	Libidibia	1
Streptophyta	Streptophyta_Incertae_sedis	Fabales	Fabaceae	Librevillea	1
Streptophyta	Streptophyta_Incertae_sedis	Fabales	Fabaceae	Loesenera	1
Streptophyta	Streptophyta_Incertae_sedis	Fabales	Fabaceae	Lonchocarpus	32
Streptophyta	Streptophyta_Incertae_sedis	Fabales	Fabaceae	Lotus	13
Streptophyta	Streptophyta_Incertae_sedis	Fabales	Fabaceae	Luetzelburgia	13
Streptophyta	Streptophyta_Incertae_sedis	Fabales	Fabaceae	Lysidice	1
Streptophyta	Streptophyta_Incertae_sedis	Fabales	Fabaceae	Macrolobium	9
Streptophyta	Streptophyta_Incertae_sedis	Fabales	Fabaceae	Macrosamanea	1
Streptophyta	Streptophyta_Incertae_sedis	Fabales	Fabaceae	Medicago		24
Streptophyta	Streptophyta_Incertae_sedis	Fabales	Fabaceae	Melilotus		5
Streptophyta	Streptophyta_Incertae_sedis	Fabales	Fabaceae	Mezoneuron	1
Streptophyta	Streptophyta_Incertae_sedis	Fabales	Fabaceae	Microberlinia	2
Streptophyta	Streptophyta_Incertae_sedis	Fabales	Fabaceae	Microcharis		2
Streptophyta	Streptophyta_Incertae_sedis	Fabales	Fabaceae	Microlobius	1
Streptophyta	Streptophyta_Incertae_sedis	Fabales	Fabaceae	Millettia	6
Streptophyta	Streptophyta_Incertae_sedis	Fabales	Fabaceae	Mimosa	7	1
Streptophyta	Streptophyta_Incertae_sedis	Fabales	Fabaceae	Muellera	1					1
Streptophyta	Streptophyta_Incertae_sedis	Fabales	Fabaceae	Normandiodendron	1
Streptophyta	Streptophyta_Incertae_sedis	Fabales	Fabaceae	Oddoniodendron	2
Streptophyta	Streptophyta_Incertae_sedis	Fabales	Fabaceae	Onobrychis		2
Streptophyta	Streptophyta_Incertae_sedis	Fabales	Fabaceae	Ononis		5
Streptophyta	Streptophyta_Incertae_sedis	Fabales	Fabaceae	Ornithopus	2
Streptophyta	Streptophyta_Incertae_sedis	Fabales	Fabaceae	Oxytropis	7
Streptophyta	Streptophyta_Incertae_sedis	Fabales	Fabaceae	Paloue						1
Streptophyta	Streptophyta_Incertae_sedis	Fabales	Fabaceae	Paramacrolobium	1
Streptophyta	Streptophyta_Incertae_sedis	Fabales	Fabaceae	Parochetus	1
Streptophyta	Streptophyta_Incertae_sedis	Fabales	Fabaceae	Peltogyne	3
Streptophyta	Streptophyta_Incertae_sedis	Fabales	Fabaceae	Phanera		2
Streptophyta	Streptophyta_Incertae_sedis	Fabales	Fabaceae	Phaseolus	6
Streptophyta	Streptophyta_Incertae_sedis	Fabales	Fabaceae	Phyllodium	1
Streptophyta	Streptophyta_Incertae_sedis	Fabales	Fabaceae	Phylloxylon	2
Streptophyta	Streptophyta_Incertae_sedis	Fabales	Fabaceae	Pisum		1
Streptophyta	Streptophyta_Incertae_sedis	Fabales	Fabaceae	Pityrocarpa	1
Streptophyta	Streptophyta_Incertae_sedis	Fabales	Fabaceae	Plagiosiphon	3
Streptophyta	Streptophyta_Incertae_sedis	Fabales	Fabaceae	Prioria	3
Streptophyta	Streptophyta_Incertae_sedis	Fabales	Fabaceae	Pseudosamanea	1
Streptophyta	Streptophyta_Incertae_sedis	Fabales	Fabaceae	Pueraria	2
Streptophyta	Streptophyta_Incertae_sedis	Fabales	Fabaceae	Rafnia	8
Streptophyta	Streptophyta_Incertae_sedis	Fabales	Fabaceae	Rhodopis	1
Streptophyta	Streptophyta_Incertae_sedis	Fabales	Fabaceae	Rhynchosia	1
Streptophyta	Streptophyta_Incertae_sedis	Fabales	Fabaceae	Rhynchotropis	1
Streptophyta	Streptophyta_Incertae_sedis	Fabales	Fabaceae	Samanea		1
Streptophyta	Streptophyta_Incertae_sedis	Fabales	Fabaceae	Saraca	2
Streptophyta	Streptophyta_Incertae_sedis	Fabales	Fabaceae	Schotia	3
Streptophyta	Streptophyta_Incertae_sedis	Fabales	Fabaceae	Senegalia	6	1
Streptophyta	Streptophyta_Incertae_sedis	Fabales	Fabaceae	Senna	7
Streptophyta	Streptophyta_Incertae_sedis	Fabales	Fabaceae	Sindora	2
Streptophyta	Streptophyta_Incertae_sedis	Fabales	Fabaceae	Sophora	2
Streptophyta	Streptophyta_Incertae_sedis	Fabales	Fabaceae	Spatholobus	1
Streptophyta	Streptophyta_Incertae_sedis	Fabales	Fabaceae	Sphinga					1
Streptophyta	Streptophyta_Incertae_sedis	Fabales	Fabaceae	Stryphnodendron	12
Streptophyta	Streptophyta_Incertae_sedis	Fabales	Fabaceae	Sweetia	1
Streptophyta	Streptophyta_Incertae_sedis	Fabales	Fabaceae	Talbotiella	1
Streptophyta	Streptophyta_Incertae_sedis	Fabales	Fabaceae	Tamarindus	1
Streptophyta	Streptophyta_Incertae_sedis	Fabales	Fabaceae	Tephrosia	3
Streptophyta	Streptophyta_Incertae_sedis	Fabales	Fabaceae	Tessmannia	3
Streptophyta	Streptophyta_Incertae_sedis	Fabales	Fabaceae	Tetraberlinia	5
Streptophyta	Streptophyta_Incertae_sedis	Fabales	Fabaceae	Thailentadopsis	1
Streptophyta	Streptophyta_Incertae_sedis	Fabales	Fabaceae	Trifolium		224
Streptophyta	Streptophyta_Incertae_sedis	Fabales	Fabaceae	Trigonella		8
Streptophyta	Streptophyta_Incertae_sedis	Fabales	Fabaceae	Ulex	1
Streptophyta	Streptophyta_Incertae_sedis	Fabales	Fabaceae	Uraria	1
Streptophyta	Streptophyta_Incertae_sedis	Fabales	Fabaceae	Vachellia	10					1
Streptophyta	Streptophyta_Incertae_sedis	Fabales	Fabaceae	Vatairea	8
Streptophyta	Streptophyta_Incertae_sedis	Fabales	Fabaceae	Vataireopsis	4
Streptophyta	Streptophyta_Incertae_sedis	Fabales	Fabaceae	Vaughania	1
Streptophyta	Streptophyta_Incertae_sedis	Fabales	Fabaceae	Vicia		64
Streptophyta	Streptophyta_Incertae_sedis	Fabales	Fabaceae	Vigna	33
Streptophyta	Streptophyta_Incertae_sedis	Fabales	Fabaceae	Viguieranthus	4
Streptophyta	Streptophyta_Incertae_sedis	Fabales	Fabaceae	Wisteria	1
Streptophyta	Streptophyta_Incertae_sedis	Fabales	Fabaceae	Zapoteca	6
Streptophyta	Streptophyta_Incertae_sedis	Fabales	Fabaceae	Zenkerella	1
Streptophyta	Streptophyta_Incertae_sedis	Fabales	Fabaceae	Zollernia	1
Streptophyta	Streptophyta_Incertae_sedis	Fabales	Fabaceae	Zygia									1
Streptophyta	Streptophyta_Incertae_sedis	Fabales	Polygalaceae	Polygala	2
Streptophyta	Streptophyta_Incertae_sedis	Fabales	Polygalaceae	Xanthophyllum	3
Streptophyta	Streptophyta_Incertae_sedis	Fagales	Betulaceae	Alnus	1
Streptophyta	Streptophyta_Incertae_sedis	Fagales	Betulaceae	Betula		3
Streptophyta	Streptophyta_Incertae_sedis	Fagales	Betulaceae	Carpinus		1
Streptophyta	Streptophyta_Incertae_sedis	Fagales	Fagaceae	Quercus	3
Streptophyta	Streptophyta_Incertae_sedis	Fagales	Juglandaceae	Engelhardia		2
Streptophyta	Streptophyta_Incertae_sedis	Fagales	Juglandaceae	Juglans		1
Streptophyta	Streptophyta_Incertae_sedis	Garryales	Garryaceae	Aucuba	1
Streptophyta	Streptophyta_Incertae_sedis	Gentianales	Apocynaceae	Alstonia	2
Streptophyta	Streptophyta_Incertae_sedis	Gentianales	Apocynaceae	Anodendron	1
Streptophyta	Streptophyta_Incertae_sedis	Gentianales	Apocynaceae	Apocynum	2
Streptophyta	Streptophyta_Incertae_sedis	Gentianales	Apocynaceae	Asclepias	11
Streptophyta	Streptophyta_Incertae_sedis	Gentianales	Apocynaceae	Aspidosperma	1
Streptophyta	Streptophyta_Incertae_sedis	Gentianales	Apocynaceae	Cerbera	1
Streptophyta	Streptophyta_Incertae_sedis	Gentianales	Apocynaceae	Cynanchum	1
Streptophyta	Streptophyta_Incertae_sedis	Gentianales	Apocynaceae	Decalepis	3
Streptophyta	Streptophyta_Incertae_sedis	Gentianales	Apocynaceae	Hemidesmus	1
Streptophyta	Streptophyta_Incertae_sedis	Gentianales	Apocynaceae	Holarrhena	1
Streptophyta	Streptophyta_Incertae_sedis	Gentianales	Apocynaceae	Micrechites	1
Streptophyta	Streptophyta_Incertae_sedis	Gentianales	Apocynaceae	Ochrosia	1
Streptophyta	Streptophyta_Incertae_sedis	Gentianales	Apocynaceae	Plumeria	2
Streptophyta	Streptophyta_Incertae_sedis	Gentianales	Apocynaceae	Rauvolfia	2
Streptophyta	Streptophyta_Incertae_sedis	Gentianales	Apocynaceae	Secamone	1
Streptophyta	Streptophyta_Incertae_sedis	Gentianales	Apocynaceae	Tabernaemontana	2	1
Streptophyta	Streptophyta_Incertae_sedis	Gentianales	Apocynaceae	Trachelospermum	1
Streptophyta	Streptophyta_Incertae_sedis	Gentianales	Apocynaceae	Urceola	3
Streptophyta	Streptophyta_Incertae_sedis	Gentianales	Apocynaceae	Wrightia	3
Streptophyta	Streptophyta_Incertae_sedis	Gentianales	Gentianaceae	Blackstonia	1
Streptophyta	Streptophyta_Incertae_sedis	Gentianales	Gentianaceae	Centaurium	5
Streptophyta	Streptophyta_Incertae_sedis	Gentianales	Gentianaceae	Cicendia	1
Streptophyta	Streptophyta_Incertae_sedis	Gentianales	Gentianaceae	Comastoma	1
Streptophyta	Streptophyta_Incertae_sedis	Gentianales	Gentianaceae	Gentiana	5
Streptophyta	Streptophyta_Incertae_sedis	Gentianales	Gentianaceae	Gentianella	1
Streptophyta	Streptophyta_Incertae_sedis	Gentianales	Gentianaceae	Gentianopsis	3
Streptophyta	Streptophyta_Incertae_sedis	Gentianales	Gentianaceae	Lomatogonium	1
Streptophyta	Streptophyta_Incertae_sedis	Gentianales	Loganiaceae	Strychnos	5
Streptophyta	Streptophyta_Incertae_sedis	Gentianales	Rubiaceae	Acrosynanthus	1
Streptophyta	Streptophyta_Incertae_sedis	Gentianales	Rubiaceae	Agathisanthemum	2
Streptophyta	Streptophyta_Incertae_sedis	Gentianales	Rubiaceae	Aidia	2
Streptophyta	Streptophyta_Incertae_sedis	Gentianales	Rubiaceae	Aleisanthiopsis	1
Streptophyta	Streptophyta_Incertae_sedis	Gentianales	Rubiaceae	Amphiasma	2
Streptophyta	Streptophyta_Incertae_sedis	Gentianales	Rubiaceae	Arcytophyllum	3
Streptophyta	Streptophyta_Incertae_sedis	Gentianales	Rubiaceae	Asperula	51	1
Streptophyta	Streptophyta_Incertae_sedis	Gentianales	Rubiaceae	Batopedina	1
Streptophyta	Streptophyta_Incertae_sedis	Gentianales	Rubiaceae	Benkara	1
Streptophyta	Streptophyta_Incertae_sedis	Gentianales	Rubiaceae	Borreria	7
Streptophyta	Streptophyta_Incertae_sedis	Gentianales	Rubiaceae	Bouvardia	1
Streptophyta	Streptophyta_Incertae_sedis	Gentianales	Rubiaceae	Breonia	1
Streptophyta	Streptophyta_Incertae_sedis	Gentianales	Rubiaceae	Canthium	2
Streptophyta	Streptophyta_Incertae_sedis	Gentianales	Rubiaceae	Carajasia	1
Streptophyta	Streptophyta_Incertae_sedis	Gentianales	Rubiaceae	Carphalea	4
Streptophyta	Streptophyta_Incertae_sedis	Gentianales	Rubiaceae	Chamaepentas	2
Streptophyta	Streptophyta_Incertae_sedis	Gentianales	Rubiaceae	Chassalia	1
Streptophyta	Streptophyta_Incertae_sedis	Gentianales	Rubiaceae	Chlorochorion	2
Streptophyta	Streptophyta_Incertae_sedis	Gentianales	Rubiaceae	Coffea	4
Streptophyta	Streptophyta_Incertae_sedis	Gentianales	Rubiaceae	Conostomium	3
Streptophyta	Streptophyta_Incertae_sedis	Gentianales	Rubiaceae	Cordylostigma	4
Streptophyta	Streptophyta_Incertae_sedis	Gentianales	Rubiaceae	Crusea	3
Streptophyta	Streptophyta_Incertae_sedis	Gentianales	Rubiaceae	Dentella	1
Streptophyta	Streptophyta_Incertae_sedis	Gentianales	Rubiaceae	Dibrachionostylus	1
Streptophyta	Streptophyta_Incertae_sedis	Gentianales	Rubiaceae	Dimetia	1
Streptophyta	Streptophyta_Incertae_sedis	Gentianales	Rubiaceae	Diodella	3
Streptophyta	Streptophyta_Incertae_sedis	Gentianales	Rubiaceae	Diodia	6
Streptophyta	Streptophyta_Incertae_sedis	Gentianales	Rubiaceae	Dirichletia	1
Streptophyta	Streptophyta_Incertae_sedis	Gentianales	Rubiaceae	Dolichopentas	3
Streptophyta	Streptophyta_Incertae_sedis	Gentianales	Rubiaceae	Duperrea	1
Streptophyta	Streptophyta_Incertae_sedis	Gentianales	Rubiaceae	Edrastima	2
Streptophyta	Streptophyta_Incertae_sedis	Gentianales	Rubiaceae	Emmenopterys	1
Streptophyta	Streptophyta_Incertae_sedis	Gentianales	Rubiaceae	Emmeorhiza	1
Streptophyta	Streptophyta_Incertae_sedis	Gentianales	Rubiaceae	Ernodea	2
Streptophyta	Streptophyta_Incertae_sedis	Gentianales	Rubiaceae	Exostema	1
Streptophyta	Streptophyta_Incertae_sedis	Gentianales	Rubiaceae	Galianthe	5
Streptophyta	Streptophyta_Incertae_sedis	Gentianales	Rubiaceae	Galium		1
Streptophyta	Streptophyta_Incertae_sedis	Gentianales	Rubiaceae	Gardenia	1	1
Streptophyta	Streptophyta_Incertae_sedis	Gentianales	Rubiaceae	Greeniopsis	6
Streptophyta	Streptophyta_Incertae_sedis	Gentianales	Rubiaceae	Guettarda	1
Streptophyta	Streptophyta_Incertae_sedis	Gentianales	Rubiaceae	Gynochthodes	1
Streptophyta	Streptophyta_Incertae_sedis	Gentianales	Rubiaceae	Hamelia			1
Streptophyta	Streptophyta_Incertae_sedis	Gentianales	Rubiaceae	Hedyotis	7
Streptophyta	Streptophyta_Incertae_sedis	Gentianales	Rubiaceae	Hedythyrsus	1
Streptophyta	Streptophyta_Incertae_sedis	Gentianales	Rubiaceae	Hintonia	2
Streptophyta	Streptophyta_Incertae_sedis	Gentianales	Rubiaceae	Houstonia	2
Streptophyta	Streptophyta_Incertae_sedis	Gentianales	Rubiaceae	Ixora	1
Streptophyta	Streptophyta_Incertae_sedis	Gentianales	Rubiaceae	Kadua	7
Streptophyta	Streptophyta_Incertae_sedis	Gentianales	Rubiaceae	Knoxia	2
Streptophyta	Streptophyta_Incertae_sedis	Gentianales	Rubiaceae	Kohautia	5
Streptophyta	Streptophyta_Incertae_sedis	Gentianales	Rubiaceae	Lasianthus	3
Streptophyta	Streptophyta_Incertae_sedis	Gentianales	Rubiaceae	Leptodermis	1
Streptophyta	Streptophyta_Incertae_sedis	Gentianales	Rubiaceae	Manettia	3
Streptophyta	Streptophyta_Incertae_sedis	Gentianales	Rubiaceae	Mitracarpus	28								1
Streptophyta	Streptophyta_Incertae_sedis	Gentianales	Rubiaceae	Mitragyna	1
Streptophyta	Streptophyta_Incertae_sedis	Gentianales	Rubiaceae	Mitrasacmopsis	1
Streptophyta	Streptophyta_Incertae_sedis	Gentianales	Rubiaceae	Morinda	1
Streptophyta	Streptophyta_Incertae_sedis	Gentianales	Rubiaceae	Mussaenda	2
Streptophyta	Streptophyta_Incertae_sedis	Gentianales	Rubiaceae	Mycetia	2
Streptophyta	Streptophyta_Incertae_sedis	Gentianales	Rubiaceae	Neolamarckia	1
Streptophyta	Streptophyta_Incertae_sedis	Gentianales	Rubiaceae	Neonauclea	3
Streptophyta	Streptophyta_Incertae_sedis	Gentianales	Rubiaceae	Oldenlandia	27
Streptophyta	Streptophyta_Incertae_sedis	Gentianales	Rubiaceae	Otiophora	11
Streptophyta	Streptophyta_Incertae_sedis	Gentianales	Rubiaceae	Otomeria	3
Streptophyta	Streptophyta_Incertae_sedis	Gentianales	Rubiaceae	Paracarphalea	3
Streptophyta	Streptophyta_Incertae_sedis	Gentianales	Rubiaceae	Paraknoxia	1
Streptophyta	Streptophyta_Incertae_sedis	Gentianales	Rubiaceae	Parapentas	2
Streptophyta	Streptophyta_Incertae_sedis	Gentianales	Rubiaceae	Paratriaina	1
Streptophyta	Streptophyta_Incertae_sedis	Gentianales	Rubiaceae	Pavetta	2
Streptophyta	Streptophyta_Incertae_sedis	Gentianales	Rubiaceae	Pentanisia	11
Streptophyta	Streptophyta_Incertae_sedis	Gentianales	Rubiaceae	Pentanopsis	1
Streptophyta	Streptophyta_Incertae_sedis	Gentianales	Rubiaceae	Pentas	11
Streptophyta	Streptophyta_Incertae_sedis	Gentianales	Rubiaceae	Pentodon	1
Streptophyta	Streptophyta_Incertae_sedis	Gentianales	Rubiaceae	Phyllopentas	8
Streptophyta	Streptophyta_Incertae_sedis	Gentianales	Rubiaceae	Phylohydrax	2
Streptophyta	Streptophyta_Incertae_sedis	Gentianales	Rubiaceae	Placopoda	1
Streptophyta	Streptophyta_Incertae_sedis	Gentianales	Rubiaceae	Psyllocarpus	1
Streptophyta	Streptophyta_Incertae_sedis	Gentianales	Rubiaceae	Rhodopentas	2
Streptophyta	Streptophyta_Incertae_sedis	Gentianales	Rubiaceae	Richardia	5
Streptophyta	Streptophyta_Incertae_sedis	Gentianales	Rubiaceae	Rondeletia	1
Streptophyta	Streptophyta_Incertae_sedis	Gentianales	Rubiaceae	Rubia	1
Streptophyta	Streptophyta_Incertae_sedis	Gentianales	Rubiaceae	Saprosma	1
Streptophyta	Streptophyta_Incertae_sedis	Gentianales	Rubiaceae	Schizomussaenda	1
Streptophyta	Streptophyta_Incertae_sedis	Gentianales	Rubiaceae	Schwendenera	1
Streptophyta	Streptophyta_Incertae_sedis	Gentianales	Rubiaceae	Sherardia	1
Streptophyta	Streptophyta_Incertae_sedis	Gentianales	Rubiaceae	Spermacoce	13
Streptophyta	Streptophyta_Incertae_sedis	Gentianales	Rubiaceae	Staelia	3
Streptophyta	Streptophyta_Incertae_sedis	Gentianales	Rubiaceae	Stenaria	1
Streptophyta	Streptophyta_Incertae_sedis	Gentianales	Rubiaceae	Tarennoidea	1
Streptophyta	Streptophyta_Incertae_sedis	Gentianales	Rubiaceae	Thecorchus	1
Streptophyta	Streptophyta_Incertae_sedis	Gentianales	Rubiaceae	Triainolepis	7
Streptophyta	Streptophyta_Incertae_sedis	Gentianales	Rubiaceae	Tricalysia	2
Streptophyta	Streptophyta_Incertae_sedis	Gentianales	Rubiaceae	Uncaria	3
Streptophyta	Streptophyta_Incertae_sedis	Gentianales	Rubiaceae	Urophyllum	1
Streptophyta	Streptophyta_Incertae_sedis	Gentianales	Rubiaceae	Wendlandia	2
Streptophyta	Streptophyta_Incertae_sedis	Geraniales	Geraniaceae	Erodium		7
Streptophyta	Streptophyta_Incertae_sedis	Geraniales	Geraniaceae	Geranium		2
Streptophyta	Streptophyta_Incertae_sedis	Geraniales	Geraniaceae	Monsonia	1
Streptophyta	Streptophyta_Incertae_sedis	Ginkgoales	Ginkgoaceae	Ginkgo	1
Streptophyta	Streptophyta_Incertae_sedis	Gnetales	Gnetaceae	Gnetum	18
Streptophyta	Streptophyta_Incertae_sedis	Gunnerales	Gunneraceae	Gunnera	6			8
Streptophyta	Streptophyta_Incertae_sedis	Huerteales	Tapisciaceae	Tapiscia	1
Streptophyta	Streptophyta_Incertae_sedis	Icacinales	Icacinaceae	Icacinaceae_Incertae_sedis	2
Streptophyta	Streptophyta_Incertae_sedis	Incertae_sedis	Incertae_sedis	Incertae_sedis		1
Streptophyta	Streptophyta_Incertae_sedis	Lamiales	Acanthaceae	Acanthus	1
Streptophyta	Streptophyta_Incertae_sedis	Lamiales	Acanthaceae	Anisosepalum	1
Streptophyta	Streptophyta_Incertae_sedis	Lamiales	Acanthaceae	Avicennia	2
Streptophyta	Streptophyta_Incertae_sedis	Lamiales	Acanthaceae	Elytraria	7
Streptophyta	Streptophyta_Incertae_sedis	Lamiales	Acanthaceae	Gynocraterium	1
Streptophyta	Streptophyta_Incertae_sedis	Lamiales	Acanthaceae	Nelsonia	3
Streptophyta	Streptophyta_Incertae_sedis	Lamiales	Acanthaceae	Ophiorrhiziphyllon	1
Streptophyta	Streptophyta_Incertae_sedis	Lamiales	Acanthaceae	Ruellia	4
Streptophyta	Streptophyta_Incertae_sedis	Lamiales	Acanthaceae	Saintpauliopsis	1
Streptophyta	Streptophyta_Incertae_sedis	Lamiales	Acanthaceae	Staurogyne	19
Streptophyta	Streptophyta_Incertae_sedis	Lamiales	Acanthaceae	Strobilanthes	1
Streptophyta	Streptophyta_Incertae_sedis	Lamiales	Acanthaceae	Thunbergia	7
Streptophyta	Streptophyta_Incertae_sedis	Lamiales	Bignoniaceae	Markhamia	1
Streptophyta	Streptophyta_Incertae_sedis	Lamiales	Bignoniaceae	Mayodendron	1
Streptophyta	Streptophyta_Incertae_sedis	Lamiales	Bignoniaceae	Oroxylum	1
Streptophyta	Streptophyta_Incertae_sedis	Lamiales	Bignoniaceae	Radermachera	2
Streptophyta	Streptophyta_Incertae_sedis	Lamiales	Bignoniaceae	Stereospermum	1
Streptophyta	Streptophyta_Incertae_sedis	Lamiales	Bignoniaceae	Tabebuia	2
Streptophyta	Streptophyta_Incertae_sedis	Lamiales	Bignoniaceae	Tecomella	1
Streptophyta	Streptophyta_Incertae_sedis	Lamiales	Carlemanniaceae	Silvianthus	1
Streptophyta	Streptophyta_Incertae_sedis	Lamiales	Gesneriaceae	Aeschynanthus	3
Streptophyta	Streptophyta_Incertae_sedis	Lamiales	Gesneriaceae	Alsobia	2
Streptophyta	Streptophyta_Incertae_sedis	Lamiales	Gesneriaceae	Anetanthus	1
Streptophyta	Streptophyta_Incertae_sedis	Lamiales	Gesneriaceae	Anna	1
Streptophyta	Streptophyta_Incertae_sedis	Lamiales	Gesneriaceae	Beccarinda	1
Streptophyta	Streptophyta_Incertae_sedis	Lamiales	Gesneriaceae	Besleria	6
Streptophyta	Streptophyta_Incertae_sedis	Lamiales	Gesneriaceae	Boea	1
Streptophyta	Streptophyta_Incertae_sedis	Lamiales	Gesneriaceae	Chayamaritia	1
Streptophyta	Streptophyta_Incertae_sedis	Lamiales	Gesneriaceae	Chrysothemis	1
Streptophyta	Streptophyta_Incertae_sedis	Lamiales	Gesneriaceae	Codonanthopsis	1
Streptophyta	Streptophyta_Incertae_sedis	Lamiales	Gesneriaceae	Columnea		23
Streptophyta	Streptophyta_Incertae_sedis	Lamiales	Gesneriaceae	Corallodiscus	1
Streptophyta	Streptophyta_Incertae_sedis	Lamiales	Gesneriaceae	Coronanthera	1
Streptophyta	Streptophyta_Incertae_sedis	Lamiales	Gesneriaceae	Cremosperma	1
Streptophyta	Streptophyta_Incertae_sedis	Lamiales	Gesneriaceae	Cyrtandra	9
Streptophyta	Streptophyta_Incertae_sedis	Lamiales	Gesneriaceae	Damrongia	5
Streptophyta	Streptophyta_Incertae_sedis	Lamiales	Gesneriaceae	Diastema	1
Streptophyta	Streptophyta_Incertae_sedis	Lamiales	Gesneriaceae	Didissandra	4
Streptophyta	Streptophyta_Incertae_sedis	Lamiales	Gesneriaceae	Didymocarpus	2
Streptophyta	Streptophyta_Incertae_sedis	Lamiales	Gesneriaceae	Dorcoceras	4
Streptophyta	Streptophyta_Incertae_sedis	Lamiales	Gesneriaceae	Drymonia	12
Streptophyta	Streptophyta_Incertae_sedis	Lamiales	Gesneriaceae	Episcia	1
Streptophyta	Streptophyta_Incertae_sedis	Lamiales	Gesneriaceae	Epithema	1
Streptophyta	Streptophyta_Incertae_sedis	Lamiales	Gesneriaceae	Eucodonia	1
Streptophyta	Streptophyta_Incertae_sedis	Lamiales	Gesneriaceae	Gasteranthus	2
Streptophyta	Streptophyta_Incertae_sedis	Lamiales	Gesneriaceae	Hemiboea	4
Streptophyta	Streptophyta_Incertae_sedis	Lamiales	Gesneriaceae	Kaisupeea	2
Streptophyta	Streptophyta_Incertae_sedis	Lamiales	Gesneriaceae	Kohleria	3
Streptophyta	Streptophyta_Incertae_sedis	Lamiales	Gesneriaceae	Loxocarpus	7
Streptophyta	Streptophyta_Incertae_sedis	Lamiales	Gesneriaceae	Lysionotus	1
Streptophyta	Streptophyta_Incertae_sedis	Lamiales	Gesneriaceae	Middletonia	3
Streptophyta	Streptophyta_Incertae_sedis	Lamiales	Gesneriaceae	Monopyle	2
Streptophyta	Streptophyta_Incertae_sedis	Lamiales	Gesneriaceae	Moussonia	1
Streptophyta	Streptophyta_Incertae_sedis	Lamiales	Gesneriaceae	Napeanthus	2
Streptophyta	Streptophyta_Incertae_sedis	Lamiales	Gesneriaceae	Nautilocalyx	4
Streptophyta	Streptophyta_Incertae_sedis	Lamiales	Gesneriaceae	Neomortonia	1
Streptophyta	Streptophyta_Incertae_sedis	Lamiales	Gesneriaceae	Oreocharis	12
Streptophyta	Streptophyta_Incertae_sedis	Lamiales	Gesneriaceae	Ornithoboea	4
Streptophyta	Streptophyta_Incertae_sedis	Lamiales	Gesneriaceae	Paliavana	4
Streptophyta	Streptophyta_Incertae_sedis	Lamiales	Gesneriaceae	Paraboea	33
Streptophyta	Streptophyta_Incertae_sedis	Lamiales	Gesneriaceae	Pearcea	3
Streptophyta	Streptophyta_Incertae_sedis	Lamiales	Gesneriaceae	Petrocodon	5
Streptophyta	Streptophyta_Incertae_sedis	Lamiales	Gesneriaceae	Primulina	109
Streptophyta	Streptophyta_Incertae_sedis	Lamiales	Gesneriaceae	Rhabdothamnopsis	1
Streptophyta	Streptophyta_Incertae_sedis	Lamiales	Gesneriaceae	Rhynchoglossum	1
Streptophyta	Streptophyta_Incertae_sedis	Lamiales	Gesneriaceae	Rhynchotechum	2
Streptophyta	Streptophyta_Incertae_sedis	Lamiales	Gesneriaceae	Rufodorsia	2
Streptophyta	Streptophyta_Incertae_sedis	Lamiales	Gesneriaceae	Sinningia	67
Streptophyta	Streptophyta_Incertae_sedis	Lamiales	Gesneriaceae	Smithiantha	1
Streptophyta	Streptophyta_Incertae_sedis	Lamiales	Gesneriaceae	Somrania	3
Streptophyta	Streptophyta_Incertae_sedis	Lamiales	Gesneriaceae	Stauranthera	1
Streptophyta	Streptophyta_Incertae_sedis	Lamiales	Gesneriaceae	Streptocarpus	29
Streptophyta	Streptophyta_Incertae_sedis	Lamiales	Gesneriaceae	Vanhouttea	7
Streptophyta	Streptophyta_Incertae_sedis	Lamiales	Lamiaceae	Acanthomintha	2
Streptophyta	Streptophyta_Incertae_sedis	Lamiales	Lamiaceae	Ajuga	8
Streptophyta	Streptophyta_Incertae_sedis	Lamiales	Lamiaceae	Anisomeles	1
Streptophyta	Streptophyta_Incertae_sedis	Lamiales	Lamiaceae	Betonica	1
Streptophyta	Streptophyta_Incertae_sedis	Lamiales	Lamiaceae	Callicarpa	8
Streptophyta	Streptophyta_Incertae_sedis	Lamiales	Lamiaceae	Cantinoa	4
Streptophyta	Streptophyta_Incertae_sedis	Lamiales	Lamiaceae	Clerodendrum	3
Streptophyta	Streptophyta_Incertae_sedis	Lamiales	Lamiaceae	Clinopodium	2
Streptophyta	Streptophyta_Incertae_sedis	Lamiales	Lamiaceae	Cyanocephalus	3
Streptophyta	Streptophyta_Incertae_sedis	Lamiales	Lamiaceae	Dracocephalum	8
Streptophyta	Streptophyta_Incertae_sedis	Lamiales	Lamiaceae	Eplingiella	1
Streptophyta	Streptophyta_Incertae_sedis	Lamiales	Lamiaceae	Eriope	8
Streptophyta	Streptophyta_Incertae_sedis	Lamiales	Lamiaceae	Eriopidion	1
Streptophyta	Streptophyta_Incertae_sedis	Lamiales	Lamiaceae	Glechoma									5
Streptophyta	Streptophyta_Incertae_sedis	Lamiales	Lamiaceae	Gmelina	2
Streptophyta	Streptophyta_Incertae_sedis	Lamiales	Lamiaceae	Gymneia	3
Streptophyta	Streptophyta_Incertae_sedis	Lamiales	Lamiaceae	Hypenia	3
Streptophyta	Streptophyta_Incertae_sedis	Lamiales	Lamiaceae	Hyptidendron	7
Streptophyta	Streptophyta_Incertae_sedis	Lamiales	Lamiaceae	Hyptis	27
Streptophyta	Streptophyta_Incertae_sedis	Lamiales	Lamiaceae	Hyssopus	2
Streptophyta	Streptophyta_Incertae_sedis	Lamiales	Lamiaceae	Lamium	3
Streptophyta	Streptophyta_Incertae_sedis	Lamiales	Lamiaceae	Lavandula	1
Streptophyta	Streptophyta_Incertae_sedis	Lamiales	Lamiaceae	Leonurus	2
Streptophyta	Streptophyta_Incertae_sedis	Lamiales	Lamiaceae	Lycopus	1
Streptophyta	Streptophyta_Incertae_sedis	Lamiales	Lamiaceae	Marsypianthes	3
Streptophyta	Streptophyta_Incertae_sedis	Lamiales	Lamiaceae	Martianthus	2
Streptophyta	Streptophyta_Incertae_sedis	Lamiales	Lamiaceae	Meehania									6
Streptophyta	Streptophyta_Incertae_sedis	Lamiales	Lamiaceae	Melittis	1
Streptophyta	Streptophyta_Incertae_sedis	Lamiales	Lamiaceae	Mentha	5
Streptophyta	Streptophyta_Incertae_sedis	Lamiales	Lamiaceae	Mesosphaerum	2
Streptophyta	Streptophyta_Incertae_sedis	Lamiales	Lamiaceae	Mosla	1
Streptophyta	Streptophyta_Incertae_sedis	Lamiales	Lamiaceae	Nepeta	1
Streptophyta	Streptophyta_Incertae_sedis	Lamiales	Lamiaceae	Ocimum	2
Streptophyta	Streptophyta_Incertae_sedis	Lamiales	Lamiaceae	Oocephalus	5
Streptophyta	Streptophyta_Incertae_sedis	Lamiales	Lamiaceae	Origanum	1
Streptophyta	Streptophyta_Incertae_sedis	Lamiales	Lamiaceae	Paravitex	1
Streptophyta	Streptophyta_Incertae_sedis	Lamiales	Lamiaceae	Peltodon	3
Streptophyta	Streptophyta_Incertae_sedis	Lamiales	Lamiaceae	Perilla	3
Streptophyta	Streptophyta_Incertae_sedis	Lamiales	Lamiaceae	Phlomis	1
Streptophyta	Streptophyta_Incertae_sedis	Lamiales	Lamiaceae	Phlomoides	2
Streptophyta	Streptophyta_Incertae_sedis	Lamiales	Lamiaceae	Plectranthus	1
Streptophyta	Streptophyta_Incertae_sedis	Lamiales	Lamiaceae	Pogogyne	7
Streptophyta	Streptophyta_Incertae_sedis	Lamiales	Lamiaceae	Pogostemon	3
Streptophyta	Streptophyta_Incertae_sedis	Lamiales	Lamiaceae	Premna	1
Streptophyta	Streptophyta_Incertae_sedis	Lamiales	Lamiaceae	Prunella	1
Streptophyta	Streptophyta_Incertae_sedis	Lamiales	Lamiaceae	Salvia	24
Streptophyta	Streptophyta_Incertae_sedis	Lamiales	Lamiaceae	Scutellaria	4
Streptophyta	Streptophyta_Incertae_sedis	Lamiales	Lamiaceae	Sideritis	2
Streptophyta	Streptophyta_Incertae_sedis	Lamiales	Lamiaceae	Stachys	1
Streptophyta	Streptophyta_Incertae_sedis	Lamiales	Lamiaceae	Tectona	1
Streptophyta	Streptophyta_Incertae_sedis	Lamiales	Lamiaceae	Teucrium	3
Streptophyta	Streptophyta_Incertae_sedis	Lamiales	Lamiaceae	Thymus	4	1
Streptophyta	Streptophyta_Incertae_sedis	Lamiales	Lamiaceae	Vitex	8
Streptophyta	Streptophyta_Incertae_sedis	Lamiales	Lamiaceae	Ziziphora	1
Streptophyta	Streptophyta_Incertae_sedis	Lamiales	Lamiales_Incertae_sedis	Peltanthera	1
Streptophyta	Streptophyta_Incertae_sedis	Lamiales	Lentibulariaceae	Pinguicula		1
Streptophyta	Streptophyta_Incertae_sedis	Lamiales	Lentibulariaceae	Utricularia	6
Streptophyta	Streptophyta_Incertae_sedis	Lamiales	Oleaceae	Chionanthus	3	2
Streptophyta	Streptophyta_Incertae_sedis	Lamiales	Oleaceae	Fraxinus	1
Streptophyta	Streptophyta_Incertae_sedis	Lamiales	Oleaceae	Jasminum	3
Streptophyta	Streptophyta_Incertae_sedis	Lamiales	Oleaceae	Nyctanthes	1
Streptophyta	Streptophyta_Incertae_sedis	Lamiales	Oleaceae	Olea	2	1
Streptophyta	Streptophyta_Incertae_sedis	Lamiales	Orobanchaceae	Bartsia	1
Streptophyta	Streptophyta_Incertae_sedis	Lamiales	Orobanchaceae	Bellardia	1
Streptophyta	Streptophyta_Incertae_sedis	Lamiales	Orobanchaceae	Cistanche	1
Streptophyta	Streptophyta_Incertae_sedis	Lamiales	Orobanchaceae	Euphrasia	18
Streptophyta	Streptophyta_Incertae_sedis	Lamiales	Orobanchaceae	Lathraea	1
Streptophyta	Streptophyta_Incertae_sedis	Lamiales	Orobanchaceae	Melampyrum	2
Streptophyta	Streptophyta_Incertae_sedis	Lamiales	Orobanchaceae	Odontites	1
Streptophyta	Streptophyta_Incertae_sedis	Lamiales	Orobanchaceae	Orobanche	8
Streptophyta	Streptophyta_Incertae_sedis	Lamiales	Orobanchaceae	Pedicularis	4
Streptophyta	Streptophyta_Incertae_sedis	Lamiales	Orobanchaceae	Phelipanche	1
Streptophyta	Streptophyta_Incertae_sedis	Lamiales	Orobanchaceae	Rhinanthus	1
Streptophyta	Streptophyta_Incertae_sedis	Lamiales	Orobanchaceae	Siphonostegia	1
Streptophyta	Streptophyta_Incertae_sedis	Lamiales	Paulowniaceae	Paulownia	2
Streptophyta	Streptophyta_Incertae_sedis	Lamiales	Pedaliaceae	Harpagophytum	2
Streptophyta	Streptophyta_Incertae_sedis	Lamiales	Pedaliaceae	Sesamum	1
Streptophyta	Streptophyta_Incertae_sedis	Lamiales	Plantaginaceae	Adenosma	1
Streptophyta	Streptophyta_Incertae_sedis	Lamiales	Plantaginaceae	Albraunia	1
Streptophyta	Streptophyta_Incertae_sedis	Lamiales	Plantaginaceae	Antirrhinum	1
Streptophyta	Streptophyta_Incertae_sedis	Lamiales	Plantaginaceae	Chaenorhinum	9
Streptophyta	Streptophyta_Incertae_sedis	Lamiales	Plantaginaceae	Digitalis	17
Streptophyta	Streptophyta_Incertae_sedis	Lamiales	Plantaginaceae	Gadoria	1
Streptophyta	Streptophyta_Incertae_sedis	Lamiales	Plantaginaceae	Globularia	1
Streptophyta	Streptophyta_Incertae_sedis	Lamiales	Plantaginaceae	Glumicalyx	2
Streptophyta	Streptophyta_Incertae_sedis	Lamiales	Plantaginaceae	Gratiola	1
Streptophyta	Streptophyta_Incertae_sedis	Lamiales	Plantaginaceae	Isoplexis	4
Streptophyta	Streptophyta_Incertae_sedis	Lamiales	Plantaginaceae	Kickxia	18
Streptophyta	Streptophyta_Incertae_sedis	Lamiales	Plantaginaceae	Linaria	35				1
Streptophyta	Streptophyta_Incertae_sedis	Lamiales	Plantaginaceae	Littorella	2
Streptophyta	Streptophyta_Incertae_sedis	Lamiales	Plantaginaceae	Microrrhinum	1
Streptophyta	Streptophyta_Incertae_sedis	Lamiales	Plantaginaceae	Misopates	1
Streptophyta	Streptophyta_Incertae_sedis	Lamiales	Plantaginaceae	Nanorrhinum	1
Streptophyta	Streptophyta_Incertae_sedis	Lamiales	Plantaginaceae	Nuttallanthus	1
Streptophyta	Streptophyta_Incertae_sedis	Lamiales	Plantaginaceae	Plantago	24
Streptophyta	Streptophyta_Incertae_sedis	Lamiales	Plantaginaceae	Russelia	1
Streptophyta	Streptophyta_Incertae_sedis	Lamiales	Plantaginaceae	Sibthorpia	1
Streptophyta	Streptophyta_Incertae_sedis	Lamiales	Plantaginaceae	Veronica	10
Streptophyta	Streptophyta_Incertae_sedis	Lamiales	Scrophulariaceae	Barthlottia	1
Streptophyta	Streptophyta_Incertae_sedis	Lamiales	Scrophulariaceae	Buddleja	3
Streptophyta	Streptophyta_Incertae_sedis	Lamiales	Scrophulariaceae	Colpias	1
Streptophyta	Streptophyta_Incertae_sedis	Lamiales	Scrophulariaceae	Cromidon	1
Streptophyta	Streptophyta_Incertae_sedis	Lamiales	Scrophulariaceae	Diascia	1
Streptophyta	Streptophyta_Incertae_sedis	Lamiales	Scrophulariaceae	Diclis	1
Streptophyta	Streptophyta_Incertae_sedis	Lamiales	Scrophulariaceae	Hebenstretia	3
Streptophyta	Streptophyta_Incertae_sedis	Lamiales	Scrophulariaceae	Jamesbrittenia	1
Streptophyta	Streptophyta_Incertae_sedis	Lamiales	Scrophulariaceae	Limosella	3
Streptophyta	Streptophyta_Incertae_sedis	Lamiales	Scrophulariaceae	Lyperia	2
Streptophyta	Streptophyta_Incertae_sedis	Lamiales	Scrophulariaceae	Manulea	11
Streptophyta	Streptophyta_Incertae_sedis	Lamiales	Scrophulariaceae	Melanospermum	1
Streptophyta	Streptophyta_Incertae_sedis	Lamiales	Scrophulariaceae	Microdon	2
Streptophyta	Streptophyta_Incertae_sedis	Lamiales	Scrophulariaceae	Nemesia	1
Streptophyta	Streptophyta_Incertae_sedis	Lamiales	Scrophulariaceae	Oreosolen	1
Streptophyta	Streptophyta_Incertae_sedis	Lamiales	Scrophulariaceae	Phyllopodium	2
Streptophyta	Streptophyta_Incertae_sedis	Lamiales	Scrophulariaceae	Polycarena	1
Streptophyta	Streptophyta_Incertae_sedis	Lamiales	Scrophulariaceae	Pseudoselago	3
Streptophyta	Streptophyta_Incertae_sedis	Lamiales	Scrophulariaceae	Scrophularia	23	1
Streptophyta	Streptophyta_Incertae_sedis	Lamiales	Scrophulariaceae	Selago	17
Streptophyta	Streptophyta_Incertae_sedis	Lamiales	Scrophulariaceae	Sutera	8
Streptophyta	Streptophyta_Incertae_sedis	Lamiales	Scrophulariaceae	Tetraselago	2
Streptophyta	Streptophyta_Incertae_sedis	Lamiales	Scrophulariaceae	Trieenea	1
Streptophyta	Streptophyta_Incertae_sedis	Lamiales	Scrophulariaceae	Verbascum	9
Streptophyta	Streptophyta_Incertae_sedis	Lamiales	Scrophulariaceae	Zaluzianskya	5
Streptophyta	Streptophyta_Incertae_sedis	Lamiales	Stilbaceae	Anastrabe	1
Streptophyta	Streptophyta_Incertae_sedis	Lamiales	Stilbaceae	Charadrophila	1
Streptophyta	Streptophyta_Incertae_sedis	Lamiales	Stilbaceae	Halleria	2
Streptophyta	Streptophyta_Incertae_sedis	Lamiales	Stilbaceae	Nuxia	2
Streptophyta	Streptophyta_Incertae_sedis	Lamiales	Verbenaceae	Aloysia	1
Streptophyta	Streptophyta_Incertae_sedis	Lamiales	Verbenaceae	Phyla		1
Streptophyta	Streptophyta_Incertae_sedis	Lamiales	Verbenaceae	Verbena	1
Streptophyta	Streptophyta_Incertae_sedis	Laurales	Lauraceae	Actinodaphne		1
Streptophyta	Streptophyta_Incertae_sedis	Laurales	Lauraceae	Alseodaphnopsis	1
Streptophyta	Streptophyta_Incertae_sedis	Laurales	Lauraceae	Beilschmiedia	20
Streptophyta	Streptophyta_Incertae_sedis	Laurales	Lauraceae	Cinnamomum		12
Streptophyta	Streptophyta_Incertae_sedis	Laurales	Lauraceae	Cryptocarya	17
Streptophyta	Streptophyta_Incertae_sedis	Laurales	Lauraceae	Damburneya		3
Streptophyta	Streptophyta_Incertae_sedis	Laurales	Lauraceae	Endiandra	2
Streptophyta	Streptophyta_Incertae_sedis	Laurales	Lauraceae	Litsea		4	1
Streptophyta	Streptophyta_Incertae_sedis	Laurales	Lauraceae	Machilus		1
Streptophyta	Streptophyta_Incertae_sedis	Laurales	Lauraceae	Nectandra		22				1
Streptophyta	Streptophyta_Incertae_sedis	Laurales	Lauraceae	Neolitsea		4
Streptophyta	Streptophyta_Incertae_sedis	Laurales	Lauraceae	Ocotea		8
Streptophyta	Streptophyta_Incertae_sedis	Laurales	Lauraceae	Phoebe		2
Streptophyta	Streptophyta_Incertae_sedis	Laurales	Lauraceae	Pleurothyrium		2
Streptophyta	Streptophyta_Incertae_sedis	Laurales	Siparunaceae	Siparuna	1
Streptophyta	Streptophyta_Incertae_sedis	Magnoliales	Annonaceae	Alphonsea	2
Streptophyta	Streptophyta_Incertae_sedis	Magnoliales	Annonaceae	Annonaceae_Incertae_sedis	1
Streptophyta	Streptophyta_Incertae_sedis	Magnoliales	Annonaceae	Friesodielsia	2
Streptophyta	Streptophyta_Incertae_sedis	Magnoliales	Annonaceae	Goniothalamus	2
Streptophyta	Streptophyta_Incertae_sedis	Magnoliales	Annonaceae	Melodorum	1
Streptophyta	Streptophyta_Incertae_sedis	Magnoliales	Annonaceae	Miliusa	1
Streptophyta	Streptophyta_Incertae_sedis	Magnoliales	Annonaceae	Mitrephora	1
Streptophyta	Streptophyta_Incertae_sedis	Magnoliales	Annonaceae	Monanthotaxis	7
Streptophyta	Streptophyta_Incertae_sedis	Magnoliales	Annonaceae	Monoon	1
Streptophyta	Streptophyta_Incertae_sedis	Magnoliales	Annonaceae	Polyalthia	1
Streptophyta	Streptophyta_Incertae_sedis	Magnoliales	Annonaceae	Pseuduvaria	1
Streptophyta	Streptophyta_Incertae_sedis	Magnoliales	Annonaceae	Uvaria	8
Streptophyta	Streptophyta_Incertae_sedis	Magnoliales	Myristicaceae	Knema	1
Streptophyta	Streptophyta_Incertae_sedis	Malpighiales	Calophyllaceae	Calophyllum	2
Streptophyta	Streptophyta_Incertae_sedis	Malpighiales	Calophyllaceae	Kayea	1
Streptophyta	Streptophyta_Incertae_sedis	Malpighiales	Chrysobalanaceae	Acioa	1
Streptophyta	Streptophyta_Incertae_sedis	Malpighiales	Chrysobalanaceae	Atuna	1
Streptophyta	Streptophyta_Incertae_sedis	Malpighiales	Chrysobalanaceae	Bafodeya	1
Streptophyta	Streptophyta_Incertae_sedis	Malpighiales	Chrysobalanaceae	Chrysobalanus	1
Streptophyta	Streptophyta_Incertae_sedis	Malpighiales	Chrysobalanaceae	Couepia	3
Streptophyta	Streptophyta_Incertae_sedis	Malpighiales	Chrysobalanaceae	Dactyladenia	1
Streptophyta	Streptophyta_Incertae_sedis	Malpighiales	Chrysobalanaceae	Exellodendron	1
Streptophyta	Streptophyta_Incertae_sedis	Malpighiales	Chrysobalanaceae	Grangeria	1
Streptophyta	Streptophyta_Incertae_sedis	Malpighiales	Chrysobalanaceae	Hirtella	6
Streptophyta	Streptophyta_Incertae_sedis	Malpighiales	Chrysobalanaceae	Hunga	1
Streptophyta	Streptophyta_Incertae_sedis	Malpighiales	Chrysobalanaceae	Kostermanthus	1
Streptophyta	Streptophyta_Incertae_sedis	Malpighiales	Chrysobalanaceae	Licania	7
Streptophyta	Streptophyta_Incertae_sedis	Malpighiales	Chrysobalanaceae	Magnistipula	1
Streptophyta	Streptophyta_Incertae_sedis	Malpighiales	Chrysobalanaceae	Maranthes	1
Streptophyta	Streptophyta_Incertae_sedis	Malpighiales	Chrysobalanaceae	Neocarya	1
Streptophyta	Streptophyta_Incertae_sedis	Malpighiales	Chrysobalanaceae	Parinari	2
Streptophyta	Streptophyta_Incertae_sedis	Malpighiales	Clusiaceae	Clusia	29	4		1
Streptophyta	Streptophyta_Incertae_sedis	Malpighiales	Clusiaceae	Garcinia	8
Streptophyta	Streptophyta_Incertae_sedis	Malpighiales	Clusiaceae	Tovomita	2
Streptophyta	Streptophyta_Incertae_sedis	Malpighiales	Dichapetalaceae	Dichapetalum	1
Streptophyta	Streptophyta_Incertae_sedis	Malpighiales	Euphorbiaceae	Acidoton	1
Streptophyta	Streptophyta_Incertae_sedis	Malpighiales	Euphorbiaceae	Alchornea	1
Streptophyta	Streptophyta_Incertae_sedis	Malpighiales	Euphorbiaceae	Bernardia	3
Streptophyta	Streptophyta_Incertae_sedis	Malpighiales	Euphorbiaceae	Bia	2
Streptophyta	Streptophyta_Incertae_sedis	Malpighiales	Euphorbiaceae	Caryodendron	1
Streptophyta	Streptophyta_Incertae_sedis	Malpighiales	Euphorbiaceae	Chrozophora	1
Streptophyta	Streptophyta_Incertae_sedis	Malpighiales	Euphorbiaceae	Cleidion	1
Streptophyta	Streptophyta_Incertae_sedis	Malpighiales	Euphorbiaceae	Cnesmone	2
Streptophyta	Streptophyta_Incertae_sedis	Malpighiales	Euphorbiaceae	Dalechampia	3
Streptophyta	Streptophyta_Incertae_sedis	Malpighiales	Euphorbiaceae	Epiprinus	1
Streptophyta	Streptophyta_Incertae_sedis	Malpighiales	Euphorbiaceae	Euphorbia	29
Streptophyta	Streptophyta_Incertae_sedis	Malpighiales	Euphorbiaceae	Gitara	1
Streptophyta	Streptophyta_Incertae_sedis	Malpighiales	Euphorbiaceae	Haematostemon	1
Streptophyta	Streptophyta_Incertae_sedis	Malpighiales	Euphorbiaceae	Jatropha	3
Streptophyta	Streptophyta_Incertae_sedis	Malpighiales	Euphorbiaceae	Lasiococca	1
Streptophyta	Streptophyta_Incertae_sedis	Malpighiales	Euphorbiaceae	Mallotus	2
Streptophyta	Streptophyta_Incertae_sedis	Malpighiales	Euphorbiaceae	Mercurialis	7
Streptophyta	Streptophyta_Incertae_sedis	Malpighiales	Euphorbiaceae	Ostodes	1
Streptophyta	Streptophyta_Incertae_sedis	Malpighiales	Euphorbiaceae	Pachystylidium	1
Streptophyta	Streptophyta_Incertae_sedis	Malpighiales	Euphorbiaceae	Platygyna	1
Streptophyta	Streptophyta_Incertae_sedis	Malpighiales	Euphorbiaceae	Plukenetia	5
Streptophyta	Streptophyta_Incertae_sedis	Malpighiales	Euphorbiaceae	Ricinus	1
Streptophyta	Streptophyta_Incertae_sedis	Malpighiales	Euphorbiaceae	Romanoa	1
Streptophyta	Streptophyta_Incertae_sedis	Malpighiales	Euphorbiaceae	Sphaerostylis	1
Streptophyta	Streptophyta_Incertae_sedis	Malpighiales	Euphorbiaceae	Sumbaviopsis	1
Streptophyta	Streptophyta_Incertae_sedis	Malpighiales	Euphorbiaceae	Tragia	45	3
Streptophyta	Streptophyta_Incertae_sedis	Malpighiales	Euphorbiaceae	Tragiella	3
Streptophyta	Streptophyta_Incertae_sedis	Malpighiales	Euphorbiaceae	Triadica	1
Streptophyta	Streptophyta_Incertae_sedis	Malpighiales	Euphorbiaceae	Zuckertia	1
Streptophyta	Streptophyta_Incertae_sedis	Malpighiales	Euphroniaceae	Euphronia	1
Streptophyta	Streptophyta_Incertae_sedis	Malpighiales	Hypericaceae	Cratoxylum	1
Streptophyta	Streptophyta_Incertae_sedis	Malpighiales	Hypericaceae	Hypericum	1	10
Streptophyta	Streptophyta_Incertae_sedis	Malpighiales	Linaceae	Linum	4
Streptophyta	Streptophyta_Incertae_sedis	Malpighiales	Malpighiaceae	Banisteriopsis	1
Streptophyta	Streptophyta_Incertae_sedis	Malpighiales	Ochnaceae	Lacunaria	1
Streptophyta	Streptophyta_Incertae_sedis	Malpighiales	Passifloraceae	Passiflora	22
Streptophyta	Streptophyta_Incertae_sedis	Malpighiales	Passifloraceae	Turnera	1
Streptophyta	Streptophyta_Incertae_sedis	Malpighiales	Phyllanthaceae	Andrachne	2
Streptophyta	Streptophyta_Incertae_sedis	Malpighiales	Phyllanthaceae	Astrocasia	1
Streptophyta	Streptophyta_Incertae_sedis	Malpighiales	Phyllanthaceae	Bischofia	1
Streptophyta	Streptophyta_Incertae_sedis	Malpighiales	Phyllanthaceae	Breynia	2
Streptophyta	Streptophyta_Incertae_sedis	Malpighiales	Phyllanthaceae	Bridelia		17
Streptophyta	Streptophyta_Incertae_sedis	Malpighiales	Phyllanthaceae	Cleistanthus	4
Streptophyta	Streptophyta_Incertae_sedis	Malpighiales	Phyllanthaceae	Flueggea	2
Streptophyta	Streptophyta_Incertae_sedis	Malpighiales	Phyllanthaceae	Glochidion	4
Streptophyta	Streptophyta_Incertae_sedis	Malpighiales	Phyllanthaceae	Heterosavia				1
Streptophyta	Streptophyta_Incertae_sedis	Malpighiales	Phyllanthaceae	Heywoodia	1
Streptophyta	Streptophyta_Incertae_sedis	Malpighiales	Phyllanthaceae	Hieronyma	1
Streptophyta	Streptophyta_Incertae_sedis	Malpighiales	Phyllanthaceae	Lingelsheimia	1
Streptophyta	Streptophyta_Incertae_sedis	Malpighiales	Phyllanthaceae	Margaritaria	3
Streptophyta	Streptophyta_Incertae_sedis	Malpighiales	Phyllanthaceae	Meineckia					1
Streptophyta	Streptophyta_Incertae_sedis	Malpighiales	Phyllanthaceae	Phyllanthus	62								1
Streptophyta	Streptophyta_Incertae_sedis	Malpighiales	Phyllanthaceae	Pseudolachnostylis	1
Streptophyta	Streptophyta_Incertae_sedis	Malpighiales	Phyllanthaceae	Sauropus	3
Streptophyta	Streptophyta_Incertae_sedis	Malpighiales	Putranjivaceae	Drypetes	5
Streptophyta	Streptophyta_Incertae_sedis	Malpighiales	Rafflesiaceae	Rafflesia	11
Streptophyta	Streptophyta_Incertae_sedis	Malpighiales	Salicaceae	Homalium	1
Streptophyta	Streptophyta_Incertae_sedis	Malpighiales	Salicaceae	Itoa	1
Streptophyta	Streptophyta_Incertae_sedis	Malpighiales	Salicaceae	Salix	1
Streptophyta	Streptophyta_Incertae_sedis	Malpighiales	Salicaceae	Scolopia	1
Streptophyta	Streptophyta_Incertae_sedis	Malvales	Dipterocarpaceae	Parashorea	1
Streptophyta	Streptophyta_Incertae_sedis	Malvales	Dipterocarpaceae	Shorea	1
Streptophyta	Streptophyta_Incertae_sedis	Malvales	Malvaceae	Abelmoschus	1
Streptophyta	Streptophyta_Incertae_sedis	Malvales	Malvaceae	Abroma	1
Streptophyta	Streptophyta_Incertae_sedis	Malvales	Malvaceae	Abutilon	1
Streptophyta	Streptophyta_Incertae_sedis	Malvales	Malvaceae	Ceiba	1
Streptophyta	Streptophyta_Incertae_sedis	Malvales	Malvaceae	Colona	2
Streptophyta	Streptophyta_Incertae_sedis	Malvales	Malvaceae	Eriotheca	2
Streptophyta	Streptophyta_Incertae_sedis	Malvales	Malvaceae	Firmiana	1
Streptophyta	Streptophyta_Incertae_sedis	Malvales	Malvaceae	Hibiscus		3
Streptophyta	Streptophyta_Incertae_sedis	Malvales	Malvaceae	Kydia	5
Streptophyta	Streptophyta_Incertae_sedis	Malvales	Malvaceae	Microcos	2
Streptophyta	Streptophyta_Incertae_sedis	Malvales	Malvaceae	Pachira	2
Streptophyta	Streptophyta_Incertae_sedis	Malvales	Malvaceae	Pterygota	1
Streptophyta	Streptophyta_Incertae_sedis	Malvales	Malvaceae	Scaphium	1
Streptophyta	Streptophyta_Incertae_sedis	Malvales	Malvaceae	Sida	1
[truncated: 388 more rows]

## Sheet: species
								Number of Genbank records with the given end sequence
phylum	class	order	family	genus	species	predominant_end	predominant_freq	GT	AT	AC	GC	Other	TT	AG	AA	CT
					all (sum)			17369	3858	1109	557	60	23	37	9	5
Chlorophyta	Chlorodendrophyceae	Chlorodendrales	Chlorodendraceae	Chlorodendraceae_Incertae_sedis	uncultured_Tetraselmis	AC	1			1
Chlorophyta	Chlorodendrophyceae	Chlorodendrales	Chlorodendraceae	Scherffelia	Scherffelia_dubia	AC	1			1
Chlorophyta	Chlorodendrophyceae	Chlorodendrales	Chlorodendraceae	Tetraselmis	Tetraselmis_cordiformis	AC	1			1
Chlorophyta	Chlorodendrophyceae	Chlorodendrales	Chlorodendraceae	Tetraselmis	Tetraselmis_inconspicua	AC	1			1
Chlorophyta	Chlorodendrophyceae	Chlorodendrales	Chlorodendraceae	Tetraselmis	Tetraselmis_marina	AC	1			1
Chlorophyta	Chlorodendrophyceae	Chlorodendrales	Chlorodendraceae	Tetraselmis	Tetraselmis_sp._IOAC701S	AC	1			1
Chlorophyta	Chlorodendrophyceae	Chlorodendrales	Chlorodendraceae	Tetraselmis	Tetraselmis_sp._IOAC702S	AC	1			1
Chlorophyta	Chlorodendrophyceae	Chlorodendrales	Chlorodendraceae	Tetraselmis	Tetraselmis_striata	AC	1			1
Chlorophyta	Chlorodendrophyceae	Chlorodendrales	Chlorodendraceae	Tetraselmis	Tetraselmis_suecica	AC	1			1
Chlorophyta	Chlorophyceae	Chaetopeltidales	Chaetopeltidaceae	Chaetopeltis	Chaetopeltis_orbicularis	AC	1			1
Chlorophyta	Chlorophyceae	Chaetopeltidales	Chaetopeltidaceae	Dicranochaete	Dicranochaete_reniformis	AC	1			1
Chlorophyta	Chlorophyceae	Chaetopeltidales	Chaetopeltidaceae	Dicranochaete	Dicranochaete_sp._1_LC-2015	AC	1			1
Chlorophyta	Chlorophyceae	Chaetopeltidales	Chaetopeltidaceae	Koshicola	Koshicola_spirodelophila	AC	1			1
Chlorophyta	Chlorophyceae	Chaetophorales	Aphanochaetaceae	Aphanochaete	Aphanochaete_repens	AC	1			2
Chlorophyta	Chlorophyceae	Chaetophorales	Aphanochaetaceae	Aphanochaete	Aphanochaete_sp._CCAC_3490	AC	1			1
Chlorophyta	Chlorophyceae	Chaetophorales	Aphanochaetaceae	Caespitella	Caespitella_pascheri	AC	1			1
Chlorophyta	Chlorophyceae	Chaetophorales	Barrancaceae	Barranca	Barranca_multiflagellata	AC	1			2
Chlorophyta	Chlorophyceae	Chaetophorales	Chaetophoraceae	Chaetophora	Chaetophora_elegans	AC	1			1
Chlorophyta	Chlorophyceae	Chaetophorales	Chaetophoraceae	Chaetophora	Chaetophora_incrassata	AC	1			1
Chlorophyta	Chlorophyceae	Chaetophorales	Chaetophoraceae	Chaetophora	Chaetophora_lobata	AC	1			1
Chlorophyta	Chlorophyceae	Chaetophorales	Chaetophoraceae	Chaetophora	Chaetophora_sp._BEA_0173B	AC	1			1
Chlorophyta	Chlorophyceae	Chaetophorales	Chaetophoraceae	Chaetophora	Chaetophora_sp._CCALA_839	AC	1			1
Chlorophyta	Chlorophyceae	Chaetophorales	Chaetophoraceae	Draparnaldia	Draparnaldia_glomerata	AC	1			1
Chlorophyta	Chlorophyceae	Chaetophorales	Chaetophoraceae	Draparnaldia	Draparnaldia_plumosa	AC	1			1
Chlorophyta	Chlorophyceae	Chaetophorales	Chaetophorales_Incertae_sedis	Stigeoclonium	Stigeoclonium_elongatum	AC	1			1
Chlorophyta	Chlorophyceae	Chaetophorales	Chaetophorales_Incertae_sedis	Stigeoclonium	Stigeoclonium_helveticum	AC	1			1
Chlorophyta	Chlorophyceae	Chaetophorales	Chaetophorales_Incertae_sedis	Stigeoclonium	Stigeoclonium_nanum	AC	1			1
Chlorophyta	Chlorophyceae	Chaetophorales	Chaetophorales_Incertae_sedis	Stigeoclonium	Stigeoclonium_sp._CCAC_1901	AC	1			1
Chlorophyta	Chlorophyceae	Chaetophorales	Chaetophorales_Incertae_sedis	Stigeoclonium	Stigeoclonium_sp._CCAC_1904	AC	1			1
Chlorophyta	Chlorophyceae	Chaetophorales	Chaetophorales_Incertae_sedis	Stigeoclonium	Stigeoclonium_sp._CCAC_2384	AC	1			1
Chlorophyta	Chlorophyceae	Chaetophorales	Chaetophorales_Incertae_sedis	Stigeoclonium	Stigeoclonium_sp._CCAC_3493	AC	1			1
Chlorophyta	Chlorophyceae	Chaetophorales	Chaetophorales_Incertae_sedis	Stigeoclonium	Stigeoclonium_subsecundum	AC	1			2
Chlorophyta	Chlorophyceae	Chaetophorales	Chaetophorales_Incertae_sedis	Stigeoclonium	Stigeoclonium_tenue	AC	1			2
Chlorophyta	Chlorophyceae	Chaetophorales	Chaetophorales_Incertae_sedis	Stigeoclonium	Stigeoclonium_variabile	AC	1			1
Chlorophyta	Chlorophyceae	Chaetophorales	Schizomeridaceae	Schizomeris	Schizomeris_leibleinii	AC	1			1
Chlorophyta	Chlorophyceae	Chaetophorales	Uronemataceae	Uronema	Uronema_gigas	AC	1			1
Chlorophyta	Chlorophyceae	Chaetophorales	Uronemataceae	Uronema	Uronema_minutum	AC	1			1
Chlorophyta	Chlorophyceae	Chaetophorales	Uronemataceae	Uronema	Uronema_sp._CCAC_3491	AC	1			1
Chlorophyta	Chlorophyceae	Chaetophorales	Uronemataceae	Uronema	Uronema_sp._CCAP_334/1	AC	1			1
Chlorophyta	Chlorophyceae	Chaetophorales	Uronemataceae	Uronema	Uronema_sp._CCAP_335/1B	AC	1			1
Chlorophyta	Chlorophyceae	Chaetophorales	Uronemataceae	Uronema	Uronema_sp._CCAP_384/1	AT	1		1
Chlorophyta	Chlorophyceae	Chaetophorales	Uronemataceae	Uronema	Uronema_trentonense	AC	1			1
Chlorophyta	Chlorophyceae	Chlamydomonadales	Asteromonadaceae	Asteromonas	Asteromonas_gracilis	AC	1			1
Chlorophyta	Chlorophyceae	Chlamydomonadales	Chlamydomonadaceae	Chlamydomonadaceae_Incertae_sedis	Chlamydomonadaceae_sp._MCWWS12	AC	1			1
Chlorophyta	Chlorophyceae	Chlamydomonadales	Chlamydomonadaceae	Chlamydomonadaceae_Incertae_sedis	Chlamydomonadaceae_sp._MCWWS14	AC	1			1
Chlorophyta	Chlorophyceae	Chlamydomonadales	Chlamydomonadaceae	Chlamydomonadaceae_Incertae_sedis	Chlamydomonadaceae_sp._MCWWS16	AC	1			1
Chlorophyta	Chlorophyceae	Chlamydomonadales	Chlamydomonadaceae	Chlamydomonadaceae_Incertae_sedis	Chlamydomonadaceae_sp._MCWWS17	AC	1			1
Chlorophyta	Chlorophyceae	Chlamydomonadales	Chlamydomonadaceae	Chlamydomonadaceae_Incertae_sedis	Chlamydomonadaceae_sp._MCWWS18	AC	1			1
Chlorophyta	Chlorophyceae	Chlamydomonadales	Chlamydomonadaceae	Chlamydomonadaceae_Incertae_sedis	Chlamydomonadaceae_sp._MCWWS20	AC	1			1
Chlorophyta	Chlorophyceae	Chlamydomonadales	Chlamydomonadaceae	Chlamydomonadaceae_Incertae_sedis	Chlamydomonadaceae_sp._MCWWS21	AC	1			1
Chlorophyta	Chlorophyceae	Chlamydomonadales	Chlamydomonadaceae	Chlamydomonadaceae_Incertae_sedis	Chlamydomonadaceae_sp._MCWWS22	AC	1			1
Chlorophyta	Chlorophyceae	Chlamydomonadales	Chlamydomonadaceae	Chlamydomonadaceae_Incertae_sedis	Chlamydomonadaceae_sp._MCWWS25	AC	1			1
Chlorophyta	Chlorophyceae	Chlamydomonadales	Chlamydomonadaceae	Chlamydomonadaceae_Incertae_sedis	Chlamydomonadaceae_sp._MCWWS26	AC	1			1
Chlorophyta	Chlorophyceae	Chlamydomonadales	Chlamydomonadaceae	Chlamydomonadaceae_Incertae_sedis	Chlamydomonadaceae_sp._MCWWS29	AC	1			1
Chlorophyta	Chlorophyceae	Chlamydomonadales	Chlamydomonadaceae	Chlamydomonadaceae_Incertae_sedis	Chlamydomonadaceae_sp._MCWWS3	AC	1			1
Chlorophyta	Chlorophyceae	Chlamydomonadales	Chlamydomonadaceae	Chlamydomonadaceae_Incertae_sedis	Chlamydomonadaceae_sp._MCWWS30	AC	1			1
Chlorophyta	Chlorophyceae	Chlamydomonadales	Chlamydomonadaceae	Chlamydomonadaceae_Incertae_sedis	Chlamydomonadaceae_sp._MCWWS35	AC	1			1
Chlorophyta	Chlorophyceae	Chlamydomonadales	Chlamydomonadaceae	Chlamydomonadaceae_Incertae_sedis	Chlamydomonadaceae_sp._MCWWS36	AC	1			1
Chlorophyta	Chlorophyceae	Chlamydomonadales	Chlamydomonadaceae	Chlamydomonadaceae_Incertae_sedis	Chlamydomonadaceae_sp._MCWWS6	AC	1			1
Chlorophyta	Chlorophyceae	Chlamydomonadales	Chlamydomonadaceae	Chlamydomonadaceae_Incertae_sedis	Chlamydomonadaceae_sp._MCWWS8	AC	1			1
Chlorophyta	Chlorophyceae	Chlamydomonadales	Chlamydomonadaceae	Chlamydomonadaceae_Incertae_sedis	Chlamydomonadaceae_sp._MCWWS9	AC	1			1
Chlorophyta	Chlorophyceae	Chlamydomonadales	Chlamydomonadaceae	Chlamydomonas	Chlamydomonas_applanata	AC	1			6
Chlorophyta	Chlorophyceae	Chlamydomonadales	Chlamydomonadaceae	Chlamydomonas	Chlamydomonas_asymmetrica	AC	1			3
Chlorophyta	Chlorophyceae	Chlamydomonadales	Chlamydomonadaceae	Chlamydomonas	Chlamydomonas_baca	AC	1			1
Chlorophyta	Chlorophyceae	Chlamydomonadales	Chlamydomonadaceae	Chlamydomonas	Chlamydomonas_debaryana	AC	1			6
Chlorophyta	Chlorophyceae	Chlamydomonadales	Chlamydomonadaceae	Chlamydomonas	Chlamydomonas_dorsoventralis	AC	1			1
Chlorophyta	Chlorophyceae	Chlamydomonadales	Chlamydomonadaceae	Chlamydomonas	Chlamydomonas_globosa	AC	1			1
Chlorophyta	Chlorophyceae	Chlamydomonadales	Chlamydomonadaceae	Chlamydomonas	Chlamydomonas_inflexa	AC	1			1
Chlorophyta	Chlorophyceae	Chlamydomonadales	Chlamydomonadaceae	Chlamydomonas	Chlamydomonas_leiostraca	AC	1			1
Chlorophyta	Chlorophyceae	Chlamydomonadales	Chlamydomonadaceae	Chlamydomonas	Chlamydomonas_mexicana	AC	1			1
Chlorophyta	Chlorophyceae	Chlamydomonadales	Chlamydomonadaceae	Chlamydomonas	Chlamydomonas_moewusii	AC	1			1
Chlorophyta	Chlorophyceae	Chlamydomonadales	Chlamydomonadaceae	Chlamydomonas	Chlamydomonas_nivalis	AC	1			1
Chlorophyta	Chlorophyceae	Chlamydomonadales	Chlamydomonadaceae	Chlamydomonas	Chlamydomonas_primoveris	AC	1			1
Chlorophyta	Chlorophyceae	Chlamydomonadales	Chlamydomonadaceae	Chlamydomonas	Chlamydomonas_proboscigera	AC	1			2
Chlorophyta	Chlorophyceae	Chlamydomonadales	Chlamydomonadaceae	Chlamydomonas	Chlamydomonas_pulsatilla	AC	1			1
Chlorophyta	Chlorophyceae	Chlamydomonadales	Chlamydomonadaceae	Chlamydomonas	Chlamydomonas_rapa	AC	1			1
Chlorophyta	Chlorophyceae	Chlamydomonadales	Chlamydomonadaceae	Chlamydomonas	Chlamydomonas_reinhardtii	AC	1			3
Chlorophyta	Chlorophyceae	Chlamydomonadales	Chlamydomonadaceae	Chlamydomonas	Chlamydomonas_sp._CCAP_11/138	AC	1			1
Chlorophyta	Chlorophyceae	Chlamydomonadales	Chlamydomonadaceae	Chlamydomonas	Chlamydomonas_sp._CCAP_11/139	AC	1			1
Chlorophyta	Chlorophyceae	Chlamydomonadales	Chlamydomonadaceae	Chlamydomonas	Chlamydomonas_sp._CCAP_11/141	AC	1			1
Chlorophyta	Chlorophyceae	Chlamydomonadales	Chlamydomonadaceae	Chlamydomonas	Chlamydomonas_sp._CCAP_11/142	AC	1			1
Chlorophyta	Chlorophyceae	Chlamydomonadales	Chlamydomonadaceae	Chlamydomonas	Chlamydomonas_sp._CCAP_11/143	AC	1			1
Chlorophyta	Chlorophyceae	Chlamydomonadales	Chlamydomonadaceae	Chlamydomonas	Chlamydomonas_sp._CCAP_11/144	AC	1			1
Chlorophyta	Chlorophyceae	Chlamydomonadales	Chlamydomonadaceae	Chlamydomonas	Chlamydomonas_sp._CCAP_11/145	AC	1			1
Chlorophyta	Chlorophyceae	Chlamydomonadales	Chlamydomonadaceae	Chlamydomonas	Chlamydomonas_sp._CCAP_11/146	AC	1			1
Chlorophyta	Chlorophyceae	Chlamydomonadales	Chlamydomonadaceae	Chlamydomonas	Chlamydomonas_sp._CCAP_11/147	AC	1			1
Chlorophyta	Chlorophyceae	Chlamydomonadales	Chlamydomonadaceae	Chlamydomonas	Chlamydomonas_sp._CCAP_11/148	AC	1			1
Chlorophyta	Chlorophyceae	Chlamydomonadales	Chlamydomonadaceae	Chlamydomonas	Chlamydomonas_sp._CCAP_11/150	AC	1			1
Chlorophyta	Chlorophyceae	Chlamydomonadales	Chlamydomonadaceae	Chlamydomonas	Chlamydomonas_sp._CCAP_11/151	AC	1			1
Chlorophyta	Chlorophyceae	Chlamydomonadales	Chlamydomonadaceae	Chlamydomonas	Chlamydomonas_sp._CCAP_11/153	AC	1			1
Chlorophyta	Chlorophyceae	Chlamydomonadales	Chlamydomonadaceae	Chlamydomonas	Chlamydomonas_sp._CCAP_11/157	AC	1			1
Chlorophyta	Chlorophyceae	Chlamydomonadales	Chlamydomonadaceae	Chlamydomonas	Chlamydomonas_sp._CCAP_11/158	AC	1			1
Chlorophyta	Chlorophyceae	Chlamydomonadales	Chlamydomonadaceae	Chlamydomonas	Chlamydomonas_sp._CCAP_11/159	AC	1			1
Chlorophyta	Chlorophyceae	Chlamydomonadales	Chlamydomonadaceae	Chlamydomonas	Chlamydomonas_sp._CCAP_11/161	AC	1			1
Chlorophyta	Chlorophyceae	Chlamydomonadales	Chlamydomonadaceae	Chlamydomonas	Chlamydomonas_sp._CCAP_11/162	AC	1			1
Chlorophyta	Chlorophyceae	Chlamydomonadales	Chlamydomonadaceae	Chlamydomonas	Chlamydomonas_sp._CCAP_11/164	AC	1			1
Chlorophyta	Chlorophyceae	Chlamydomonadales	Chlamydomonadaceae	Chlamydomonas	Chlamydomonas_sp._CCAP_11/165	AC	1			1
Chlorophyta	Chlorophyceae	Chlamydomonadales	Chlamydomonadaceae	Chlamydomonas	Chlamydomonas_sp._CCAP_11/167	AC	1			1
Chlorophyta	Chlorophyceae	Chlamydomonadales	Chlamydomonadaceae	Chlamydomonas	Chlamydomonas_sp._CCAP_11/168	AC	1			1
Chlorophyta	Chlorophyceae	Chlamydomonadales	Chlamydomonadaceae	Chlamydomonas	Chlamydomonas_sp._CCAP_11/169	AC	1			1
Chlorophyta	Chlorophyceae	Chlamydomonadales	Chlamydomonadaceae	Chlamydomonas	Chlamydomonas_sp._ICE-L	AC	1			1
Chlorophyta	Chlorophyceae	Chlamydomonadales	Chlamydomonadaceae	Chlamydomonas	Chlamydomonas_sp._ICE-W	AC	1			1
Chlorophyta	Chlorophyceae	Chlamydomonadales	Chlamydomonadaceae	Chlamydomonas	Chlamydomonas_sp._KIOST-1	AC	1			1
Chlorophyta	Chlorophyceae	Chlamydomonadales	Chlamydomonadaceae	Chlamydomonas	Chlamydomonas_sp._KU101	AC	1			1
Chlorophyta	Chlorophyceae	Chlamydomonadales	Chlamydomonadaceae	Chlamydomonas	Chlamydomonas_sp._KU102	AC	1			1
Chlorophyta	Chlorophyceae	Chlamydomonadales	Chlamydomonadaceae	Chlamydomonas	Chlamydomonas_sp._KU103	AC	1			1
Chlorophyta	Chlorophyceae	Chlamydomonadales	Chlamydomonadaceae	Chlamydomonas	Chlamydomonas_sp._KU104	AC	1			1
Chlorophyta	Chlorophyceae	Chlamydomonadales	Chlamydomonadaceae	Chlamydomonas	Chlamydomonas_sp._KU105	AC	1			1
Chlorophyta	Chlorophyceae	Chlamydomonadales	Chlamydomonadaceae	Chlamydomonas	Chlamydomonas_sp._KU106	AC	1			1
Chlorophyta	Chlorophyceae	Chlamydomonadales	Chlamydomonadaceae	Chlamydomonas	Chlamydomonas_sp._KU107	AC	1			1
Chlorophyta	Chlorophyceae	Chlamydomonadales	Chlamydomonadaceae	Chlamydomonas	Chlamydomonas_sp._KU108	AC	1			1
Chlorophyta	Chlorophyceae	Chlamydomonadales	Chlamydomonadaceae	Chlamydomonas	Chlamydomonas_sp._MACC_388	AA	1								1
Chlorophyta	Chlorophyceae	Chlamydomonadales	Chlamydomonadaceae	Chlamydomonas	Chlamydomonas_sp._MACC_395	AC	1			1
Chlorophyta	Chlorophyceae	Chlamydomonadales	Chlamydomonadaceae	Chlamydomonas	Chlamydomonas_sp._TRC-1	AC	1			1
Chlorophyta	Chlorophyceae	Chlamydomonadales	Chlamydomonadaceae	Chlamydomonas	Chlamydomonas_sp._UWO_241	AC	1			1
Chlorophyta	Chlorophyceae	Chlamydomonadales	Chlamydomonadaceae	Chlamydomonas	Chlamydomonas_sphagnophila	AC	1			1
Chlorophyta	Chlorophyceae	Chlamydomonadales	Chlamydomonadaceae	Chlamydomonas	Chlamydomonas_splendida	AC	1			1
Chlorophyta	Chlorophyceae	Chlamydomonadales	Chlamydomonadaceae	Chloromonas	Chloromonas_alpina	AC	1			2
Chlorophyta	Chlorophyceae	Chlamydomonadales	Chlamydomonadaceae	Chloromonas	Chloromonas_brevispina	AC	1			1
Chlorophyta	Chlorophyceae	Chlamydomonadales	Chlamydomonadaceae	Chloromonas	Chloromonas_fonticola	AC	1			1
Chlorophyta	Chlorophyceae	Chlamydomonadales	Chlamydomonadaceae	Chloromonas	Chloromonas_insignis	AC	1			1
Chlorophyta	Chlorophyceae	Chlamydomonadales	Chlamydomonadaceae	Chloromonas	Chloromonas_nivalis	AC	1			1
Chlorophyta	Chlorophyceae	Chlamydomonadales	Chlamydomonadaceae	Chloromonas	Chloromonas_perforata	AC	1			1
Chlorophyta	Chlorophyceae	Chlamydomonadales	Chlamydomonadaceae	Chloromonas	Chloromonas_pichinchae	AC	1			2
Chlorophyta	Chlorophyceae	Chlamydomonadales	Chlamydomonadaceae	Chloromonas	Chloromonas_reticulata	AC	1			3
Chlorophyta	Chlorophyceae	Chlamydomonadales	Chlamydomonadaceae	Chloromonas	Chloromonas_rostafinskii	AC	1			1
Chlorophyta	Chlorophyceae	Chlamydomonadales	Chlamydomonadaceae	Chloromonas	Chloromonas_sp._CCCryo207-05	AC	1			1
Chlorophyta	Chlorophyceae	Chlamydomonadales	Chlamydomonadaceae	Chloromonas	Chloromonas_sp._CCCryo244-06	AC	1			1
Chlorophyta	Chlorophyceae	Chlamydomonadales	Chlamydomonadaceae	Chloromonas	Chloromonas_sp._CCCryo257-06	AC	1			1
Chlorophyta	Chlorophyceae	Chlamydomonadales	Chlamydomonadaceae	Chloromonas	Chloromonas_sp._CCCryo273-06	AC	1			1
Chlorophyta	Chlorophyceae	Chlamydomonadales	Chlamydomonadaceae	Chloromonas	Chloromonas_typhlos	AC	1			2
Chlorophyta	Chlorophyceae	Chlamydomonadales	Chlamydomonadaceae	Lobochlamys	Lobochlamys_segnis	AC	1			1
Chlorophyta	Chlorophyceae	Chlamydomonadales	Chlamydomonadales_Incertae_sedis	Borodinellopsis	Borodinellopsis_texensis	AC	1			1
Chlorophyta	Chlorophyceae	Chlamydomonadales	Chlamydomonadales_Incertae_sedis	Incertae_sedis	Chlamydomonadales_sp._AB-2012	AC	1			1
Chlorophyta	Chlorophyceae	Chlamydomonadales	Chlamydomonadales_Incertae_sedis	Ploeotila	Ploeotila_sp._CCCryo086-99	AC	1			1
Chlorophyta	Chlorophyceae	Chlamydomonadales	Chlorococcaceae	Chlorococcum	Chlorococcum_sp._CCAP_11/52	AC	1			1
Chlorophyta	Chlorophyceae	Chlamydomonadales	Chlorococcaceae	Chlorococcum	Chlorococcum_sp._MACC_693	AC	1			1
Chlorophyta	Chlorophyceae	Chlamydomonadales	Chlorococcaceae	Chlorococcum	Chlorococcum_sp._MACC_786	AC	1			1
Chlorophyta	Chlorophyceae	Chlamydomonadales	Chlorococcaceae	Chlorococcum	Chlorococcum_sp._MACC_807	AC	1			1
Chlorophyta	Chlorophyceae	Chlamydomonadales	Dunaliellaceae	Dunaliella	Dunaliella_primolecta	AC	1			1
Chlorophyta	Chlorophyceae	Chlamydomonadales	Dunaliellaceae	Dunaliella	Dunaliella_pseudosalina	AC	1			1
Chlorophyta	Chlorophyceae	Chlamydomonadales	Dunaliellaceae	Dunaliella	Dunaliella_salina	AC	1			5
Chlorophyta	Chlorophyceae	Chlamydomonadales	Dunaliellaceae	Dunaliella	Dunaliella_tertiolecta	AC	1			6
Chlorophyta	Chlorophyceae	Chlamydomonadales	Haematococcaceae	Haematococcus	Haematococcus_lacustris	AC	1			2
Chlorophyta	Chlorophyceae	Chlamydomonadales	Volvocaceae	Gonium	Gonium_pectorale	AC	1			1
Chlorophyta	Chlorophyceae	Chlamydomonadales	Volvocaceae	Yamagishiella	Yamagishiella_sp._1403259_D_Yamagishiella	AC	1			1
Chlorophyta	Chlorophyceae	Chlorophyceae_Incertae_sedis	Incertae_sedis	Carteria	Carteria_eugametos	AC	1			1
Chlorophyta	Chlorophyceae	Chlorophyceae_Incertae_sedis	Incertae_sedis	Carteria	Carteria_incisa	AC	1			1
Chlorophyta	Chlorophyceae	Chlorophyceae_Incertae_sedis	Incertae_sedis	Chlamydocapsa	Chlamydocapsa_ampla	AC	1			1
Chlorophyta	Chlorophyceae	Chlorophyceae_Incertae_sedis	Incertae_sedis	Desmococcus	Desmococcus_olivaceus	AC	1			1
Chlorophyta	Chlorophyceae	Chlorophyceae_Incertae_sedis	Incertae_sedis	Gloeocystis	Gloeocystis_polydermatica	AC	1			1
Chlorophyta	Chlorophyceae	Chlorophyceae_Incertae_sedis	Incertae_sedis	Incertae_sedis	uncultured_Chlorophyceae	AC	1			2
Chlorophyta	Chlorophyceae	Chlorophyceae_Incertae_sedis	Incertae_sedis	Pleurastrum	Pleurastrum_insigne	AC	1			2
Chlorophyta	Chlorophyceae	Chlorophyceae_Incertae_sedis	Incertae_sedis	Pleurastrum	Pleurastrum_sp._CCCryo_194-04	AC	1			1
Chlorophyta	Chlorophyceae	Chlorophyceae_Incertae_sedis	Incertae_sedis	Pleurastrum	Pleurastrum_sp._CCCryo_205-05	AC	1			1
Chlorophyta	Chlorophyceae	Chlorophyceae_Incertae_sedis	Incertae_sedis	Spermatozopsis	Spermatozopsis_exsultans	AC	1			1
Chlorophyta	Chlorophyceae	Chlorophyceae_Incertae_sedis	Incertae_sedis	Spermatozopsis	Spermatozopsis_similis	AC	1			1
Chlorophyta	Chlorophyceae	Oedogoniales	Oedogoniales_Incertae_sedis	Incertae_sedis	uncultured_Oedogoniales	AC	1			3
Chlorophyta	Chlorophyceae	Oedogoniales	Oedogoniales_Incertae_sedis	Oedogonium	Oedogonium_subplagiostomum	AC	1			1
Chlorophyta	Chlorophyceae	Sphaeropleales	Chromochloridaceae	Chromochloris	Chromochloris_zofingiensis	AC	1			1
Chlorophyta	Chlorophyceae	Sphaeropleales	Hydrodictyaceae	Hydrodictyon	Hydrodictyon_reticulatum	AC	1			1
Chlorophyta	Chlorophyceae	Sphaeropleales	Hydrodictyaceae	Parapediastrum	Parapediastrum_biradiatum	AC	1			1
Chlorophyta	Chlorophyceae	Sphaeropleales	Mychonastaceae	Mychonastes	Mychonastes_homosphaera	AC	1			1
Chlorophyta	Chlorophyceae	Sphaeropleales	Neochloridaceae	Neochloris	Neochloris_sp._AY2	AC	1			1
Chlorophyta	Chlorophyceae	Sphaeropleales	Neochloridaceae	Neochloris	Neochloris_sp._GM4e	AC	1			1
Chlorophyta	Chlorophyceae	Sphaeropleales	Scenedesmaceae	Asterarcys	Asterarcys_quadricellulare	AC	1			1
Chlorophyta	Chlorophyceae	Sphaeropleales	Scenedesmaceae	Asterarcys	Asterarcys_sp._MS3	AC	1			1
Chlorophyta	Chlorophyceae	Sphaeropleales	Scenedesmaceae	Desmodesmus	Desmodesmus_armatus	AC	1			1
Chlorophyta	Chlorophyceae	Sphaeropleales	Scenedesmaceae	Desmodesmus	Desmodesmus_brasiliensis	AC	1			3
Chlorophyta	Chlorophyceae	Sphaeropleales	Scenedesmaceae	Desmodesmus	Desmodesmus_intermedius	AC	1			4
Chlorophyta	Chlorophyceae	Sphaeropleales	Scenedesmaceae	Desmodesmus	Desmodesmus_pannonicus	AC	1			5
Chlorophyta	Chlorophyceae	Sphaeropleales	Scenedesmaceae	Desmodesmus	Desmodesmus_pirkollei	AC	1			1
Chlorophyta	Chlorophyceae	Sphaeropleales	Scenedesmaceae	Desmodesmus	Desmodesmus_sp._A8	AC	1			1
Chlorophyta	Chlorophyceae	Sphaeropleales	Scenedesmaceae	Desmodesmus	Desmodesmus_sp._FG	AC	1			1
Chlorophyta	Chlorophyceae	Sphaeropleales	Scenedesmaceae	Desmodesmus	Desmodesmus_sp._GM4a	AC	1			1
Chlorophyta	Chlorophyceae	Sphaeropleales	Scenedesmaceae	Desmodesmus	Desmodesmus_sp._GM4i	AC	1			1
Chlorophyta	Chlorophyceae	Sphaeropleales	Scenedesmaceae	Desmodesmus	Desmodesmus_sp._GM4j	AC	1			1
Chlorophyta	Chlorophyceae	Sphaeropleales	Scenedesmaceae	Desmodesmus	Desmodesmus_sp._M1-20	AC	1			1
Chlorophyta	Chlorophyceae	Sphaeropleales	Scenedesmaceae	Desmodesmus	Desmodesmus_sp._MACC_485	AC	1			1
Chlorophyta	Chlorophyceae	Sphaeropleales	Scenedesmaceae	Desmodesmus	Desmodesmus_sp._MACC_783	AC	1			1
Chlorophyta	Chlorophyceae	Sphaeropleales	Scenedesmaceae	Pectinodesmus	Pectinodesmus_sp._GB1j	AC	1			1
Chlorophyta	Chlorophyceae	Sphaeropleales	Scenedesmaceae	Scenedesmus	Scenedesmus_armatus	AC	1			1
Chlorophyta	Chlorophyceae	Sphaeropleales	Scenedesmaceae	Scenedesmus	Scenedesmus_quadricauda	AC	1			2
Chlorophyta	Chlorophyceae	Sphaeropleales	Scenedesmaceae	Scenedesmus	Scenedesmus_sp._SM15-1	AC	1			1
Chlorophyta	Chlorophyceae	Sphaeropleales	Scenedesmaceae	Scenedesmus	Scenedesmus_sp._SM8_2	AC	1			1
Chlorophyta	Chlorophyceae	Sphaeropleales	Scenedesmaceae	Tetradesmus	Tetradesmus_nygaardii	AC	1			1
Chlorophyta	Chlorophyceae	Sphaeropleales	Scenedesmaceae	Tetradesmus	Tetradesmus_obliquus	AC	1			5
Chlorophyta	Chlorophyceae	Sphaeropleales	Scenedesmaceae	Tetradesmus	Tetradesmus_reginae	AC	1			1
Chlorophyta	Chlorophyceae	Sphaeropleales	Scenedesmaceae	Tetranephris	Tetranephris_brasiliensis	AC	1			2
Chlorophyta	Chlorophyceae	Sphaeropleales	Selenastraceae	Ankistrodesmus	Ankistrodesmus_sp._LP	AC	1			1
Chlorophyta	Chlorophyceae	Sphaeropleales	Selenastraceae	Ankistrodesmus	Ankistrodesmus_sp._SP2-15	AC	1			1
Chlorophyta	Chlorophyceae	Sphaeropleales	Selenastraceae	Nephrochlamys	Nephrochlamys_subsolitaria	AC	1			1
Chlorophyta	Chlorophyceae	Sphaeropleales	Selenastraceae	Raphidocelis	Raphidocelis_sp._C1D	AC	1			1
Chlorophyta	Chlorophyceae	Sphaeropleales	Selenastraceae	Selenastraceae_Incertae_sedis	Selenastraceae_sp._GM4b	AC	1			1
Chlorophyta	Chlorophyceae	Tetrasporales	Tetrasporales_Incertae_sedis	Fritschiella	Fritschiella_tuberosa	AC	1			1
Chlorophyta	Chlorophyta_Incertae_sedis	Incertae_sedis	Incertae_sedis	Incertae_sedis	Chlorella-like_algae	AC	1			1
Chlorophyta	Chlorophyta_Incertae_sedis	Incertae_sedis	Incertae_sedis	Incertae_sedis	Chlorophyta_sp._SP2-3	AC	1			1
Chlorophyta	Chlorophyta_Incertae_sedis	Incertae_sedis	Incertae_sedis	Incertae_sedis	prasinophyte_sp._CCMP1205	AC	1			34
Chlorophyta	Chlorophyta_Incertae_sedis	Incertae_sedis	Incertae_sedis	Incertae_sedis	uncultured_prasinophyte	AT	1		3
Chlorophyta	Chlorophyta_Incertae_sedis	Incertae_sedis	Incertae_sedis	Picocystis	Picocystis_salinarum	AC	1			1
Chlorophyta	Chlorophyta_Incertae_sedis	Incertae_sedis	Pycnococcaceae	Pycnococcus	Pycnococcus_provasolii	AT	1		1
Chlorophyta	Chlorophyta_Incertae_sedis	Prasinococcales	Prasinococcales_Incertae_sedis	Prasinococcus	Prasinococcus_capsulatus	AT	1		1
Chlorophyta	Chlorophyta_Incertae_sedis	Prasinococcales	Prasinococcales_Incertae_sedis	Prasinoderma	Prasinoderma_coloniale	AT	1		1
Chlorophyta	Chlorophyta_Incertae_sedis	Pyramimonadales	Pyramimonadales_Incertae_sedis	Cymbomonas	Cymbomonas_tetramitiformis	AT	1		2
Chlorophyta	Chlorophyta_Incertae_sedis	Pyramimonadales	Pyramimonadales_Incertae_sedis	Pyramimonas	Pyramimonas_olivacea	AT	1		1
Chlorophyta	Chlorophyta_Incertae_sedis	Pyramimonadales	Pyramimonadales_Incertae_sedis	Pyramimonas	Pyramimonas_parkeae	AT	1		1
Chlorophyta	Chlorophyta_Incertae_sedis	Pyramimonadales	Pyramimonadales_Incertae_sedis	Pyramimonas	Pyramimonas_tetrarhynchus	AT	1		1
Chlorophyta	Mamiellophyceae	Dolichomastigales	Crustomastigaceae	Crustomastix	Crustomastix_stigmatica	AT	1		1
Chlorophyta	Mamiellophyceae	Dolichomastigales	Dolichomastigaceae	Dolichomastix	Dolichomastix_tenuilepis	AC	1			1
Chlorophyta	Mamiellophyceae	Mamiellales	Bathycoccaceae	Bathycoccus	Bathycoccus_prasinos	AT	1		36
Chlorophyta	Mamiellophyceae	Mamiellales	Bathycoccaceae	Ostreococcus	Ostreococcus_'lucimarinus'	AT	1		36
Chlorophyta	Mamiellophyceae	Mamiellales	Bathycoccaceae	Ostreococcus	Ostreococcus_sp._BCC5000	AT	1		1
Chlorophyta	Mamiellophyceae	Mamiellales	Bathycoccaceae	Ostreococcus	Ostreococcus_sp._BCC69000	AT	1		1
Chlorophyta	Mamiellophyceae	Mamiellales	Mamiellaceae	Mantoniella	Mantoniella_squamata	AT	1		6
Chlorophyta	Mamiellophyceae	Mamiellales	Mamiellaceae	Micromonas	Micromonas_commoda	AT	1		2
Chlorophyta	Mamiellophyceae	Mamiellales	Mamiellaceae	Micromonas	Micromonas_pusilla	AT	1		1
Chlorophyta	Mamiellophyceae	Mamiellales	Mamiellaceae	Micromonas	Micromonas_sp._HM10	AT	1		1
Chlorophyta	Mamiellophyceae	Mamiellales	Mamiellaceae	Micromonas	Micromonas_sp._HM3	AT	1		1
Chlorophyta	Mamiellophyceae	Mamiellales	Mamiellaceae	Micromonas	Micromonas_sp._HM6	AT	1		1
Chlorophyta	Mamiellophyceae	Mamiellales	Mamiellaceae	Micromonas	Micromonas_sp._HM7	AT	1		1
Chlorophyta	Mamiellophyceae	Mamiellales	Mamiellaceae	Micromonas	Micromonas_sp._KM12	AT	1		1
Chlorophyta	Mamiellophyceae	Mamiellales	Mamiellaceae	Micromonas	Micromonas_sp._KM4	AT	1		1
Chlorophyta	Mamiellophyceae	Mamiellales	Mamiellaceae	Micromonas	Micromonas_sp._KM5	AT	1		1
Chlorophyta	Mamiellophyceae	Mamiellales	Mamiellaceae	Micromonas	Micromonas_sp._RCC300	AT	1		2
Chlorophyta	Mamiellophyceae	Mamiellales	Mamiellaceae	Micromonas	Micromonas_sp._RCC301	AT	1		1
Chlorophyta	Mamiellophyceae	Mamiellales	Mamiellaceae	Micromonas	Micromonas_sp._RCC302	AT	1		1
Chlorophyta	Mamiellophyceae	Mamiellales	Mamiellaceae	Micromonas	Micromonas_sp._RCC303	AT	1		1
Chlorophyta	Mamiellophyceae	Mamiellales	Mamiellaceae	Micromonas	Micromonas_sp._RCC304	AT	1		2
Chlorophyta	Mamiellophyceae	Mamiellales	Mamiellaceae	Micromonas	Micromonas_sp._RCC305	AT	1		1
Chlorophyta	Mamiellophyceae	Mamiellales	Mamiellaceae	Micromonas	Micromonas_sp._RCC306	AT	1		1
Chlorophyta	Mamiellophyceae	Mamiellales	Mamiellales_Incertae_sedis	Incertae_sedis	uncultured_Bathycoccaceae	AT	1		2
Chlorophyta	Mamiellophyceae	Mamiellales	Mamiellales_Incertae_sedis	Incertae_sedis	uncultured_Mamiellales	AT	1		21
Chlorophyta	Mamiellophyceae	Mamiellales	Mamiellales_Incertae_sedis	Incertae_sedis	uncultured_Micromonas	AT	1		9
Chlorophyta	Mamiellophyceae	Mamiellales	Mamiellales_Incertae_sedis	Incertae_sedis	uncultured_Ostreococcus	AT	1		5
Chlorophyta	Mamiellophyceae	Monomastigales	Monomastigaceae	Monomastix	Monomastix_sp._M0722	AT	1		1
Chlorophyta	Nephroselmidophyceae	Nephroselmidophyceae_Incertae_sedis	Incertae_sedis	Nephroselmis	Nephroselmis_astigmatica	AT	1		1
Chlorophyta	Nephroselmidophyceae	Nephroselmidophyceae_Incertae_sedis	Incertae_sedis	Nephroselmis	Nephroselmis_olivacea	AT	1		1
Chlorophyta	Nephroselmidophyceae	Nephroselmidophyceae_Incertae_sedis	Incertae_sedis	Nephroselmis	Nephroselmis_pyriformis	AT	1		1
Chlorophyta	Nephroselmidophyceae	Nephroselmidophyceae_Incertae_sedis	Incertae_sedis	Nephroselmis	Nephroselmis_rotunda	AT	0.5		1				1
Chlorophyta	Nephroselmidophyceae	Nephroselmidophyceae_Incertae_sedis	Incertae_sedis	Nephroselmis	Nephroselmis_viridis	AT	1		1
Chlorophyta	Pedinophyceae	Marsupiomonadales	Marsupiomonadaceae	Marsupiomonas	Marsupiomonas_pelliculata	AC	1			1
Chlorophyta	Pedinophyceae	Pedinomonadales	Pedinomonadaceae	Pedinomonas	Pedinomonas_minor	AC	1			1
Chlorophyta	Pedinophyceae	Pedinomonadales	Pedinomonadaceae	Pedinomonas	Pedinomonas_sp._M2079/1	AC	1			1
Chlorophyta	Pedinophyceae	Pedinomonadales	Pedinomonadaceae	Pedinomonas	Pedinomonas_sp._UTEX_'LB_1027'	AC	1			1
Chlorophyta	Pedinophyceae	Pedinomonadales	Pedinomonadaceae	Pedinomonas	Pedinomonas_tuberculata	AC	1			1
Chlorophyta	Trebouxiophyceae	Chlorellales	Chlorellaceae	Auxenochlorella	Auxenochlorella_pyrenoidosa	AC	0.941176			16						1
Chlorophyta	Trebouxiophyceae	Chlorellales	Chlorellaceae	Chlorella	Chlorella_parva	AC	1			1
Chlorophyta	Trebouxiophyceae	Chlorellales	Chlorellaceae	Chlorella	Chlorella_sorokiniana	AC	1			11
Chlorophyta	Trebouxiophyceae	Chlorellales	Chlorellaceae	Chlorella	Chlorella_sp.	AC	1			1
Chlorophyta	Trebouxiophyceae	Chlorellales	Chlorellaceae	Chlorella	Chlorella_sp._'South_China_Sea'	AC	1			1
Chlorophyta	Trebouxiophyceae	Chlorellales	Chlorellaceae	Chlorella	Chlorella_sp._FI07	AC	1			1
Chlorophyta	Trebouxiophyceae	Chlorellales	Chlorellaceae	Chlorella	Chlorella_sp._FI20	AC	1			1
Chlorophyta	Trebouxiophyceae	Chlorellales	Chlorellaceae	Chlorella	Chlorella_sp._GTD8A1	AC	1			1
Chlorophyta	Trebouxiophyceae	Chlorellales	Chlorellaceae	Chlorella	Chlorella_sp._NUA-2014-2	AC	1			2
Chlorophyta	Trebouxiophyceae	Chlorellales	Chlorellaceae	Chlorella	Chlorella_sp._NUA-2014-3	AC	1			15
Chlorophyta	Trebouxiophyceae	Chlorellales	Chlorellaceae	Chlorella	Chlorella_variabilis	AC	1			2
Chlorophyta	Trebouxiophyceae	Chlorellales	Chlorellaceae	Chlorella	Chlorella_vulgaris	AC	1			6
Chlorophyta	Trebouxiophyceae	Chlorellales	Chlorellaceae	Chlorellaceae_Incertae_sedis	Chlorellaceae_sp._140319_Didinium-alga_P	AC	1			1
Chlorophyta	Trebouxiophyceae	Chlorellales	Chlorellaceae	Chlorellaceae_Incertae_sedis	Chlorellaceae_sp._MCWWS1	AC	1			1
Chlorophyta	Trebouxiophyceae	Chlorellales	Chlorellaceae	Chlorellaceae_Incertae_sedis	Chlorellaceae_sp._MCWWS2	AC	1			1
Chlorophyta	Trebouxiophyceae	Chlorellales	Chlorellaceae	Chlorellaceae_Incertae_sedis	Chlorellaceae_sp._MCWWS24	AC	1			1
Chlorophyta	Trebouxiophyceae	Chlorellales	Chlorellaceae	Chlorellaceae_Incertae_sedis	Chlorellaceae_sp._MCWWS27	AC	1			1
Chlorophyta	Trebouxiophyceae	Chlorellales	Chlorellaceae	Chlorellaceae_Incertae_sedis	Chlorellaceae_sp._MCWWS28	AC	1			1
Chlorophyta	Trebouxiophyceae	Chlorellales	Chlorellaceae	Chlorellaceae_Incertae_sedis	Chlorellaceae_sp._MCWWS31	AC	1			1
Chlorophyta	Trebouxiophyceae	Chlorellales	Chlorellaceae	Chlorellaceae_Incertae_sedis	Chlorellaceae_sp._MCWWS32	AC	1			1
Chlorophyta	Trebouxiophyceae	Chlorellales	Chlorellaceae	Chlorellaceae_Incertae_sedis	Chlorellaceae_sp._MCWWS4	AC	1			1
Chlorophyta	Trebouxiophyceae	Chlorellales	Chlorellaceae	Chlorellaceae_Incertae_sedis	Chlorellaceae_sp._MCWWW6	AC	1			1
Chlorophyta	Trebouxiophyceae	Chlorellales	Chlorellaceae	Chlorellaceae_Incertae_sedis	Chlorellaceae_sp._MCWWW7	AC	1			1
Chlorophyta	Trebouxiophyceae	Chlorellales	Chlorellaceae	Chlorellaceae_Incertae_sedis	Chlorellaceae_sp._MCWWW8	AC	1			1
Chlorophyta	Trebouxiophyceae	Chlorellales	Chlorellaceae	Chlorellaceae_Incertae_sedis	Chlorellaceae_sp._MCWWW9	AC	1			1
Chlorophyta	Trebouxiophyceae	Chlorellales	Chlorellaceae	Chloroidium	Chloroidium_angustoellipsoideum	AC	1			1
Chlorophyta	Trebouxiophyceae	Chlorellales	Chlorellaceae	Chloroidium	Chloroidium_saccharophilum	AC	1			9
Chlorophyta	Trebouxiophyceae	Chlorellales	Chlorellaceae	Compactochlorella	Compactochlorella_dohrmannii	AC	1			1
Chlorophyta	Trebouxiophyceae	Chlorellales	Chlorellaceae	Kalenjinia	Kalenjinia_gelatinosa	CT	1									1
Chlorophyta	Trebouxiophyceae	Chlorellales	Chlorellaceae	Lobosphaera	Lobosphaera_sp._K-1	AC	1			1
Chlorophyta	Trebouxiophyceae	Chlorellales	Chlorellaceae	Marvania	Marvania_geminata	AC	1			2
Chlorophyta	Trebouxiophyceae	Chlorellales	Chlorellaceae	Masaia	Masaia_oloidia	AA	1								1
Chlorophyta	Trebouxiophyceae	Chlorellales	Chlorellaceae	Micractinium	Micractinium_pusillum	AC	1			1
Chlorophyta	Trebouxiophyceae	Chlorellales	Chlorellaceae	Micractinium	Micractinium_reisseri	AC	1			3
Chlorophyta	Trebouxiophyceae	Chlorellales	Chlorellaceae	Micractinium	Micractinium_sp._MCWWW10	AC	1			1
Chlorophyta	Trebouxiophyceae	Chlorellales	Chlorellaceae	Micractinium	Micractinium_sp._MCWWW11	AC	1			1
Chlorophyta	Trebouxiophyceae	Chlorellales	Chlorellaceae	Micractinium	Micractinium_sp._MCWWW12	AC	1			1
Chlorophyta	Trebouxiophyceae	Chlorellales	Chlorellaceae	Micractinium	Micractinium_sp._MCWWW15	AC	1			1
Chlorophyta	Trebouxiophyceae	Chlorellales	Chlorellaceae	Micractinium	Micractinium_sp._MCWWW16	AC	1			1
Chlorophyta	Trebouxiophyceae	Chlorellales	Chlorellaceae	Micractinium	Micractinium_sp._MCWWW18	AC	1			1
Chlorophyta	Trebouxiophyceae	Chlorellales	Chlorellaceae	Micractinium	Micractinium_sp._MCWWW19	AC	1			1
Chlorophyta	Trebouxiophyceae	Chlorellales	Chlorellaceae	Micractinium	Micractinium_sp._MCWWW3	AC	1			1
Chlorophyta	Trebouxiophyceae	Chlorellales	Chlorellaceae	Micractinium	Micractinium_sp._MCWWW4	AC	1			1
Chlorophyta	Trebouxiophyceae	Chlorellales	Chlorellaceae	Micractinium	Micractinium_sp._MCWWW5	AC	1			1
Chlorophyta	Trebouxiophyceae	Chlorellales	Chlorellaceae	Prototheca	Prototheca_blaschkeae	AC	1			1
Chlorophyta	Trebouxiophyceae	Chlorellales	Chlorellaceae	Prototheca	Prototheca_ulmea	AC	1			2
Chlorophyta	Trebouxiophyceae	Chlorellales	Chlorellaceae	Prototheca	Prototheca_wickerhamii	AC	1			2
Chlorophyta	Trebouxiophyceae	Chlorellales	Chlorellaceae	Prototheca	Prototheca_zopfii	AC	1			2
Chlorophyta	Trebouxiophyceae	Chlorellales	Chlorellaceae	Pseudochlorella	Pseudochlorella_pringsheimii	AC	1			3
Chlorophyta	Trebouxiophyceae	Chlorellales	Chlorellaceae	Pseudochlorella	Pseudochlorella_signiensis	AC	1			3
Chlorophyta	Trebouxiophyceae	Chlorellales	Chlorellales_Incertae_sedis	Parachlorella	Parachlorella_kessleri	AC	1			2
Chlorophyta	Trebouxiophyceae	Chlorellales	Chlorellales_Incertae_sedis	Parachlorella	Parachlorella_sp._CCAP_206/1	AC	1			1
Chlorophyta	Trebouxiophyceae	Chlorellales	Eremosphaeraceae	Eremosphaera	Eremosphaera_viridis	AC	1			1
Chlorophyta	Trebouxiophyceae	Chlorellales	Oocystaceae	Coenochloris	Coenochloris_signiensis	AC	1			2
Chlorophyta	Trebouxiophyceae	Chlorellales	Oocystaceae	Coenochloris	Coenochloris_sp._CCCryo137-01	AC	1			1
Chlorophyta	Trebouxiophyceae	Chlorellales	Oocystaceae	Coenochloris	Coenochloris_sp._CCCryo138-01	AC	1			1
Chlorophyta	Trebouxiophyceae	Chlorellales	Oocystaceae	Coenochloris	Coenochloris_sp._CCCryo142-01	AC	1			1
Chlorophyta	Trebouxiophyceae	Chlorellales	Oocystaceae	Coenochloris	Coenochloris_sp._CCCryo145-01	AC	1			1
Chlorophyta	Trebouxiophyceae	Chlorellales	Oocystaceae	Coenochloris	Coenochloris_sp._CCCryo147-01	AC	1			1
Chlorophyta	Trebouxiophyceae	Chlorellales	Oocystaceae	Coenochloris	Coenochloris_sp._CCCryo148-01	AC	1			1
Chlorophyta	Trebouxiophyceae	Microthamniales	Microthamniales_Incertae_sedis	Asterochloris	Asterochloris_irregularis	AC	1			2
Chlorophyta	Trebouxiophyceae	Microthamniales	Microthamniales_Incertae_sedis	Asterochloris	Asterochloris_sp._DrostorpA2	AC	1			1
Chlorophyta	Trebouxiophyceae	Microthamniales	Microthamniales_Incertae_sedis	Asterochloris	Asterochloris_sp._DrostorpA3	AC	1			1
Chlorophyta	Trebouxiophyceae	Microthamniales	Microthamniales_Incertae_sedis	Asterochloris	Asterochloris_sp._DrostorpD4	AC	1			1
Chlorophyta	Trebouxiophyceae	Microthamniales	Microthamniales_Incertae_sedis	Asterochloris	Asterochloris_sp._DrostorpD5	AC	1			1
Chlorophyta	Trebouxiophyceae	Microthamniales	Microthamniales_Incertae_sedis	Asterochloris	Asterochloris_sp._DrostorpD6	AC	1			1
Chlorophyta	Trebouxiophyceae	Microthamniales	Microthamniales_Incertae_sedis	Asterochloris	Asterochloris_sp._GossenheimA1	AC	1			1
Chlorophyta	Trebouxiophyceae	Microthamniales	Microthamniales_Incertae_sedis	Asterochloris	Asterochloris_sp._GossenheimA2	AC	1			1
Chlorophyta	Trebouxiophyceae	Microthamniales	Microthamniales_Incertae_sedis	Asterochloris	Asterochloris_sp._GyngeA10	AC	1			1
Chlorophyta	Trebouxiophyceae	Microthamniales	Microthamniales_Incertae_sedis	Asterochloris	Asterochloris_sp._GyngeA12	AC	1			1
Chlorophyta	Trebouxiophyceae	Microthamniales	Microthamniales_Incertae_sedis	Asterochloris	Asterochloris_sp._MACB_90440	AC	1			1
Chlorophyta	Trebouxiophyceae	Microthamniales	Microthamniales_Incertae_sedis	Asterochloris	Asterochloris_sp._MACB_90499	AC	1			1
Chlorophyta	Trebouxiophyceae	Microthamniales	Microthamniales_Incertae_sedis	Asterochloris	Asterochloris_sp._MACB_90503	AC	1			1
Chlorophyta	Trebouxiophyceae	Microthamniales	Microthamniales_Incertae_sedis	Asterochloris	Asterochloris_sp._MACB_90533	AC	1			1
Chlorophyta	Trebouxiophyceae	Microthamniales	Microthamniales_Incertae_sedis	Asterochloris	Asterochloris_sp._MACB_90565	AC	1			3
Chlorophyta	Trebouxiophyceae	Microthamniales	Microthamniales_Incertae_sedis	Asterochloris	Asterochloris_sp._MACB_90574	AC	1			1
Chlorophyta	Trebouxiophyceae	Microthamniales	Microthamniales_Incertae_sedis	Asterochloris	Asterochloris_sp._MACB_90622	AC	1			1
Chlorophyta	Trebouxiophyceae	Microthamniales	Microthamniales_Incertae_sedis	Asterochloris	Asterochloris_sp._MACB_91639	AC	1			1
Chlorophyta	Trebouxiophyceae	Microthamniales	Microthamniales_Incertae_sedis	Asterochloris	Asterochloris_sp._MACB_91687	AC	1			1
Chlorophyta	Trebouxiophyceae	Microthamniales	Microthamniales_Incertae_sedis	Asterochloris	Asterochloris_sp._MACB_95599	AC	1			1
Chlorophyta	Trebouxiophyceae	Microthamniales	Microthamniales_Incertae_sedis	Asterochloris	Asterochloris_sp._MACB_95602	AC	1			1
Chlorophyta	Trebouxiophyceae	Microthamniales	Microthamniales_Incertae_sedis	Dictyochloropsis	Dictyochloropsis_sp._LMCC-AM02	AC	1			1
Chlorophyta	Trebouxiophyceae	Microthamniales	Microthamniales_Incertae_sedis	Dictyochloropsis	Dictyochloropsis_splendida	AC	1			2
Chlorophyta	Trebouxiophyceae	Microthamniales	Microthamniales_Incertae_sedis	Elliptochloris	Elliptochloris_marina	AC	0.857143		1	6
Chlorophyta	Trebouxiophyceae	Microthamniales	Microthamniales_Incertae_sedis	Stichococcus	Stichococcus_bacillaris	AC	1			2
Chlorophyta	Trebouxiophyceae	Microthamniales	Microthamniales_Incertae_sedis	Stichococcus	Stichococcus_chloranthus	AC	1			1
Chlorophyta	Trebouxiophyceae	Microthamniales	Microthamniales_Incertae_sedis	Stichococcus	Stichococcus_sp._IOAC700S	AC	1			1
Chlorophyta	Trebouxiophyceae	Microthamniales	Microthamniales_Incertae_sedis	Stichococcus	Stichococcus_sp._KP09AW1004	AC	1			1
Chlorophyta	Trebouxiophyceae	Microthamniales	Microthamniales_Incertae_sedis	Symbiochloris	Symbiochloris_reticulata	AC	1			1
Chlorophyta	Trebouxiophyceae	Microthamniales	Microthamniales_Incertae_sedis	Symbiochloris	Symbiochloris_symbiontica	AC	1			3
Chlorophyta	Trebouxiophyceae	Microthamniales	Microthamniales_Incertae_sedis	Symbiochloris	Symbiochloris_tropica	AC	1			1
Chlorophyta	Trebouxiophyceae	Microthamniales	Microthamniales_Incertae_sedis	Trebouxia	Trebouxia_angustilobata	AC	1			1
Chlorophyta	Trebouxiophyceae	Microthamniales	Microthamniales_Incertae_sedis	Trebouxia	Trebouxia_arboricola	AC	1			1
Chlorophyta	Trebouxiophyceae	Microthamniales	Microthamniales_Incertae_sedis	Trebouxia	Trebouxia_decolorans	AC	1			10
Chlorophyta	Trebouxiophyceae	Microthamniales	Microthamniales_Incertae_sedis	Trebouxia	Trebouxia_gelatinosa	AC	1			1
Chlorophyta	Trebouxiophyceae	Microthamniales	Microthamniales_Incertae_sedis	Trebouxia	Trebouxia_impressa	AC	0.941176			16					1
Chlorophyta	Trebouxiophyceae	Microthamniales	Microthamniales_Incertae_sedis	Trebouxia	Trebouxia_simplex	AC	1			3
Chlorophyta	Trebouxiophyceae	Microthamniales	Microthamniales_Incertae_sedis	Trebouxia	Trebouxia_sp._'simplex_clade_1'	AC	1			23
Chlorophyta	Trebouxiophyceae	Microthamniales	Microthamniales_Incertae_sedis	Trebouxia	Trebouxia_sp._'vagua'	AC	1			6
Chlorophyta	Trebouxiophyceae	Microthamniales	Microthamniales_Incertae_sedis	Trebouxia	Trebouxia_sp._16_GS-2016	AC	1			2
Chlorophyta	Trebouxiophyceae	Microthamniales	Microthamniales_Incertae_sedis	Trebouxia	Trebouxia_sp._18_GS-2016	AC	1			2
Chlorophyta	Trebouxiophyceae	Microthamniales	Microthamniales_Incertae_sedis	Trebouxia	Trebouxia_sp._2_GS-2016	AC	1			1
Chlorophyta	Trebouxiophyceae	Microthamniales	Microthamniales_Incertae_sedis	Trebouxia	Trebouxia_sp._6_GS-2016	AC	1			6
Chlorophyta	Trebouxiophyceae	Microthamniales	Microthamniales_Incertae_sedis	Trebouxia	Trebouxia_sp._7_GS-2016	AA	0.5			1					1
Chlorophyta	Trebouxiophyceae	Microthamniales	Microthamniales_Incertae_sedis	Trebouxia	Trebouxia_sp._8_GS-2016	AC	1			6
Chlorophyta	Trebouxiophyceae	Microthamniales	Microthamniales_Incertae_sedis	Trebouxia	Trebouxia_sp._BGK-2010	AC	1			7
Chlorophyta	Trebouxiophyceae	Microthamniales	Microthamniales_Incertae_sedis	Trebouxia	Trebouxia_sp._gbA19	AC	1			1
Chlorophyta	Trebouxiophyceae	Microthamniales	Microthamniales_Incertae_sedis	Trebouxia	Trebouxia_sp._Lr	AC	1			1
Chlorophyta	Trebouxiophyceae	Microthamniales	Microthamniales_Incertae_sedis	Trebouxia	Trebouxia_sp._P-164-IXa-2	AC	1			1
Chlorophyta	Trebouxiophyceae	Microthamniales	Microthamniales_Incertae_sedis	Trebouxia	Trebouxia_sp._P-3-I	AC	1			1
Chlorophyta	Trebouxiophyceae	Microthamniales	Microthamniales_Incertae_sedis	Trebouxia	Trebouxia_sp._P-304-Ia	AC	1			1
Chlorophyta	Trebouxiophyceae	Microthamniales	Microthamniales_Incertae_sedis	Trebouxia	Trebouxia_sp._P-350a-III	AC	1			1
Chlorophyta	Trebouxiophyceae	Microthamniales	Microthamniales_Incertae_sedis	Trebouxia	Trebouxia_sp._P-360-I	AC	1			1
Chlorophyta	Trebouxiophyceae	Microthamniales	Microthamniales_Incertae_sedis	Trebouxia	Trebouxia_sp._Ri1	AC	1			1
Chlorophyta	Trebouxiophyceae	Microthamniales	Microthamniales_Incertae_sedis	Trebouxia	Trebouxia_sp._Ri2	AC	1			1
Chlorophyta	Trebouxiophyceae	Microthamniales	Microthamniales_Incertae_sedis	Trebouxia	Trebouxia_sp._TAE1	AC	1			1
Chlorophyta	Trebouxiophyceae	Microthamniales	Microthamniales_Incertae_sedis	Trebouxia	Trebouxia_sp._TPP1	AC	1			1
Chlorophyta	Trebouxiophyceae	Microthamniales	Microthamniales_Incertae_sedis	Trebouxia	Trebouxia_sp._TR1_LM-2014	AC	1			14
Chlorophyta	Trebouxiophyceae	Microthamniales	Microthamniales_Incertae_sedis	Trebouxia	Trebouxia_sp._TR9	AC	1			1
Chlorophyta	Trebouxiophyceae	Microthamniales	Microthamniales_Incertae_sedis	Trebouxia	Trebouxia_sp._TRS1	AC	1			1
Chlorophyta	Trebouxiophyceae	Microthamniales	Microthamniales_Incertae_sedis	Trebouxia	Trebouxia_sp._TSV1	AC	1			1
Chlorophyta	Trebouxiophyceae	Microthamniales	Microthamniales_Incertae_sedis	Trebouxia	Trebouxia_sp._TTC1	AC	1			1
Chlorophyta	Trebouxiophyceae	Microthamniales	Microthamniales_Incertae_sedis	Trebouxia	Trebouxia_sp._URa3	AC	1			6
Chlorophyta	Trebouxiophyceae	Microthamniales	Microthamniales_Incertae_sedis	Trebouxia	Trebouxia_suecica	AC	1			10
Chlorophyta	Trebouxiophyceae	Microthamniales	Microthamniales_Incertae_sedis	Trebouxia	uncultured_Trebouxia_photobiont	AC	0.994475			180						1
Chlorophyta	Trebouxiophyceae	Prasiolales	Koliellaceae	Koliella	Koliella_longiseta	AC	1			1
Chlorophyta	Trebouxiophyceae	Prasiolales	Koliellaceae	Koliella	Koliella_sempervirens	AC	1			1
Chlorophyta	Trebouxiophyceae	Prasiolales	Koliellaceae	Raphidonema	Raphidonema_nivale	AC	1			1
Chlorophyta	Trebouxiophyceae	Prasiolales	Prasiolaceae	Prasiola	Prasiola_sp._IGB-2016	AC	1			25
Chlorophyta	Trebouxiophyceae	Trebouxiophyceae_Incertae_sedis	Botryococcaceae	Botryococcus	Botryococcus_braunii	AC	1			3
Chlorophyta	Trebouxiophyceae	Trebouxiophyceae_Incertae_sedis	Coccomyxaceae	Coccomyxa	Coccomyxa_actinabiotis	AC	1			1
Chlorophyta	Trebouxiophyceae	Trebouxiophyceae_Incertae_sedis	Coccomyxaceae	Coccomyxa	Coccomyxa_simplex	AC	1			2
Chlorophyta	Trebouxiophyceae	Trebouxiophyceae_Incertae_sedis	Incertae_sedis	Dictyosphaerium	Dictyosphaerium_ehrenbergianum	AC	1			12
Chlorophyta	Trebouxiophyceae	Trebouxiophyceae_Incertae_sedis	Incertae_sedis	Dictyosphaerium	Dictyosphaerium_lacustre	AC	1			1
Chlorophyta	Trebouxiophyceae	Trebouxiophyceae_Incertae_sedis	Incertae_sedis	Dictyosphaerium	Dictyosphaerium_libertatis	AC	1			1
Chlorophyta	Trebouxiophyceae	Trebouxiophyceae_Incertae_sedis	Incertae_sedis	Dictyosphaerium	Dictyosphaerium_minutum	AC	1			1
Chlorophyta	Trebouxiophyceae	Trebouxiophyceae_Incertae_sedis	Incertae_sedis	Dictyosphaerium	Dictyosphaerium_sp.	AC	1			1
Chlorophyta	Trebouxiophyceae	Trebouxiophyceae_Incertae_sedis	Incertae_sedis	Dictyosphaerium	Dictyosphaerium_sp._165	AC	1			1
Chlorophyta	Trebouxiophyceae	Trebouxiophyceae_Incertae_sedis	Incertae_sedis	Dictyosphaerium	Dictyosphaerium_sp._168	AC	1			1
Chlorophyta	Trebouxiophyceae	Trebouxiophyceae_Incertae_sedis	Incertae_sedis	Dictyosphaerium	Dictyosphaerium_sp._8-1	AC	1			1
Chlorophyta	Trebouxiophyceae	Trebouxiophyceae_Incertae_sedis	Incertae_sedis	Dictyosphaerium	Dictyosphaerium_sp._ACOI_1988	AC	1			1
Chlorophyta	Trebouxiophyceae	Trebouxiophyceae_Incertae_sedis	Incertae_sedis	Dictyosphaerium	Dictyosphaerium_sp._CCAP_222/1C	AC	1			1
Chlorophyta	Trebouxiophyceae	Trebouxiophyceae_Incertae_sedis	Incertae_sedis	Dictyosphaerium	Dictyosphaerium_sp._CCAP_222/25	AC	1			1
Chlorophyta	Trebouxiophyceae	Trebouxiophyceae_Incertae_sedis	Incertae_sedis	Dictyosphaerium	Dictyosphaerium_sp._CCAP_222/36	AC	1			1
Chlorophyta	Trebouxiophyceae	Trebouxiophyceae_Incertae_sedis	Incertae_sedis	Dictyosphaerium	Dictyosphaerium_sp._CCAP_222/39	AC	1			1
Chlorophyta	Trebouxiophyceae	Trebouxiophyceae_Incertae_sedis	Incertae_sedis	Dictyosphaerium	Dictyosphaerium_sp._CCAP_222/40	AC	1			1
Chlorophyta	Trebouxiophyceae	Trebouxiophyceae_Incertae_sedis	Incertae_sedis	Dictyosphaerium	Dictyosphaerium_sp._CCAP_222/43	AC	1			1
Chlorophyta	Trebouxiophyceae	Trebouxiophyceae_Incertae_sedis	Incertae_sedis	Dictyosphaerium	Dictyosphaerium_sp._DQ1_1	AC	1			1
Chlorophyta	Trebouxiophyceae	Trebouxiophyceae_Incertae_sedis	Incertae_sedis	Dictyosphaerium	Dictyosphaerium_sp._GL28-1	AC	1			1
Chlorophyta	Trebouxiophyceae	Trebouxiophyceae_Incertae_sedis	Incertae_sedis	Dictyosphaerium	Dictyosphaerium_sp._GL29	AC	1			1
Chlorophyta	Trebouxiophyceae	Trebouxiophyceae_Incertae_sedis	Incertae_sedis	Dictyosphaerium	Dictyosphaerium_sp._HN361	AC	1			1
Chlorophyta	Trebouxiophyceae	Trebouxiophyceae_Incertae_sedis	Incertae_sedis	Dictyosphaerium	Dictyosphaerium_sp._HN362	AC	1			1
Chlorophyta	Trebouxiophyceae	Trebouxiophyceae_Incertae_sedis	Incertae_sedis	Dictyosphaerium	Dictyosphaerium_sp._HND1_3	AC	1			1
Chlorophyta	Trebouxiophyceae	Trebouxiophyceae_Incertae_sedis	Incertae_sedis	Dictyosphaerium	Dictyosphaerium_sp._HND2_5	AC	1			1
Chlorophyta	Trebouxiophyceae	Trebouxiophyceae_Incertae_sedis	Incertae_sedis	Dictyosphaerium	Dictyosphaerium_sp._HND2-3	AC	1			1
Chlorophyta	Trebouxiophyceae	Trebouxiophyceae_Incertae_sedis	Incertae_sedis	Dictyosphaerium	Dictyosphaerium_sp._HND35	AC	1			1
Chlorophyta	Trebouxiophyceae	Trebouxiophyceae_Incertae_sedis	Incertae_sedis	Dictyosphaerium	Dictyosphaerium_sp._HND38_3	AC	1			1
Chlorophyta	Trebouxiophyceae	Trebouxiophyceae_Incertae_sedis	Incertae_sedis	Dictyosphaerium	Dictyosphaerium_sp._JI6-1	AC	1			1
Chlorophyta	Trebouxiophyceae	Trebouxiophyceae_Incertae_sedis	Incertae_sedis	Dictyosphaerium	Dictyosphaerium_sp._JI7-7	AC	1			1
Chlorophyta	Trebouxiophyceae	Trebouxiophyceae_Incertae_sedis	Incertae_sedis	Dictyosphaerium	Dictyosphaerium_sp._JI8-2	AC	1			1
Chlorophyta	Trebouxiophyceae	Trebouxiophyceae_Incertae_sedis	Incertae_sedis	Dictyosphaerium	Dictyosphaerium_sp._qingdao10	AC	1			1
Chlorophyta	Trebouxiophyceae	Trebouxiophyceae_Incertae_sedis	Incertae_sedis	Dictyosphaerium	Dictyosphaerium_sp._shanxifenhe-1	AC	1			1
Chlorophyta	Trebouxiophyceae	Trebouxiophyceae_Incertae_sedis	Incertae_sedis	Dictyosphaerium	Dictyosphaerium_sp._wfA1	AC	1			1
Chlorophyta	Trebouxiophyceae	Trebouxiophyceae_Incertae_sedis	Incertae_sedis	Dictyosphaerium	Dictyosphaerium_sp._WfA2	AC	1			1
Chlorophyta	Trebouxiophyceae	Trebouxiophyceae_Incertae_sedis	Incertae_sedis	Dictyosphaerium	Dictyosphaerium_sp._XSBN8_3	AC	1			1
Chlorophyta	Trebouxiophyceae	Trebouxiophyceae_Incertae_sedis	Incertae_sedis	Dictyosphaerium	Dictyosphaerium_sp._XY16_6	AC	1			1
Chlorophyta	Trebouxiophyceae	Trebouxiophyceae_Incertae_sedis	Incertae_sedis	Dictyosphaerium	Dictyosphaerium_sp._YBY3_1	AC	1			1
Chlorophyta	Trebouxiophyceae	Trebouxiophyceae_Incertae_sedis	Incertae_sedis	Dictyosphaerium	Dictyosphaerium_sp._YN12-1	AC	1			1
Chlorophyta	Trebouxiophyceae	Trebouxiophyceae_Incertae_sedis	Incertae_sedis	Dictyosphaerium	Dictyosphaerium_sp._YN12-2	AC	1			1
Chlorophyta	Trebouxiophyceae	Trebouxiophyceae_Incertae_sedis	Incertae_sedis	Dictyosphaerium	Dictyosphaerium_sp._YN12-3	AC	1			1
Chlorophyta	Trebouxiophyceae	Trebouxiophyceae_Incertae_sedis	Incertae_sedis	Dictyosphaerium	Dictyosphaerium_sp._YN12-4	AC	1			1
Chlorophyta	Trebouxiophyceae	Trebouxiophyceae_Incertae_sedis	Incertae_sedis	Dictyosphaerium	Dictyosphaerium_sp._YN14-2	AC	1			1
Chlorophyta	Trebouxiophyceae	Trebouxiophyceae_Incertae_sedis	Incertae_sedis	Dictyosphaerium	Dictyosphaerium_sp._YN24_2	AC	1			1
Chlorophyta	Trebouxiophyceae	Trebouxiophyceae_Incertae_sedis	Incertae_sedis	Dictyosphaerium	Dictyosphaerium_sp._YN29-3	AC	1			1
Chlorophyta	Trebouxiophyceae	Trebouxiophyceae_Incertae_sedis	Incertae_sedis	Dictyosphaerium	Dictyosphaerium_sp._YN30-5	AC	1			1
Chlorophyta	Trebouxiophyceae	Trebouxiophyceae_Incertae_sedis	Incertae_sedis	Dictyosphaerium	Dictyosphaerium_sp._YN8_1	AC	1			1
Chlorophyta	Trebouxiophyceae	Trebouxiophyceae_Incertae_sedis	Incertae_sedis	Heterochlorella	Heterochlorella_luteoviridis	AC	1			1
Chlorophyta	Trebouxiophyceae	Trebouxiophyceae_Incertae_sedis	Incertae_sedis	Incertae_sedis	Trebouxiophyceae_sp._MCWWW1	AC	1			1
Chlorophyta	Trebouxiophyceae	Trebouxiophyceae_Incertae_sedis	Incertae_sedis	Incertae_sedis	Trebouxiophyceae_sp._MCWWW2	AC	1			1
Chlorophyta	Trebouxiophyceae	Trebouxiophyceae_Incertae_sedis	Incertae_sedis	Incertae_sedis	uncultured_Apatococcus	AC	1			9
Chlorophyta	Trebouxiophyceae	Trebouxiophyceae_Incertae_sedis	Incertae_sedis	Lunachloris	Lunachloris_lukesovae	AC	1			1
Chlorophyta	Trebouxiophyceae	Trebouxiophyceae_Incertae_sedis	Incertae_sedis	Parietochloris	Parietochloris_sp._KIOST-1	AC	1			1
Chlorophyta	Trebouxiophyceae	Trebouxiophyceae_Incertae_sedis	Incertae_sedis	Watanabea	Watanabea_sp._HST05	AC	1			1
Chlorophyta	Ulvophyceae	Bryopsidales	Bryopsidaceae	Bryopsis	Bryopsis_plumosa	AG	1							1
Chlorophyta	Ulvophyceae	Bryopsidales	Caulerpaceae	Caulerpa	Caulerpa_corynephora	AC	1			1
Chlorophyta	Ulvophyceae	Bryopsidales	Caulerpaceae	Caulerpa	Caulerpa_cupressoides	AC	1			2
Chlorophyta	Ulvophyceae	Bryopsidales	Caulerpaceae	Caulerpa	Caulerpa_lentillifera	AC	1			1
Chlorophyta	Ulvophyceae	Bryopsidales	Caulerpaceae	Caulerpa	Caulerpa_mexicana	AC	1			1
Chlorophyta	Ulvophyceae	Bryopsidales	Caulerpaceae	Caulerpa	Caulerpa_peltata	AC	1			1
Chlorophyta	Ulvophyceae	Bryopsidales	Caulerpaceae	Caulerpa	Caulerpa_racemosa	AC	1			15
Chlorophyta	Ulvophyceae	Bryopsidales	Caulerpaceae	Caulerpa	Caulerpa_serrulata	AC	1			1
Chlorophyta	Ulvophyceae	Bryopsidales	Caulerpaceae	Caulerpa	Caulerpa_sertularioides	AC	1			1
Chlorophyta	Ulvophyceae	Bryopsidales	Caulerpaceae	Caulerpa	Caulerpa_sp._CSMCRI_02122010001	AC	1			1
Chlorophyta	Ulvophyceae	Bryopsidales	Caulerpaceae	Caulerpa	Caulerpa_sp._CSMCRI_20130413001	AC	1			1
Chlorophyta	Ulvophyceae	Bryopsidales	Caulerpaceae	Caulerpa	Caulerpa_sp._CSMCRI_20130413002	AC	1			1
Chlorophyta	Ulvophyceae	Bryopsidales	Caulerpaceae	Caulerpa	Caulerpa_sp._CSMCRI_20130413003	AC	1			1
Chlorophyta	Ulvophyceae	Bryopsidales	Caulerpaceae	Caulerpa	Caulerpa_taxifolia	AC	1			75
Chlorophyta	Ulvophyceae	Bryopsidales	Caulerpaceae	Caulerpa	Caulerpa_verticillata	AC	1			2
Chlorophyta	Ulvophyceae	Bryopsidales	Halimedaceae	Halimeda	Halimeda_borneensis	AC	1			1
Chlorophyta	Ulvophyceae	Bryopsidales	Halimedaceae	Halimeda	Halimeda_cylindracea	AC	1			1
Chlorophyta	Ulvophyceae	Bryopsidales	Udoteaceae	Chlorodesmis	Chlorodesmis_caespitosa	AC	1			2
Chlorophyta	Ulvophyceae	Bryopsidales	Udoteaceae	Chlorodesmis	Chlorodesmis_fastigiata	AC	1			1
Chlorophyta	Ulvophyceae	Bryopsidales	Udoteaceae	Flabellia	Flabellia_petiolata	AC	1			2
Chlorophyta	Ulvophyceae	Bryopsidales	Udoteaceae	Penicillus	Penicillus_capitatus	AC	1			2
Chlorophyta	Ulvophyceae	Bryopsidales	Udoteaceae	Penicillus	Penicillus_dumetosus	AC	1			2
Chlorophyta	Ulvophyceae	Bryopsidales	Udoteaceae	Penicillus	Penicillus_nodulosus	AC	1			1
Chlorophyta	Ulvophyceae	Bryopsidales	Udoteaceae	Penicillus	Penicillus_pyriformis	AC	1			3
Chlorophyta	Ulvophyceae	Bryopsidales	Udoteaceae	Rhipiliopsis	Rhipiliopsis_reticulata	AC	1			1
Chlorophyta	Ulvophyceae	Bryopsidales	Udoteaceae	Rhipocephalus	Rhipocephalus_phoenix	AC	1			1
Chlorophyta	Ulvophyceae	Bryopsidales	Udoteaceae	Udotea	Udotea_abbottiorum	AC	1			1
Chlorophyta	Ulvophyceae	Bryopsidales	Udoteaceae	Udotea	Udotea_argentea	AC	1			1
Chlorophyta	Ulvophyceae	Bryopsidales	Udoteaceae	Udotea	Udotea_cyathiformis	AC	1			1
Chlorophyta	Ulvophyceae	Bryopsidales	Udoteaceae	Udotea	Udotea_dotyi	AC	1			1
Chlorophyta	Ulvophyceae	Bryopsidales	Udoteaceae	Udotea	Udotea_flabellum	AC	1			1
Chlorophyta	Ulvophyceae	Bryopsidales	Udoteaceae	Udotea	Udotea_norrisii	AC	1			1
Chlorophyta	Ulvophyceae	Bryopsidales	Udoteaceae	Udotea	Udotea_orientalis	AC	1			1
Chlorophyta	Ulvophyceae	Cladophorales	Cladophoraceae	Aegagropila	Aegagropila_linnaei	AC	1			1
Chlorophyta	Ulvophyceae	Cladophorales	Cladophoraceae	Cladophora	Cladophora_sp._ZZ-2016	AC	0.846154			11					1	1
Chlorophyta	Ulvophyceae	Cladophorales	Cladophoraceae	Rhizoclonium	Rhizoclonium_pachydermum	AC	1			1
Chlorophyta	Ulvophyceae	Cladophorales	Pithophoraceae	Wittrockiella	Wittrockiella_australis	AC	1			1
Chlorophyta	Ulvophyceae	Cladophorales	Pithophoraceae	Wittrockiella	Wittrockiella_lyallii	AC	1			6
Chlorophyta	Ulvophyceae	Cladophorales	Pithophoraceae	Wittrockiella	Wittrockiella_salina	AC	1			5
Chlorophyta	Ulvophyceae	Cladophorales	Pithophoraceae	Wittrockiella	Wittrockiella_zosterae	AC	1			1
Chlorophyta	Ulvophyceae	Ignatiales	Ignatiales_Incertae_sedis	Ignatius	Ignatius_tetrasporus	AC	1			1
Chlorophyta	Ulvophyceae	Trentepohliales	Trentepohliaceae	Cephaleuros	Cephaleuros_cf._expansus_HZ-2017	AC	1			2
Chlorophyta	Ulvophyceae	Trentepohliales	Trentepohliaceae	Cephaleuros	Cephaleuros_cf._parasiticus_HZ-2017	AC	1			1
Chlorophyta	Ulvophyceae	Trentepohliales	Trentepohliaceae	Cephaleuros	Cephaleuros_diffusus	AC	1			2
Chlorophyta	Ulvophyceae	Trentepohliales	Trentepohliaceae	Cephaleuros	Cephaleuros_expansus	AC	1			2
Chlorophyta	Ulvophyceae	Trentepohliales	Trentepohliaceae	Cephaleuros	Cephaleuros_karstenii	AC	1			2
Chlorophyta	Ulvophyceae	Trentepohliales	Trentepohliaceae	Cephaleuros	Cephaleuros_parasiticus	AC	1			2
Chlorophyta	Ulvophyceae	Trentepohliales	Trentepohliaceae	Cephaleuros	Cephaleuros_sp._HZ-2017	AC	1			3
Chlorophyta	Ulvophyceae	Trentepohliales	Trentepohliaceae	Cephaleuros	Cephaleuros_sp._HZ-2017a	AC	1			1
Chlorophyta	Ulvophyceae	Trentepohliales	Trentepohliaceae	Cephaleuros	Cephaleuros_sp._HZ-2017b	AC	1			1
Chlorophyta	Ulvophyceae	Trentepohliales	Trentepohliaceae	Cephaleuros	Cephaleuros_tumidae-setae	AC	1			1
Chlorophyta	Ulvophyceae	Trentepohliales	Trentepohliaceae	Cephaleuros	Cephaleuros_virescens	AC	1			5
Chlorophyta	Ulvophyceae	Trentepohliales	Trentepohliaceae	Phycopeltis	Phycopeltis_epiphyton	AC	1			2
Chlorophyta	Ulvophyceae	Trentepohliales	Trentepohliaceae	Phycopeltis	Phycopeltis_sp._YN1202	AC	1			1
Chlorophyta	Ulvophyceae	Trentepohliales	Trentepohliaceae	Printzina	Printzina_bosseae	AC	1			1
Chlorophyta	Ulvophyceae	Trentepohliales	Trentepohliaceae	Trentepohlia	Trentepohlia_aurea	AC	1			1
Chlorophyta	Ulvophyceae	Trentepohliales	Trentepohliaceae	Trentepohlia	Trentepohlia_cf._arborum_HZ-2017	AC	1			1
Chlorophyta	Ulvophyceae	Trentepohliales	Trentepohliaceae	Trentepohlia	Trentepohlia_rigidula	AC	1			1
Chlorophyta	Ulvophyceae	Trentepohliales	Trentepohliaceae	Trentepohlia	Trentepohlia_sp._HZ-2017	AC	1			15
Chlorophyta	Ulvophyceae	Ulotrichales	Ulotrichaceae	Acrosiphonia	Acrosiphonia_sp._SAG-127.80	AC	1			1
Chlorophyta	Ulvophyceae	Ulvales	Ulvales_Incertae_sedis	Desmochloris	Desmochloris_halophila	AC	1			2
Chlorophyta	Ulvophyceae	Ulvales	Ulvellaceae	Ulvella	Ulvella_leptochaete	AC	1			1
Chlorophyta	Ulvophyceae	Ulvophyceae_Incertae_sedis	Incertae_sedis	Incertae_sedis	Ulvophyceae_sp._SP1	AC	1			1
Chlorophyta	Ulvophyceae	Ulvophyceae_Incertae_sedis	Incertae_sedis	Incertae_sedis	uncultured_Ulvophyceae	AC	1			1
Chlorophyta	Ulvophyceae	Ulvophyceae_Incertae_sedis	Incertae_sedis	Oltmannsiellopsis	Oltmannsiellopsis_sp._CCMP1240	AC	1			1
Streptophyta	Bryopsida	Bryales	Bryaceae	Bryum	Bryum_argenteum	GT	1	1
Streptophyta	Bryopsida	Dicranales	Calymperaceae	Syrrhopodon	Syrrhopodon_banksii	GT	1	1
Streptophyta	Bryopsida	Dicranales	Calymperaceae	Syrrhopodon	Syrrhopodon_revolutus	GT	1	1
Streptophyta	Bryopsida	Dicranales	Dicranaceae	Dicranum	Dicranum_scoparium	GT	1	1
Streptophyta	Bryopsida	Dicranales	Leucobryaceae	Brothera	Brothera_leana	GT	1	1
Streptophyta	Bryopsida	Dicranales	Leucobryaceae	Dicranodontium	Dicranodontium_denudatum	GT	1	1
Streptophyta	Bryopsida	Dicranales	Leucobryaceae	Leucobryum	Leucobryum_aduncum	GT	1	7
Streptophyta	Bryopsida	Dicranales	Leucobryaceae	Leucobryum	Leucobryum_albidum	AT	1		4
Streptophyta	Bryopsida	Dicranales	Leucobryaceae	Leucobryum	Leucobryum_boninense	GT	1	7
Streptophyta	Bryopsida	Dicranales	Leucobryaceae	Leucobryum	Leucobryum_bowringii	GT	1	2
Streptophyta	Bryopsida	Dicranales	Leucobryaceae	Leucobryum	Leucobryum_chlorophyllosum	GT	1	3
Streptophyta	Bryopsida	Dicranales	Leucobryaceae	Leucobryum	Leucobryum_glaucum	AT	1		5
Streptophyta	Bryopsida	Dicranales	Leucobryaceae	Leucobryum	Leucobryum_humillimum	AT	1		5
Streptophyta	Bryopsida	Dicranales	Leucobryaceae	Leucobryum	Leucobryum_javense	GT	1	7
Streptophyta	Bryopsida	Dicranales	Leucobryaceae	Leucobryum	Leucobryum_juniperoideum	AT	0.956522		22				1
Streptophyta	Bryopsida	Dicranales	Leucobryaceae	Leucobryum	Leucobryum_madagassum	GT	1	1
Streptophyta	Bryopsida	Dicranales	Leucobryaceae	Leucobryum	Leucobryum_pachyphyllum	GT	1	2
Streptophyta	Bryopsida	Dicranales	Leucobryaceae	Leucobryum	Leucobryum_sanctum	GT	1	1
Streptophyta	Bryopsida	Dicranales	Leucobryaceae	Leucobryum	Leucobryum_scaberulum	GT	1	11
Streptophyta	Bryopsida	Dicranales	Leucobryaceae	Leucobryum	Leucobryum_scabrum	GT	1	7
Streptophyta	Bryopsida	Dicranales	Leucobryaceae	Leucobryum	Leucobryum_seemannii	GT	1	1
Streptophyta	Bryopsida	Dicranales	Leucobryaceae	Leucobryum	Leucobryum_sp._HIRO-EO-502	GT	1	1
Streptophyta	Bryopsida	Dicranales	Leucobryaceae	Leucobryum	Leucobryum_sp._HIRO-EO-503	GT	1	1
Streptophyta	Bryopsida	Dicranales	Leucobryaceae	Leucobryum	Leucobryum_sp._HIRO-TY-31990	GT	1	1
Streptophyta	Bryopsida	Dicranales	Leucobryaceae	Microcampylopus	Microcampylopus_curvisetus	GT	1	1
Streptophyta	Bryopsida	Dicranales	Leucobryaceae	Microcampylopus	Microcampylopus_khasianus	GT	1	1
Streptophyta	Bryopsida	Dicranales	Leucobryaceae	Pilopogon	Pilopogon_laevis	AC	1			1
Streptophyta	Bryopsida	Funariales	Funariaceae	Funaria	Funaria_hygrometrica	GT	1	1
Streptophyta	Bryopsida	Funariales	Funariaceae	Physcomitrella	Physcomitrella_patens	GT	1	1
Streptophyta	Bryopsida	Hookeriales	Hypopterygiaceae	Hypopterygium	Hypopterygium_sp._QZ-2015	AT	1		1
Streptophyta	Bryopsida	Hookeriales	Hypopterygiaceae	Hypopterygium	Hypopterygium_tamarisci	AT	1		2
Streptophyta	Bryopsida	Hypnales	Amblystegiaceae	Drepanocladus	Drepanocladus_lycopodioides	GT	1	70
Streptophyta	Bryopsida	Hypnales	Amblystegiaceae	Sarmentypnum	Sarmentypnum_exannulatum	GT	1	133
Streptophyta	Bryopsida	Hypnales	Amblystegiaceae	Sarmentypnum	Sarmentypnum_procerum	GT	1	2
Streptophyta	Bryopsida	Hypnales	Amblystegiaceae	Sarmentypnum	Sarmentypnum_sarmentosum	GT	1	1
Streptophyta	Bryopsida	Hypnales	Amblystegiaceae	Sarmentypnum	Sarmentypnum_tundrae	GT	1	1
Streptophyta	Bryopsida	Hypnales	Amblystegiaceae	Scorpidium	Scorpidium_cossonii	GT	1	85
Streptophyta	Bryopsida	Hypnales	Amblystegiaceae	Scorpidium	Scorpidium_revolvens	GT	1	5
Streptophyta	Bryopsida	Hypnales	Amblystegiaceae	Scorpidium	Scorpidium_scorpioides	GT	1	64
Streptophyta	Bryopsida	Hypnales	Brachytheciaceae	Bryhnia	Bryhnia_hultenii	GT	1	1
Streptophyta	Bryopsida	Hypnales	Brachytheciaceae	Donrichardsia	Donrichardsia_pringlei	GT	1	2
Streptophyta	Bryopsida	Hypnales	Brachytheciaceae	Eurhynchiastrum	Eurhynchiastrum_pulchellum	GT	1	2
Streptophyta	Bryopsida	Hypnales	Brachytheciaceae	Eurhynchium	Eurhynchium_striatum	GT	1	1
Streptophyta	Bryopsida	Hypnales	Brachytheciaceae	Kindbergia	Kindbergia_praelonga	GT	1	2
Streptophyta	Bryopsida	Hypnales	Brachytheciaceae	Oxyrrhynchium	Oxyrrhynchium_hians	GT	1	3
Streptophyta	Bryopsida	Hypnales	Brachytheciaceae	Oxyrrhynchium	Oxyrrhynchium_selaginellifolium	GT	1	1
Streptophyta	Bryopsida	Hypnales	Brachytheciaceae	Oxyrrhynchium	Oxyrrhynchium_sp._2_(Buck_23824)	GT	1	1
Streptophyta	Bryopsida	Hypnales	Brachytheciaceae	Platyhypnidium	Platyhypnidium_fuegianum	GT	1	2
Streptophyta	Bryopsida	Hypnales	Brachytheciaceae	Rhynchostegium	Rhynchostegium_aquaticum	GT	1	1
Streptophyta	Bryopsida	Hypnales	Brachytheciaceae	Rhynchostegium	Rhynchostegium_muelleri	GT	1	2
Streptophyta	Bryopsida	Hypnales	Brachytheciaceae	Rhynchostegium	Rhynchostegium_riparioides	GT	1	5
Streptophyta	Bryopsida	Hypnales	Brachytheciaceae	Rhynchostegium	Rhynchostegium_serrulatum	GT	1	4
Streptophyta	Bryopsida	Hypnales	Calliergonaceae	Calliergon	Calliergon_cordifolium	GT	1	1
Streptophyta	Bryopsida	Hypnales	Calliergonaceae	Calliergon	Calliergon_giganteum	GT	1	1
Streptophyta	Bryopsida	Hypnales	Calliergonaceae	Calliergon	Calliergon_megalophyllum	GT	1	1
Streptophyta	Bryopsida	Hypnales	Calliergonaceae	Calliergon	Calliergon_richardsonii	GT	1	1
Streptophyta	Bryopsida	Hypnales	Calliergonaceae	Hamatocaulis	Hamatocaulis_vernicosus	GT	1	25
Streptophyta	Bryopsida	Hypnales	Calliergonaceae	Loeskypnum	Loeskypnum_badium	GT	1	1
Streptophyta	Bryopsida	Hypnales	Calliergonaceae	Loeskypnum	Loeskypnum_wickesiae	GT	1	1
Streptophyta	Bryopsida	Hypnales	Calliergonaceae	Warnstorfia	Warnstorfia_pseudostraminea	GT	1	1
Streptophyta	Bryopsida	Hypnales	Fontinalaceae	Fontinalis	Fontinalis_sp._SRC-2010	GT	1	1
Streptophyta	Bryopsida	Hypnales	Hylocomiaceae	Leptocladiella	Leptocladiella_delicatula	GT	1	1
Streptophyta	Bryopsida	Hypnales	Hypnaceae	Buckiella	Buckiella_draytonii	GT	1	1
Streptophyta	Bryopsida	Hypnales	Hypnaceae	Buckiella	Buckiella_undulata	GT	1	1
Streptophyta	Bryopsida	Hypnales	Hypnaceae	Phyllodon	Phyllodon_lingulatus	GT	1	1
Streptophyta	Bryopsida	Hypnales	Hypnaceae	Taxiphyllum	Taxiphyllum_sp._Long_33614	GT	1	1
Streptophyta	Bryopsida	Hypnales	Plagiotheciaceae	Herzogiella	Herzogiella_seligeri	GT	1	1
Streptophyta	Bryopsida	Hypnales	Plagiotheciaceae	Isopterygiopsis	Isopterygiopsis_muelleriana	GT	1	2
Streptophyta	Bryopsida	Hypnales	Plagiotheciaceae	Plagiothecium	Plagiothecium_cavifolium	GT	1	2
Streptophyta	Bryopsida	Hypnales	Plagiotheciaceae	Plagiothecium	Plagiothecium_curvifolium	GT	1	2
Streptophyta	Bryopsida	Hypnales	Plagiotheciaceae	Plagiothecium	Plagiothecium_denticulatum	GT	1	2
Streptophyta	Bryopsida	Hypnales	Plagiotheciaceae	Plagiothecium	Plagiothecium_euryphyllum	GT	1	1
Streptophyta	Bryopsida	Hypnales	Plagiotheciaceae	Plagiothecium	Plagiothecium_handelii	GT	1	1
Streptophyta	Bryopsida	Hypnales	Plagiotheciaceae	Plagiothecium	Plagiothecium_laetum	GT	1	1
Streptophyta	Bryopsida	Hypnales	Plagiotheciaceae	Plagiothecium	Plagiothecium_latebricola	GT	1	1
Streptophyta	Bryopsida	Hypnales	Plagiotheciaceae	Plagiothecium	Plagiothecium_neckeroideum	GT	1	1
Streptophyta	Bryopsida	Hypnales	Plagiotheciaceae	Plagiothecium	Plagiothecium_nemorale	GT	1	4
Streptophyta	Bryopsida	Hypnales	Plagiotheciaceae	Plagiothecium	Plagiothecium_piliferum	GT	1	1
Streptophyta	Bryopsida	Hypnales	Plagiotheciaceae	Plagiothecium	Plagiothecium_platyphyllum	GT	1	1
Streptophyta	Bryopsida	Hypnales	Plagiotheciaceae	Plagiothecium	Plagiothecium_ruthei	GT	1	1
Streptophyta	Bryopsida	Hypnales	Plagiotheciaceae	Plagiothecium	Plagiothecium_succulentum	GT	1	2
Streptophyta	Bryopsida	Hypnales	Plagiotheciaceae	Pseudotaxiphyllum	Pseudotaxiphyllum_distichaceum	GT	1	3
Streptophyta	Bryopsida	Hypnales	Plagiotheciaceae	Pseudotaxiphyllum	Pseudotaxiphyllum_elegans	GT	1	6
Streptophyta	Bryopsida	Hypnales	Plagiotheciaceae	Pseudotaxiphyllum	Pseudotaxiphyllum_laetevirens	GT	1	1
Streptophyta	Bryopsida	Hypnales	Plagiotheciaceae	Pseudotaxiphyllum	Pseudotaxiphyllum_maebarae	GT	1	7
Streptophyta	Bryopsida	Hypnales	Plagiotheciaceae	Pseudotaxiphyllum	Pseudotaxiphyllum_obtusifolium	GT	1	2
Streptophyta	Bryopsida	Hypnales	Plagiotheciaceae	Pseudotaxiphyllum	Pseudotaxiphyllum_pohliicarpum	GT	1	21
Streptophyta	Bryopsida	Hypnales	Pylaisiadelphaceae	Isopterygium	Isopterygium_tenerum	GT	1	1
Streptophyta	Bryopsida	Hypnales	Sematophyllaceae	Clastobryophilum	Clastobryophilum_bogoricum	GT	1	1
Streptophyta	Bryopsida	Hypnales	Sematophyllaceae	Donnellia	Donnellia_lageniformis	GT	1	1
Streptophyta	Bryopsida	Hypnales	Sematophyllaceae	Sematophyllum	Sematophyllum_amnigenum	GT	1	1
Streptophyta	Bryopsida	Pottiales	Pottiaceae	Hyophila	Hyophila_involuta	GT	1	1
Streptophyta	Bryopsida	Pseudoditrichales	Ditrichaceae	Ceratodon	Ceratodon_heterophyllus	GT	1	2
Streptophyta	Bryopsida	Pseudoditrichales	Ditrichaceae	Ceratodon	Ceratodon_purpureus	GT	1	112
Streptophyta	Bryopsida	Rhizogoniales	Aulacomniaceae	Aulacomnium	Aulacomnium_palustre	GT	1	1
Streptophyta	Charophyceae	Charales	Characeae	Chara	Chara_braunii	AT	1		1
Streptophyta	Charophyceae	Charales	Characeae	Chara	Chara_globularis	AT	1		1
Streptophyta	Charophyceae	Charales	Characeae	Chara	Chara_haitensis	AT	1		1
Streptophyta	Charophyceae	Charales	Characeae	Chara	Chara_hornemannii	AT	1		1
Streptophyta	Charophyceae	Charales	Characeae	Lamprothamnium	Lamprothamnium_succinctum	AT	1		1
Streptophyta	Charophyceae	Charales	Characeae	Lychnothamnus	Lychnothamnus_barbatus	AT	1		1
Streptophyta	Charophyceae	Charales	Characeae	Nitella	Nitella_axillaris	AT	1		1
Streptophyta	Charophyceae	Charales	Characeae	Nitella	Nitella_capillata	AT	1		1
Streptophyta	Charophyceae	Charales	Characeae	Nitella	Nitella_clavata	AG	1							1
Streptophyta	Charophyceae	Charales	Characeae	Nitella	Nitella_confervacea	AT	1		1
Streptophyta	Charophyceae	Charales	Characeae	Nitella	Nitella_flexilis	AT	1		1
Streptophyta	Charophyceae	Charales	Characeae	Nitella	Nitella_hyalina	AT	1		1
Streptophyta	Charophyceae	Charales	Characeae	Nitellopsis	Nitellopsis_obtusa	AT	1		1
Streptophyta	Charophyceae	Charales	Characeae	Tolypella	Tolypella_boldii	AT	1		1
Streptophyta	Charophyceae	Charales	Characeae	Tolypella	Tolypella_canadensis	AT	1		1
Streptophyta	Charophyceae	Charales	Characeae	Tolypella	Tolypella_glomerata	AT	1		5
Streptophyta	Charophyceae	Charales	Characeae	Tolypella	Tolypella_hispanica	AT	1		1
Streptophyta	Charophyceae	Charales	Characeae	Tolypella	Tolypella_intricata	AT	1		2
Streptophyta	Charophyceae	Charales	Characeae	Tolypella	Tolypella_porteri	AT	1		1
Streptophyta	Charophyceae	Charales	Characeae	Tolypella	Tolypella_prolifera	AT	1		1
Streptophyta	Charophyceae	Charales	Characeae	Tolypella	Tolypella_ramosissima	AT	1		2
Streptophyta	Charophyceae	Charales	Characeae	Tolypella	Tolypella_sp._MC_R839	AT	1		1
Streptophyta	Charophyceae	Charales	Characeae	Tolypella	Tolypella_sp._MC_R861	AT	1		1
Streptophyta	Charophyceae	Charales	Characeae	Tolypella	Tolypella_stipitata	AT	1		2
Streptophyta	Coleochaetophyceae	Coleochaetales	Chaetosphaeridiaceae	Chaetosphaeridium	Chaetosphaeridium_pringsheimii	AC	1			1
Streptophyta	Coleochaetophyceae	Coleochaetales	Coleochaetaceae	Coleochaete	Coleochaete_pulvinata	AT	1		1
Streptophyta	Jungermanniopsida	Jungermanniales	Adelanthaceae	Adelanthus	Adelanthus_decipiens	GT	1	2
Streptophyta	Jungermanniopsida	Jungermanniales	Adelanthaceae	Adelanthus	Adelanthus_falcatus	GT	1	1
Streptophyta	Jungermanniopsida	Jungermanniales	Adelanthaceae	Adelanthus	Adelanthus_gemmiparus	GT	1	1
Streptophyta	Jungermanniopsida	Jungermanniales	Adelanthaceae	Adelanthus	Adelanthus_lindenbergianus	GT	1	1
Streptophyta	Jungermanniopsida	Jungermanniales	Adelanthaceae	Wettsteinia	Wettsteinia_schusteriana	GT	1	1
Streptophyta	Jungermanniopsida	Jungermanniales	Anastrophyllaceae	Barbilophozia	Barbilophozia_barbata	GT	1	1
Streptophyta	Jungermanniopsida	Jungermanniales	Anastrophyllaceae	Sphenolobus	Sphenolobus_minutus	GT	1	1
Streptophyta	Jungermanniopsida	Jungermanniales	Brevianthaceae	Tetracymbaliella	Tetracymbaliella_cymbalifera	GT	1	1
Streptophyta	Jungermanniopsida	Jungermanniales	Brevianthaceae	Tetracymbaliella	Tetracymbaliella_rodwayana	GT	1	4
Streptophyta	Jungermanniopsida	Jungermanniales	Cephaloziaceae	Alobiellopsis	Alobiellopsis_dominicensis	GT	1	1
Streptophyta	Jungermanniopsida	Jungermanniales	Cephaloziaceae	Cephalozia	Cephalozia_bicuspidata	GT	1	2
Streptophyta	Jungermanniopsida	Jungermanniales	Cephaloziaceae	Fuscocephaloziopsis	Fuscocephaloziopsis_catenulata	GT	1	1
Streptophyta	Jungermanniopsida	Jungermanniales	Cephaloziaceae	Fuscocephaloziopsis	Fuscocephaloziopsis_connivens	GT	1	2
Streptophyta	Jungermanniopsida	Jungermanniales	Cephaloziaceae	Fuscocephaloziopsis	Fuscocephaloziopsis_crassifolia	GT	1	1
Streptophyta	Jungermanniopsida	Jungermanniales	Cephaloziaceae	Fuscocephaloziopsis	Fuscocephaloziopsis_gollanii	GT	1	1
Streptophyta	Jungermanniopsida	Jungermanniales	Cephaloziaceae	Fuscocephaloziopsis	Fuscocephaloziopsis_loitlesbergeri	GT	1	1
Streptophyta	Jungermanniopsida	Jungermanniales	Cephaloziaceae	Fuscocephaloziopsis	Fuscocephaloziopsis_pachycaulis	GT	1	1
Streptophyta	Jungermanniopsida	Jungermanniales	Cephaloziaceae	Fuscocephaloziopsis	Fuscocephaloziopsis_pulvinata	GT	1	1
Streptophyta	Jungermanniopsida	Jungermanniales	Gymnomitriaceae	Nothogymnomitrion	Nothogymnomitrion_erosum	GT	1	1
Streptophyta	Jungermanniopsida	Jungermanniales	Jamesoniellaceae	Anomacaulis	Anomacaulis_flaccidus	GT	1	1
Streptophyta	Jungermanniopsida	Jungermanniales	Jamesoniellaceae	Cuspidatula	Cuspidatula_contracta	GT	1	2
Streptophyta	Jungermanniopsida	Jungermanniales	Jamesoniellaceae	Cuspidatula	Cuspidatula_monodon	GT	1	1
Streptophyta	Jungermanniopsida	Jungermanniales	Jungermanniaceae	Cryptochila	Cryptochila_grandiflora	GT	1	1
Streptophyta	Jungermanniopsida	Jungermanniales	Jungermanniaceae	Cryptochila	Cryptochila_pseudocclusa	GT	1	1
Streptophyta	Jungermanniopsida	Jungermanniales	Jungermanniaceae	Jamesoniella	Jamesoniella_colorata	GT	1	3
Streptophyta	Jungermanniopsida	Jungermanniales	Jungermanniaceae	Jamesoniella	Jamesoniella_kirkii	GT	1	1
Streptophyta	Jungermanniopsida	Jungermanniales	Jungermanniaceae	Jamesoniella	Jamesoniella_undata	GT	1	2
Streptophyta	Jungermanniopsida	Jungermanniales	Jungermanniaceae	Jamesoniella	Syzygiella_nipponica	GT	1	1
Streptophyta	Jungermanniopsida	Jungermanniales	Jungermanniaceae	Mesoptychia	Mesoptychia_sp._Mamontov_386-5	GT	1	1
Streptophyta	Jungermanniopsida	Jungermanniales	Jungermanniaceae	Mesoptychia	Mesoptychia_sp._Mamontov_392-3	GT	1	1
Streptophyta	Jungermanniopsida	Jungermanniales	Jungermanniaceae	Syzygiella	Syzygiella_anomala	GT	1	1
Streptophyta	Jungermanniopsida	Jungermanniales	Jungermanniaceae	Syzygiella	Syzygiella_autumnalis	GT	1	1
Streptophyta	Jungermanniopsida	Jungermanniales	Jungermanniaceae	Syzygiella	Syzygiella_campanulata	GT	1	1
Streptophyta	Jungermanniopsida	Jungermanniales	Jungermanniaceae	Syzygiella	Syzygiella_cf._campanulata_KF-2009	GT	1	1
Streptophyta	Jungermanniopsida	Jungermanniales	Jungermanniaceae	Syzygiella	Syzygiella_cf._pectiniformis_KF-2009	GT	1	2
Streptophyta	Jungermanniopsida	Jungermanniales	Jungermanniaceae	Syzygiella	Syzygiella_concreta	GT	1	1
Streptophyta	Jungermanniopsida	Jungermanniales	Jungermanniaceae	Syzygiella	Syzygiella_geminifolia	GT	1	2
Streptophyta	Jungermanniopsida	Jungermanniales	Jungermanniaceae	Syzygiella	Syzygiella_perfoliata	GT	1	1
Streptophyta	Jungermanniopsida	Jungermanniales	Jungermanniaceae	Syzygiella	Syzygiella_rubricaulis	GT	1	3
Streptophyta	Jungermanniopsida	Jungermanniales	Jungermanniaceae	Syzygiella	Syzygiella_securifolia	GT	1	1
Streptophyta	Jungermanniopsida	Jungermanniales	Jungermanniaceae	Syzygiella	Syzygiella_subintegerrima	AG	0.5	1						1
Streptophyta	Jungermanniopsida	Jungermanniales	Jungermanniaceae	Syzygiella	Syzygiella_tonduzana	GT	1	2
Streptophyta	Jungermanniopsida	Jungermanniales	Lepidoziaceae	Telaranea	Telaranea_europaea	GT	1	1
Streptophyta	Jungermanniopsida	Jungermanniales	Lepidoziaceae	Tricholepidozia	Tricholepidozia_murphyae	GT	1	2
Streptophyta	Jungermanniopsida	Jungermanniales	Lepidoziaceae	Tricholepidozia	Tricholepidozia_tetradactyla	GT	1	3
Streptophyta	Jungermanniopsida	Jungermanniales	Plagiochilaceae	Chiastocaulon	Chiastocaulon_oppositum	GT	1	1
Streptophyta	Jungermanniopsida	Jungermanniales	Plagiochilaceae	Chiastocaulon	Chiastocaulon_proliferum	GT	1	3
Streptophyta	Jungermanniopsida	Jungermanniales	Plagiochilaceae	Dinckleria	Dinckleria_fruticella	GT	1	1
Streptophyta	Jungermanniopsida	Jungermanniales	Plagiochilaceae	Plagiochila	Plagiochila_aff._gregaria_F1141352	GT	1	1
Streptophyta	Jungermanniopsida	Jungermanniales	Plagiochilaceae	Plagiochila	Plagiochila_aff._peculiaris_NSW	GT	1	1
Streptophyta	Jungermanniopsida	Jungermanniales	Plagiochilaceae	Plagiochila	Plagiochila_aff._peculiaris_NSW980513	GT	1	1
Streptophyta	Jungermanniopsida	Jungermanniales	Plagiochilaceae	Plagiochila	Plagiochila_annotina	GT	1	3
Streptophyta	Jungermanniopsida	Jungermanniales	Plagiochilaceae	Plagiochila	Plagiochila_baileyana	GT	1	1
Streptophyta	Jungermanniopsida	Jungermanniales	Plagiochilaceae	Plagiochila	Plagiochila_bazzanioides	GT	1	1
Streptophyta	Jungermanniopsida	Jungermanniales	Plagiochilaceae	Plagiochila	Plagiochila_caducifolia	GT	1	1
Streptophyta	Jungermanniopsida	Jungermanniales	Plagiochilaceae	Plagiochila	Plagiochila_conturbata	GT	1	3
Streptophyta	Jungermanniopsida	Jungermanniales	Plagiochilaceae	Plagiochila	Plagiochila_fasciculata	GT	1	3
Streptophyta	Jungermanniopsida	Jungermanniales	Plagiochilaceae	Plagiochila	Plagiochila_fragmentissima	GT	1	1
Streptophyta	Jungermanniopsida	Jungermanniales	Plagiochilaceae	Plagiochila	Plagiochila_gigantea	GT	1	2
Streptophyta	Jungermanniopsida	Jungermanniales	Plagiochilaceae	Plagiochila	Plagiochila_gymnoclada	GT	1	1
Streptophyta	Jungermanniopsida	Jungermanniales	Plagiochilaceae	Plagiochila	Plagiochila_incurvicolla	GT	1	3
Streptophyta	Jungermanniopsida	Jungermanniales	Plagiochilaceae	Plagiochila	Plagiochila_retrospectans	GT	1	2
Streptophyta	Jungermanniopsida	Jungermanniales	Plagiochilaceae	Plagiochila	Plagiochila_sinclairii	GT	1	2
Streptophyta	Jungermanniopsida	Jungermanniales	Plagiochilaceae	Plagiochila	Plagiochila_sp._AK327793	GT	1	1
Streptophyta	Jungermanniopsida	Jungermanniales	Plagiochilaceae	Plagiochila	Plagiochila_sp._NSW880509	GT	1	1
Streptophyta	Jungermanniopsida	Jungermanniales	Plagiochilaceae	Plagiochila	Plagiochila_sp._NSW900037	GT	1	1
Streptophyta	Jungermanniopsida	Jungermanniales	Plagiochilaceae	Plagiochila	Plagiochila_strombifolia	AG	0.5	3						3
Streptophyta	Jungermanniopsida	Jungermanniales	Plagiochilaceae	Plagiochila	Plagiochila_subflabellata	GT	1	2
Streptophyta	Jungermanniopsida	Jungermanniales	Plagiochilaceae	Plagiochila	Plagiochila_trigona	GT	1	1
Streptophyta	Jungermanniopsida	Jungermanniales	Scapaniaceae	Scapania	Scapania_aspera	GT	1	1
Streptophyta	Jungermanniopsida	Jungermanniales	Scapaniaceae	Scapania	Scapania_koponenii	AG	1							1
Streptophyta	Jungermanniopsida	Metzgeriales	Aneuraceae	Aneura	Aneura_maxima	GT	1	1
Streptophyta	Jungermanniopsida	Metzgeriales	Aneuraceae	Aneura	Aneura_mirabilis	GT	1	4
Streptophyta	Jungermanniopsida	Metzgeriales	Aneuraceae	Aneura	Aneura_pinguis	GT	1	3
Streptophyta	Jungermanniopsida	Metzgeriales	Metzgeriaceae	Metzgeria	Metzgeria_conjugata	GT	1	27
Streptophyta	Jungermanniopsida	Metzgeriales	Metzgeriaceae	Metzgeria	Metzgeria_furcata	GT	1	5
Streptophyta	Jungermanniopsida	Metzgeriales	Metzgeriaceae	Metzgeria	Metzgeria_leptoneura	GT	1	1
Streptophyta	Jungermanniopsida	Metzgeriales	Metzgeriaceae	Metzgeria	Metzgeria_myriopoda	GT	1	10
Streptophyta	Jungermanniopsida	Metzgeriales	Metzgeriaceae	Metzgeria	Metzgeria_polytricha	GT	1	1
Streptophyta	Jungermanniopsida	Pelliales	Pelliaceae	Pellia	Pellia_neesiana	GT	1	1
Streptophyta	Jungermanniopsida	Porellales	Frullaniaceae	Frullania	Frullania_aculeata	GT	1	2
Streptophyta	Jungermanniopsida	Porellales	Frullaniaceae	Frullania	Frullania_acutiloba	GT	1	1
Streptophyta	Jungermanniopsida	Porellales	Frullaniaceae	Frullania	Frullania_aff._neurota_Costa_&_Gradstein_3712	GT	1	1
Streptophyta	Jungermanniopsida	Porellales	Frullaniaceae	Frullania	Frullania_allanii	GT	1	1
Streptophyta	Jungermanniopsida	Porellales	Frullaniaceae	Frullania	Frullania_amplicrania	GT	1	1
Streptophyta	Jungermanniopsida	Porellales	Frullaniaceae	Frullania	Frullania_ampullifera	GT	1	1
Streptophyta	Jungermanniopsida	Porellales	Frullaniaceae	Frullania	Frullania_anderssonii	GT	1	1
Streptophyta	Jungermanniopsida	Porellales	Frullaniaceae	Frullania	Frullania_angulata	GT	1	1
Streptophyta	Jungermanniopsida	Porellales	Frullaniaceae	Frullania	Frullania_anomala	GT	1	2
Streptophyta	Jungermanniopsida	Porellales	Frullaniaceae	Frullania	Frullania_apicalis	GT	1	1
Streptophyta	Jungermanniopsida	Porellales	Frullaniaceae	Frullania	Frullania_apiculata	GT	1	1
Streptophyta	Jungermanniopsida	Porellales	Frullaniaceae	Frullania	Frullania_appalachiana	GT	1	3
Streptophyta	Jungermanniopsida	Porellales	Frullaniaceae	Frullania	Frullania_arecae	GT	1	3
Streptophyta	Jungermanniopsida	Porellales	Frullaniaceae	Frullania	Frullania_asagrayana	GT	1	11
Streptophyta	Jungermanniopsida	Porellales	Frullaniaceae	Frullania	Frullania_aterrima	GT	1	1
Streptophyta	Jungermanniopsida	Porellales	Frullaniaceae	Frullania	Frullania_atrata	GT	1	1
Streptophyta	Jungermanniopsida	Porellales	Frullaniaceae	Frullania	Frullania_azorica	GT	1	5
Streptophyta	Jungermanniopsida	Porellales	Frullaniaceae	Frullania	Frullania_baladina	GT	1	1
Streptophyta	Jungermanniopsida	Porellales	Frullaniaceae	Frullania	Frullania_berthoumieuii	GT	1	1
Streptophyta	Jungermanniopsida	Porellales	Frullaniaceae	Frullania	Frullania_bolanderi	GT	1	1
Streptophyta	Jungermanniopsida	Porellales	Frullaniaceae	Frullania	Frullania_brasiliensis	GT	1	3
Streptophyta	Jungermanniopsida	Porellales	Frullaniaceae	Frullania	Frullania_brittoniae	GT	1	1
Streptophyta	Jungermanniopsida	Porellales	Frullaniaceae	Frullania	Frullania_caffraria	GT	1	1
Streptophyta	Jungermanniopsida	Porellales	Frullaniaceae	Frullania	Frullania_calcarifera	GT	1	4
Streptophyta	Jungermanniopsida	Porellales	Frullaniaceae	Frullania	Frullania_californica	GT	1	5
Streptophyta	Jungermanniopsida	Porellales	Frullaniaceae	Frullania	Frullania_cf._fulfordiae_Pocs_&_Pocs_01048/N	GT	1	1
Streptophyta	Jungermanniopsida	Porellales	Frullaniaceae	Frullania	Frullania_chevalieri	GT	0.978261	45						1
Streptophyta	Jungermanniopsida	Porellales	Frullaniaceae	Frullania	Frullania_congesta	GT	1	1
Streptophyta	Jungermanniopsida	Porellales	Frullaniaceae	Frullania	Frullania_davurica	GT	1	1
Streptophyta	Jungermanniopsida	Porellales	Frullaniaceae	Frullania	Frullania_deplanata	GT	1	1
Streptophyta	Jungermanniopsida	Porellales	Frullaniaceae	Frullania	Frullania_depressa	GT	1	1
Streptophyta	Jungermanniopsida	Porellales	Frullaniaceae	Frullania	Frullania_dilatata	GT	1	17
Streptophyta	Jungermanniopsida	Porellales	Frullaniaceae	Frullania	Frullania_diptera	GT	1	1
Streptophyta	Jungermanniopsida	Porellales	Frullaniaceae	Frullania	Frullania_duthiana	GT	1	1
Streptophyta	Jungermanniopsida	Porellales	Frullaniaceae	Frullania	Frullania_eboracensis	GT	1	12
Streptophyta	Jungermanniopsida	Porellales	Frullaniaceae	Frullania	Frullania_echinantha	GT	1	1
Streptophyta	Jungermanniopsida	Porellales	Frullaniaceae	Frullania	Frullania_ecklonii	GT	1	2
Streptophyta	Jungermanniopsida	Porellales	Frullaniaceae	Frullania	Frullania_ericoides	GT	1	7
Streptophyta	Jungermanniopsida	Porellales	Frullaniaceae	Frullania	Frullania_eymae	GT	1	1
Streptophyta	Jungermanniopsida	Porellales	Frullaniaceae	Frullania	Frullania_falciloba	GT	1	2
Streptophyta	Jungermanniopsida	Porellales	Frullaniaceae	Frullania	Frullania_ferdinandi-muelleri	GT	1	2
Streptophyta	Jungermanniopsida	Porellales	Frullaniaceae	Frullania	Frullania_fertilis	GT	0.833333	20	4
Streptophyta	Jungermanniopsida	Porellales	Frullaniaceae	Frullania	Frullania_fragilifolia	GT	1	3
Streptophyta	Jungermanniopsida	Porellales	Frullaniaceae	Frullania	Frullania_franciscana	GT	1	4
Streptophyta	Jungermanniopsida	Porellales	Frullaniaceae	Frullania	Frullania_fugax	GT	1	1
Streptophyta	Jungermanniopsida	Porellales	Frullaniaceae	Frullania	Frullania_fuscovirens	GT	1	1
Streptophyta	Jungermanniopsida	Porellales	Frullaniaceae	Frullania	Frullania_gaudichaudii	GT	1	2
Streptophyta	Jungermanniopsida	Porellales	Frullaniaceae	Frullania	Frullania_gibbosa	GT	1	1
Streptophyta	Jungermanniopsida	Porellales	Frullaniaceae	Frullania	Frullania_glomerata	GT	1	1
Streptophyta	Jungermanniopsida	Porellales	Frullaniaceae	Frullania	Frullania_gracilis	GT	1	1
Streptophyta	Jungermanniopsida	Porellales	Frullaniaceae	Frullania	Frullania_grossiclava	GT	1	1
Streptophyta	Jungermanniopsida	Porellales	Frullaniaceae	Frullania	Frullania_hamata	GT	1	1
Streptophyta	Jungermanniopsida	Porellales	Frullaniaceae	Frullania	Frullania_hattorii	GT	1	1
Streptophyta	Jungermanniopsida	Porellales	Frullaniaceae	Frullania	Frullania_holostipula	GT	1	1
Streptophyta	Jungermanniopsida	Porellales	Frullaniaceae	Frullania	Frullania_howeana	GT	1	1
Streptophyta	Jungermanniopsida	Porellales	Frullaniaceae	Frullania	Frullania_hypoleuca	GT	1	1
Streptophyta	Jungermanniopsida	Porellales	Frullaniaceae	Frullania	Frullania_incumbens	GT	1	1
Streptophyta	Jungermanniopsida	Porellales	Frullaniaceae	Frullania	Frullania_inflata	GT	1	1
Streptophyta	Jungermanniopsida	Porellales	Frullaniaceae	Frullania	Frullania_intermedia	GT	1	2
Streptophyta	Jungermanniopsida	Porellales	Frullaniaceae	Frullania	Frullania_intumescens	GT	1	1
Streptophyta	Jungermanniopsida	Porellales	Frullaniaceae	Frullania	Frullania_jackii	GT	1	1
Streptophyta	Jungermanniopsida	Porellales	Frullaniaceae	Frullania	Frullania_junghuhniana	GT	1	16
Streptophyta	Jungermanniopsida	Porellales	Frullaniaceae	Frullania	Frullania_knightbridgei	GT	1	1
Streptophyta	Jungermanniopsida	Porellales	Frullaniaceae	Frullania	Frullania_kunzei	GT	1	2
Streptophyta	Jungermanniopsida	Porellales	Frullaniaceae	Frullania	Frullania_lobulata	GT	0.888889	8	1
Streptophyta	Jungermanniopsida	Porellales	Frullaniaceae	Frullania	Frullania_longistipula	GT	1	1
Streptophyta	Jungermanniopsida	Porellales	Frullaniaceae	Frullania	Frullania_magellanica	GT	0.928571	13	1
Streptophyta	Jungermanniopsida	Porellales	Frullaniaceae	Frullania	Frullania_meyeniana	GT	1	1
Streptophyta	Jungermanniopsida	Porellales	Frullaniaceae	Frullania	Frullania_microcaulis	GT	1	8
Streptophyta	Jungermanniopsida	Porellales	Frullaniaceae	Frullania	Frullania_microphylla	GT	1	4
Streptophyta	Jungermanniopsida	Porellales	Frullaniaceae	Frullania	Frullania_microscopica	GT	1	5
Streptophyta	Jungermanniopsida	Porellales	Frullaniaceae	Frullania	Frullania_mirabilis	GT	1	1
Streptophyta	Jungermanniopsida	Porellales	Frullaniaceae	Frullania	Frullania_moniliata	GT	1	7
Streptophyta	Jungermanniopsida	Porellales	Frullaniaceae	Frullania	Frullania_monocera	GT	1	1
Streptophyta	Jungermanniopsida	Porellales	Frullaniaceae	Frullania	Frullania_moritziana	GT	1	1
Streptophyta	Jungermanniopsida	Porellales	Frullaniaceae	Frullania	Frullania_multilacera	GT	1	1
Streptophyta	Jungermanniopsida	Porellales	Frullaniaceae	Frullania	Frullania_nepalensis	GT	1	3
Streptophyta	Jungermanniopsida	Porellales	Frullaniaceae	Frullania	Frullania_nicholsonii	GT	1	1
Streptophyta	Jungermanniopsida	Porellales	Frullaniaceae	Frullania	Frullania_nisquallensis	GT	1	13
Streptophyta	Jungermanniopsida	Porellales	Frullaniaceae	Frullania	Frullania_nodulosa	GT	1	3
Streptophyta	Jungermanniopsida	Porellales	Frullaniaceae	Frullania	Frullania_obscurifolia	GT	1	1
Streptophyta	Jungermanniopsida	Porellales	Frullaniaceae	Frullania	Frullania_onraedtii	GT	1	1
Streptophyta	Jungermanniopsida	Porellales	Frullaniaceae	Frullania	Frullania_orientalis	GT	1	2
Streptophyta	Jungermanniopsida	Porellales	Frullaniaceae	Frullania	Frullania_parhamii	GT	1	5
Streptophyta	Jungermanniopsida	Porellales	Frullaniaceae	Frullania	Frullania_parvistipula	GT	1	1
Streptophyta	Jungermanniopsida	Porellales	Frullaniaceae	Frullania	Frullania_patula	GT	1	1
Streptophyta	Jungermanniopsida	Porellales	Frullaniaceae	Frullania	Frullania_peruviana	GT	1	1
Streptophyta	Jungermanniopsida	Porellales	Frullaniaceae	Frullania	Frullania_pittieri	GT	1	1
Streptophyta	Jungermanniopsida	Porellales	Frullaniaceae	Frullania	Frullania_plana	GT	1	2
Streptophyta	Jungermanniopsida	Porellales	Frullaniaceae	Frullania	Frullania_pluricarinata	GT	1	1
Streptophyta	Jungermanniopsida	Porellales	Frullaniaceae	Frullania	Frullania_polysticta	GT	1	4
Streptophyta	Jungermanniopsida	Porellales	Frullaniaceae	Frullania	Frullania_pseudomeyeniana	GT	1	1
Streptophyta	Jungermanniopsida	Porellales	Frullaniaceae	Frullania	Frullania_ptychantha	GT	1	1
Streptophyta	Jungermanniopsida	Porellales	Frullaniaceae	Frullania	Frullania_purpurea	GT	1	1
Streptophyta	Jungermanniopsida	Porellales	Frullaniaceae	Frullania	Frullania_pycnantha	GT	1	1
Streptophyta	Jungermanniopsida	Porellales	Frullaniaceae	Frullania	Frullania_reflexistipula	GT	1	1
Streptophyta	Jungermanniopsida	Porellales	Frullaniaceae	Frullania	Frullania_regularis	GT	1	1
Streptophyta	Jungermanniopsida	Porellales	Frullaniaceae	Frullania	Frullania_repandistipula	GT	1	2
Streptophyta	Jungermanniopsida	Porellales	Frullaniaceae	Frullania	Frullania_reptans	GT	1	1
Streptophyta	Jungermanniopsida	Porellales	Frullaniaceae	Frullania	Frullania_ringens	GT	1	1
Streptophyta	Jungermanniopsida	Porellales	Frullaniaceae	Frullania	Frullania_riojaneirensis	GT	1	2
Streptophyta	Jungermanniopsida	Porellales	Frullaniaceae	Frullania	Frullania_riparia	GT	1	1
Streptophyta	Jungermanniopsida	Porellales	Frullaniaceae	Frullania	Frullania_rostrata	GT	1	42
Streptophyta	Jungermanniopsida	Porellales	Frullaniaceae	Frullania	Frullania_scandens	GT	1	1
Streptophyta	Jungermanniopsida	Porellales	Frullaniaceae	Frullania	Frullania_sergiae	GT	1	1
Streptophyta	Jungermanniopsida	Porellales	Frullaniaceae	Frullania	Frullania_serrata	GT	1	1
Streptophyta	Jungermanniopsida	Porellales	Frullaniaceae	Frullania	Frullania_sheana	GT	1	1
Streptophyta	Jungermanniopsida	Porellales	Frullaniaceae	Frullania	Frullania_solanderiana	GT	1	1
Streptophyta	Jungermanniopsida	Porellales	Frullaniaceae	Frullania	Frullania_sp._A_BlS-2016	GT	1	6
Streptophyta	Jungermanniopsida	Porellales	Frullaniaceae	Frullania	Frullania_sp._B_BlS-2016	GT	1	34
Streptophyta	Jungermanniopsida	Porellales	Frullaniaceae	Frullania	Frullania_sp._MG-2011a	GT	1	1
Streptophyta	Jungermanniopsida	Porellales	Frullaniaceae	Frullania	Frullania_sp._Pocs_&_Pocs_03307/A	GT	1	1
Streptophyta	Jungermanniopsida	Porellales	Frullaniaceae	Frullania	Frullania_spathulistipa	GT	1	2
Streptophyta	Jungermanniopsida	Porellales	Frullaniaceae	Frullania	Frullania_sphaerocephala	GT	1	1
Streptophyta	Jungermanniopsida	Porellales	Frullaniaceae	Frullania	Frullania_spinifera	GT	1	1
Streptophyta	Jungermanniopsida	Porellales	Frullaniaceae	Frullania	Frullania_spinigastria	GT	1	1
Streptophyta	Jungermanniopsida	Porellales	Frullaniaceae	Frullania	Frullania_squarrosula	GT	1	1
Streptophyta	Jungermanniopsida	Porellales	Frullaniaceae	Frullania	Frullania_subincumbens	GT	1	1
Streptophyta	Jungermanniopsida	Porellales	Frullaniaceae	Frullania	Frullania_subrostrata	GT	1	1
Streptophyta	Jungermanniopsida	Porellales	Frullaniaceae	Frullania	Frullania_tamarisci	GT	1	13
Streptophyta	Jungermanniopsida	Porellales	Frullaniaceae	Frullania	Frullania_taradakensis	GT	1	1
Streptophyta	Jungermanniopsida	Porellales	Frullaniaceae	Frullania	Frullania_teneriffae	GT	1	5
Streptophyta	Jungermanniopsida	Porellales	Frullaniaceae	Frullania	Frullania_tetraptera	GT	1	1
Streptophyta	Jungermanniopsida	Porellales	Frullaniaceae	Frullania	Frullania_toropuku	GT	1	3
Streptophyta	Jungermanniopsida	Porellales	Frullaniaceae	Frullania	Frullania_trinervis	GT	1	1
Streptophyta	Jungermanniopsida	Porellales	Frullaniaceae	Frullania	Frullania_truncatistyla	GT	1	2
Streptophyta	Jungermanniopsida	Porellales	Frullaniaceae	Frullania	Frullania_usambarana	GT	1	1
Streptophyta	Jungermanniopsida	Porellales	Frullaniaceae	Frullania	Frullania_usamiensis	GT	1	1
Streptophyta	Jungermanniopsida	Porellales	Frullaniaceae	Frullania	Frullania_virginica	GT	1	2
Streptophyta	Jungermanniopsida	Porellales	Frullaniaceae	Frullania	Frullania_vitalii	GT	1	1
Streptophyta	Jungermanniopsida	Porellales	Frullaniaceae	Frullania	Frullania_vittiana	GT	1	1
Streptophyta	Jungermanniopsida	Porellales	Jubulaceae	Neohattoria	Neohattoria_herzogii	GT	1	1
Streptophyta	Jungermanniopsida	Porellales	Lejeuneaceae	Acrolejeunea	Acrolejeunea_infuscata	GT	1	1
Streptophyta	Jungermanniopsida	Porellales	Lejeuneaceae	Acrolejeunea	Acrolejeunea_sandvicensis	GT	1	1
Streptophyta	Jungermanniopsida	Porellales	Lejeuneaceae	Acrolejeunea	Acrolejeunea_sinensis	GT	1	1
Streptophyta	Jungermanniopsida	Porellales	Lejeuneaceae	Allorgella	Allorgella_semperiana	GT	1	2
Streptophyta	Jungermanniopsida	Porellales	Lejeuneaceae	Aureolejeunea	Aureolejeunea_aurifera	GT	1	1
Streptophyta	Jungermanniopsida	Porellales	Lejeuneaceae	Aureolejeunea	Aureolejeunea_paramicola	GT	1	1
Streptophyta	Jungermanniopsida	Porellales	Lejeuneaceae	Aureolejeunea	Aureolejeunea_quinquecarinata	GT	1	1
Streptophyta	Jungermanniopsida	Porellales	Lejeuneaceae	Aureolejeunea	Aureolejeunea_tonduzana	GT	1	1
Streptophyta	Jungermanniopsida	Porellales	Lejeuneaceae	Brachiolejeunea	Brachiolejeunea_laxifolia	GT	1	1
Streptophyta	Jungermanniopsida	Porellales	Lejeuneaceae	Bromeliophila	Bromeliophila_natans	GT	1	2
Streptophyta	Jungermanniopsida	Porellales	Lejeuneaceae	Cheilolejeunea	Cheilolejeunea_acutangula	GT	1	1
Streptophyta	Jungermanniopsida	Porellales	Lejeuneaceae	Cheilolejeunea	Cheilolejeunea_adnata	GT	1	1
Streptophyta	Jungermanniopsida	Porellales	Lejeuneaceae	Cheilolejeunea	Cheilolejeunea_chenii	GT	1	1
Streptophyta	Jungermanniopsida	Porellales	Lejeuneaceae	Cheilolejeunea	Cheilolejeunea_clausa	GT	1	1
Streptophyta	Jungermanniopsida	Porellales	Lejeuneaceae	Cheilolejeunea	Cheilolejeunea_clypeata	GT	1	2
Streptophyta	Jungermanniopsida	Porellales	Lejeuneaceae	Cheilolejeunea	Cheilolejeunea_cordigera	GT	1	1
Streptophyta	Jungermanniopsida	Porellales	Lejeuneaceae	Cheilolejeunea	Cheilolejeunea_ecarinata	GT	1	1
Streptophyta	Jungermanniopsida	Porellales	Lejeuneaceae	Cheilolejeunea	Cheilolejeunea_falsinervis	GT	1	1
Streptophyta	Jungermanniopsida	Porellales	Lejeuneaceae	Cheilolejeunea	Cheilolejeunea_gaoi	GT	1	2
Streptophyta	Jungermanniopsida	Porellales	Lejeuneaceae	Cheilolejeunea	Cheilolejeunea_inflexa	GT	1	1
Streptophyta	Jungermanniopsida	Porellales	Lejeuneaceae	Cheilolejeunea	Cheilolejeunea_insecta	GT	1	1
Streptophyta	Jungermanniopsida	Porellales	Lejeuneaceae	Cheilolejeunea	Cheilolejeunea_intertexta	GT	1	1
Streptophyta	Jungermanniopsida	Porellales	Lejeuneaceae	Cheilolejeunea	Cheilolejeunea_krakakammae	GT	1	1
Streptophyta	Jungermanniopsida	Porellales	Lejeuneaceae	Cheilolejeunea	Cheilolejeunea_laevicalyx	AT	0.5	1	1
Streptophyta	Jungermanniopsida	Porellales	Lejeuneaceae	Cheilolejeunea	Cheilolejeunea_laeviuscula	GT	1	1
Streptophyta	Jungermanniopsida	Porellales	Lejeuneaceae	Cheilolejeunea	Cheilolejeunea_larsenii	GT	1	1
Streptophyta	Jungermanniopsida	Porellales	Lejeuneaceae	Cheilolejeunea	Cheilolejeunea_meyeniana	GT	1	1
Streptophyta	Jungermanniopsida	Porellales	Lejeuneaceae	Cheilolejeunea	Cheilolejeunea_mimosa	GT	1	1
Streptophyta	Jungermanniopsida	Porellales	Lejeuneaceae	Cheilolejeunea	Cheilolejeunea_nipponica	GT	1	1
Streptophyta	Jungermanniopsida	Porellales	Lejeuneaceae	Cheilolejeunea	Cheilolejeunea_obtusifolia	GT	1	1
Streptophyta	Jungermanniopsida	Porellales	Lejeuneaceae	Cheilolejeunea	Cheilolejeunea_occlusa	GT	1	1
Streptophyta	Jungermanniopsida	Porellales	Lejeuneaceae	Cheilolejeunea	Cheilolejeunea_oncophylla	GT	1	1
Streptophyta	Jungermanniopsida	Porellales	Lejeuneaceae	Cheilolejeunea	Cheilolejeunea_osumiensis	GT	1	1
Streptophyta	Jungermanniopsida	Porellales	Lejeuneaceae	Cheilolejeunea	Cheilolejeunea_pluriplicata	GT	1	1
Streptophyta	Jungermanniopsida	Porellales	Lejeuneaceae	Cheilolejeunea	Cheilolejeunea_rigidula	GT	1	1
Streptophyta	Jungermanniopsida	Porellales	Lejeuneaceae	Cheilolejeunea	Cheilolejeunea_ryukyuensis	GT	1	1
Streptophyta	Jungermanniopsida	Porellales	Lejeuneaceae	Cheilolejeunea	Cheilolejeunea_sp._Schaefer-Verwimp_&_Verwimp_24032	GT	1	1
Streptophyta	Jungermanniopsida	Porellales	Lejeuneaceae	Cheilolejeunea	Cheilolejeunea_streimannii	GT	1	1
Streptophyta	Jungermanniopsida	Porellales	Lejeuneaceae	Cheilolejeunea	Cheilolejeunea_subopaca	GT	1	1
Streptophyta	Jungermanniopsida	Porellales	Lejeuneaceae	Cheilolejeunea	Cheilolejeunea_surrepens	GT	1	1
Streptophyta	Jungermanniopsida	Porellales	Lejeuneaceae	Cheilolejeunea	Cheilolejeunea_trapezia	GT	1	3
Streptophyta	Jungermanniopsida	Porellales	Lejeuneaceae	Cheilolejeunea	Cheilolejeunea_trifaria	GT	1	2
Streptophyta	Jungermanniopsida	Porellales	Lejeuneaceae	Cheilolejeunea	Cheilolejeunea_vittata	GT	1	1
Streptophyta	Jungermanniopsida	Porellales	Lejeuneaceae	Colura	Colura_acroloba	GT	1	1
Streptophyta	Jungermanniopsida	Porellales	Lejeuneaceae	Colura	Colura_calyptrifolia	GT	1	1
Streptophyta	Jungermanniopsida	Porellales	Lejeuneaceae	Colura	Colura_cylindrica	GT	1	2
Streptophyta	Jungermanniopsida	Porellales	Lejeuneaceae	Colura	Colura_imperfecta	GT	1	1
Streptophyta	Jungermanniopsida	Porellales	Lejeuneaceae	Colura	Colura_ornithocephala	GT	1	2
Streptophyta	Jungermanniopsida	Porellales	Lejeuneaceae	Colura	Colura_tenuicornis	GT	1	1
Streptophyta	Jungermanniopsida	Porellales	Lejeuneaceae	Colura	Colura_tortifolia	GT	1	1
Streptophyta	Jungermanniopsida	Porellales	Lejeuneaceae	Cyclolejeunea	Cyclolejeunea_accedens	GT	1	3
Streptophyta	Jungermanniopsida	Porellales	Lejeuneaceae	Cyclolejeunea	Cyclolejeunea_chitonia	GT	1	3
Streptophyta	Jungermanniopsida	Porellales	Lejeuneaceae	Cyclolejeunea	Cyclolejeunea_convexistipa	GT	1	7
Streptophyta	Jungermanniopsida	Porellales	Lejeuneaceae	Cyclolejeunea	Cyclolejeunea_foliorum	GT	1	2
Streptophyta	Jungermanniopsida	Porellales	Lejeuneaceae	Cyclolejeunea	Cyclolejeunea_luteola	GT	1	3
Streptophyta	Jungermanniopsida	Porellales	Lejeuneaceae	Cyclolejeunea	Cyclolejeunea_peruviana	GT	1	6
Streptophyta	Jungermanniopsida	Porellales	Lejeuneaceae	Diplasiolejeunea	Diplasiolejeunea_alata	GT	1	3
Streptophyta	Jungermanniopsida	Porellales	Lejeuneaceae	Diplasiolejeunea	Diplasiolejeunea_andringitrae	GT	1	1
Streptophyta	Jungermanniopsida	Porellales	Lejeuneaceae	Diplasiolejeunea	Diplasiolejeunea_armatiloba	GT	1	1
Streptophyta	Jungermanniopsida	Porellales	Lejeuneaceae	Diplasiolejeunea	Diplasiolejeunea_borhidiana	GT	1	1
Streptophyta	Jungermanniopsida	Porellales	Lejeuneaceae	Diplasiolejeunea	Diplasiolejeunea_brunnea	GT	1	6
Streptophyta	Jungermanniopsida	Porellales	Lejeuneaceae	Diplasiolejeunea	Diplasiolejeunea_caribea	GT	1	4
Streptophyta	Jungermanniopsida	Porellales	Lejeuneaceae	Diplasiolejeunea	Diplasiolejeunea_cavifolia	GT	1	18
Streptophyta	Jungermanniopsida	Porellales	Lejeuneaceae	Diplasiolejeunea	Diplasiolejeunea_cobrensis	GT	1	1
Streptophyta	Jungermanniopsida	Porellales	Lejeuneaceae	Diplasiolejeunea	Diplasiolejeunea_cornuta	GT	1	2
Streptophyta	Jungermanniopsida	Porellales	Lejeuneaceae	Diplasiolejeunea	Diplasiolejeunea_cubensis	GT	1	2
Streptophyta	Jungermanniopsida	Porellales	Lejeuneaceae	Diplasiolejeunea	Diplasiolejeunea_eggersii	GT	1	2
Streptophyta	Jungermanniopsida	Porellales	Lejeuneaceae	Diplasiolejeunea	Diplasiolejeunea_erostrata	GT	1	2
Streptophyta	Jungermanniopsida	Porellales	Lejeuneaceae	Diplasiolejeunea	Diplasiolejeunea_ingekarolae	GT	1	1
Streptophyta	Jungermanniopsida	Porellales	Lejeuneaceae	Diplasiolejeunea	Diplasiolejeunea_involuta	GT	1	6
Streptophyta	Jungermanniopsida	Porellales	Lejeuneaceae	Diplasiolejeunea	Diplasiolejeunea_johnsonii	GT	1	2
Streptophyta	Jungermanniopsida	Porellales	Lejeuneaceae	Diplasiolejeunea	Diplasiolejeunea_jovet-astiae	GT	1	1
Streptophyta	Jungermanniopsida	Porellales	Lejeuneaceae	Diplasiolejeunea	Diplasiolejeunea_kraussiana	GT	1	1
Streptophyta	Jungermanniopsida	Porellales	Lejeuneaceae	Diplasiolejeunea	Diplasiolejeunea_leiocarpa	GT	1	2
Streptophyta	Jungermanniopsida	Porellales	Lejeuneaceae	Diplasiolejeunea	Diplasiolejeunea_malleiformis	GT	1	5
Streptophyta	Jungermanniopsida	Porellales	Lejeuneaceae	Diplasiolejeunea	Diplasiolejeunea_ornata	GT	1	1
Streptophyta	Jungermanniopsida	Porellales	Lejeuneaceae	Diplasiolejeunea	Diplasiolejeunea_papilionacea	GT	1	1
Streptophyta	Jungermanniopsida	Porellales	Lejeuneaceae	Diplasiolejeunea	Diplasiolejeunea_patelligera	GT	1	1
Streptophyta	Jungermanniopsida	Porellales	Lejeuneaceae	Diplasiolejeunea	Diplasiolejeunea_pauckertii	GT	1	9
Streptophyta	Jungermanniopsida	Porellales	Lejeuneaceae	Diplasiolejeunea	Diplasiolejeunea_pellucida	GT	1	6
Streptophyta	Jungermanniopsida	Porellales	Lejeuneaceae	Diplasiolejeunea	Diplasiolejeunea_plicatiloba	GT	1	1
Streptophyta	Jungermanniopsida	Porellales	Lejeuneaceae	Diplasiolejeunea	Diplasiolejeunea_pluridentata	GT	1	3
Streptophyta	Jungermanniopsida	Porellales	Lejeuneaceae	Diplasiolejeunea	Diplasiolejeunea_pocsii	GT	1	2
Streptophyta	Jungermanniopsida	Porellales	Lejeuneaceae	Diplasiolejeunea	Diplasiolejeunea_ranomafanae	GT	1	1
Streptophyta	Jungermanniopsida	Porellales	Lejeuneaceae	Diplasiolejeunea	Diplasiolejeunea_replicata	GT	1	6
Streptophyta	Jungermanniopsida	Porellales	Lejeuneaceae	Diplasiolejeunea	Diplasiolejeunea_rudolphiana	GT	1	5
Streptophyta	Jungermanniopsida	Porellales	Lejeuneaceae	Diplasiolejeunea	Diplasiolejeunea_sp._I_SD-2012	GT	1	1
Streptophyta	Jungermanniopsida	Porellales	Lejeuneaceae	Diplasiolejeunea	Diplasiolejeunea_sp._II_SD-2012	GT	1	1
Streptophyta	Jungermanniopsida	Porellales	Lejeuneaceae	Diplasiolejeunea	Diplasiolejeunea_sp._III_SD-2012	GT	1	1
Streptophyta	Jungermanniopsida	Porellales	Lejeuneaceae	Diplasiolejeunea	Diplasiolejeunea_sp._V_SD-2012	GT	1	1
Streptophyta	Jungermanniopsida	Porellales	Lejeuneaceae	Diplasiolejeunea	Diplasiolejeunea_unidentata	GT	1	1
Streptophyta	Jungermanniopsida	Porellales	Lejeuneaceae	Diplasiolejeunea	Diplasiolejeunea_villaumei	GT	1	3
Streptophyta	Jungermanniopsida	Porellales	Lejeuneaceae	Diplasiolejeunea	Diplasiolejeunea_zakiae	GT	1	5
Streptophyta	Jungermanniopsida	Porellales	Lejeuneaceae	Drepanolejeunea	Drepanolejeunea_anoplantha	GT	1	1
Streptophyta	Jungermanniopsida	Porellales	Lejeuneaceae	Drepanolejeunea	Drepanolejeunea_granatensis	GT	1	1
Streptophyta	Jungermanniopsida	Porellales	Lejeuneaceae	Drepanolejeunea	Drepanolejeunea_hamatifolia	GT	1	1
Streptophyta	Jungermanniopsida	Porellales	Lejeuneaceae	Drepanolejeunea	Drepanolejeunea_inchoata	GT	1	1
Streptophyta	Jungermanniopsida	Porellales	Lejeuneaceae	Drepanolejeunea	Drepanolejeunea_mosenii	GT	1	1
Streptophyta	Jungermanniopsida	Porellales	Lejeuneaceae	Drepanolejeunea	Drepanolejeunea_navicularis	GT	1	1
Streptophyta	Jungermanniopsida	Porellales	Lejeuneaceae	Drepanolejeunea	Drepanolejeunea_vandenberghenii	GT	1	2
Streptophyta	Jungermanniopsida	Porellales	Lejeuneaceae	Drepanolejeunea	Drepanolejeunea_vesiculosa	GT	1	5
Streptophyta	Jungermanniopsida	Porellales	Lejeuneaceae	Echinolejeunea	Echinolejeunea_papillata	GT	1	1
Streptophyta	Jungermanniopsida	Porellales	Lejeuneaceae	Evansiolejeunea	Evansiolejeunea_roccatii	GT	1	1
Streptophyta	Jungermanniopsida	Porellales	Lejeuneaceae	Haplolejeunea	Haplolejeunea_cucullata	GT	1	2
Streptophyta	Jungermanniopsida	Porellales	Lejeuneaceae	Haplolejeunea	Haplolejeunea_sticta	GT	1	1
Streptophyta	Jungermanniopsida	Porellales	Lejeuneaceae	Harpalejeunea	Harpalejeunea_filicuspis	GT	1	3
Streptophyta	Jungermanniopsida	Porellales	Lejeuneaceae	Harpalejeunea	Harpalejeunea_fischeri	GT	1	4
Streptophyta	Jungermanniopsida	Porellales	Lejeuneaceae	Harpalejeunea	Harpalejeunea_grandis	GT	1	1
Streptophyta	Jungermanniopsida	Porellales	Lejeuneaceae	Harpalejeunea	Harpalejeunea_grandistipula	GT	1	1
Streptophyta	Jungermanniopsida	Porellales	Lejeuneaceae	Harpalejeunea	Harpalejeunea_latitans	GT	1	1
Streptophyta	Jungermanniopsida	Porellales	Lejeuneaceae	Harpalejeunea	Harpalejeunea_marginalis	GT	1	2
Streptophyta	Jungermanniopsida	Porellales	Lejeuneaceae	Harpalejeunea	Harpalejeunea_molleri	GT	1	2
Streptophyta	Jungermanniopsida	Porellales	Lejeuneaceae	Harpalejeunea	Harpalejeunea_reflexula	GT	1	1
Streptophyta	Jungermanniopsida	Porellales	Lejeuneaceae	Harpalejeunea	Harpalejeunea_stricta	GT	1	1
Streptophyta	Jungermanniopsida	Porellales	Lejeuneaceae	Harpalejeunea	Harpalejeunea_uncinata	GT	1	1
Streptophyta	Jungermanniopsida	Porellales	Lejeuneaceae	Lejeunea	Lejeunea_acuta	GT	1	2
Streptophyta	Jungermanniopsida	Porellales	Lejeuneaceae	Lejeunea	Lejeunea_adpressa	GT	1	2
Streptophyta	Jungermanniopsida	Porellales	Lejeuneaceae	Lejeunea	Lejeunea_alata	GT	1	1
Streptophyta	Jungermanniopsida	Porellales	Lejeuneaceae	Lejeunea	Lejeunea_amaniensis	GT	1	3
Streptophyta	Jungermanniopsida	Porellales	Lejeuneaceae	Lejeunea	Lejeunea_anisophylla	GT	1	10
Streptophyta	Jungermanniopsida	Porellales	Lejeuneaceae	Lejeunea	Lejeunea_apiculata	GT	1	1
Streptophyta	Jungermanniopsida	Porellales	Lejeuneaceae	Lejeunea	Lejeunea_asperrima	GT	1	1
Streptophyta	Jungermanniopsida	Porellales	Lejeuneaceae	Lejeunea	Lejeunea_asperula	GT	1	1
Streptophyta	Jungermanniopsida	Porellales	Lejeuneaceae	Lejeunea	Lejeunea_bermudiana	GT	1	1
Streptophyta	Jungermanniopsida	Porellales	Lejeuneaceae	Lejeunea	Lejeunea_bidentula	GT	1	1
Streptophyta	Jungermanniopsida	Porellales	Lejeuneaceae	Lejeunea	Lejeunea_boryana	GT	1	1
Streptophyta	Jungermanniopsida	Porellales	Lejeuneaceae	Lejeunea	Lejeunea_cancellata	GT	1	4
Streptophyta	Jungermanniopsida	Porellales	Lejeuneaceae	Lejeunea	Lejeunea_capensis	GT	1	1
Streptophyta	Jungermanniopsida	Porellales	Lejeuneaceae	Lejeunea	Lejeunea_catinulifera	GT	1	2
Streptophyta	Jungermanniopsida	Porellales	Lejeuneaceae	Lejeunea	Lejeunea_cavifolia	GT	1	6
Streptophyta	Jungermanniopsida	Porellales	Lejeuneaceae	Lejeunea	Lejeunea_cerina	GT	1	5
Streptophyta	Jungermanniopsida	Porellales	Lejeuneaceae	Lejeunea	Lejeunea_cf._curviloba_SD-2013	GT	1	1
Streptophyta	Jungermanniopsida	Porellales	Lejeuneaceae	Lejeunea	Lejeunea_cocoes	GT	1	2
Streptophyta	Jungermanniopsida	Porellales	Lejeuneaceae	Lejeunea	Lejeunea_controversa	GT	1	4
Streptophyta	Jungermanniopsida	Porellales	Lejeuneaceae	Lejeunea	Lejeunea_cuculliflora	GT	1	3
Streptophyta	Jungermanniopsida	Porellales	Lejeuneaceae	Lejeunea	Lejeunea_curviloba	GT	1	1
Streptophyta	Jungermanniopsida	Porellales	Lejeuneaceae	Lejeunea	Lejeunea_debilis	GT	1	3
Streptophyta	Jungermanniopsida	Porellales	Lejeuneaceae	Lejeunea	Lejeunea_deplanata	GT	1	5
Streptophyta	Jungermanniopsida	Porellales	Lejeuneaceae	Lejeunea	Lejeunea_discreta	GT	1	2
Streptophyta	Jungermanniopsida	Porellales	Lejeuneaceae	Lejeunea	Lejeunea_drehwaldii	GT	1	1
Streptophyta	Jungermanniopsida	Porellales	Lejeuneaceae	Lejeunea	Lejeunea_drummondii	AT	1		1
Streptophyta	Jungermanniopsida	Porellales	Lejeuneaceae	Lejeunea	Lejeunea_eckloniana	GT	1	3
Streptophyta	Jungermanniopsida	Porellales	Lejeuneaceae	Lejeunea	Lejeunea_exilis	GT	1	3
Streptophyta	Jungermanniopsida	Porellales	Lejeuneaceae	Lejeunea	Lejeunea_flava	GT	1	35
Streptophyta	Jungermanniopsida	Porellales	Lejeuneaceae	Lejeunea	Lejeunea_grossitexta	GT	1	4
Streptophyta	Jungermanniopsida	Porellales	Lejeuneaceae	Lejeunea	Lejeunea_hibernica	GT	1	1
Streptophyta	Jungermanniopsida	Porellales	Lejeuneaceae	Lejeunea	Lejeunea_intricata	GT	1	1
Streptophyta	Jungermanniopsida	Porellales	Lejeuneaceae	Lejeunea	Lejeunea_isocalycina	GT	1	3
Streptophyta	Jungermanniopsida	Porellales	Lejeuneaceae	Lejeunea	Lejeunea_japonica	GT	1	3
Streptophyta	Jungermanniopsida	Porellales	Lejeuneaceae	Lejeunea	Lejeunea_laeta	GT	1	1
Streptophyta	Jungermanniopsida	Porellales	Lejeuneaceae	Lejeunea	Lejeunea_laetevirens	GT	1	11
Streptophyta	Jungermanniopsida	Porellales	Lejeuneaceae	Lejeunea	Lejeunea_lamacerina	GT	1	8
Streptophyta	Jungermanniopsida	Porellales	Lejeuneaceae	Lejeunea	Lejeunea_lomana	GT	1	2
Streptophyta	Jungermanniopsida	Porellales	Lejeuneaceae	Lejeunea	Lejeunea_micholitzii	GT	1	3
Streptophyta	Jungermanniopsida	Porellales	Lejeuneaceae	Lejeunea	Lejeunea_microloba	GT	1	2
Streptophyta	Jungermanniopsida	Porellales	Lejeuneaceae	Lejeunea	Lejeunea_mimula	GT	1	3
Streptophyta	Jungermanniopsida	Porellales	Lejeuneaceae	Lejeunea	Lejeunea_minutiloba	GT	1	1
Streptophyta	Jungermanniopsida	Porellales	Lejeuneaceae	Lejeunea	Lejeunea_monimiae	GT	1	1
Streptophyta	Jungermanniopsida	Porellales	Lejeuneaceae	Lejeunea	Lejeunea_multidentata	GT	1	2
Streptophyta	Jungermanniopsida	Porellales	Lejeuneaceae	Lejeunea	Lejeunea_neelgherriana	GT	1	1
Streptophyta	Jungermanniopsida	Porellales	Lejeuneaceae	Lejeunea	Lejeunea_nepalensis	GT	1	1
Streptophyta	Jungermanniopsida	Porellales	Lejeuneaceae	Lejeunea	Lejeunea_obscura	GT	1	2
Streptophyta	Jungermanniopsida	Porellales	Lejeuneaceae	Lejeunea	Lejeunea_obtusangula	GT	1	2
Streptophyta	Jungermanniopsida	Porellales	Lejeuneaceae	Lejeunea	Lejeunea_oligoclada	GT	1	1
Streptophyta	Jungermanniopsida	Porellales	Lejeuneaceae	Lejeunea	Lejeunea_osculatiana	GT	1	3
Streptophyta	Jungermanniopsida	Porellales	Lejeuneaceae	Lejeunea	Lejeunea_pallescens	GT	1	2
Streptophyta	Jungermanniopsida	Porellales	Lejeuneaceae	Lejeunea	Lejeunea_parva	GT	1	3
Streptophyta	Jungermanniopsida	Porellales	Lejeuneaceae	Lejeunea	Lejeunea_patriciae	GT	1	1
Streptophyta	Jungermanniopsida	Porellales	Lejeuneaceae	Lejeunea	Lejeunea_paucidentata	GT	1	1
Streptophyta	Jungermanniopsida	Porellales	Lejeuneaceae	Lejeunea	Lejeunea_phyllobola	GT	1	2
Streptophyta	Jungermanniopsida	Porellales	Lejeuneaceae	Lejeunea	Lejeunea_pterigonia	GT	1	4
Streptophyta	Jungermanniopsida	Porellales	Lejeuneaceae	Lejeunea	Lejeunea_puiggariana	GT	1	2
Streptophyta	Jungermanniopsida	Porellales	Lejeuneaceae	Lejeunea	Lejeunea_pulchriflora	GT	1	5
Streptophyta	Jungermanniopsida	Porellales	Lejeuneaceae	Lejeunea	Lejeunea_pulverulenta	GT	1	1
Streptophyta	Jungermanniopsida	Porellales	Lejeuneaceae	Lejeunea	Lejeunea_ramosissima	GT	1	3
Streptophyta	Jungermanniopsida	Porellales	Lejeuneaceae	Lejeunea	Lejeunea_ramulosa	GT	1	3
Streptophyta	Jungermanniopsida	Porellales	Lejeuneaceae	Lejeunea	Lejeunea_reflexistipula	GT	1	7
Streptophyta	Jungermanniopsida	Porellales	Lejeuneaceae	Lejeunea	Lejeunea_rotundifolia	GT	1	1
Streptophyta	Jungermanniopsida	Porellales	Lejeuneaceae	Lejeunea	Lejeunea_ruthii	GT	1	2
Streptophyta	Jungermanniopsida	Porellales	Lejeuneaceae	Lejeunea	Lejeunea_sordida	GT	1	6
Streptophyta	Jungermanniopsida	Porellales	Lejeuneaceae	Lejeunea	Lejeunea_sp._Gradstein_10369	GT	1	1
Streptophyta	Jungermanniopsida	Porellales	Lejeuneaceae	Lejeunea	Lejeunea_sp._I_SD-2013	GT	1	1
Streptophyta	Jungermanniopsida	Porellales	Lejeuneaceae	Lejeunea	Lejeunea_sp._II_SD-2013	GT	1	1
Streptophyta	Jungermanniopsida	Porellales	Lejeuneaceae	Lejeunea	Lejeunea_sp._III_SD-2013	GT	1	1
Streptophyta	Jungermanniopsida	Porellales	Lejeuneaceae	Lejeunea	Lejeunea_sp._IV_SD-2013	GT	1	1
Streptophyta	Jungermanniopsida	Porellales	Lejeuneaceae	Lejeunea	Lejeunea_sp._IX_SD-2013	GT	1	1
Streptophyta	Jungermanniopsida	Porellales	Lejeuneaceae	Lejeunea	Lejeunea_sp._Pocs_&_Szabo_9218/FC	GT	1	1
Streptophyta	Jungermanniopsida	Porellales	Lejeuneaceae	Lejeunea	Lejeunea_sp._VII_SD-2013	GT	1	1
Streptophyta	Jungermanniopsida	Porellales	Lejeuneaceae	Lejeunea	Lejeunea_sp._VIII_SD-2013	GT	1	1
Streptophyta	Jungermanniopsida	Porellales	Lejeuneaceae	Lejeunea	Lejeunea_sp._X_SD-2013	GT	1	1
Streptophyta	Jungermanniopsida	Porellales	Lejeuneaceae	Lejeunea	Lejeunea_sporadica	GT	1	1
Streptophyta	Jungermanniopsida	Porellales	Lejeuneaceae	Lejeunea	Lejeunea_subspathulata	GT	1	2
Streptophyta	Jungermanniopsida	Porellales	Lejeuneaceae	Lejeunea	Lejeunea_tapajosensis	GT	1	1
Streptophyta	Jungermanniopsida	Porellales	Lejeuneaceae	Lejeunea	Lejeunea_topoensis	GT	1	2
Streptophyta	Jungermanniopsida	Porellales	Lejeuneaceae	Lejeunea	Lejeunea_trinitensis	GT	1	3
Streptophyta	Jungermanniopsida	Porellales	Lejeuneaceae	Lejeunea	Lejeunea_tuberculosa	GT	1	3
Streptophyta	Jungermanniopsida	Porellales	Lejeuneaceae	Lejeunea	Lejeunea_ulicina	GT	1	1
Streptophyta	Jungermanniopsida	Porellales	Lejeuneaceae	Lejeunea	Lejeunea_umbilicata	GT	1	3
Streptophyta	Jungermanniopsida	Porellales	Lejeuneaceae	Lepidolejeunea	Lepidolejeunea_delessertii	GT	1	1
Streptophyta	Jungermanniopsida	Porellales	Lejeuneaceae	Leptolejeunea	Leptolejeunea_amphiophthalma	GT	1	1
Streptophyta	Jungermanniopsida	Porellales	Lejeuneaceae	Leptolejeunea	Leptolejeunea_astroidea	GT	1	1
Streptophyta	Jungermanniopsida	Porellales	Lejeuneaceae	Leptolejeunea	Leptolejeunea_brasiliensis	GT	1	3
Streptophyta	Jungermanniopsida	Porellales	Lejeuneaceae	Leptolejeunea	Leptolejeunea_cf._subacuta_JB237	GT	1	1
Streptophyta	Jungermanniopsida	Porellales	Lejeuneaceae	Leptolejeunea	Leptolejeunea_convexistipa	GT	1	3
Streptophyta	Jungermanniopsida	Porellales	Lejeuneaceae	Leptolejeunea	Leptolejeunea_dapitana	GT	1	2
Streptophyta	Jungermanniopsida	Porellales	Lejeuneaceae	Leptolejeunea	Leptolejeunea_elliptica	GT	1	1
Streptophyta	Jungermanniopsida	Porellales	Lejeuneaceae	Leptolejeunea	Leptolejeunea_epiphylla	GT	1	4
Streptophyta	Jungermanniopsida	Porellales	Lejeuneaceae	Leptolejeunea	Leptolejeunea_exocellata	GT	1	4
Streptophyta	Jungermanniopsida	Porellales	Lejeuneaceae	Leptolejeunea	Leptolejeunea_foliicola	GT	1	1
Streptophyta	Jungermanniopsida	Porellales	Lejeuneaceae	Leptolejeunea	Leptolejeunea_moniliata	GT	1	1
Streptophyta	Jungermanniopsida	Porellales	Lejeuneaceae	Leptolejeunea	Leptolejeunea_radicosa	GT	1	4
Streptophyta	Jungermanniopsida	Porellales	Lejeuneaceae	Leptolejeunea	Leptolejeunea_schiffneri	GT	1	2
Streptophyta	Jungermanniopsida	Porellales	Lejeuneaceae	Leptolejeunea	Leptolejeunea_sp._JB156	GT	1	1
Streptophyta	Jungermanniopsida	Porellales	Lejeuneaceae	Leptolejeunea	Leptolejeunea_subacuta	GT	1	2
Streptophyta	Jungermanniopsida	Porellales	Lejeuneaceae	Leucolejeunea	Leucolejeunea_conchifolia	GT	1	2
Streptophyta	Jungermanniopsida	Porellales	Lejeuneaceae	Leucolejeunea	Leucolejeunea_turgida	GT	1	1
Streptophyta	Jungermanniopsida	Porellales	Lejeuneaceae	Leucolejeunea	Leucolejeunea_unciloba	GT	1	1
Streptophyta	Jungermanniopsida	Porellales	Lejeuneaceae	Leucolejeunea	Leucolejeunea_xanthocarpa	GT	1	2
Streptophyta	Jungermanniopsida	Porellales	Lejeuneaceae	Marchesinia	Marchesinia_bongardiana	GT	1	4
Streptophyta	Jungermanniopsida	Porellales	Lejeuneaceae	Marchesinia	Marchesinia_brachiata	GT	1	6
Streptophyta	Jungermanniopsida	Porellales	Lejeuneaceae	Marchesinia	Marchesinia_languida	GT	1	3
Streptophyta	Jungermanniopsida	Porellales	Lejeuneaceae	Marchesinia	Marchesinia_mackaii	GT	1	4
Streptophyta	Jungermanniopsida	Porellales	Lejeuneaceae	Marchesinia	Marchesinia_madagasa	GT	1	1
Streptophyta	Jungermanniopsida	Porellales	Lejeuneaceae	Marchesinia	Marchesinia_robusta	GT	1	6
Streptophyta	Jungermanniopsida	Porellales	Lejeuneaceae	Metalejeunea	Metalejeunea_crassitexta	GT	1	2
Streptophyta	Jungermanniopsida	Porellales	Lejeuneaceae	Metalejeunea	Metalejeunea_cucullata	GT	1	4
Streptophyta	Jungermanniopsida	Porellales	Lejeuneaceae	Microlejeunea	Microlejeunea_africana	GT	1	3
Streptophyta	Jungermanniopsida	Porellales	Lejeuneaceae	Microlejeunea	Microlejeunea_ankasica	GT	1	1
Streptophyta	Jungermanniopsida	Porellales	Lejeuneaceae	Microlejeunea	Microlejeunea_bullata	GT	1	1
Streptophyta	Jungermanniopsida	Porellales	Lejeuneaceae	Microlejeunea	Microlejeunea_capillaris	GT	1	1
Streptophyta	Jungermanniopsida	Porellales	Lejeuneaceae	Microlejeunea	Microlejeunea_colombiana	GT	1	1
Streptophyta	Jungermanniopsida	Porellales	Lejeuneaceae	Microlejeunea	Microlejeunea_cystifera	GT	1	1
Streptophyta	Jungermanniopsida	Porellales	Lejeuneaceae	Microlejeunea	Microlejeunea_globosa	GT	1	1
Streptophyta	Jungermanniopsida	Porellales	Lejeuneaceae	Microlejeunea	Microlejeunea_kamerunensis	GT	1	1
Streptophyta	Jungermanniopsida	Porellales	Lejeuneaceae	Microlejeunea	Microlejeunea_nyandaruensis	GT	1	1
Streptophyta	Jungermanniopsida	Porellales	Lejeuneaceae	Microlejeunea	Microlejeunea_punctiformis	GT	1	1
Streptophyta	Jungermanniopsida	Porellales	Lejeuneaceae	Microlejeunea	Microlejeunea_sp._SD-2013	GT	1	1
Streptophyta	Jungermanniopsida	Porellales	Lejeuneaceae	Omphalanthus	Omphalanthus_filiformis	GT	1	2
Streptophyta	Jungermanniopsida	Porellales	Lejeuneaceae	Omphalanthus	Omphalanthus_ovalis	GT	1	2
Streptophyta	Jungermanniopsida	Porellales	Lejeuneaceae	Oryzolejeunea	Oryzolejeunea_saccatiloba	GT	1	1
Streptophyta	Jungermanniopsida	Porellales	Lejeuneaceae	Otolejeunea	Otolejeunea_moniliata	GT	1	2
Streptophyta	Jungermanniopsida	Porellales	Lejeuneaceae	Pictolejeunea	Pictolejeunea_picta	GT	1	2
Streptophyta	Jungermanniopsida	Porellales	Lejeuneaceae	Pluvianthus	Pluvianthus_squarrosus	GT	1	2
Streptophyta	Jungermanniopsida	Porellales	Lejeuneaceae	Prionolejeunea	Prionolejeunea_grata	GT	1	1
Streptophyta	Jungermanniopsida	Porellales	Lejeuneaceae	Prionolejeunea	Prionolejeunea_schlimiana	GT	1	1
Streptophyta	Jungermanniopsida	Porellales	Lejeuneaceae	Prionolejeunea	Prionolejeunea_trachyodes	GT	1	1
Streptophyta	Jungermanniopsida	Porellales	Lejeuneaceae	Ptychanthus	Ptychanthus_striatus	GT	1	1
Streptophyta	Jungermanniopsida	Porellales	Lejeuneaceae	Rectolejeunea	Rectolejeunea_flagelliformis	GT	1	1
Streptophyta	Jungermanniopsida	Porellales	Lejeuneaceae	Tuzibeanthus	Tuzibeanthus_chinensis	GT	1	1
Streptophyta	Jungermanniopsida	Porellales	Lejeuneaceae	Vitalianthus	Vitalianthus_aphanellus	GT	1	1
Streptophyta	Jungermanniopsida	Porellales	Lejeuneaceae	Vitalianthus	Vitalianthus_bischlerianus	GT	1	2
Streptophyta	Jungermanniopsida	Porellales	Lejeuneaceae	Xylolejeunea	Xylolejeunea_grolleana	GT	1	1
Streptophyta	Jungermanniopsida	Porellales	Porellaceae	Ascidiota	Ascidiota_blepharophylla	GT	1	1
Streptophyta	Jungermanniopsida	Porellales	Porellaceae	Porella	Porella_cordaeana	GT	1	5
Streptophyta	Jungermanniopsida	Porellales	Porellaceae	Porella	Porella_obtusata	GT	1	2
Streptophyta	Jungermanniopsida	Porellales	Porellaceae	Porella	Porella_pinnata	GT	1	1
Streptophyta	Jungermanniopsida	Porellales	Porellaceae	Porella	Porella_platyphylla	GT	1	2
Streptophyta	Jungermanniopsida	Porellales	Porellaceae	Porella	Porella_platyphylloidea	GT	1	13
Streptophyta	Jungermanniopsida	Porellales	Porellaceae	Porella	Porella_roellii	GT	1	2
Streptophyta	Klebsormidiophyceae	Klebsormidiales	Klebsormidiaceae	Interfilum	Interfilum_massjukiae	AT	1		1
Streptophyta	Klebsormidiophyceae	Klebsormidiales	Klebsormidiaceae	Interfilum	Interfilum_paradoxum	AT	1		2
Streptophyta	Klebsormidiophyceae	Klebsormidiales	Klebsormidiaceae	Interfilum	Interfilum_sp._SAG_2100	AT	1		2
Streptophyta	Klebsormidiophyceae	Klebsormidiales	Klebsormidiaceae	Interfilum	Interfilum_sp._SAG_2101	AT	1		2
Streptophyta	Klebsormidiophyceae	Klebsormidiales	Klebsormidiaceae	Interfilum	Interfilum_sp._SAG_2147	AT	1		1
Streptophyta	Klebsormidiophyceae	Klebsormidiales	Klebsormidiaceae	Interfilum	Interfilum_sp._SAG_36.88	AT	1		1
Streptophyta	Klebsormidiophyceae	Klebsormidiales	Klebsormidiaceae	Klebsormidium	Klebsormidium_crenulatum	AT	1		1
Streptophyta	Klebsormidiophyceae	Klebsormidiales	Klebsormidiaceae	Klebsormidium	Klebsormidium_elegans	AT	1		1
Streptophyta	Klebsormidiophyceae	Klebsormidiales	Klebsormidiaceae	Klebsormidium	Klebsormidium_flaccidum	AT	0.8		4	1
Streptophyta	Klebsormidiophyceae	Klebsormidiales	Klebsormidiaceae	Klebsormidium	Klebsormidium_fluitans	AT	1		1
Streptophyta	Klebsormidiophyceae	Klebsormidiales	Klebsormidiaceae	Klebsormidium	Klebsormidium_mucosum	AT	1		1
Streptophyta	Klebsormidiophyceae	Klebsormidiales	Klebsormidiaceae	Klebsormidium	Klebsormidium_nitens	AT	1		1
Streptophyta	Klebsormidiophyceae	Klebsormidiales	Klebsormidiaceae	Klebsormidium	Klebsormidium_sp._837I	AT	1		1
Streptophyta	Klebsormidiophyceae	Klebsormidiales	Klebsormidiaceae	Klebsormidium	Klebsormidium_sp._SAG_2065	AT	1		1
Streptophyta	Klebsormidiophyceae	Klebsormidiales	Klebsormidiaceae	Klebsormidium	Klebsormidium_subtilissimum	AT	1		2
Streptophyta	Klebsormidiophyceae	Klebsormidiales	Klebsormidiales_Incertae_sedis	Hormidiella	Hormidiella_attenuata	AT	1		1
Streptophyta	Liliopsida	Acorales	Acoraceae	Acorus	Acorus_americanus	Other	1					1
Streptophyta	Liliopsida	Acorales	Acoraceae	Acorus	Acorus_calamus	GT	1	3
Streptophyta	Liliopsida	Acorales	Acoraceae	Acorus	Acorus_gramineus	GT	1	3
Streptophyta	Liliopsida	Acorales	Acoraceae	Acorus	Acorus_latifolius	GT	1	1
Streptophyta	Liliopsida	Acorales	Acoraceae	Acorus	Acorus_macrospadiceus	GT	1	1
Streptophyta	Liliopsida	Acorales	Acoraceae	Acorus	Acorus_sp._'Mt._Emei'	GT	1	1
Streptophyta	Liliopsida	Acorales	Acoraceae	Acorus	Acorus_tatarinowii	GT	1	3
Streptophyta	Liliopsida	Acorales	Acoraceae	Acorus	Acorus_xiangyeus	GT	1	1
Streptophyta	Liliopsida	Alismatales	Alismataceae	Alisma	Alisma_gramineum	GT	1	1
Streptophyta	Liliopsida	Alismatales	Alismataceae	Alisma	Alisma_lanceolatum	GT	1	2
Streptophyta	Liliopsida	Alismatales	Alismataceae	Alisma	Alisma_plantago-aquatica	GT	1	4
Streptophyta	Liliopsida	Alismatales	Alismataceae	Caldesia	Caldesia_parnassifolia	GT	1	1
Streptophyta	Liliopsida	Alismatales	Alismataceae	Luronium	Luronium_natans	GT	1	1
Streptophyta	Liliopsida	Alismatales	Araceae	Adelonema	Adelonema_crinipes	GT	1	1
Streptophyta	Liliopsida	Alismatales	Araceae	Adelonema	Adelonema_hammelii	GT	1	1
Streptophyta	Liliopsida	Alismatales	Araceae	Adelonema	Adelonema_panamense	GT	1	1
Streptophyta	Liliopsida	Alismatales	Araceae	Adelonema	Adelonema_peltatum	GT	1	2
Streptophyta	Liliopsida	Alismatales	Araceae	Adelonema	Adelonema_picturatum	AG	1							1
Streptophyta	Liliopsida	Alismatales	Araceae	Adelonema	Adelonema_sp._SEL_1992-0029	GT	1	1
Streptophyta	Liliopsida	Alismatales	Araceae	Adelonema	Adelonema_speariae	GT	1	1
Streptophyta	Liliopsida	Alismatales	Araceae	Adelonema	Adelonema_wendlandii	GT	1	3
Streptophyta	Liliopsida	Alismatales	Araceae	Homalomena	Homalomena_pygmaea	GC	1				1
Streptophyta	Liliopsida	Alismatales	Araceae	Landoltia	Landoltia_punctata	GT	1	2
Streptophyta	Liliopsida	Alismatales	Araceae	Lemna	Lemna_disperma	GT	1	1
Streptophyta	Liliopsida	Alismatales	Araceae	Lemna	Lemna_ecuadoriensis	GT	1	2
Streptophyta	Liliopsida	Alismatales	Araceae	Lemna	Lemna_japonica	GT	1	1
Streptophyta	Liliopsida	Alismatales	Araceae	Lemna	Lemna_minor	GT	1	1
Streptophyta	Liliopsida	Alismatales	Araceae	Lemna	Lemna_minuta	GT	1	2
Streptophyta	Liliopsida	Alismatales	Araceae	Lemna	Lemna_obscura	GT	1	1
Streptophyta	Liliopsida	Alismatales	Araceae	Lemna	Lemna_tenera	GT	1	1
Streptophyta	Liliopsida	Alismatales	Araceae	Lemna	Lemna_turionifera	GT	1	1
Streptophyta	Liliopsida	Alismatales	Araceae	Lemna	Lemna_valdiviana	GT	1	1
Streptophyta	Liliopsida	Alismatales	Araceae	Lemna	Lemna_yungensis	GT	1	1
Streptophyta	Liliopsida	Alismatales	Araceae	Wolffia	Wolffia_angusta	GT	1	1
Streptophyta	Liliopsida	Alismatales	Araceae	Wolffia	Wolffia_borealis	GT	1	1
Streptophyta	Liliopsida	Alismatales	Araceae	Wolffia	Wolffia_brasiliensis	GT	1	2
Streptophyta	Liliopsida	Alismatales	Araceae	Wolffia	Wolffia_columbiana	GT	1	2
Streptophyta	Liliopsida	Alismatales	Araceae	Wolffia	Wolffia_cylindracea	GT	1	1
Streptophyta	Liliopsida	Alismatales	Araceae	Wolffia	Wolffia_globosa	GT	1	1
Streptophyta	Liliopsida	Alismatales	Araceae	Wolffia	Wolffia_microscopica	GT	1	1
Streptophyta	Liliopsida	Alismatales	Araceae	Wolffia	Wolffia_neglecta	GT	1	1
Streptophyta	Liliopsida	Alismatales	Araceae	Wolffiella	Wolffiella_denticulata	GT	1	1
Streptophyta	Liliopsida	Alismatales	Araceae	Wolffiella	Wolffiella_hyalina	GT	1	1
Streptophyta	Liliopsida	Alismatales	Araceae	Wolffiella	Wolffiella_rotunda	GT	1	1
Streptophyta	Liliopsida	Alismatales	Hydrocharitaceae	Egeria	Egeria_densa	GT	1	1
Streptophyta	Liliopsida	Alismatales	Hydrocharitaceae	Egeria	Egeria_najas	AT	1		1
Streptophyta	Liliopsida	Alismatales	Hydrocharitaceae	Elodea	Elodea_nuttallii	GT	1	5
Streptophyta	Liliopsida	Alismatales	Hydrocharitaceae	Najas	Najas_flexilis	GT	1	1
Streptophyta	Liliopsida	Alismatales	Hydrocharitaceae	Najas	Najas_guadalupensis	GT	1	1
Streptophyta	Liliopsida	Alismatales	Hydrocharitaceae	Najas	Najas_minor	GT	1	1
Streptophyta	Liliopsida	Alismatales	Hydrocharitaceae	Vallisneria	Vallisneria_americana	GT	1	1
Streptophyta	Liliopsida	Alismatales	Potamogetonaceae	Groenlandia	Groenlandia_densa	GT	1	1
Streptophyta	Liliopsida	Alismatales	Potamogetonaceae	Potamogeton	Potamogeton_amplifolius	GT	1	2
Streptophyta	Liliopsida	Alismatales	Potamogetonaceae	Potamogeton	Potamogeton_berchtoldii	GT	1	2
Streptophyta	Liliopsida	Alismatales	Potamogetonaceae	Potamogeton	Potamogeton_bicupulatus	GT	1	2
Streptophyta	Liliopsida	Alismatales	Potamogetonaceae	Potamogeton	Potamogeton_coloratus	GT	1	1
Streptophyta	Liliopsida	Alismatales	Potamogetonaceae	Potamogeton	Potamogeton_compressus	GT	1	2
Streptophyta	Liliopsida	Alismatales	Potamogetonaceae	Potamogeton	Potamogeton_crispus	GT	1	6
Streptophyta	Liliopsida	Alismatales	Potamogetonaceae	Potamogeton	Potamogeton_gramineus	GT	1	1
Streptophyta	Liliopsida	Alismatales	Potamogetonaceae	Potamogeton	Potamogeton_natans	GT	1	2
Streptophyta	Liliopsida	Alismatales	Potamogetonaceae	Potamogeton	Potamogeton_obtusifolius	GT	1	1
Streptophyta	Liliopsida	Alismatales	Potamogetonaceae	Potamogeton	Potamogeton_praelongus	GT	1	2
Streptophyta	Liliopsida	Alismatales	Potamogetonaceae	Potamogeton	Potamogeton_pulcher	GT	1	1
Streptophyta	Liliopsida	Alismatales	Potamogetonaceae	Potamogeton	Potamogeton_pusillus	GT	1	4
Streptophyta	Liliopsida	Alismatales	Potamogetonaceae	Potamogeton	Potamogeton_robbinsii	GT	1	1
Streptophyta	Liliopsida	Alismatales	Potamogetonaceae	Potamogeton	Potamogeton_rutilus	GT	1	3
Streptophyta	Liliopsida	Alismatales	Potamogetonaceae	Potamogeton	Potamogeton_spirillus	GT	1	1
Streptophyta	Liliopsida	Alismatales	Potamogetonaceae	Potamogeton	Potamogeton_zosteriformis	GT	1	1
Streptophyta	Liliopsida	Alismatales	Potamogetonaceae	Stuckenia	Stuckenia_pectinata	GT	1	4
Streptophyta	Liliopsida	Alismatales	Potamogetonaceae	Zannichellia	Zannichellia_palustris	AT	1		1
Streptophyta	Liliopsida	Alismatales	Tofieldiaceae	Pleea	Pleea_tenuifolia	GT	1	1
Streptophyta	Liliopsida	Alismatales	Tofieldiaceae	Tofieldia	Tofieldia_pusilla	GT	1	6
Streptophyta	Liliopsida	Alismatales	Tofieldiaceae	Triantha	Triantha_racemosa	GT	1	1
Streptophyta	Liliopsida	Arecales	Arecaceae	Actinorhytis	Actinorhytis_calapparia	GC	1				1
Streptophyta	Liliopsida	Arecales	Arecaceae	Adonidia	Adonidia_maturbongsii	GC	1				1
Streptophyta	Liliopsida	Arecales	Arecaceae	Adonidia	Adonidia_merrillii	GC	1				1
Streptophyta	Liliopsida	Arecales	Arecaceae	Archontophoenix	Archontophoenix_alexandrae	GC	1				1
Streptophyta	Liliopsida	Arecales	Arecaceae	Archontophoenix	Archontophoenix_cunninghamiana	GC	1				1
Streptophyta	Liliopsida	Arecales	Arecaceae	Archontophoenix	Archontophoenix_myolensis	GC	1				1
Streptophyta	Liliopsida	Arecales	Arecaceae	Archontophoenix	Archontophoenix_tuckeri	GC	1				1
Streptophyta	Liliopsida	Arecales	Arecaceae	Arecaceae_Incertae_sedis	Arecaceae_sp._SN-2014	GC	1				1
Streptophyta	Liliopsida	Arecales	Arecaceae	Arenga	Arenga_brevipes	GC	1				2
Streptophyta	Liliopsida	Arecales	Arecaceae	Arenga	Arenga_caudata	GC	1				9
Streptophyta	Liliopsida	Arecales	Arecaceae	Arenga	Arenga_engleri	GC	1				4
Streptophyta	Liliopsida	Arecales	Arecaceae	Arenga	Arenga_hastata	GC	1				1
Streptophyta	Liliopsida	Arecales	Arecaceae	Arenga	Arenga_hookeriana	GC	1				4
Streptophyta	Liliopsida	Arecales	Arecaceae	Arenga	Arenga_listeri	GC	1				1
Streptophyta	Liliopsida	Arecales	Arecaceae	Arenga	Arenga_longicarpa	GC	1				1
Streptophyta	Liliopsida	Arecales	Arecaceae	Arenga	Arenga_obtusifolia	GC	1				2
Streptophyta	Liliopsida	Arecales	Arecaceae	Arenga	Arenga_pinnata	GC	1				2
Streptophyta	Liliopsida	Arecales	Arecaceae	Arenga	Arenga_porphyrocarpa	GC	1				1
Streptophyta	Liliopsida	Arecales	Arecaceae	Arenga	Arenga_retroflorescens	GC	1				1
Streptophyta	Liliopsida	Arecales	Arecaceae	Arenga	Arenga_ryukyuensis	GC	1				2
Streptophyta	Liliopsida	Arecales	Arecaceae	Arenga	Arenga_tremula	GC	1				1
Streptophyta	Liliopsida	Arecales	Arecaceae	Arenga	Arenga_undulatifolia	GC	1				2
Streptophyta	Liliopsida	Arecales	Arecaceae	Arenga	Arenga_westerhoutii	GC	1				1
Streptophyta	Liliopsida	Arecales	Arecaceae	Balaka	Balaka_diffusa	GC	1				1
Streptophyta	Liliopsida	Arecales	Arecaceae	Balaka	Balaka_longirostris	GC	1				1
Streptophyta	Liliopsida	Arecales	Arecaceae	Balaka	Balaka_macrocarpa	GC	1				1
Streptophyta	Liliopsida	Arecales	Arecaceae	Balaka	Balaka_seemannii	GC	1				1
Streptophyta	Liliopsida	Arecales	Arecaceae	Balaka	Balaka_tahitensis	GC	1				1
Streptophyta	Liliopsida	Arecales	Arecaceae	Basselinia	Basselinia_humboldtiana	GC	1				1
Streptophyta	Liliopsida	Arecales	Arecaceae	Basselinia	Basselinia_velutina	GC	1				1
Streptophyta	Liliopsida	Arecales	Arecaceae	Brassiophoenix	Brassiophoenix_drymophloeoides	GC	1				1
Streptophyta	Liliopsida	Arecales	Arecaceae	Brassiophoenix	Brassiophoenix_schumannii	GC	1				1
Streptophyta	Liliopsida	Arecales	Arecaceae	Calamus	Calamus_acanthospathus	GC	1				2
Streptophyta	Liliopsida	Arecales	Arecaceae	Calamus	Calamus_andamanicus	GC	1				2
Streptophyta	Liliopsida	Arecales	Arecaceae	Calamus	Calamus_arborescens	GC	1				2
Streptophyta	Liliopsida	Arecales	Arecaceae	Calamus	Calamus_baratangensis	GC	1				4
Streptophyta	Liliopsida	Arecales	Arecaceae	Calamus	Calamus_basui	GC	1				3
Streptophyta	Liliopsida	Arecales	Arecaceae	Calamus	Calamus_brandisii	GC	1				3
Streptophyta	Liliopsida	Arecales	Arecaceae	Calamus	Calamus_caesius	GC	1				3
Streptophyta	Liliopsida	Arecales	Arecaceae	Calamus	Calamus_delessertianus	GC	1				1
Streptophyta	Liliopsida	Arecales	Arecaceae	Calamus	Calamus_dilaceratus	GC	1				2
Streptophyta	Liliopsida	Arecales	Arecaceae	Calamus	Calamus_dransfieldii	GC	1				1
Streptophyta	Liliopsida	Arecales	Arecaceae	Calamus	Calamus_erectus	GC	1				3
Streptophyta	Liliopsida	Arecales	Arecaceae	Calamus	Calamus_flagellum	GC	1				2
Streptophyta	Liliopsida	Arecales	Arecaceae	Calamus	Calamus_floribundus	GC	1				5
Streptophyta	Liliopsida	Arecales	Arecaceae	Calamus	Calamus_gamblei	GC	1				2
Streptophyta	Liliopsida	Arecales	Arecaceae	Calamus	Calamus_gracilis	GC	1				3
Streptophyta	Liliopsida	Arecales	Arecaceae	Calamus	Calamus_huegelianus	GC	1				2
Streptophyta	Liliopsida	Arecales	Arecaceae	Calamus	Calamus_karnatakensis	GC	1				3
Streptophyta	Liliopsida	Arecales	Arecaceae	Calamus	Calamus_khasianus	GC	1				1
Streptophyta	Liliopsida	Arecales	Arecaceae	Calamus	Calamus_laccifer	GC	1				2
Streptophyta	Liliopsida	Arecales	Arecaceae	Calamus	Calamus_lakshmanae	GC	1				4
Streptophyta	Liliopsida	Arecales	Arecaceae	Calamus	Calamus_leptospadix	GC	1				5
Streptophyta	Liliopsida	Arecales	Arecaceae	Calamus	Calamus_longisetus	GC	1				2
Streptophyta	Liliopsida	Arecales	Arecaceae	Calamus	Calamus_metzianus	GC	1				2
Streptophyta	Liliopsida	Arecales	Arecaceae	Calamus	Calamus_nagbettai	GC	1				1
Streptophyta	Liliopsida	Arecales	Arecaceae	Calamus	Calamus_nambariensis	GC	1				2
Streptophyta	Liliopsida	Arecales	Arecaceae	Calamus	Calamus_neelagiricus	GC	1				2
Streptophyta	Liliopsida	Arecales	Arecaceae	Calamus	Calamus_palustris	GC	1				1
Streptophyta	Liliopsida	Arecales	Arecaceae	Calamus	Calamus_prasinus	GC	1				2
Streptophyta	Liliopsida	Arecales	Arecaceae	Calamus	Calamus_pseudorivalis	GC	1				3
Streptophyta	Liliopsida	Arecales	Arecaceae	Calamus	Calamus_pseudotenuis	GC	1				1
Streptophyta	Liliopsida	Arecales	Arecaceae	Calamus	Calamus_rotang	GC	1				2
Streptophyta	Liliopsida	Arecales	Arecaceae	Calamus	Calamus_shendurunii	GC	1				1
Streptophyta	Liliopsida	Arecales	Arecaceae	Calamus	Calamus_stoloniferus	GC	1				5
Streptophyta	Liliopsida	Arecales	Arecaceae	Calamus	Calamus_tenuis	GC	1				2
Streptophyta	Liliopsida	Arecales	Arecaceae	Calamus	Calamus_thwaitesii	GC	1				2
Streptophyta	Liliopsida	Arecales	Arecaceae	Calamus	Calamus_unifarius	GC	1				3
Streptophyta	Liliopsida	Arecales	Arecaceae	Calamus	Calamus_vattayila	GC	1				3
Streptophyta	Liliopsida	Arecales	Arecaceae	Calamus	Calamus_viminalis	GC	1				9
Streptophyta	Liliopsida	Arecales	Arecaceae	Calyptrocalyx	Calyptrocalyx_awa	GC	1				1
Streptophyta	Liliopsida	Arecales	Arecaceae	Carpentaria	Carpentaria_acuminata	GC	1				2
Streptophyta	Liliopsida	Arecales	Arecaceae	Carpoxylon	Carpoxylon_macrospermum	GC	1				1
Streptophyta	Liliopsida	Arecales	Arecaceae	Caryota	Caryota_no	GC	1				2
Streptophyta	Liliopsida	Arecales	Arecaceae	Caryota	Caryota_ophiopellis	GC	1				1
Streptophyta	Liliopsida	Arecales	Arecaceae	Chambeyronia	Chambeyronia_lepidota	GC	1				1
Streptophyta	Liliopsida	Arecales	Arecaceae	Daemonorops	Daemonorops_aurea	GC	1				4
Streptophyta	Liliopsida	Arecales	Arecaceae	Daemonorops	Daemonorops_jenkinsiana	GC	1				3
Streptophyta	Liliopsida	Arecales	Arecaceae	Daemonorops	Daemonorops_kurziana	GC	1				3
Streptophyta	Liliopsida	Arecales	Arecaceae	Daemonorops	Daemonorops_manii	GC	1				3
Streptophyta	Liliopsida	Arecales	Arecaceae	Daemonorops	Daemonorops_rarispinosa	GC	1				2
Streptophyta	Liliopsida	Arecales	Arecaceae	Daemonorops	Daemonorops_wrightmyoensis	GC	1				1
Streptophyta	Liliopsida	Arecales	Arecaceae	Drymophloeus	Drymophloeus_litigiosus	GC	1				1
Streptophyta	Liliopsida	Arecales	Arecaceae	Drymophloeus	Drymophloeus_oliviformis	GC	1				1
Streptophyta	Liliopsida	Arecales	Arecaceae	Howea	Howea_belmoreana	GC	1				1
Streptophyta	Liliopsida	Arecales	Arecaceae	Kentiopsis	Kentiopsis_magnifica	GC	1				1
Streptophyta	Liliopsida	Arecales	Arecaceae	Kentiopsis	Kentiopsis_piersoniorum	GC	1				1
Streptophyta	Liliopsida	Arecales	Arecaceae	Korthalsia	Korthalsia_laciniosa	GC	1				2
Streptophyta	Liliopsida	Arecales	Arecaceae	Korthalsia	Korthalsia_rogersii	GC	1				5
Streptophyta	Liliopsida	Arecales	Arecaceae	Linospadix	Linospadix_monostachyos	GC	1				1
Streptophyta	Liliopsida	Arecales	Arecaceae	Normanbya	Normanbya_normanbyi	GC	1				1
Streptophyta	Liliopsida	Arecales	Arecaceae	Plectocomia	Plectocomia_himalayana	GC	1				2
Streptophyta	Liliopsida	Arecales	Arecaceae	Ponapea	Ponapea_ledermanniana	GC	1				1
Streptophyta	Liliopsida	Arecales	Arecaceae	Ptychococcus	Ptychococcus_lepidotus	GC	1				1
Streptophyta	Liliopsida	Arecales	Arecaceae	Ptychococcus	Ptychococcus_paradoxus	GC	1				1
Streptophyta	Liliopsida	Arecales	Arecaceae	Ptychosperma	Ptychosperma_burretianum	GC	1				1
Streptophyta	Liliopsida	Arecales	Arecaceae	Ptychosperma	Ptychosperma_furcatum	GC	1				1
Streptophyta	Liliopsida	Arecales	Arecaceae	Ptychosperma	Ptychosperma_gracile	GC	1				1
Streptophyta	Liliopsida	Arecales	Arecaceae	Ptychosperma	Ptychosperma_lauterbachii	GC	1				1
Streptophyta	Liliopsida	Arecales	Arecaceae	Ptychosperma	Ptychosperma_lineare	GC	1				1
Streptophyta	Liliopsida	Arecales	Arecaceae	Ptychosperma	Ptychosperma_macarthurii	GC	1				1
Streptophyta	Liliopsida	Arecales	Arecaceae	Ptychosperma	Ptychosperma_nicolai	GC	1				1
Streptophyta	Liliopsida	Arecales	Arecaceae	Ptychosperma	Ptychosperma_propinquum	GC	1				1
Streptophyta	Liliopsida	Arecales	Arecaceae	Ptychosperma	Ptychosperma_pullenii	GC	1				1
Streptophyta	Liliopsida	Arecales	Arecaceae	Ptychosperma	Ptychosperma_salomonense	GC	1				1
Streptophyta	Liliopsida	Arecales	Arecaceae	Ptychosperma	Ptychosperma_sanderianum	GC	1				1
Streptophyta	Liliopsida	Arecales	Arecaceae	Ptychosperma	Ptychosperma_schefferii	GC	1				1
Streptophyta	Liliopsida	Arecales	Arecaceae	Ptychosperma	Ptychosperma_sp._SN-2014	GC	1				1
Streptophyta	Liliopsida	Arecales	Arecaceae	Rhopalostylis	Rhopalostylis_baueri	GC	1				1
Streptophyta	Liliopsida	Arecales	Arecaceae	Sabal	Sabal_bermudana	GC	1				1
Streptophyta	Liliopsida	Arecales	Arecaceae	Sabal	Sabal_causiarum	GC	1				1
Streptophyta	Liliopsida	Arecales	Arecaceae	Sabal	Sabal_gretherae	GC	1				1
Streptophyta	Liliopsida	Arecales	Arecaceae	Sabal	Sabal_miamiensis	GC	1				1
Streptophyta	Liliopsida	Arecales	Arecaceae	Solfia	Solfia_samoensis	GC	1				1
Streptophyta	Liliopsida	Arecales	Arecaceae	Veitchia	Veitchia_arecina	GC	1				1
Streptophyta	Liliopsida	Arecales	Arecaceae	Veitchia	Veitchia_filifera	GC	1				1
Streptophyta	Liliopsida	Arecales	Arecaceae	Veitchia	Veitchia_joannis	GC	1				1
Streptophyta	Liliopsida	Arecales	Arecaceae	Veitchia	Veitchia_metiti	GC	1				1
Streptophyta	Liliopsida	Arecales	Arecaceae	Veitchia	Veitchia_pachyclada	GC	1				1
Streptophyta	Liliopsida	Arecales	Arecaceae	Veitchia	Veitchia_spiralis	GC	1				1
Streptophyta	Liliopsida	Arecales	Arecaceae	Veitchia	Veitchia_subdisticha	GC	1				1
Streptophyta	Liliopsida	Arecales	Arecaceae	Veitchia	Veitchia_winin	GC	1				1
Streptophyta	Liliopsida	Arecales	Arecaceae	Wallichia	Wallichia_disticha	GC	1				2
Streptophyta	Liliopsida	Arecales	Arecaceae	Wallichia	Wallichia_gracilis	GC	1				3
Streptophyta	Liliopsida	Arecales	Arecaceae	Wallichia	Wallichia_marianneae	GC	1				1
Streptophyta	Liliopsida	Arecales	Arecaceae	Wallichia	Wallichia_oblongifolia	GC	1				1
Streptophyta	Liliopsida	Arecales	Arecaceae	Wodyetia	Wodyetia_bifurcata	GC	1				1
Streptophyta	Liliopsida	Asparagales	Amaryllidaceae	Allium	Allium_ampeloprasum	GT	1	1
Streptophyta	Liliopsida	Asparagales	Amaryllidaceae	Allium	Allium_anisopodium	GT	1	1
Streptophyta	Liliopsida	Asparagales	Amaryllidaceae	Allium	Allium_cepa	GT	1	1
Streptophyta	Liliopsida	Asparagales	Amaryllidaceae	Allium	Allium_globosum	GT	1	4
Streptophyta	Liliopsida	Asparagales	Amaryllidaceae	Allium	Allium_macrostemon	GT	1	3
Streptophyta	Liliopsida	Asparagales	Amaryllidaceae	Allium	Allium_oleraceum	GT	1	1
Streptophyta	Liliopsida	Asparagales	Amaryllidaceae	Allium	Allium_pallasii	GT	1	1
Streptophyta	Liliopsida	Asparagales	Amaryllidaceae	Allium	Allium_platyspathum	GT	1	2
Streptophyta	Liliopsida	Asparagales	Amaryllidaceae	Allium	Allium_schoenoprasum	GT	1	3
Streptophyta	Liliopsida	Asparagales	Amaryllidaceae	Allium	Allium_scorodoprasum	GT	1	1
Streptophyta	Liliopsida	Asparagales	Amaryllidaceae	Allium	Allium_semenovi	GT	1	2
Streptophyta	Liliopsida	Asparagales	Amaryllidaceae	Allium	Allium_senescens	GT	1	2
Streptophyta	Liliopsida	Asparagales	Amaryllidaceae	Allium	Allium_sphaerocephalon	GT	1	1
Streptophyta	Liliopsida	Asparagales	Amaryllidaceae	Allium	Allium_strictum	GT	1	1
Streptophyta	Liliopsida	Asparagales	Amaryllidaceae	Allium	Allium_tuberosum	GT	1	2
Streptophyta	Liliopsida	Asparagales	Amaryllidaceae	Allium	Allium_vineale	GT	1	2
Streptophyta	Liliopsida	Asparagales	Amaryllidaceae	Ammocharis	Ammocharis_baumii	GT	1	1
Streptophyta	Liliopsida	Asparagales	Amaryllidaceae	Ammocharis	Ammocharis_nerinoides	GT	1	1
Streptophyta	Liliopsida	Asparagales	Amaryllidaceae	Beauverdia	Beauverdia_dialystemon	GC	1				1
Streptophyta	Liliopsida	Asparagales	Amaryllidaceae	Crinum	Crinum_abyssinicum	GT	1	1
Streptophyta	Liliopsida	Asparagales	Amaryllidaceae	Crinum	Crinum_americanum	GT	1	2
Streptophyta	Liliopsida	Asparagales	Amaryllidaceae	Crinum	Crinum_asiaticum	GT	1	1
Streptophyta	Liliopsida	Asparagales	Amaryllidaceae	Crinum	Crinum_buphanoides	GT	1	1
Streptophyta	Liliopsida	Asparagales	Amaryllidaceae	Crinum	Crinum_carolo-schmidtii	GT	1	1
Streptophyta	Liliopsida	Asparagales	Amaryllidaceae	Crinum	Crinum_cruentum	GT	1	1
Streptophyta	Liliopsida	Asparagales	Amaryllidaceae	Crinum	Crinum_defixum	GT	1	1
Streptophyta	Liliopsida	Asparagales	Amaryllidaceae	Crinum	Crinum_distichum	GT	1	1
Streptophyta	Liliopsida	Asparagales	Amaryllidaceae	Crinum	Crinum_erubescens	GT	1	1
Streptophyta	Liliopsida	Asparagales	Amaryllidaceae	Crinum	Crinum_fimbriatulum	GT	1	1
Streptophyta	Liliopsida	Asparagales	Amaryllidaceae	Crinum	Crinum_flaccidum	GT	1	1
Streptophyta	Liliopsida	Asparagales	Amaryllidaceae	Crinum	Crinum_forbesii	GT	1	1
Streptophyta	Liliopsida	Asparagales	Amaryllidaceae	Crinum	Crinum_humile	GT	1	1
Streptophyta	Liliopsida	Asparagales	Amaryllidaceae	Crinum	Crinum_jagus	GT	1	1
Streptophyta	Liliopsida	Asparagales	Amaryllidaceae	Crinum	Crinum_latifolium	GT	1	1
Streptophyta	Liliopsida	Asparagales	Amaryllidaceae	Crinum	Crinum_ligulatum	GT	1	1
Streptophyta	Liliopsida	Asparagales	Amaryllidaceae	Crinum	Crinum_mauritianum	GT	1	1
Streptophyta	Liliopsida	Asparagales	Amaryllidaceae	Crinum	Crinum_modestum	GT	1	1
Streptophyta	Liliopsida	Asparagales	Amaryllidaceae	Crinum	Crinum_moorei	GT	1	1
Streptophyta	Liliopsida	Asparagales	Amaryllidaceae	Crinum	Crinum_oliganthum	GT	1	1
Streptophyta	Liliopsida	Asparagales	Amaryllidaceae	Crinum	Crinum_politifolium	GT	1	1
Streptophyta	Liliopsida	Asparagales	Amaryllidaceae	Crinum	Crinum_razafindratsiraea	GT	1	1
Streptophyta	Liliopsida	Asparagales	Amaryllidaceae	Crinum	Crinum_sp._Meerow_2332	GT	1	1
Streptophyta	Liliopsida	Asparagales	Amaryllidaceae	Crinum	Crinum_sp._Meerow_2333	GT	1	1
Streptophyta	Liliopsida	Asparagales	Amaryllidaceae	Crinum	Crinum_sp._Schunke_14054	GT	1	1
Streptophyta	Liliopsida	Asparagales	Amaryllidaceae	Crinum	Crinum_venosum	GT	1	1
Streptophyta	Liliopsida	Asparagales	Amaryllidaceae	Crinum	Crinum_yemense	GT	1	1
Streptophyta	Liliopsida	Asparagales	Amaryllidaceae	Gethyllis	Gethyllis_afra	GT	1	1
Streptophyta	Liliopsida	Asparagales	Amaryllidaceae	Gilliesia	Gilliesia_graminea	GC	1				1
Streptophyta	Liliopsida	Asparagales	Amaryllidaceae	Leucocoryne	Leucocoryne_coquimbensis	GC	1				1
Streptophyta	Liliopsida	Asparagales	Amaryllidaceae	Leucocoryne	Leucocoryne_incrassata	AG	1							1
Streptophyta	Liliopsida	Asparagales	Amaryllidaceae	Leucocoryne	Leucocoryne_pauciflora	GC	1				1
Streptophyta	Liliopsida	Asparagales	Amaryllidaceae	Lycoris	Lycoris_squamigera	GT	1	1
Streptophyta	Liliopsida	Asparagales	Amaryllidaceae	Narcissus	Narcissus_cavanillesii	GT	1	26
Streptophyta	Liliopsida	Asparagales	Amaryllidaceae	Narcissus	Narcissus_cf._x_perezlarae_IM-2010	GT	1	4
Streptophyta	Liliopsida	Asparagales	Amaryllidaceae	Narcissus	Narcissus_miniatus	GT	1	15
Streptophyta	Liliopsida	Asparagales	Amaryllidaceae	Narcissus	Narcissus_serotinus	GT	1	15
Streptophyta	Liliopsida	Asparagales	Amaryllidaceae	Narcissus	Narcissus_x_alentejanus	GT	1	6
Streptophyta	Liliopsida	Asparagales	Amaryllidaceae	Narcissus	Narcissus_x_perezlarae	GT	1	2
Streptophyta	Liliopsida	Asparagales	Amaryllidaceae	Nothoscordum	Nothoscordum_andicola	GC	1				1
Streptophyta	Liliopsida	Asparagales	Amaryllidaceae	Nothoscordum	Nothoscordum_bivalve	GC	1				1
Streptophyta	Liliopsida	Asparagales	Amaryllidaceae	Nothoscordum	Nothoscordum_gaudichaudianum	CT	1									1
Streptophyta	Liliopsida	Asparagales	Amaryllidaceae	Nothoscordum	Nothoscordum_inodorum	GC	1				1
Streptophyta	Liliopsida	Asparagales	Amaryllidaceae	Tristagma	Tristagma_bivalve	GC	1				1
Streptophyta	Liliopsida	Asparagales	Amaryllidaceae	Tristagma	Tristagma_cf._uniflorum_'Rolf_Fiedler'	GT	1	1
Streptophyta	Liliopsida	Asparagales	Amaryllidaceae	Tristagma	Tristagma_nivale	GC	1				1
Streptophyta	Liliopsida	Asparagales	Amaryllidaceae	Tristagma	Tristagma_sessile	GC	1				1
Streptophyta	Liliopsida	Asparagales	Amaryllidaceae	Tristagma	Tristagma_sp._Chase_296	AG	1							1
Streptophyta	Liliopsida	Asparagales	Amaryllidaceae	Tristagma	Tristagma_uniflorum	AG	1							1
Streptophyta	Liliopsida	Asparagales	Amaryllidaceae	Zephyranthes	Zephyranthes_candida	GT	1	1
Streptophyta	Liliopsida	Asparagales	Asparagaceae	Asparagus	Asparagus_officinalis	GT	1	4
Streptophyta	Liliopsida	Asparagales	Asparagaceae	Asparagus	Asparagus_racemosus	GT	1	1
Streptophyta	Liliopsida	Asparagales	Asparagaceae	Chlorophytum	Chlorophytum_attenuatum	GT	1	1
Streptophyta	Liliopsida	Asparagales	Asparagaceae	Chlorophytum	Chlorophytum_glaucum	GT	1	1
Streptophyta	Liliopsida	Asparagales	Asparagaceae	Chlorophytum	Chlorophytum_gothanense	GT	1	1
Streptophyta	Liliopsida	Asparagales	Asparagaceae	Chlorophytum	Chlorophytum_laxum	GT	1	1
Streptophyta	Liliopsida	Asparagales	Asparagaceae	Chlorophytum	Chlorophytum_malabaricum	GT	1	1
Streptophyta	Liliopsida	Asparagales	Asparagaceae	Chlorophytum	Chlorophytum_nepalense	GT	1	1
Streptophyta	Liliopsida	Asparagales	Asparagaceae	Chlorophytum	Chlorophytum_sp._1_PVT-2012	GT	1	1
Streptophyta	Liliopsida	Asparagales	Asparagaceae	Chlorophytum	Chlorophytum_tuberosum	AA	1								1
Streptophyta	Liliopsida	Asparagales	Asparagaceae	Dracaena	Dracaena_angustifolia	GC	1				2
Streptophyta	Liliopsida	Asparagales	Asparagaceae	Maianthemum	Maianthemum_bifolium	GC	1				1
Streptophyta	Liliopsida	Asparagales	Asparagaceae	Polygonatum	Polygonatum_odoratum	GT	1	1
Streptophyta	Liliopsida	Asparagales	Asphodelaceae	Asphodelus	Asphodelus_tenuifolius	GC	1				3
Streptophyta	Liliopsida	Asparagales	Asphodelaceae	Bulbine	Bulbine_latifolia	GC	1				1
Streptophyta	Liliopsida	Asparagales	Asphodelaceae	Bulbinella	Bulbinella_cauda-felis	GT	1	1
Streptophyta	Liliopsida	Asparagales	Asphodelaceae	Kniphofia	Kniphofia_acraea	GT	1	1
Streptophyta	Liliopsida	Asparagales	Asphodelaceae	Kniphofia	Kniphofia_albescens	GT	1	1
Streptophyta	Liliopsida	Asparagales	Asphodelaceae	Kniphofia	Kniphofia_albomontana	GT	1	1
Streptophyta	Liliopsida	Asparagales	Asphodelaceae	Kniphofia	Kniphofia_angustifolia	GT	1	1
Streptophyta	Liliopsida	Asparagales	Asphodelaceae	Kniphofia	Kniphofia_ankaratrensis	GT	1	1
Streptophyta	Liliopsida	Asparagales	Asphodelaceae	Kniphofia	Kniphofia_baurii	GT	1	5
Streptophyta	Liliopsida	Asparagales	Asphodelaceae	Kniphofia	Kniphofia_brachystachya	GT	1	1
Streptophyta	Liliopsida	Asparagales	Asphodelaceae	Kniphofia	Kniphofia_breviflora	GT	1	1
Streptophyta	Liliopsida	Asparagales	Asphodelaceae	Kniphofia	Kniphofia_bruceae	GT	1	1
Streptophyta	Liliopsida	Asparagales	Asphodelaceae	Kniphofia	Kniphofia_buchananii	GT	1	1
Streptophyta	Liliopsida	Asparagales	Asphodelaceae	Kniphofia	Kniphofia_caulescens	GT	1	3
Streptophyta	Liliopsida	Asparagales	Asphodelaceae	Kniphofia	Kniphofia_citrina	GT	1	1
Streptophyta	Liliopsida	Asparagales	Asphodelaceae	Kniphofia	Kniphofia_coddiana	GT	1	1
Streptophyta	Liliopsida	Asparagales	Asphodelaceae	Kniphofia	Kniphofia_coralligemma	GT	1	1
Streptophyta	Liliopsida	Asparagales	Asphodelaceae	Kniphofia	Kniphofia_drepanophylla	GT	1	1
Streptophyta	Liliopsida	Asparagales	Asphodelaceae	Kniphofia	Kniphofia_ensifolia	GT	1	2
Streptophyta	Liliopsida	Asparagales	Asphodelaceae	Kniphofia	Kniphofia_evansii	GT	1	1
Streptophyta	Liliopsida	Asparagales	Asphodelaceae	Kniphofia	Kniphofia_fibrosa	GT	1	1
Streptophyta	Liliopsida	Asparagales	Asphodelaceae	Kniphofia	Kniphofia_fluviatilis	GT	1	1
Streptophyta	Liliopsida	Asparagales	Asphodelaceae	Kniphofia	Kniphofia_foliosa	GT	1	6
Streptophyta	Liliopsida	Asparagales	Asphodelaceae	Kniphofia	Kniphofia_galpinii	GT	1	1
Streptophyta	Liliopsida	Asparagales	Asphodelaceae	Kniphofia	Kniphofia_gracilis	GT	1	2
Streptophyta	Liliopsida	Asparagales	Asphodelaceae	Kniphofia	Kniphofia_grantii	GT	1	1
Streptophyta	Liliopsida	Asparagales	Asphodelaceae	Kniphofia	Kniphofia_hirsuta	GT	1	1
Streptophyta	Liliopsida	Asparagales	Asphodelaceae	Kniphofia	Kniphofia_ichopensis	GT	1	3
Streptophyta	Liliopsida	Asparagales	Asphodelaceae	Kniphofia	Kniphofia_insignis	GT	1	1
Streptophyta	Liliopsida	Asparagales	Asphodelaceae	Kniphofia	Kniphofia_isoetifolia	GT	1	3
Streptophyta	Liliopsida	Asparagales	Asphodelaceae	Kniphofia	Kniphofia_latifolia	GT	1	1
Streptophyta	Liliopsida	Asparagales	Asphodelaceae	Kniphofia	Kniphofia_laxiflora	GT	1	6
Streptophyta	Liliopsida	Asparagales	Asphodelaceae	Kniphofia	Kniphofia_leucocephala	GT	1	1
Streptophyta	Liliopsida	Asparagales	Asphodelaceae	Kniphofia	Kniphofia_linearifolia	GT	1	8
Streptophyta	Liliopsida	Asparagales	Asphodelaceae	Kniphofia	Kniphofia_littoralis	GT	1	1
Streptophyta	Liliopsida	Asparagales	Asphodelaceae	Kniphofia	Kniphofia_multiflora	GT	1	2
Streptophyta	Liliopsida	Asparagales	Asphodelaceae	Kniphofia	Kniphofia_northiae	GT	1	2
Streptophyta	Liliopsida	Asparagales	Asphodelaceae	Kniphofia	Kniphofia_parviflora	GT	1	2
Streptophyta	Liliopsida	Asparagales	Asphodelaceae	Kniphofia	Kniphofia_pauciflora	GT	1	1
Streptophyta	Liliopsida	Asparagales	Asphodelaceae	Kniphofia	Kniphofia_porphyrantha	GT	1	1
Streptophyta	Liliopsida	Asparagales	Asphodelaceae	Kniphofia	Kniphofia_praecox	GT	1	1
Streptophyta	Liliopsida	Asparagales	Asphodelaceae	Kniphofia	Kniphofia_rigidifolia	GT	1	1
Streptophyta	Liliopsida	Asparagales	Asphodelaceae	Kniphofia	Kniphofia_ritualis	GT	1	1
Streptophyta	Liliopsida	Asparagales	Asphodelaceae	Kniphofia	Kniphofia_rooperi	GT	1	2
Streptophyta	Liliopsida	Asparagales	Asphodelaceae	Kniphofia	Kniphofia_sarmentosa	GT	1	1
Streptophyta	Liliopsida	Asparagales	Asphodelaceae	Kniphofia	Kniphofia_schimperi	GT	1	2
Streptophyta	Liliopsida	Asparagales	Asphodelaceae	Kniphofia	Kniphofia_splendida	GT	1	1
Streptophyta	Liliopsida	Asparagales	Asphodelaceae	Kniphofia	Kniphofia_stricta	GT	1	1
Streptophyta	Liliopsida	Asparagales	Asphodelaceae	Kniphofia	Kniphofia_thodei	GT	1	1
Streptophyta	Liliopsida	Asparagales	Asphodelaceae	Kniphofia	Kniphofia_thomsonii	GT	1	3
Streptophyta	Liliopsida	Asparagales	Asphodelaceae	Kniphofia	Kniphofia_triangularis	GT	1	4
Streptophyta	Liliopsida	Asparagales	Asphodelaceae	Kniphofia	Kniphofia_typhoides	GT	1	2
Streptophyta	Liliopsida	Asparagales	Asphodelaceae	Kniphofia	Kniphofia_tysonii	GT	1	2
Streptophyta	Liliopsida	Asparagales	Asphodelaceae	Kniphofia	Kniphofia_umbrina	GT	1	1
Streptophyta	Liliopsida	Asparagales	Asphodelaceae	Kniphofia	Kniphofia_uvaria	GT	1	7
Streptophyta	Liliopsida	Asparagales	Hyacinthaceae	Bellevalia	Bellevalia_saviczii	GC	1				1
Streptophyta	Liliopsida	Asparagales	Hyacinthaceae	Dipcadi	Dipcadi_erythraeum	GT	1	2
Streptophyta	Liliopsida	Asparagales	Iridaceae	Crocus	Crocus_sativus	GT	0.857143	12	2
Streptophyta	Liliopsida	Asparagales	Iridaceae	Iris	Iris_ensata	GT	1	1
Streptophyta	Liliopsida	Asparagales	Iridaceae	Iris	Iris_hookeri	GT	1	1
Streptophyta	Liliopsida	Asparagales	Iridaceae	Iris	Iris_lactea	AT	1		2
Streptophyta	Liliopsida	Asparagales	Iridaceae	Iris	Iris_loczyi	GT	1	1
Streptophyta	Liliopsida	Asparagales	Iridaceae	Iris	Iris_prismatica	GT	1	1
Streptophyta	Liliopsida	Asparagales	Iridaceae	Iris	Iris_ruthenica	GT	1	1
Streptophyta	Liliopsida	Asparagales	Iridaceae	Iris	Iris_scariosa	GT	1	1
Streptophyta	Liliopsida	Asparagales	Iridaceae	Iris	Iris_setosa	GT	1	2
Streptophyta	Liliopsida	Asparagales	Iridaceae	Iris	Iris_typhifolia	GT	1	1
Streptophyta	Liliopsida	Asparagales	Iridaceae	Iris	Iris_versicolor	GC	1				2
Streptophyta	Liliopsida	Asparagales	Iridaceae	Iris	Iris_virginica	GC	1				1
Streptophyta	Liliopsida	Asparagales	Iridaceae	Moraea	Moraea_sisyrinchium	GT	1	1
Streptophyta	Liliopsida	Asparagales	Orchidaceae	Acianthera	Acianthera_johnsonii	GT	1	1
Streptophyta	Liliopsida	Asparagales	Orchidaceae	Acianthera	Acianthera_lojae	GT	1	1
Streptophyta	Liliopsida	Asparagales	Orchidaceae	Acianthera	Acianthera_luteola	GT	1	1
Streptophyta	Liliopsida	Asparagales	Orchidaceae	Acineta	Acineta_superba	GT	1	1
Streptophyta	Liliopsida	Asparagales	Orchidaceae	Aerides	Aerides_aff._lawrenceae_SB050	GT	1	1
Streptophyta	Liliopsida	Asparagales	Orchidaceae	Aerides	Aerides_aff._lawrenceae_Sul065	GT	1	1
Streptophyta	Liliopsida	Asparagales	Orchidaceae	Aerides	Aerides_crassifolia	GT	1	1
Streptophyta	Liliopsida	Asparagales	Orchidaceae	Aerides	Aerides_crispa	GT	1	1
Streptophyta	Liliopsida	Asparagales	Orchidaceae	Aerides	Aerides_emericii	GT	1	1
Streptophyta	Liliopsida	Asparagales	Orchidaceae	Aerides	Aerides_houlletiana	GT	1	1
Streptophyta	Liliopsida	Asparagales	Orchidaceae	Aerides	Aerides_inflexa	GT	1	1
Streptophyta	Liliopsida	Asparagales	Orchidaceae	Aerides	Aerides_krabiensis	GT	1	1
Streptophyta	Liliopsida	Asparagales	Orchidaceae	Aerides	Aerides_lawrenceae	GT	1	1
Streptophyta	Liliopsida	Asparagales	Orchidaceae	Aerides	Aerides_leeana	GT	1	5
Streptophyta	Liliopsida	Asparagales	Orchidaceae	Aerides	Aerides_multiflora	GT	1	8
Streptophyta	Liliopsida	Asparagales	Orchidaceae	Aerides	Aerides_odorata	GT	1	6
Streptophyta	Liliopsida	Asparagales	Orchidaceae	Aerides	Aerides_quinquevulnera	GT	1	1
Streptophyta	Liliopsida	Asparagales	Orchidaceae	Aerides	Aerides_ringens	GT	1	1
Streptophyta	Liliopsida	Asparagales	Orchidaceae	Aerides	Aerides_rosea	GT	1	1
Streptophyta	Liliopsida	Asparagales	Orchidaceae	Aerides	Aerides_rubescens	GT	1	1
Streptophyta	Liliopsida	Asparagales	Orchidaceae	Aerides	Aerides_sukauensis	GT	1	1
Streptophyta	Liliopsida	Asparagales	Orchidaceae	Aerides	Aerides_thibautiana	GT	1	2
Streptophyta	Liliopsida	Asparagales	Orchidaceae	Anacamptis	Anacamptis_pyramidalis	GT	1	2
Streptophyta	Liliopsida	Asparagales	Orchidaceae	Anathallis	Anathallis_adenochila	GT	1	1
Streptophyta	Liliopsida	Asparagales	Orchidaceae	Anathallis	Anathallis_aff._grayumii_FP3794	GT	1	1
Streptophyta	Liliopsida	Asparagales	Orchidaceae	Anathallis	Anathallis_aff._lewisiae_AK4795	GT	1	1
Streptophyta	Liliopsida	Asparagales	Orchidaceae	Anathallis	Anathallis_aff._rabei_AK4794	GT	1	1
Streptophyta	Liliopsida	Asparagales	Orchidaceae	Anathallis	Anathallis_anderssonii	GT	1	1
Streptophyta	Liliopsida	Asparagales	Orchidaceae	Anathallis	Anathallis_barbulata	GT	1	2
Streptophyta	Liliopsida	Asparagales	Orchidaceae	Anathallis	Anathallis_burzlaffiana	GT	1	1
Streptophyta	Liliopsida	Asparagales	Orchidaceae	Anathallis	Anathallis_cuspidata	GT	1	1
Streptophyta	Liliopsida	Asparagales	Orchidaceae	Anathallis	Anathallis_duplooyi	GT	1	1
Streptophyta	Liliopsida	Asparagales	Orchidaceae	Anathallis	Anathallis_fractiflexa	GT	1	1
Streptophyta	Liliopsida	Asparagales	Orchidaceae	Anathallis	Anathallis_grayumii	GT	1	1
Streptophyta	Liliopsida	Asparagales	Orchidaceae	Anathallis	Anathallis_lewisiae	GT	1	1
Streptophyta	Liliopsida	Asparagales	Orchidaceae	Anathallis	Anathallis_linearifolia	GT	1	1
Streptophyta	Liliopsida	Asparagales	Orchidaceae	Anathallis	Anathallis_nanifolia	GT	1	1
Streptophyta	Liliopsida	Asparagales	Orchidaceae	Anathallis	Anathallis_obovata	GT	1	1
Streptophyta	Liliopsida	Asparagales	Orchidaceae	Anathallis	Anathallis_pabstii	GT	1	1
Streptophyta	Liliopsida	Asparagales	Orchidaceae	Anathallis	Anathallis_peroupavae	GT	1	1
Streptophyta	Liliopsida	Asparagales	Orchidaceae	Anathallis	Anathallis_rubens	GT	1	1
Streptophyta	Liliopsida	Asparagales	Orchidaceae	Anathallis	Anathallis_sclerophylla	GT	1	2
Streptophyta	Liliopsida	Asparagales	Orchidaceae	Ancistrorhynchus	Ancistrorhynchus_cephalotes	GT	1	1
Streptophyta	Liliopsida	Asparagales	Orchidaceae	Andinia	Andinia_aff._dielsii_AK5429	GT	1	1
Streptophyta	Liliopsida	Asparagales	Orchidaceae	Andinia	Andinia_longiserpens	GT	1	1
Streptophyta	Liliopsida	Asparagales	Orchidaceae	Andinia	Andinia_platysepala	GT	1	1
Streptophyta	Liliopsida	Asparagales	Orchidaceae	Andinia	Andinia_schizopogon	GT	1	1
Streptophyta	Liliopsida	Asparagales	Orchidaceae	Anguloa	Anguloa_hohenlohii	GT	1	1
Streptophyta	Liliopsida	Asparagales	Orchidaceae	Apostasia	Apostasia_nipponica	GT	1	1
Streptophyta	Liliopsida	Asparagales	Orchidaceae	Apostasia	Apostasia_nuda	GT	1	1
Streptophyta	Liliopsida	Asparagales	Orchidaceae	Apostasia	Apostasia_odorata	GT	1	2
Streptophyta	Liliopsida	Asparagales	Orchidaceae	Apostasia	Apostasia_shenzhenica	GT	1	1
Streptophyta	Liliopsida	Asparagales	Orchidaceae	Apostasia	Apostasia_wallichii	GT	1	1
Streptophyta	Liliopsida	Asparagales	Orchidaceae	Batemannia	Batemannia_colleyi	GT	1	1
Streptophyta	Liliopsida	Asparagales	Orchidaceae	Benzingia	Benzingia_reichenbachiana	GT	1	1
Streptophyta	Liliopsida	Asparagales	Orchidaceae	Bifrenaria	Bifrenaria_atropurpurea	GT	1	1
Streptophyta	Liliopsida	Asparagales	Orchidaceae	Bifrenaria	Bifrenaria_calcarata	GT	1	1
Streptophyta	Liliopsida	Asparagales	Orchidaceae	Bifrenaria	Bifrenaria_charlesworthii	GT	1	1
Streptophyta	Liliopsida	Asparagales	Orchidaceae	Bifrenaria	Bifrenaria_clavigera	GT	1	1
Streptophyta	Liliopsida	Asparagales	Orchidaceae	Bifrenaria	Bifrenaria_inodora	GT	1	1
Streptophyta	Liliopsida	Asparagales	Orchidaceae	Bifrenaria	Bifrenaria_leucorhoda	GT	1	1
Streptophyta	Liliopsida	Asparagales	Orchidaceae	Bifrenaria	Bifrenaria_longicornis	GT	1	1
Streptophyta	Liliopsida	Asparagales	Orchidaceae	Bifrenaria	Bifrenaria_mellicolor	GT	1	1
Streptophyta	Liliopsida	Asparagales	Orchidaceae	Bifrenaria	Bifrenaria_stefanae	GT	1	1
Streptophyta	Liliopsida	Asparagales	Orchidaceae	Bifrenaria	Bifrenaria_tetragona	GT	1	1
Streptophyta	Liliopsida	Asparagales	Orchidaceae	Bifrenaria	Bifrenaria_tyrianthina	GT	1	1
Streptophyta	Liliopsida	Asparagales	Orchidaceae	Bifrenaria	Bifrenaria_wittigii	GT	1	1
Streptophyta	Liliopsida	Asparagales	Orchidaceae	Bletilla	Bletilla_formosana	GT	1	5
Streptophyta	Liliopsida	Asparagales	Orchidaceae	Bletilla	Bletilla_ochracea	GT	1	7
Streptophyta	Liliopsida	Asparagales	Orchidaceae	Bletilla	Bletilla_sinensis	GT	1	2
Streptophyta	Liliopsida	Asparagales	Orchidaceae	Braemia	Braemia_vittata	GT	1	1
Streptophyta	Liliopsida	Asparagales	Orchidaceae	Brassia	Brassia_arcuigera	GT	1	1
Streptophyta	Liliopsida	Asparagales	Orchidaceae	Brassia	Brassia_aurantiaca	GT	1	1
Streptophyta	Liliopsida	Asparagales	Orchidaceae	Brassia	Brassia_gireoudiana	GT	1	1
Streptophyta	Liliopsida	Asparagales	Orchidaceae	Brassia	Brassia_panamensis	GT	1	1
Streptophyta	Liliopsida	Asparagales	Orchidaceae	Bromheadia	Bromheadia_srilankensis	GT	1	1
Streptophyta	Liliopsida	Asparagales	Orchidaceae	Brownleea	Brownleea_macroceras	GT	1	1
Streptophyta	Liliopsida	Asparagales	Orchidaceae	Camaridium	Camaridium_carinatum	GT	1	1
Streptophyta	Liliopsida	Asparagales	Orchidaceae	Catasetum	Catasetum_fimbriatum	GT	1	1
Streptophyta	Liliopsida	Asparagales	Orchidaceae	Catasetum	Catasetum_saccatum	GT	1	1
Streptophyta	Liliopsida	Asparagales	Orchidaceae	Catasetum	Catasetum_sp._SRR-2011	GT	1	9
Streptophyta	Liliopsida	Asparagales	Orchidaceae	Cephalanthera	Cephalanthera_damasonium	GT	1	1
Streptophyta	Liliopsida	Asparagales	Orchidaceae	Cephalanthera	Cephalanthera_longifolia	GT	1	1
Streptophyta	Liliopsida	Asparagales	Orchidaceae	Cephalanthera	Cephalanthera_rubra	GT	1	1
Streptophyta	Liliopsida	Asparagales	Orchidaceae	Chaubardia	Chaubardia_heteroclita	GT	1	1
Streptophyta	Liliopsida	Asparagales	Orchidaceae	Chiloschista	Chiloschista_exuperei	GT	1	1
Streptophyta	Liliopsida	Asparagales	Orchidaceae	Christensonella	Christensonella_uncata	GT	1	1
Streptophyta	Liliopsida	Asparagales	Orchidaceae	Cirrhaea	Cirrhaea_dependens	GT	1	1
Streptophyta	Liliopsida	Asparagales	Orchidaceae	Cischweinfia	Cischweinfia_dasyandra	GT	1	1
Streptophyta	Liliopsida	Asparagales	Orchidaceae	Cleistes	Cleistes_itatiaiae	GT	1	1
Streptophyta	Liliopsida	Asparagales	Orchidaceae	Cleistes	Cleistes_uliginosa	GT	1	1
Streptophyta	Liliopsida	Asparagales	Orchidaceae	Clowesia	Clowesia_sp._SRR-2011	GT	1	2
Streptophyta	Liliopsida	Asparagales	Orchidaceae	Coeliopsis	Coeliopsis_hyacinthosma	GT	1	1
Streptophyta	Liliopsida	Asparagales	Orchidaceae	Coelogyne	Coelogyne_fimbriata	GT	1	1
Streptophyta	Liliopsida	Asparagales	Orchidaceae	Coelogyne	Coelogyne_swaniana	GT	1	1
Streptophyta	Liliopsida	Asparagales	Orchidaceae	Collabium	Collabium_simplex	GT	1	1
Streptophyta	Liliopsida	Asparagales	Orchidaceae	Corallorhiza	Corallorhiza_bulbosa	GT	1	1
Streptophyta	Liliopsida	Asparagales	Orchidaceae	Corallorhiza	Corallorhiza_macrantha	GT	1	1
Streptophyta	Liliopsida	Asparagales	Orchidaceae	Corallorhiza	Corallorhiza_maculata	GT	1	3
Streptophyta	Liliopsida	Asparagales	Orchidaceae	Corallorhiza	Corallorhiza_mertensiana	GT	1	1
Streptophyta	Liliopsida	Asparagales	Orchidaceae	Corallorhiza	Corallorhiza_odontorhiza	GT	1	1
Streptophyta	Liliopsida	Asparagales	Orchidaceae	Corallorhiza	Corallorhiza_striata	GT	1	1
Streptophyta	Liliopsida	Asparagales	Orchidaceae	Corallorhiza	Corallorhiza_trifida	GT	1	2
Streptophyta	Liliopsida	Asparagales	Orchidaceae	Corallorhiza	Corallorhiza_wisteriana	GT	1	1
Streptophyta	Liliopsida	Asparagales	Orchidaceae	Coryanthes	Coryanthes_elegantium	GT	1	1
Streptophyta	Liliopsida	Asparagales	Orchidaceae	Coryanthes	Coryanthes_macrantha	GT	1	1
Streptophyta	Liliopsida	Asparagales	Orchidaceae	Coryanthes	Coryanthes_sp._SRR-2011	GT	1	5
Streptophyta	Liliopsida	Asparagales	Orchidaceae	Crepidium	Crepidium_bancanoides	GT	1	1
Streptophyta	Liliopsida	Asparagales	Orchidaceae	Crepidium	Crepidium_brevidentatum	GT	1	1
Streptophyta	Liliopsida	Asparagales	Orchidaceae	Crepidium	Crepidium_oculatum	GT	1	1
Streptophyta	Liliopsida	Asparagales	Orchidaceae	Crepidium	Crepidium_perakense	GT	1	1
Streptophyta	Liliopsida	Asparagales	Orchidaceae	Cryptarrhena	Cryptarrhena_lunata	GT	1	1
Streptophyta	Liliopsida	Asparagales	Orchidaceae	Cuitlauzina	Cuitlauzina_pendula	GT	1	1
Streptophyta	Liliopsida	Asparagales	Orchidaceae	Cycnoches	Cycnoches_sp._SRR-2011	GC	1				8
Streptophyta	Liliopsida	Asparagales	Orchidaceae	Cymbidium	Cymbidium_ensifolium	GT	1	1
Streptophyta	Liliopsida	Asparagales	Orchidaceae	Cymbidium	Cymbidium_haematodes	GT	1	1
Streptophyta	Liliopsida	Asparagales	Orchidaceae	Cymbidium	Cymbidium_lancifolium	GT	1	1
Streptophyta	Liliopsida	Asparagales	Orchidaceae	Cymbidium	Cymbidium_macrorhizon	GT	1	1
Streptophyta	Liliopsida	Asparagales	Orchidaceae	Cymbidium	Cymbidium_nagifolium	GT	1	1
Streptophyta	Liliopsida	Asparagales	Orchidaceae	Cypripedium	Cypripedium_calceolus	GT	1	1
Streptophyta	Liliopsida	Asparagales	Orchidaceae	Cyrtochilum	Cyrtochilum_annulare	GT	1	1
Streptophyta	Liliopsida	Asparagales	Orchidaceae	Dactylorhiza	Dactylorhiza_fuchsii	GT	1	1
Streptophyta	Liliopsida	Asparagales	Orchidaceae	Dactylorhiza	Dactylorhiza_incarnata	GT	1	5
Streptophyta	Liliopsida	Asparagales	Orchidaceae	Dactylorhiza	Dactylorhiza_maculata	GT	1	3
Streptophyta	Liliopsida	Asparagales	Orchidaceae	Dactylorhiza	Dactylorhiza_majalis	GT	1	1
Streptophyta	Liliopsida	Asparagales	Orchidaceae	Dactylorhiza	Dactylorhiza_umbrosa	GT	1	1
Streptophyta	Liliopsida	Asparagales	Orchidaceae	Dactylorhiza	Dactylorhiza_viridis	GT	1	3
Streptophyta	Liliopsida	Asparagales	Orchidaceae	Dendrobium	Dendrobium_acerosum	GT	1	1
Streptophyta	Liliopsida	Asparagales	Orchidaceae	Dendrobium	Dendrobium_adae	GT	1	1
Streptophyta	Liliopsida	Asparagales	Orchidaceae	Dendrobium	Dendrobium_aduncum	GT	1	3
Streptophyta	Liliopsida	Asparagales	Orchidaceae	Dendrobium	Dendrobium_aff._anosmum_TBG_159409	GT	1	1
Streptophyta	Liliopsida	Asparagales	Orchidaceae	Dendrobium	Dendrobium_aff._densiflorum_TBG_159449	GT	1	1
Streptophyta	Liliopsida	Asparagales	Orchidaceae	Dendrobium	Dendrobium_aff._moniliforme_TBG_124453	GT	1	1
Streptophyta	Liliopsida	Asparagales	Orchidaceae	Dendrobium	Dendrobium_aff._signatum_TBG_118279	GT	1	1
Streptophyta	Liliopsida	Asparagales	Orchidaceae	Dendrobium	Dendrobium_alaticaulinum	GT	1	1
Streptophyta	Liliopsida	Asparagales	Orchidaceae	Dendrobium	Dendrobium_albosanguineum	GT	1	2
Streptophyta	Liliopsida	Asparagales	Orchidaceae	Dendrobium	Dendrobium_amabile	GT	1	1
Streptophyta	Liliopsida	Asparagales	Orchidaceae	Dendrobium	Dendrobium_amethystoglossum	GT	1	1
Streptophyta	Liliopsida	Asparagales	Orchidaceae	Dendrobium	Dendrobium_amoenum	GT	1	1
Streptophyta	Liliopsida	Asparagales	Orchidaceae	Dendrobium	Dendrobium_annae	GT	1	1
Streptophyta	Liliopsida	Asparagales	Orchidaceae	Dendrobium	Dendrobium_anosmum	GT	1	2
Streptophyta	Liliopsida	Asparagales	Orchidaceae	Dendrobium	Dendrobium_aphanochilum	GT	1	1
Streptophyta	Liliopsida	Asparagales	Orchidaceae	Dendrobium	Dendrobium_aphrodite	GT	1	1
Streptophyta	Liliopsida	Asparagales	Orchidaceae	Dendrobium	Dendrobium_aphyllum	GT	1	2
Streptophyta	Liliopsida	Asparagales	Orchidaceae	Dendrobium	Dendrobium_atavus	GT	1	1
Streptophyta	Liliopsida	Asparagales	Orchidaceae	Dendrobium	Dendrobium_aurantiacum	GT	1	1
Streptophyta	Liliopsida	Asparagales	Orchidaceae	Dendrobium	Dendrobium_auriculatum	GT	1	1
Streptophyta	Liliopsida	Asparagales	Orchidaceae	Dendrobium	Dendrobium_austrocaledonicum	GT	1	1
Streptophyta	Liliopsida	Asparagales	Orchidaceae	Dendrobium	Dendrobium_bensoniae	GT	1	1
Streptophyta	Liliopsida	Asparagales	Orchidaceae	Dendrobium	Dendrobium_bifarium	GT	1	1
Streptophyta	Liliopsida	Asparagales	Orchidaceae	Dendrobium	Dendrobium_bifurcatum	GT	1	1
Streptophyta	Liliopsida	Asparagales	Orchidaceae	Dendrobium	Dendrobium_bracteosum	GT	1	1
Streptophyta	Liliopsida	Asparagales	Orchidaceae	Dendrobium	Dendrobium_braianense	GT	1	1
Streptophyta	Liliopsida	Asparagales	Orchidaceae	Dendrobium	Dendrobium_brymerianum	GT	1	1
Streptophyta	Liliopsida	Asparagales	Orchidaceae	Dendrobium	Dendrobium_calcaratum	GT	1	1
Streptophyta	Liliopsida	Asparagales	Orchidaceae	Dendrobium	Dendrobium_calceolum	GT	1	1
Streptophyta	Liliopsida	Asparagales	Orchidaceae	Dendrobium	Dendrobium_caliculi-mentum	GT	1	1
Streptophyta	Liliopsida	Asparagales	Orchidaceae	Dendrobium	Dendrobium_callitrophilum	GT	1	1
Streptophyta	Liliopsida	Asparagales	Orchidaceae	Dendrobium	Dendrobium_candidum	GT	1	1
Streptophyta	Liliopsida	Asparagales	Orchidaceae	Dendrobium	Dendrobium_capillipes	GT	1	3
Streptophyta	Liliopsida	Asparagales	Orchidaceae	Dendrobium	Dendrobium_catenatum	GT	1	7
Streptophyta	Liliopsida	Asparagales	Orchidaceae	Dendrobium	Dendrobium_cf._candidum_Yukawa_et_al._29746	GT	1	1
Streptophyta	Liliopsida	Asparagales	Orchidaceae	Dendrobium	Dendrobium_cf._griffithianum_TBG_128876	GT	1	1
Streptophyta	Liliopsida	Asparagales	Orchidaceae	Dendrobium	Dendrobium_cf._microglaphys_TBG_116027	GT	1	1
Streptophyta	Liliopsida	Asparagales	Orchidaceae	Dendrobium	Dendrobium_cf._primulinum_TBG_118293	GT	1	1
Streptophyta	Liliopsida	Asparagales	Orchidaceae	Dendrobium	Dendrobium_chameleon	GT	1	2
Streptophyta	Liliopsida	Asparagales	Orchidaceae	Dendrobium	Dendrobium_christyanum	GT	1	1
Streptophyta	Liliopsida	Asparagales	Orchidaceae	Dendrobium	Dendrobium_chrysanthum	GT	1	6
Streptophyta	Liliopsida	Asparagales	Orchidaceae	Dendrobium	Dendrobium_chryseum	GT	1	1
Streptophyta	Liliopsida	Asparagales	Orchidaceae	Dendrobium	Dendrobium_chrysocrepis	GT	1	1
Streptophyta	Liliopsida	Asparagales	Orchidaceae	Dendrobium	Dendrobium_chrysotoxum	GT	1	5
Streptophyta	Liliopsida	Asparagales	Orchidaceae	Dendrobium	Dendrobium_clavatum	GT	1	1
Streptophyta	Liliopsida	Asparagales	Orchidaceae	Dendrobium	Dendrobium_comatum	GT	1	1
Streptophyta	Liliopsida	Asparagales	Orchidaceae	Dendrobium	Dendrobium_compactum	GT	1	1
Streptophyta	Liliopsida	Asparagales	Orchidaceae	Dendrobium	Dendrobium_crepidatum	GT	1	2
Streptophyta	Liliopsida	Asparagales	Orchidaceae	Dendrobium	Dendrobium_cruentum	GT	1	2
Streptophyta	Liliopsida	Asparagales	Orchidaceae	Dendrobium	Dendrobium_crumenatum	GT	1	3
Streptophyta	Liliopsida	Asparagales	Orchidaceae	Dendrobium	Dendrobium_crystallinum	GT	1	1
Streptophyta	Liliopsida	Asparagales	Orchidaceae	Dendrobium	Dendrobium_cumulatum	GT	1	2
Streptophyta	Liliopsida	Asparagales	Orchidaceae	Dendrobium	Dendrobium_cuthbertsonii	GT	1	1
Streptophyta	Liliopsida	Asparagales	Orchidaceae	Dendrobium	Dendrobium_cyanocentrum	GT	1	1
Streptophyta	Liliopsida	Asparagales	Orchidaceae	Dendrobium	Dendrobium_delacourii	GT	1	1
Streptophyta	Liliopsida	Asparagales	Orchidaceae	Dendrobium	Dendrobium_densiflorum	GT	1	3
Streptophyta	Liliopsida	Asparagales	Orchidaceae	Dendrobium	Dendrobium_denudans	GT	1	1
Streptophyta	Liliopsida	Asparagales	Orchidaceae	Dendrobium	Dendrobium_devonianum	GT	1	1
Streptophyta	Liliopsida	Asparagales	Orchidaceae	Dendrobium	Dendrobium_diodon	GT	1	1
Streptophyta	Liliopsida	Asparagales	Orchidaceae	Dendrobium	Dendrobium_distichum	GT	1	1
Streptophyta	Liliopsida	Asparagales	Orchidaceae	Dendrobium	Dendrobium_dixanthum	GT	1	2
Streptophyta	Liliopsida	Asparagales	Orchidaceae	Dendrobium	Dendrobium_ellipsophyllum	GT	1	1
Streptophyta	Liliopsida	Asparagales	Orchidaceae	Dendrobium	Dendrobium_ephemerum	GT	1	1
Streptophyta	Liliopsida	Asparagales	Orchidaceae	Dendrobium	Dendrobium_equitans	GT	1	1
Streptophyta	Liliopsida	Asparagales	Orchidaceae	Dendrobium	Dendrobium_eriiflorum	GT	1	1
Streptophyta	Liliopsida	Asparagales	Orchidaceae	Dendrobium	Dendrobium_erosum	GT	1	1
Streptophyta	Liliopsida	Asparagales	Orchidaceae	Dendrobium	Dendrobium_eserre	GT	1	1
Streptophyta	Liliopsida	Asparagales	Orchidaceae	Dendrobium	Dendrobium_fairchildiae	GT	1	1
Streptophyta	Liliopsida	Asparagales	Orchidaceae	Dendrobium	Dendrobium_falconeri	GT	1	1
Streptophyta	Liliopsida	Asparagales	Orchidaceae	Dendrobium	Dendrobium_farmeri	GT	1	1
Streptophyta	Liliopsida	Asparagales	Orchidaceae	Dendrobium	Dendrobium_fimbriatum	GT	1	3
Streptophyta	Liliopsida	Asparagales	Orchidaceae	Dendrobium	Dendrobium_findlayanum	GT	1	2
Streptophyta	Liliopsida	Asparagales	Orchidaceae	Dendrobium	Dendrobium_formosum	GT	1	2
Streptophyta	Liliopsida	Asparagales	Orchidaceae	Dendrobium	Dendrobium_friedericksianum	GT	1	2
Streptophyta	Liliopsida	Asparagales	Orchidaceae	Dendrobium	Dendrobium_furcatum	GT	1	1
Streptophyta	Liliopsida	Asparagales	Orchidaceae	Dendrobium	Dendrobium_fytchianum	GT	1	1
Streptophyta	Liliopsida	Asparagales	Orchidaceae	Dendrobium	Dendrobium_gibsonii	GT	1	1
Streptophyta	Liliopsida	Asparagales	Orchidaceae	Dendrobium	Dendrobium_goldschmidtianum	GT	1	1
Streptophyta	Liliopsida	Asparagales	Orchidaceae	Dendrobium	Dendrobium_gratiosissimum	GT	1	1
Streptophyta	Liliopsida	Asparagales	Orchidaceae	Dendrobium	Dendrobium_gregulus	GT	1	1
Streptophyta	Liliopsida	Asparagales	Orchidaceae	Dendrobium	Dendrobium_griffithianum	GT	1	1
Streptophyta	Liliopsida	Asparagales	Orchidaceae	Dendrobium	Dendrobium_guibertii	GT	1	1
Streptophyta	Liliopsida	Asparagales	Orchidaceae	Dendrobium	Dendrobium_hancockii	GT	1	3
Streptophyta	Liliopsida	Asparagales	Orchidaceae	Dendrobium	Dendrobium_harveyanum	GT	1	1
Streptophyta	Liliopsida	Asparagales	Orchidaceae	Dendrobium	Dendrobium_hasseltii	GT	1	1
Streptophyta	Liliopsida	Asparagales	Orchidaceae	Dendrobium	Dendrobium_hemimelanoglossum	GT	1	1
Streptophyta	Liliopsida	Asparagales	Orchidaceae	Dendrobium	Dendrobium_henanense	GT	1	2
Streptophyta	Liliopsida	Asparagales	Orchidaceae	Dendrobium	Dendrobium_henryi	GT	1	1
Streptophyta	Liliopsida	Asparagales	Orchidaceae	Dendrobium	Dendrobium_hercoglossum	GT	1	4
Streptophyta	Liliopsida	Asparagales	Orchidaceae	Dendrobium	Dendrobium_hookerianum	GT	1	1
Streptophyta	Liliopsida	Asparagales	Orchidaceae	Dendrobium	Dendrobium_huoshanense	GT	1	5
Streptophyta	Liliopsida	Asparagales	Orchidaceae	Dendrobium	Dendrobium_infundibulum	GT	1	1
Streptophyta	Liliopsida	Asparagales	Orchidaceae	Dendrobium	Dendrobium_intricatum	GT	1	1
Streptophyta	Liliopsida	Asparagales	Orchidaceae	Dendrobium	Dendrobium_jacobsonii	GT	1	1
Streptophyta	Liliopsida	Asparagales	Orchidaceae	Dendrobium	Dendrobium_jenkinsii	GT	1	2
Streptophyta	Liliopsida	Asparagales	Orchidaceae	Dendrobium	Dendrobium_junceum	GT	1	1
Streptophyta	Liliopsida	Asparagales	Orchidaceae	Dendrobium	Dendrobium_kentrophyllum	GT	1	1
Streptophyta	Liliopsida	Asparagales	Orchidaceae	Dendrobium	Dendrobium_kingianum	GT	1	1
Streptophyta	Liliopsida	Asparagales	Orchidaceae	Dendrobium	Dendrobium_laevifolium	GT	1	1
Streptophyta	Liliopsida	Asparagales	Orchidaceae	Dendrobium	Dendrobium_lamyaiae	GT	1	1
Streptophyta	Liliopsida	Asparagales	Orchidaceae	Dendrobium	Dendrobium_lawesii	GT	1	1
Streptophyta	Liliopsida	Asparagales	Orchidaceae	Dendrobium	Dendrobium_leonis	GT	1	1
Streptophyta	Liliopsida	Asparagales	Orchidaceae	Dendrobium	Dendrobium_leptocladum	GT	1	2
Streptophyta	Liliopsida	Asparagales	Orchidaceae	Dendrobium	Dendrobium_linawianum	GT	1	2
Streptophyta	Liliopsida	Asparagales	Orchidaceae	Dendrobium	Dendrobium_lindleyi	GT	1	3
Streptophyta	Liliopsida	Asparagales	Orchidaceae	Dendrobium	Dendrobium_linguella	GT	1	1
Streptophyta	Liliopsida	Asparagales	Orchidaceae	Dendrobium	Dendrobium_lituiflorum	GT	1	1
Streptophyta	Liliopsida	Asparagales	Orchidaceae	Dendrobium	Dendrobium_lobbii	GT	1	1
Streptophyta	Liliopsida	Asparagales	Orchidaceae	Dendrobium	Dendrobium_loddigesii	GT	1	3
Streptophyta	Liliopsida	Asparagales	Orchidaceae	Dendrobium	Dendrobium_lohohense	GT	1	2
Streptophyta	Liliopsida	Asparagales	Orchidaceae	Dendrobium	Dendrobium_luteolum	GT	1	1
Streptophyta	Liliopsida	Asparagales	Orchidaceae	Dendrobium	Dendrobium_maccarthiae	GT	1	1
Streptophyta	Liliopsida	Asparagales	Orchidaceae	Dendrobium	Dendrobium_masarangense	GT	1	1
Streptophyta	Liliopsida	Asparagales	Orchidaceae	Dendrobium	Dendrobium_melanostictum	GT	1	1
Streptophyta	Liliopsida	Asparagales	Orchidaceae	Dendrobium	Dendrobium_melinanthum	GT	1	1
Streptophyta	Liliopsida	Asparagales	Orchidaceae	Dendrobium	Dendrobium_microglaphys	GT	1	1
Streptophyta	Liliopsida	Asparagales	Orchidaceae	Dendrobium	Dendrobium_miyakei	GT	1	1
Streptophyta	Liliopsida	Asparagales	Orchidaceae	Dendrobium	Dendrobium_mohlianum	GT	1	1
Streptophyta	Liliopsida	Asparagales	Orchidaceae	Dendrobium	Dendrobium_moniliforme	GT	1	3
Streptophyta	Liliopsida	Asparagales	Orchidaceae	Dendrobium	Dendrobium_moschatum	GT	1	3
Streptophyta	Liliopsida	Asparagales	Orchidaceae	Dendrobium	Dendrobium_mutabile	GT	1	1
Streptophyta	Liliopsida	Asparagales	Orchidaceae	Dendrobium	Dendrobium_nobile	GT	1	4
Streptophyta	Liliopsida	Asparagales	Orchidaceae	Dendrobium	Dendrobium_ochreatum	GT	1	1
Streptophyta	Liliopsida	Asparagales	Orchidaceae	Dendrobium	Dendrobium_pachyglossum	GT	1	1
Streptophyta	Liliopsida	Asparagales	Orchidaceae	Dendrobium	Dendrobium_pachyphyllum	GT	1	1
Streptophyta	Liliopsida	Asparagales	Orchidaceae	Dendrobium	Dendrobium_palpebrae	GT	1	4
Streptophyta	Liliopsida	Asparagales	Orchidaceae	Dendrobium	Dendrobium_parciflorum	GT	1	1
Streptophyta	Liliopsida	Asparagales	Orchidaceae	Dendrobium	Dendrobium_parcum	GT	1	1
Streptophyta	Liliopsida	Asparagales	Orchidaceae	Dendrobium	Dendrobium_parishii	GT	1	3
Streptophyta	Liliopsida	Asparagales	Orchidaceae	Dendrobium	Dendrobium_pendulum	GT	1	1
Streptophyta	Liliopsida	Asparagales	Orchidaceae	Dendrobium	Dendrobium_philippinense	GT	1	1
Streptophyta	Liliopsida	Asparagales	Orchidaceae	Dendrobium	Dendrobium_platygastrium	GT	1	1
Streptophyta	Liliopsida	Asparagales	Orchidaceae	Dendrobium	Dendrobium_polyanthum	GT	1	1
Streptophyta	Liliopsida	Asparagales	Orchidaceae	Dendrobium	Dendrobium_porphyrochilum	GT	1	1
Streptophyta	Liliopsida	Asparagales	Orchidaceae	Dendrobium	Dendrobium_praecinctum	GT	1	1
Streptophyta	Liliopsida	Asparagales	Orchidaceae	Dendrobium	Dendrobium_prasinum	GT	1	1
Streptophyta	Liliopsida	Asparagales	Orchidaceae	Dendrobium	Dendrobium_prianganense	GT	1	1
Streptophyta	Liliopsida	Asparagales	Orchidaceae	Dendrobium	Dendrobium_primulinum	GT	1	2
Streptophyta	Liliopsida	Asparagales	Orchidaceae	Dendrobium	Dendrobium_profusum	GT	1	1
Streptophyta	Liliopsida	Asparagales	Orchidaceae	Dendrobium	Dendrobium_pulchellum	GT	1	1
Streptophyta	Liliopsida	Asparagales	Orchidaceae	Dendrobium	Dendrobium_rarum	GT	1	1
Streptophyta	Liliopsida	Asparagales	Orchidaceae	Dendrobium	Dendrobium_rhombeum	GT	1	1
Streptophyta	Liliopsida	Asparagales	Orchidaceae	Dendrobium	Dendrobium_roseipes	GT	1	1
Streptophyta	Liliopsida	Asparagales	Orchidaceae	Dendrobium	Dendrobium_rosellum	GT	1	1
Streptophyta	Liliopsida	Asparagales	Orchidaceae	Dendrobium	Dendrobium_ruckeri	GT	1	1
Streptophyta	Liliopsida	Asparagales	Orchidaceae	Dendrobium	Dendrobium_sanderae	GT	1	1
Streptophyta	Liliopsida	Asparagales	Orchidaceae	Dendrobium	Dendrobium_sanguinolentum	GT	1	1
Streptophyta	Liliopsida	Asparagales	Orchidaceae	Dendrobium	Dendrobium_scabrilingue	GT	1	1
Streptophyta	Liliopsida	Asparagales	Orchidaceae	Dendrobium	Dendrobium_schuetzei	GT	1	1
Streptophyta	Liliopsida	Asparagales	Orchidaceae	Dendrobium	Dendrobium_scoriarum	GT	1	1
Streptophyta	Liliopsida	Asparagales	Orchidaceae	Dendrobium	Dendrobium_secundum	GT	1	1
Streptophyta	Liliopsida	Asparagales	Orchidaceae	Dendrobium	Dendrobium_senile	GT	1	1
Streptophyta	Liliopsida	Asparagales	Orchidaceae	Dendrobium	Dendrobium_signatum	GT	1	2
Streptophyta	Liliopsida	Asparagales	Orchidaceae	Dendrobium	Dendrobium_smillieae	GT	1	1
Streptophyta	Liliopsida	Asparagales	Orchidaceae	Dendrobium	Dendrobium_somae	GT	1	1
Streptophyta	Liliopsida	Asparagales	Orchidaceae	Dendrobium	Dendrobium_sp._MS-2016	GT	1	1
Streptophyta	Liliopsida	Asparagales	Orchidaceae	Dendrobium	Dendrobium_speckmaieri	GT	1	1
Streptophyta	Liliopsida	Asparagales	Orchidaceae	Dendrobium	Dendrobium_spectatissimum	GT	1	1
Streptophyta	Liliopsida	Asparagales	Orchidaceae	Dendrobium	Dendrobium_stockeri	GT	1	1
Streptophyta	Liliopsida	Asparagales	Orchidaceae	Dendrobium	Dendrobium_stuposum	GT	1	1
Streptophyta	Liliopsida	Asparagales	Orchidaceae	Dendrobium	Dendrobium_sulcatum	GT	1	1
Streptophyta	Liliopsida	Asparagales	Orchidaceae	Dendrobium	Dendrobium_sutepense	GT	1	1
Streptophyta	Liliopsida	Asparagales	Orchidaceae	Dendrobium	Dendrobium_thyrsiflorum	GT	1	1
Streptophyta	Liliopsida	Asparagales	Orchidaceae	Dendrobium	Dendrobium_tobaense	AT	1		1
Streptophyta	Liliopsida	Asparagales	Orchidaceae	Dendrobium	Dendrobium_tortile	GT	1	1
Streptophyta	Liliopsida	Asparagales	Orchidaceae	Dendrobium	Dendrobium_tosaense	GT	1	1
Streptophyta	Liliopsida	Asparagales	Orchidaceae	Dendrobium	Dendrobium_transparens	GT	1	1
Streptophyta	Liliopsida	Asparagales	Orchidaceae	Dendrobium	Dendrobium_trichostomum	GT	1	1
Streptophyta	Liliopsida	Asparagales	Orchidaceae	Dendrobium	Dendrobium_unicum	GT	1	2
Streptophyta	Liliopsida	Asparagales	Orchidaceae	Dendrobium	Dendrobium_violaceum	GT	1	1
Streptophyta	Liliopsida	Asparagales	Orchidaceae	Dendrobium	Dendrobium_virgineum	GT	1	1
Streptophyta	Liliopsida	Asparagales	Orchidaceae	Dendrobium	Dendrobium_wardianum	GT	1	1
Streptophyta	Liliopsida	Asparagales	Orchidaceae	Dendrobium	Dendrobium_williamsonii	GT	1	1
Streptophyta	Liliopsida	Asparagales	Orchidaceae	Dendrobium	Dendrobium_ypsilon	GT	1	1
Streptophyta	Liliopsida	Asparagales	Orchidaceae	Dichaea	Dichaea_muricata	GT	1	1
Streptophyta	Liliopsida	Asparagales	Orchidaceae	Dichaea	Dichaea_neglecta	GT	1	1
Streptophyta	Liliopsida	Asparagales	Orchidaceae	Dichaea	Dichaea_sp._SRR-2011	AT	0.5	1	1
Streptophyta	Liliopsida	Asparagales	Orchidaceae	Dimorphorchis	Dimorphorchis_rossii	GT	1	1
Streptophyta	Liliopsida	Asparagales	Orchidaceae	Disa	Disa_aconitoides	GT	1	2
Streptophyta	Liliopsida	Asparagales	Orchidaceae	Disa	Disa_alticola	GT	1	1
Streptophyta	Liliopsida	Asparagales	Orchidaceae	Disa	Disa_amoena	GT	1	1
Streptophyta	Liliopsida	Asparagales	Orchidaceae	Disa	Disa_aristata	GT	1	1
Streptophyta	Liliopsida	Asparagales	Orchidaceae	Disa	Disa_atricapilla	GT	1	1
Streptophyta	Liliopsida	Asparagales	Orchidaceae	Disa	Disa_atrorubens	GT	1	1
Streptophyta	Liliopsida	Asparagales	Orchidaceae	Disa	Disa_aurata	GT	1	1
Streptophyta	Liliopsida	Asparagales	Orchidaceae	Disa	Disa_barbata	GT	1	1
Streptophyta	Liliopsida	Asparagales	Orchidaceae	Disa	Disa_baurii	GT	1	1
Streptophyta	Liliopsida	Asparagales	Orchidaceae	Disa	Disa_bifida	GT	1	1
Streptophyta	Liliopsida	Asparagales	Orchidaceae	Disa	Disa_biflora	GT	1	1
Streptophyta	Liliopsida	Asparagales	Orchidaceae	Disa	Disa_bivalvata	GT	1	1
Streptophyta	Liliopsida	Asparagales	Orchidaceae	Disa	Disa_bodkinii	GT	1	1
Streptophyta	Liliopsida	Asparagales	Orchidaceae	Disa	Disa_bolusiana	GT	1	1
Streptophyta	Liliopsida	Asparagales	Orchidaceae	Disa	Disa_borbonica	GT	1	1
Streptophyta	Liliopsida	Asparagales	Orchidaceae	Disa	Disa_brachyceras	GT	1	1
Streptophyta	Liliopsida	Asparagales	Orchidaceae	Disa	Disa_bracteata	GT	1	1
Streptophyta	Liliopsida	Asparagales	Orchidaceae	Disa	Disa_brevicornis	GT	1	1
Streptophyta	Liliopsida	Asparagales	Orchidaceae	Disa	Disa_buchenaviana	GT	1	1
Streptophyta	Liliopsida	Asparagales	Orchidaceae	Disa	Disa_caffra	GT	1	1
Streptophyta	Liliopsida	Asparagales	Orchidaceae	Disa	Disa_cardinalis	GT	1	1
Streptophyta	Liliopsida	Asparagales	Orchidaceae	Disa	Disa_caulescens	GT	1	1
Streptophyta	Liliopsida	Asparagales	Orchidaceae	Disa	Disa_celata	GT	1	1
Streptophyta	Liliopsida	Asparagales	Orchidaceae	Disa	Disa_cephalotes	GT	1	2
Streptophyta	Liliopsida	Asparagales	Orchidaceae	Disa	Disa_chrysostachya	GT	1	1
Streptophyta	Liliopsida	Asparagales	Orchidaceae	Disa	Disa_comosa	GT	1	1
Streptophyta	Liliopsida	Asparagales	Orchidaceae	Disa	Disa_conferta	GT	1	1
Streptophyta	Liliopsida	Asparagales	Orchidaceae	Disa	Disa_cooperi	GT	1	1
Streptophyta	Liliopsida	Asparagales	Orchidaceae	Disa	Disa_cornuta	GT	1	1
Streptophyta	Liliopsida	Asparagales	Orchidaceae	Disa	Disa_crassicornis	GT	1	1
Streptophyta	Liliopsida	Asparagales	Orchidaceae	Disa	Disa_cylindrica	GT	1	1
Streptophyta	Liliopsida	Asparagales	Orchidaceae	Disa	Disa_densiflora	GT	1	1
Streptophyta	Liliopsida	Asparagales	Orchidaceae	Disa	Disa_draconis	GT	1	1
Streptophyta	Liliopsida	Asparagales	Orchidaceae	Disa	Disa_elegans	GT	1	1
Streptophyta	Liliopsida	Asparagales	Orchidaceae	Disa	Disa_erubescens	GT	1	2
Streptophyta	Liliopsida	Asparagales	Orchidaceae	Disa	Disa_extinctoria	GT	1	1
Streptophyta	Liliopsida	Asparagales	Orchidaceae	Disa	Disa_fasciata	GT	1	1
Streptophyta	Liliopsida	Asparagales	Orchidaceae	Disa	Disa_ferruginea	GT	1	1
Streptophyta	Liliopsida	Asparagales	Orchidaceae	Disa	Disa_filicornis	AT	1		1
Streptophyta	Liliopsida	Asparagales	Orchidaceae	Disa	Disa_flexuosa	GT	1	1
Streptophyta	Liliopsida	Asparagales	Orchidaceae	Disa	Disa_fragrans	GT	1	1
Streptophyta	Liliopsida	Asparagales	Orchidaceae	Disa	Disa_galpinii	GT	1	1
Streptophyta	Liliopsida	Asparagales	Orchidaceae	Disa	Disa_gladioliflora	GT	1	2
Streptophyta	Liliopsida	Asparagales	Orchidaceae	Disa	Disa_glandulosa	GT	1	1
Streptophyta	Liliopsida	Asparagales	Orchidaceae	Disa	Disa_graminifolia	GT	1	1
Streptophyta	Liliopsida	Asparagales	Orchidaceae	Disa	Disa_hallackii	GT	1	1
Streptophyta	Liliopsida	Asparagales	Orchidaceae	Disa	Disa_harveyana	GT	1	2
Streptophyta	Liliopsida	Asparagales	Orchidaceae	Disa	Disa_hians	GT	1	1
Streptophyta	Liliopsida	Asparagales	Orchidaceae	Disa	Disa_hircicornis	GT	1	1
Streptophyta	Liliopsida	Asparagales	Orchidaceae	Disa	Disa_inflexa	GT	1	1
Streptophyta	Liliopsida	Asparagales	Orchidaceae	Disa	Disa_intermedia	GT	1	1
Streptophyta	Liliopsida	Asparagales	Orchidaceae	Disa	Disa_karooica	GT	1	1
Streptophyta	Liliopsida	Asparagales	Orchidaceae	Disa	Disa_longicornu	GT	1	1
Streptophyta	Liliopsida	Asparagales	Orchidaceae	Disa	Disa_lugens	GT	1	1
Streptophyta	Liliopsida	Asparagales	Orchidaceae	Disa	Disa_maculata	GT	1	1
Streptophyta	Liliopsida	Asparagales	Orchidaceae	Disa	Disa_marlothii	GT	1	1
Streptophyta	Liliopsida	Asparagales	Orchidaceae	Disa	Disa_miniata	GT	1	1
Streptophyta	Liliopsida	Asparagales	Orchidaceae	Disa	Disa_montana	GT	1	1
Streptophyta	Liliopsida	Asparagales	Orchidaceae	Disa	Disa_multifida	GT	1	1
Streptophyta	Liliopsida	Asparagales	Orchidaceae	Disa	Disa_neglecta	GT	1	1
Streptophyta	Liliopsida	Asparagales	Orchidaceae	Disa	Disa_nervosa	GT	1	1
Streptophyta	Liliopsida	Asparagales	Orchidaceae	Disa	Disa_nivea	GT	1	1
Streptophyta	Liliopsida	Asparagales	Orchidaceae	Disa	Disa_obliqua	GT	1	2
Streptophyta	Liliopsida	Asparagales	Orchidaceae	Disa	Disa_obtusa	GT	1	2
Streptophyta	Liliopsida	Asparagales	Orchidaceae	Disa	Disa_ocellata	GT	1	1
Streptophyta	Liliopsida	Asparagales	Orchidaceae	Disa	Disa_ochrostachya	GT	1	1
Streptophyta	Liliopsida	Asparagales	Orchidaceae	Disa	Disa_ophrydea	GT	1	1
Streptophyta	Liliopsida	Asparagales	Orchidaceae	Disa	Disa_oreophila	GT	1	2
Streptophyta	Liliopsida	Asparagales	Orchidaceae	Disa	Disa_ornithantha	GT	1	1
Streptophyta	Liliopsida	Asparagales	Orchidaceae	Disa	Disa_ovalifolia	GT	1	1
Streptophyta	Liliopsida	Asparagales	Orchidaceae	Disa	Disa_patula	GT	1	1
Streptophyta	Liliopsida	Asparagales	Orchidaceae	Disa	Disa_perplexa	GT	1	1
Streptophyta	Liliopsida	Asparagales	Orchidaceae	Disa	Disa_pillansii	GT	1	1
Streptophyta	Liliopsida	Asparagales	Orchidaceae	Disa	Disa_polygonoides	GT	1	1
Streptophyta	Liliopsida	Asparagales	Orchidaceae	Disa	Disa_pulchra	GT	1	1
Streptophyta	Liliopsida	Asparagales	Orchidaceae	Disa	Disa_purpurascens	GT	1	1
Streptophyta	Liliopsida	Asparagales	Orchidaceae	Disa	Disa_pygmaea	GT	1	1
Streptophyta	Liliopsida	Asparagales	Orchidaceae	Disa	Disa_racemosa	GT	1	1
Streptophyta	Liliopsida	Asparagales	Orchidaceae	Disa	Disa_remota	GT	1	2
Streptophyta	Liliopsida	Asparagales	Orchidaceae	Disa	Disa_reticulata	GT	1	1
Streptophyta	Liliopsida	Asparagales	Orchidaceae	Disa	Disa_rhodantha	GT	1	1
Streptophyta	Liliopsida	Asparagales	Orchidaceae	Disa	Disa_richardiana	GT	1	1
Streptophyta	Liliopsida	Asparagales	Orchidaceae	Disa	Disa_robusta	GT	1	1
Streptophyta	Liliopsida	Asparagales	Orchidaceae	Disa	Disa_rosea	GT	1	1
Streptophyta	Liliopsida	Asparagales	Orchidaceae	Disa	Disa_rufescens	GT	1	1
Streptophyta	Liliopsida	Asparagales	Orchidaceae	Disa	Disa_sabulosa	GT	1	1
Streptophyta	Liliopsida	Asparagales	Orchidaceae	Disa	Disa_sagittalis	GT	1	1
Streptophyta	Liliopsida	Asparagales	Orchidaceae	Disa	Disa_salteri	GT	1	1
Streptophyta	Liliopsida	Asparagales	Orchidaceae	Disa	Disa_sanguinea	GT	1	1
Streptophyta	Liliopsida	Asparagales	Orchidaceae	Disa	Disa_sankeyi	GT	1	1
Streptophyta	Liliopsida	Asparagales	Orchidaceae	Disa	Disa_satyriopsis	GT	1	1
Streptophyta	Liliopsida	Asparagales	Orchidaceae	Disa	Disa_saxicola	GT	1	1
Streptophyta	Liliopsida	Asparagales	Orchidaceae	Disa	Disa_schizodioides	GT	1	1
Streptophyta	Liliopsida	Asparagales	Orchidaceae	Disa	Disa_schlechteriana	GT	1	1
Streptophyta	Liliopsida	Asparagales	Orchidaceae	Disa	Disa_scullyi	GT	1	1
Streptophyta	Liliopsida	Asparagales	Orchidaceae	Disa	Disa_similis	GT	1	1
Streptophyta	Liliopsida	Asparagales	Orchidaceae	Disa	Disa_spathulata	GT	1	1
Streptophyta	Liliopsida	Asparagales	Orchidaceae	Disa	Disa_stachyoides	GT	1	1
Streptophyta	Liliopsida	Asparagales	Orchidaceae	Disa	Disa_stairsii	GT	1	1
Streptophyta	Liliopsida	Asparagales	Orchidaceae	Disa	Disa_stricta	GT	1	1
Streptophyta	Liliopsida	Asparagales	Orchidaceae	Disa	Disa_subtenuicornis	GT	1	1
Streptophyta	Liliopsida	Asparagales	Orchidaceae	Disa	Disa_telipogonis	GT	1	1
Streptophyta	Liliopsida	Asparagales	Orchidaceae	Disa	Disa_tenella	GT	1	2
Streptophyta	Liliopsida	Asparagales	Orchidaceae	Disa	Disa_tenuifolia	GT	1	1
Streptophyta	Liliopsida	Asparagales	Orchidaceae	Disa	Disa_tenuis	GT	1	1
Streptophyta	Liliopsida	Asparagales	Orchidaceae	Disa	Disa_thodei	GT	1	1
Streptophyta	Liliopsida	Asparagales	Orchidaceae	Disa	Disa_triloba	GT	1	1
Streptophyta	Liliopsida	Asparagales	Orchidaceae	Disa	Disa_tripetaloides	GT	1	1
Streptophyta	Liliopsida	Asparagales	Orchidaceae	Disa	Disa_tysonii	GT	1	1
Streptophyta	Liliopsida	Asparagales	Orchidaceae	Disa	Disa_ukingensis	GT	1	1
Streptophyta	Liliopsida	Asparagales	Orchidaceae	Disa	Disa_uncinata	GT	1	1
Streptophyta	Liliopsida	Asparagales	Orchidaceae	Disa	Disa_uniflora	GT	1	1
Streptophyta	Liliopsida	Asparagales	Orchidaceae	Disa	Disa_vaginata	GT	1	1
Streptophyta	Liliopsida	Asparagales	Orchidaceae	Disa	Disa_vasselotii	GT	1	1
Streptophyta	Liliopsida	Asparagales	Orchidaceae	Disa	Disa_venosa	GT	1	1
Streptophyta	Liliopsida	Asparagales	Orchidaceae	Disa	Disa_venusta	GT	1	1
Streptophyta	Liliopsida	Asparagales	Orchidaceae	Disa	Disa_versicolor	GT	1	1
Streptophyta	Liliopsida	Asparagales	Orchidaceae	Disa	Disa_vigilans	GT	1	1
Streptophyta	Liliopsida	Asparagales	Orchidaceae	Disa	Disa_virginalis	GT	1	1
Streptophyta	Liliopsida	Asparagales	Orchidaceae	Disa	Disa_walleri	GT	1	1
Streptophyta	Liliopsida	Asparagales	Orchidaceae	Disa	Disa_woodii	GT	1	1
Streptophyta	Liliopsida	Asparagales	Orchidaceae	Disa	Disa_x_maculomarronina	GT	1	1
Streptophyta	Liliopsida	Asparagales	Orchidaceae	Disa	Disa_zimbabweensis	GT	1	1
Streptophyta	Liliopsida	Asparagales	Orchidaceae	Disa	Disa_zombica	GT	1	1
Streptophyta	Liliopsida	Asparagales	Orchidaceae	Disa	Disa_zuluensis	GT	1	1
Streptophyta	Liliopsida	Asparagales	Orchidaceae	Disperis	Disperis_capensis	GT	1	1
Streptophyta	Liliopsida	Asparagales	Orchidaceae	Disperis	Disperis_cucullata	GT	1	1
Streptophyta	Liliopsida	Asparagales	Orchidaceae	Disperis	Disperis_dicerochila	GT	1	1
Streptophyta	Liliopsida	Asparagales	Orchidaceae	Disperis	Disperis_stenoplectron	GT	1	1
Streptophyta	Liliopsida	Asparagales	Orchidaceae	Dracontia	Dracontia_montis-mortensis	GT	1	3
Streptophyta	Liliopsida	Asparagales	Orchidaceae	Dressleria	Dressleria_dilecta	GT	1	1
Streptophyta	Liliopsida	Asparagales	Orchidaceae	Dryadella	Dryadella_albicans	GT	1	1
Streptophyta	Liliopsida	Asparagales	Orchidaceae	Echinosepala	Echinosepala_aspasicensis	GT	1	2
Streptophyta	Liliopsida	Asparagales	Orchidaceae	Echinosepala	Echinosepala_pan	GT	1	1
Streptophyta	Liliopsida	Asparagales	Orchidaceae	Echinosepala	Echinosepala_sempergemmata	GT	1	2
Streptophyta	Liliopsida	Asparagales	Orchidaceae	Echinosepala	Echinosepala_shuarii	GT	1	1
Streptophyta	Liliopsida	Asparagales	Orchidaceae	Echinosepala	Echinosepala_sp._1_AK-2015	GT	1	1
Streptophyta	Liliopsida	Asparagales	Orchidaceae	Echinosepala	Echinosepala_sp._2_AK-2015	GT	1	1
Streptophyta	Liliopsida	Asparagales	Orchidaceae	Echinosepala	Echinosepala_sp._3_AK-2015	GT	1	1
Streptophyta	Liliopsida	Asparagales	Orchidaceae	Echinosepala	Echinosepala_stonei	GT	1	2
Streptophyta	Liliopsida	Asparagales	Orchidaceae	Embreea	Embreea_rodigasiana	GT	1	1
Streptophyta	Liliopsida	Asparagales	Orchidaceae	Encyclia	Encyclia_adenocaula	GT	1	1
Streptophyta	Liliopsida	Asparagales	Orchidaceae	Encyclia	Encyclia_alata	GT	1	1
Streptophyta	Liliopsida	Asparagales	Orchidaceae	Encyclia	Encyclia_andrichii	GT	1	1
Streptophyta	Liliopsida	Asparagales	Orchidaceae	Encyclia	Encyclia_argentinensis	GT	1	1
Streptophyta	Liliopsida	Asparagales	Orchidaceae	Encyclia	Encyclia_bracteata	GT	1	1
Streptophyta	Liliopsida	Asparagales	Orchidaceae	Encyclia	Encyclia_ivonae	GT	1	1
Streptophyta	Liliopsida	Asparagales	Orchidaceae	Encyclia	Encyclia_mooreana	GT	1	1
Streptophyta	Liliopsida	Asparagales	Orchidaceae	Encyclia	Encyclia_nematocaulon	GT	1	1
Streptophyta	Liliopsida	Asparagales	Orchidaceae	Encyclia	Encyclia_patens	GT	1	1
Streptophyta	Liliopsida	Asparagales	Orchidaceae	Encyclia	Encyclia_pauciflora	GT	1	1
Streptophyta	Liliopsida	Asparagales	Orchidaceae	Encyclia	Encyclia_pflanzii	GT	1	1
Streptophyta	Liliopsida	Asparagales	Orchidaceae	Encyclia	Encyclia_randii	GT	1	1
Streptophyta	Liliopsida	Asparagales	Orchidaceae	Encyclia	Encyclia_spatella	GT	1	1
Streptophyta	Liliopsida	Asparagales	Orchidaceae	Encyclia	Encyclia_spiritusanctensis	GT	1	1
Streptophyta	Liliopsida	Asparagales	Orchidaceae	Encyclia	Encyclia_thienii	GT	1	1
Streptophyta	Liliopsida	Asparagales	Orchidaceae	Encyclia	Encyclia_viridiflora	GT	1	1
Streptophyta	Liliopsida	Asparagales	Orchidaceae	Epipactis	Epipactis_atrorubens	GT	1	1
Streptophyta	Liliopsida	Asparagales	Orchidaceae	Epipactis	Epipactis_helleborine	GT	1	3
Streptophyta	Liliopsida	Asparagales	Orchidaceae	Epipactis	Epipactis_leptochila	GT	1	1
Streptophyta	Liliopsida	Asparagales	Orchidaceae	Epipactis	Epipactis_palustris	GT	1	2
Streptophyta	Liliopsida	Asparagales	Orchidaceae	Eriopsis	Eriopsis_rutidobulbon	GT	1	2
Streptophyta	Liliopsida	Asparagales	Orchidaceae	Eulophia	Eulophia_guineensis	GT	1	1
Streptophyta	Liliopsida	Asparagales	Orchidaceae	Galeandra	Galeandra_sp._SRR-2011	GT	1	1
Streptophyta	Liliopsida	Asparagales	Orchidaceae	Gastrodia	Gastrodia_pubilabiata	GT	1	1
Streptophyta	Liliopsida	Asparagales	Orchidaceae	Gongora	Gongora_amparoana	GT	1	1
Streptophyta	Liliopsida	Asparagales	Orchidaceae	Gongora	Gongora_armeniaca	GT	1	1
Streptophyta	Liliopsida	Asparagales	Orchidaceae	Gongora	Gongora_gratulabunda	GT	1	1
Streptophyta	Liliopsida	Asparagales	Orchidaceae	Gongora	Gongora_ilense	GT	1	1
Streptophyta	Liliopsida	Asparagales	Orchidaceae	Gongora	Gongora_sp._SRR-2011	GT	1	1
Streptophyta	Liliopsida	Asparagales	Orchidaceae	Gongora	Gongora_sphaerica	GT	1	1
Streptophyta	Liliopsida	Asparagales	Orchidaceae	Gymnadenia	Gymnadenia_conopsea	GT	1	2
Streptophyta	Liliopsida	Asparagales	Orchidaceae	Heterotaxis	Heterotaxis_equitans	GT	1	2
Streptophyta	Liliopsida	Asparagales	Orchidaceae	Heterotaxis	Heterotaxis_violaceopunctata	GT	1	1
Streptophyta	Liliopsida	Asparagales	Orchidaceae	Hexalectris	Hexalectris_arizonica	GT	1	10
Streptophyta	Liliopsida	Asparagales	Orchidaceae	Hexalectris	Hexalectris_colemanii	GT	0.92	23			1	1
Streptophyta	Liliopsida	Asparagales	Orchidaceae	Hexalectris	Hexalectris_parviflora	GT	1	10
Streptophyta	Liliopsida	Asparagales	Orchidaceae	Holcoglossum	Holcoglossum_kimballianum	GT	1	1
Streptophyta	Liliopsida	Asparagales	Orchidaceae	Holcoglossum	Holcoglossum_subulifolium	GT	1	1
Streptophyta	Liliopsida	Asparagales	Orchidaceae	Horichia	Horichia_dressleri	GT	1	1
Streptophyta	Liliopsida	Asparagales	Orchidaceae	Houlletia	Houlletia_sanderi	GT	1	1
Streptophyta	Liliopsida	Asparagales	Orchidaceae	Houlletia	Houlletia_wallisii	GT	1	1
Streptophyta	Liliopsida	Asparagales	Orchidaceae	Inti	Inti_bicallosa	GT	1	1
Streptophyta	Liliopsida	Asparagales	Orchidaceae	Jacquiniella	Jacquiniella_teretifolia	GT	1	1
Streptophyta	Liliopsida	Asparagales	Orchidaceae	Kefersteinia	Kefersteinia_sp._SRR-2011	GT	1	1
Streptophyta	Liliopsida	Asparagales	Orchidaceae	Kegeliella	Kegeliella_atropilosa	GT	1	1
Streptophyta	Liliopsida	Asparagales	Orchidaceae	Kegeliella	Kegeliella_kupperi	GT	1	1
Streptophyta	Liliopsida	Asparagales	Orchidaceae	Koellensteinia	Koellensteinia_altissima	GT	1	1
Streptophyta	Liliopsida	Asparagales	Orchidaceae	Lacaena	Lacaena_spectabilis	GT	1	1
Streptophyta	Liliopsida	Asparagales	Orchidaceae	Laelia	Laelia_albida	GT	1	1
Streptophyta	Liliopsida	Asparagales	Orchidaceae	Laelia	Laelia_anceps	GT	1	1
Streptophyta	Liliopsida	Asparagales	Orchidaceae	Laelia	Laelia_aurea	GT	1	1
Streptophyta	Liliopsida	Asparagales	Orchidaceae	Laelia	Laelia_autumnalis	GT	1	2
Streptophyta	Liliopsida	Asparagales	Orchidaceae	Laelia	Laelia_eyermaniana	GT	1	1
Streptophyta	Liliopsida	Asparagales	Orchidaceae	Laelia	Laelia_gouldiana	GT	1	1
Streptophyta	Liliopsida	Asparagales	Orchidaceae	Laelia	Laelia_halbingeriana	GT	1	1
Streptophyta	Liliopsida	Asparagales	Orchidaceae	Laelia	Laelia_lyonsii	GT	1	1
Streptophyta	Liliopsida	Asparagales	Orchidaceae	Laelia	Laelia_marginata	GT	1	8
Streptophyta	Liliopsida	Asparagales	Orchidaceae	Laelia	Laelia_rubescens	GT	1	1
Streptophyta	Liliopsida	Asparagales	Orchidaceae	Laelia	Laelia_speciosa	GT	1	1
Streptophyta	Liliopsida	Asparagales	Orchidaceae	Laelia	Laelia_splendida	GT	1	1
Streptophyta	Liliopsida	Asparagales	Orchidaceae	Laelia	Laelia_superbiens	GT	1	2
Streptophyta	Liliopsida	Asparagales	Orchidaceae	Laelia	Laelia_x_crawshayana	GT	1	1
Streptophyta	Liliopsida	Asparagales	Orchidaceae	Laelia	Laelia_x_oaxacana	GT	1	1
Streptophyta	Liliopsida	Asparagales	Orchidaceae	Lockhartia	Lockhartia_oerstedii	GT	1	1
Streptophyta	Liliopsida	Asparagales	Orchidaceae	Lueddemannia	Lueddemannia_pescatorei	GT	1	1
Streptophyta	Liliopsida	Asparagales	Orchidaceae	Luisia	Luisia_tristis	GT	1	1
Streptophyta	Liliopsida	Asparagales	Orchidaceae	Lycaste	Lycaste_cruenta	GT	1	1
Streptophyta	Liliopsida	Asparagales	Orchidaceae	Lycomormium	Lycomormium_fiskei	GT	1	1
Streptophyta	Liliopsida	Asparagales	Orchidaceae	Maxillaria	Maxillaria_aureoglobula	GT	1	1
Streptophyta	Liliopsida	Asparagales	Orchidaceae	Maxillaria	Maxillaria_calcarata	GT	1	1
Streptophyta	Liliopsida	Asparagales	Orchidaceae	Maxillaria	Maxillaria_cf._acutifolia_Giraldo_44	GT	1	1
Streptophyta	Liliopsida	Asparagales	Orchidaceae	Maxillaria	Maxillaria_cf._chacoensis_Arevalo_1094	GT	1	1
Streptophyta	Liliopsida	Asparagales	Orchidaceae	Maxillaria	Maxillaria_cf._chacoensis_Arevalo_961	GT	1	1
Streptophyta	Liliopsida	Asparagales	Orchidaceae	Maxillaria	Maxillaria_culebrica	GT	1	2
Streptophyta	Liliopsida	Asparagales	Orchidaceae	Maxillaria	Maxillaria_egertoniana	GT	1	1
Streptophyta	Liliopsida	Asparagales	Orchidaceae	Maxillaria	Maxillaria_richii	GT	1	1
Streptophyta	Liliopsida	Asparagales	Orchidaceae	Maxillaria	Maxillaria_rufescens	GT	1	1
Streptophyta	Liliopsida	Asparagales	Orchidaceae	Maxillaria	Maxillaria_schlimii	GT	1	1
Streptophyta	Liliopsida	Asparagales	Orchidaceae	Maxillaria	Maxillaria_umbratilis	GT	1	1
Streptophyta	Liliopsida	Asparagales	Orchidaceae	Miltonia	Miltonia_regnellii	GT	1	1
Streptophyta	Liliopsida	Asparagales	Orchidaceae	Muscarella	Muscarella_sp._1_AK5988	GT	1	1
Streptophyta	Liliopsida	Asparagales	Orchidaceae	Muscarella	Muscarella_sp._2_AK5989	GT	1	1
Streptophyta	Liliopsida	Asparagales	Orchidaceae	Myoxanthus	Myoxanthus_uncinatus	GT	1	1
Streptophyta	Liliopsida	Asparagales	Orchidaceae	Neofinetia	Neofinetia_falcata	GT	1	1
Streptophyta	Liliopsida	Asparagales	Orchidaceae	Neomoorea	Neomoorea_wallisii	GT	1	1
Streptophyta	Liliopsida	Asparagales	Orchidaceae	Neottia	Neottia_kiusiana	GT	1	1
Streptophyta	Liliopsida	Asparagales	Orchidaceae	Nervilia	Nervilia_nipponica	GT	1	3
Streptophyta	Liliopsida	Asparagales	Orchidaceae	Neuwiedia	Neuwiedia_borneensis	GT	1	1
Streptophyta	Liliopsida	Asparagales	Orchidaceae	Neuwiedia	Neuwiedia_veratrifolia	GT	1	1
Streptophyta	Liliopsida	Asparagales	Orchidaceae	Neuwiedia	Neuwiedia_zollingeri	GT	1	1
Streptophyta	Liliopsida	Asparagales	Orchidaceae	Oncidium	Oncidium_ornithorhynchum	GT	1	1
Streptophyta	Liliopsida	Asparagales	Orchidaceae	Ophrys	Ophrys_insectifera	GT	1	2
Streptophyta	Liliopsida	Asparagales	Orchidaceae	Orchidaceae_Incertae_sedis	Epidendroideae_sp._MMI-2017	GT	1	1
Streptophyta	Liliopsida	Asparagales	Orchidaceae	Orchidaceae_Incertae_sedis	Stanhopeinae_sp._1_SRR-2011	GT	1	1
Streptophyta	Liliopsida	Asparagales	Orchidaceae	Orchidaceae_Incertae_sedis	Zygopetalinae_sp._10_SRR-2011	GT	1	1
Streptophyta	Liliopsida	Asparagales	Orchidaceae	Orchidaceae_Incertae_sedis	Zygopetalinae_sp._2_SRR-2011	GT	1	1
Streptophyta	Liliopsida	Asparagales	Orchidaceae	Orchidaceae_Incertae_sedis	Zygopetalinae_sp._3_SRR-2011	GT	1	1
Streptophyta	Liliopsida	Asparagales	Orchidaceae	Orchidaceae_Incertae_sedis	Zygopetalinae_sp._4_SRR-2011	GT	1	1
[truncated: 9,666 more rows]

## Sheet: sequences
accession	species	# mismatches	mismatches (dots are maches)
	ITS4f primer sequence (reverse complement)		ACTTAAGCATATYAATAAGCG
	ITS4f2 primer sequence (reverse complement)		AYTTAAGCATATYAATAAGCG
KP099811	uncultured_Tetraselmis	0	.....................
HE610128	Scherffelia_dubia	0	.....................
HE610130	Tetraselmis_cordiformis	0	.....................
KJ756818	Tetraselmis_inconspicua	0	.....................
HE610131	Tetraselmis_marina	0	.....................
KC841952	Tetraselmis_sp._IOAC701S	0	.....................
KC841954	Tetraselmis_sp._IOAC702S	0	.....................
HE610129	Tetraselmis_striata	0	.....................
KC415759	Tetraselmis_suecica	0	.....................
FR865748	Chaetopeltis_orbicularis	0	.....................
LN913072	Dicranochaete_reniformis	0	.....................
LN913071	Dicranochaete_sp._1_LC-2015	0	.....................
KT693223	Koshicola_spirodelophila	0	.....................
HF920656	Aphanochaete_repens	0	.....................
HF920658	Aphanochaete_repens	0	.....................
HF920657	Aphanochaete_sp._CCAC_3490	0	.....................
HF920667	Caespitella_pascheri	0	.....................
LN870278	Barranca_multiflagellata	0	.....................
LN870279	Barranca_multiflagellata	0	.....................
HF920663	Chaetophora_elegans	0	.....................
FR865749	Chaetophora_incrassata	0	.....................
HF920673	Chaetophora_lobata	0	.....................
LN870282	Chaetophora_sp._BEA_0173B	0	.....................
HF920672	Chaetophora_sp._CCALA_839	0	.....................
HF920670	Draparnaldia_glomerata	0	.....................
HF920671	Draparnaldia_plumosa	0	.....................
HF920678	Stigeoclonium_elongatum	0	.....................
HE610124	Stigeoclonium_helveticum	0	.....................
HF920666	Stigeoclonium_nanum	0	.....................
HF920668	Stigeoclonium_sp._CCAC_1901	0	.....................
HF920677	Stigeoclonium_sp._CCAC_1904	0	.....................
HF920676	Stigeoclonium_sp._CCAC_2384	0	.....................
HF920675	Stigeoclonium_sp._CCAC_3493	0	.....................
HF920664	Stigeoclonium_subsecundum	0	.....................
HF920674	Stigeoclonium_subsecundum	0	.....................
HF920669	Stigeoclonium_tenue	0	.....................
HF920680	Stigeoclonium_tenue	0	.....................
HF920679	Stigeoclonium_variabile	0	.....................
HF920655	Schizomeris_leibleinii	0	.....................
HF920660	Uronema_gigas	0	.....................
HF920661	Uronema_minutum	0	.....................
HF920662	Uronema_sp._CCAC_3491	0	.....................
FR865743	Uronema_sp._CCAP_334/1	0	.....................
FR717536	Uronema_sp._CCAP_335/1B	0	.....................
FR717538	Uronema_sp._CCAP_384/1	2	.T............C......
HF920659	Uronema_trentonense	0	.....................
KU351659	Asteromonas_gracilis	0	.....................
KP204556	Chlamydomonadaceae_sp._MCWWS12	0	.....................
KP204558	Chlamydomonadaceae_sp._MCWWS14	0	.....................
KP204559	Chlamydomonadaceae_sp._MCWWS16	0	.....................
KP204560	Chlamydomonadaceae_sp._MCWWS17	0	.....................
KP204561	Chlamydomonadaceae_sp._MCWWS18	0	.....................
KP204562	Chlamydomonadaceae_sp._MCWWS20	0	.....................
KP204563	Chlamydomonadaceae_sp._MCWWS21	0	.....................
KP204564	Chlamydomonadaceae_sp._MCWWS22	0	.....................
KP204567	Chlamydomonadaceae_sp._MCWWS25	0	.....................
KP204568	Chlamydomonadaceae_sp._MCWWS26	0	.....................
KP204571	Chlamydomonadaceae_sp._MCWWS29	0	.....................
KP204550	Chlamydomonadaceae_sp._MCWWS3	0	.....................
KP204572	Chlamydomonadaceae_sp._MCWWS30	0	.....................
KP204577	Chlamydomonadaceae_sp._MCWWS35	0	.....................
KP204578	Chlamydomonadaceae_sp._MCWWS36	0	.....................
KP204552	Chlamydomonadaceae_sp._MCWWS6	0	.....................
KP204553	Chlamydomonadaceae_sp._MCWWS8	0	.....................
KP204554	Chlamydomonadaceae_sp._MCWWS9	0	.....................
FR865570	Chlamydomonas_applanata	0	.....................
FR865578	Chlamydomonas_applanata	0	.....................
FR865579	Chlamydomonas_applanata	0	.....................
FR865580	Chlamydomonas_applanata	0	.....................
FR865581	Chlamydomonas_applanata	0	.....................
FR865616	Chlamydomonas_applanata	0	.....................
FR865583	Chlamydomonas_asymmetrica	0	.....................
FR865607	Chlamydomonas_asymmetrica	0	.....................
LT594770	Chlamydomonas_asymmetrica	0	.....................
FR865613	Chlamydomonas_baca	0	.....................
FR865523	Chlamydomonas_debaryana	0	.....................
FR865593	Chlamydomonas_debaryana	0	.....................
FR865600	Chlamydomonas_debaryana	0	.....................
KJ210856	Chlamydomonas_debaryana	3	...............A.G..C
KT932961	Chlamydomonas_debaryana	5	..............TAGC.G.
LT594769	Chlamydomonas_debaryana	0	.....................
FR865582	Chlamydomonas_dorsoventralis	0	.....................
KU926335	Chlamydomonas_globosa	0	.....................
FR865584	Chlamydomonas_inflexa	0	.....................
FR865590	Chlamydomonas_leiostraca	0	.....................
FR865592	Chlamydomonas_mexicana	0	.....................
FR865601	Chlamydomonas_moewusii	0	.....................
GU117577	Chlamydomonas_nivalis	0	.....................
HQ404896	Chlamydomonas_primoveris	0	.....................
GU117580	Chlamydomonas_proboscigera	0	.....................
GU117581	Chlamydomonas_proboscigera	0	.....................
HQ404898	Chlamydomonas_pulsatilla	0	.....................
FR865611	Chlamydomonas_rapa	0	.....................
FR865575	Chlamydomonas_reinhardtii	0	.....................
FR865576	Chlamydomonas_reinhardtii	0	.....................
FR865586	Chlamydomonas_reinhardtii	0	.....................
FR865533	Chlamydomonas_sp._CCAP_11/138	0	.....................
FR865534	Chlamydomonas_sp._CCAP_11/139	0	.....................
FR865536	Chlamydomonas_sp._CCAP_11/141	0	.....................
FR865537	Chlamydomonas_sp._CCAP_11/142	0	.....................
FR865538	Chlamydomonas_sp._CCAP_11/143	0	.....................
FR865539	Chlamydomonas_sp._CCAP_11/144	0	.....................
FR865540	Chlamydomonas_sp._CCAP_11/145	0	.....................
FR865541	Chlamydomonas_sp._CCAP_11/146	0	.....................
FR865542	Chlamydomonas_sp._CCAP_11/147	0	.....................
FR865543	Chlamydomonas_sp._CCAP_11/148	0	.....................
FR865545	Chlamydomonas_sp._CCAP_11/150	0	.....................
FR865546	Chlamydomonas_sp._CCAP_11/151	0	.....................
FR865548	Chlamydomonas_sp._CCAP_11/153	0	.....................
FR865551	Chlamydomonas_sp._CCAP_11/157	0	.....................
FR865552	Chlamydomonas_sp._CCAP_11/158	0	.....................
FR865553	Chlamydomonas_sp._CCAP_11/159	0	.....................
FR865555	Chlamydomonas_sp._CCAP_11/161	0	.....................
FR865556	Chlamydomonas_sp._CCAP_11/162	0	.....................
FR865558	Chlamydomonas_sp._CCAP_11/164	0	.....................
FR865559	Chlamydomonas_sp._CCAP_11/165	0	.....................
FR865561	Chlamydomonas_sp._CCAP_11/167	0	.....................
FR865562	Chlamydomonas_sp._CCAP_11/168	0	.....................
FR865563	Chlamydomonas_sp._CCAP_11/169	0	.....................
AY731085	Chlamydomonas_sp._ICE-L	0	.....................
AY731084	Chlamydomonas_sp._ICE-W	0	.....................
JX911252	Chlamydomonas_sp._KIOST-1	0	.....................
KM061441	Chlamydomonas_sp._KU101	0	.....................
KM061442	Chlamydomonas_sp._KU102	0	.....................
KM061443	Chlamydomonas_sp._KU103	0	.....................
KM061444	Chlamydomonas_sp._KU104	0	.....................
KM061445	Chlamydomonas_sp._KU105	0	.....................
KM061446	Chlamydomonas_sp._KU106	0	.....................
KM061447	Chlamydomonas_sp._KU107	0	.....................
KM061448	Chlamydomonas_sp._KU108	0	.....................
KY873609	Chlamydomonas_sp._MACC_388	6	.A...TA......TC...A..
KY873610	Chlamydomonas_sp._MACC_395	1	..................A..
MF162271	Chlamydomonas_sp._TRC-1	4	..............TA.CC..
KP313859	Chlamydomonas_sp._UWO_241	0	.....................
FR865573	Chlamydomonas_sphagnophila	0	.....................
GU117579	Chlamydomonas_splendida	0	.....................
HQ404864	Chloromonas_alpina	0	.....................
HQ404865	Chloromonas_alpina	0	.....................
HQ404866	Chloromonas_brevispina	0	.....................
HQ404897	Chloromonas_fonticola	0	.....................
HQ404868	Chloromonas_insignis	0	.....................
HQ404862	Chloromonas_nivalis	0	.....................
FR865585	Chloromonas_perforata	0	.....................
HQ404880	Chloromonas_pichinchae	0	.....................
HQ404889	Chloromonas_pichinchae	0	.....................
HQ404878	Chloromonas_reticulata	0	.....................
HQ404885	Chloromonas_reticulata	0	.....................
HQ404900	Chloromonas_reticulata	0	.....................
HQ404863	Chloromonas_rostafinskii	0	.....................
HQ404883	Chloromonas_sp._CCCryo207-05	0	.....................
HQ404887	Chloromonas_sp._CCCryo244-06	0	.....................
HQ404888	Chloromonas_sp._CCCryo257-06	0	.....................
HQ404890	Chloromonas_sp._CCCryo273-06	0	.....................
HQ404869	Chloromonas_typhlos	0	.....................
HQ404886	Chloromonas_typhlos	0	.....................
FR865604	Lobochlamys_segnis	0	.....................
KT274016	Borodinellopsis_texensis	0	.....................
JX088396	Chlamydomonadales_sp._AB-2012	0	.....................
HQ404867	Ploeotila_sp._CCCryo086-99	0	.....................
FR865591	Chlorococcum_sp._CCAP_11/52	0	.....................
KY873612	Chlorococcum_sp._MACC_693	0	.....................
KY873614	Chlorococcum_sp._MACC_786	0	.....................
KY873615	Chlorococcum_sp._MACC_807	1	..................A..
KJ756819	Dunaliella_primolecta	0	.....................
KU641615	Dunaliella_pseudosalina	0	.....................
EF473732	Dunaliella_salina	0	.....................
EF473741	Dunaliella_salina	0	.....................
EF473744	Dunaliella_salina	0	.....................
EF473746	Dunaliella_salina	0	.....................
KU641617	Dunaliella_salina	0	.....................
EF473730	Dunaliella_tertiolecta	0	.....................
EF473738	Dunaliella_tertiolecta	0	.....................
EF473742	Dunaliella_tertiolecta	0	.....................
EF473748	Dunaliella_tertiolecta	0	.....................
KC415758	Dunaliella_tertiolecta	0	.....................
KJ756820	Dunaliella_tertiolecta	0	.....................
KY364700	Haematococcus_lacustris	0	.....................
LC013980	Haematococcus_lacustris	0	.....................
FR865741	Gonium_pectorale	1	..............C......
LC075797	Yamagishiella_sp._1403259_D_Yamagishiella	1	..............T......
FR865758	Carteria_eugametos	0	.....................
FR865759	Carteria_incisa	0	.....................
HQ404899	Chlamydocapsa_ampla	0	.....................
KX180161	Desmococcus_olivaceus	1	....................C
FR865740	Gloeocystis_polydermatica	0	.....................
MG266123	uncultured_Chlorophyceae	0	.....................
MG266124	uncultured_Chlorophyceae	0	.....................
KM514810	Pleurastrum_insigne	0	.....................
KM514812	Pleurastrum_insigne	0	.....................
HQ404881	Pleurastrum_sp._CCCryo_194-04	0	.....................
HQ404882	Pleurastrum_sp._CCCryo_205-05	0	.....................
HE610122	Spermatozopsis_exsultans	0	.....................
X69488	Spermatozopsis_similis	0	.....................
MG266120	uncultured_Oedogoniales	0	.....................
MG266121	uncultured_Oedogoniales	0	.....................
MG266122	uncultured_Oedogoniales	0	.....................
KY575148	Oedogonium_subplagiostomum	6	...........AG..C.GAG.
GU827478	Chromochloris_zofingiensis	0	.....................
HE610123	Hydrodictyon_reticulatum	0	.....................
KC145471	Parapediastrum_biradiatum	4	.............C..TG.T.
KJ451397	Mychonastes_homosphaera	5	..............TA..CGC
KM893429	Neochloris_sp._AY2	0	.....................
AB917132	Neochloris_sp._GM4e	0	.....................
JQ043184	Asterarcys_quadricellulare	0	.....................
KM893430	Asterarcys_sp._MS3	1	................T....
AB917138	Desmodesmus_armatus	1	..............C......
FR865704	Desmodesmus_brasiliensis	1	..............C......
FR865707	Desmodesmus_brasiliensis	2	..............C.T....
FR865708	Desmodesmus_brasiliensis	1	..............C......
FR865700	Desmodesmus_intermedius	1	..............C......
FR865701	Desmodesmus_intermedius	1	..............C......
FR865702	Desmodesmus_intermedius	1	..............C......
FR865703	Desmodesmus_intermedius	1	..............C......
AB917139	Desmodesmus_pannonicus	1	..............C......
FR865709	Desmodesmus_pannonicus	1	..............C......
FR865710	Desmodesmus_pannonicus	1	..............C......
FR865711	Desmodesmus_pannonicus	1	..............C......
FR865712	Desmodesmus_pannonicus	1	..............C......
AF349725	Desmodesmus_pirkollei	7	..............CATCAAT
JQ973888	Desmodesmus_sp._A8	1	..............C......
JX046421	Desmodesmus_sp._FG	1	..............C......
AB917128	Desmodesmus_sp._GM4a	1	..............C......
AB917136	Desmodesmus_sp._GM4i	1	..............C......
AB917137	Desmodesmus_sp._GM4j	1	..............C......
JX046420	Desmodesmus_sp._M1-20	1	..............C......
KY873611	Desmodesmus_sp._MACC_485	1	..............C......
KY873613	Desmodesmus_sp._MACC_783	1	..............C......
AB917103	Pectinodesmus_sp._GB1j	0	.....................
FR865727	Scenedesmus_armatus	1	..............C......
KT778084	Scenedesmus_quadricauda	1	..............C......
KT778107	Scenedesmus_quadricauda	0	.....................
KT778093	Scenedesmus_sp._SM15-1	0	.....................
KT778097	Scenedesmus_sp._SM8_2	0	.....................
JQ082320	Tetradesmus_nygaardii	0	.....................
KT778104	Tetradesmus_obliquus	0	.....................
KT778106	Tetradesmus_obliquus	0	.....................
KT778108	Tetradesmus_obliquus	0	.....................
KT778109	Tetradesmus_obliquus	0	.....................
KT818720	Tetradesmus_obliquus	0	.....................
JQ082326	Tetradesmus_reginae	0	.....................
AB917116	Tetranephris_brasiliensis	3	..............T....TC
AB917119	Tetranephris_brasiliensis	3	..............T....TC
JX046432	Ankistrodesmus_sp._LP	0	.....................
JX046426	Ankistrodesmus_sp._SP2-15	2	...................TC
AB917131	Nephrochlamys_subsolitaria	0	.....................
JX096945	Raphidocelis_sp._C1D	3	..............T....TC
AB917129	Selenastraceae_sp._GM4b	2	...................TC
HF920665	Fritschiella_tuberosa	0	.....................
KU641127	Chlorella-like_algae	0	.....................
JX046423	Chlorophyta_sp._SP2-3	0	.....................
HE610139	prasinophyte_sp._CCMP1205	1	..............C......
KT390079	prasinophyte_sp._CCMP1205	1	..............C......
KT390080	prasinophyte_sp._CCMP1205	1	..............C......
KT390101	prasinophyte_sp._CCMP1205	1	..............C......
KT390105	prasinophyte_sp._CCMP1205	1	..............C......
KT390106	prasinophyte_sp._CCMP1205	1	..............C......
KT390107	prasinophyte_sp._CCMP1205	1	..............C......
KT390108	prasinophyte_sp._CCMP1205	1	..............C......
KT390109	prasinophyte_sp._CCMP1205	1	..............C......
KT390110	prasinophyte_sp._CCMP1205	1	..............C......
KT390111	prasinophyte_sp._CCMP1205	1	..............C......
KT390112	prasinophyte_sp._CCMP1205	1	..............C......
KT390113	prasinophyte_sp._CCMP1205	1	..............C......
KT390114	prasinophyte_sp._CCMP1205	1	..............C......
KT390116	prasinophyte_sp._CCMP1205	1	..............C......
KT390117	prasinophyte_sp._CCMP1205	1	..............C......
KT390119	prasinophyte_sp._CCMP1205	1	..............C......
KT390120	prasinophyte_sp._CCMP1205	1	..............C......
KT390121	prasinophyte_sp._CCMP1205	1	..............C......
KT390122	prasinophyte_sp._CCMP1205	1	..............C......
KT390123	prasinophyte_sp._CCMP1205	1	..............C......
KT390124	prasinophyte_sp._CCMP1205	1	..............C......
KT390125	prasinophyte_sp._CCMP1205	1	..............C......
KT390126	prasinophyte_sp._CCMP1205	1	..............C......
KT390127	prasinophyte_sp._CCMP1205	1	..............C......
KT390128	prasinophyte_sp._CCMP1205	1	..............C......
KT390129	prasinophyte_sp._CCMP1205	1	..............C......
KT390131	prasinophyte_sp._CCMP1205	1	..............C......
KT390133	prasinophyte_sp._CCMP1205	1	..............C......
KT390134	prasinophyte_sp._CCMP1205	1	..............C......
KT390135	prasinophyte_sp._CCMP1205	1	..............C......
KT390137	prasinophyte_sp._CCMP1205	1	..............C......
KT390138	prasinophyte_sp._CCMP1205	1	..............C......
KT390145	prasinophyte_sp._CCMP1205	1	..............C......
FJ032691	uncultured_prasinophyte	2	.T............C......
FJ032693	uncultured_prasinophyte	2	.T............C......
FJ032695	uncultured_prasinophyte	2	.T............C......
HE610138	Picocystis_salinarum	1	..............C......
HE610140	Pycnococcus_provasolii	2	.T............T......
HE610141	Prasinococcus_capsulatus	2	.T............C......
HE610143	Prasinoderma_coloniale	2	.T............C......
HE610151	Cymbomonas_tetramitiformis	2	.T............C......
KT390104	Cymbomonas_tetramitiformis	2	.T............C......
HE610153	Pyramimonas_olivacea	2	.T............C......
HE610154	Pyramimonas_parkeae	2	.T............C......
HE610152	Pyramimonas_tetrarhynchus	2	.T............C......
HE610148	Crustomastix_stigmatica	2	.T............C......
HE610149	Dolichomastix_tenuilepis	1	..............C......
JX625115	Bathycoccus_prasinos	2	.T............C......
KF501037	Bathycoccus_prasinos	2	.T............C......
KT390052	Bathycoccus_prasinos	2	.T............C......
KT860591	Bathycoccus_prasinos	2	.T............C......
KT860592	Bathycoccus_prasinos	2	.T............C......
KT860593	Bathycoccus_prasinos	2	.T............C......
KT860594	Bathycoccus_prasinos	2	.T............C......
KT860595	Bathycoccus_prasinos	2	.T............C......
KT860596	Bathycoccus_prasinos	2	.T............C......
KT860597	Bathycoccus_prasinos	2	.T............C......
KT860598	Bathycoccus_prasinos	2	.T............C......
KT860599	Bathycoccus_prasinos	2	.T............C......
KT860600	Bathycoccus_prasinos	2	.T............C......
KT860601	Bathycoccus_prasinos	2	.T............C......
KT878714	Bathycoccus_prasinos	2	.T............C......
KY368634	Bathycoccus_prasinos	2	.T............C......
KY368635	Bathycoccus_prasinos	2	.T............C......
KY368636	Bathycoccus_prasinos	2	.T............C......
KY368637	Bathycoccus_prasinos	2	.T............C......
KY368638	Bathycoccus_prasinos	2	.T............C......
KY382363	Bathycoccus_prasinos	2	.T............C......
KY382364	Bathycoccus_prasinos	2	.T............C......
KY382370	Bathycoccus_prasinos	2	.T............C......
KY382373	Bathycoccus_prasinos	2	.T............C......
KY382374	Bathycoccus_prasinos	2	.T............C......
KY382375	Bathycoccus_prasinos	2	.T............C......
KY382376	Bathycoccus_prasinos	2	.T............C......
KY382377	Bathycoccus_prasinos	2	.T............C......
KY382378	Bathycoccus_prasinos	2	.T............C......
KY382379	Bathycoccus_prasinos	2	.T............C......
KY382380	Bathycoccus_prasinos	2	.T............C......
KY382381	Bathycoccus_prasinos	2	.T............Y......
KY382382	Bathycoccus_prasinos	2	.T............C......
KY382383	Bathycoccus_prasinos	2	.T............C......
KY563783	Bathycoccus_prasinos	2	.T............C......
KY563784	Bathycoccus_prasinos	2	.T............C......
KT389863	Ostreococcus_'lucimarinus'	2	.T............C......
KT389882	Ostreococcus_'lucimarinus'	2	.T............C......
KT390036	Ostreococcus_'lucimarinus'	2	.T............C......
KT390041	Ostreococcus_'lucimarinus'	2	.T............C......
KT390044	Ostreococcus_'lucimarinus'	2	.T............C......
KT390056	Ostreococcus_'lucimarinus'	2	.T............C......
KT390060	Ostreococcus_'lucimarinus'	2	.T............C......
KT390064	Ostreococcus_'lucimarinus'	2	.T............C......
KT390065	Ostreococcus_'lucimarinus'	2	.T............C......
KT390068	Ostreococcus_'lucimarinus'	2	.T............C......
KT390074	Ostreococcus_'lucimarinus'	2	.T............C......
KT390077	Ostreococcus_'lucimarinus'	2	.T............C......
KT390086	Ostreococcus_'lucimarinus'	2	.T............C......
KT390115	Ostreococcus_'lucimarinus'	2	.T............C......
KT390143	Ostreococcus_'lucimarinus'	2	.T............C......
KT390146	Ostreococcus_'lucimarinus'	2	.T............C......
KY368617	Ostreococcus_'lucimarinus'	2	.T............C......
KY368618	Ostreococcus_'lucimarinus'	2	.T............C......
KY368619	Ostreococcus_'lucimarinus'	2	.T............C......
KY368620	Ostreococcus_'lucimarinus'	2	.T............C......
KY368621	Ostreococcus_'lucimarinus'	2	.T............C......
KY368622	Ostreococcus_'lucimarinus'	2	.T............C......
KY368623	Ostreococcus_'lucimarinus'	2	.T............C......
KY368624	Ostreococcus_'lucimarinus'	2	.T............C......
KY368625	Ostreococcus_'lucimarinus'	2	.T............C......
KY368626	Ostreococcus_'lucimarinus'	2	.T............C......
KY368627	Ostreococcus_'lucimarinus'	2	.T............C......
KY368628	Ostreococcus_'lucimarinus'	2	.T............C......
KY368629	Ostreococcus_'lucimarinus'	2	.T............C......
KY368630	Ostreococcus_'lucimarinus'	2	.T............C......
KY368631	Ostreococcus_'lucimarinus'	2	.T............C......
KY368632	Ostreococcus_'lucimarinus'	2	.T............C......
KY368633	Ostreococcus_'lucimarinus'	2	.T............C......
KY382365	Ostreococcus_'lucimarinus'	2	.T............C......
KY382371	Ostreococcus_'lucimarinus'	2	.T............C......
KY382372	Ostreococcus_'lucimarinus'	2	.T............C......
JN862902	Ostreococcus_sp._BCC5000	2	.T............C......
JN862916	Ostreococcus_sp._BCC69000	2	.T............C......
HE610150	Mantoniella_squamata	2	.T............C......
KT390042	Mantoniella_squamata	2	.T............C......
KT390139	Mantoniella_squamata	2	.T............C......
KT390141	Mantoniella_squamata	3	.TC...........C......
KT390142	Mantoniella_squamata	2	.T............C......
KT390144	Mantoniella_squamata	3	.T............C....T.
KT390048	Micromonas_commoda	2	.T............C......
KU612123	Micromonas_commoda	2	.T............C......
KF501031	Micromonas_pusilla	2	.T............C......
KY563781	Micromonas_sp._HM10	2	.T............C......
KY563782	Micromonas_sp._HM3	2	.T............C......
KY563776	Micromonas_sp._HM6	2	.T............C......
KY563779	Micromonas_sp._HM7	2	.T............C......
KY563780	Micromonas_sp._KM12	2	.T............C......
KY563777	Micromonas_sp._KM4	2	.T............C......
KY563778	Micromonas_sp._KM5	2	.T............C......
KT390049	Micromonas_sp._RCC300	2	.T............C......
KT390069	Micromonas_sp._RCC300	2	.T............C......
KT390073	Micromonas_sp._RCC301	2	.T............C......
KT390078	Micromonas_sp._RCC302	2	.T............C......
KT390084	Micromonas_sp._RCC303	2	.T............C......
KT390066	Micromonas_sp._RCC304	2	.T............C......
KT390085	Micromonas_sp._RCC304	2	.T............C......
KT390045	Micromonas_sp._RCC305	2	.T............C......
KT390038	Micromonas_sp._RCC306	2	.T............C......
KP099866	uncultured_Bathycoccaceae	2	.T............C......
KP099901	uncultured_Bathycoccaceae	2	.T............C......
KP099822	uncultured_Mamiellales	2	.T............C......
KP099823	uncultured_Mamiellales	2	.T............C......
KP099835	uncultured_Mamiellales	2	.T............C......
KP099836	uncultured_Mamiellales	2	.T............C......
KP099838	uncultured_Mamiellales	2	.T............C......
KP099841	uncultured_Mamiellales	2	.T............C......
KP099842	uncultured_Mamiellales	2	.T............C......
KP099843	uncultured_Mamiellales	2	.T............C......
KP099848	uncultured_Mamiellales	2	.T............C......
KP099854	uncultured_Mamiellales	2	.T............C......
KP099858	uncultured_Mamiellales	2	.T............C......
KP099862	uncultured_Mamiellales	2	.T............C......
KP099864	uncultured_Mamiellales	2	.T............C......
KP099865	uncultured_Mamiellales	2	.T............C......
KP099872	uncultured_Mamiellales	2	.T............C......
KP099880	uncultured_Mamiellales	2	.T............C......
KP099881	uncultured_Mamiellales	2	.T............C......
KP099888	uncultured_Mamiellales	2	.T............C......
KP099893	uncultured_Mamiellales	2	.T............C......
KP099897	uncultured_Mamiellales	2	.T............C......
KP099900	uncultured_Mamiellales	2	.T............C......
KP099805	uncultured_Micromonas	2	.T............C......
KP099837	uncultured_Micromonas	2	.T............C......
KP099839	uncultured_Micromonas	2	.T............C......
KP099840	uncultured_Micromonas	2	.T............C......
KP099857	uncultured_Micromonas	2	.T............C......
KP099861	uncultured_Micromonas	2	.T............C......
KP099867	uncultured_Micromonas	2	.T............C......
KP099870	uncultured_Micromonas	2	.T............C......
KP099873	uncultured_Micromonas	2	.T............C......
KP099832	uncultured_Ostreococcus	2	.T............C......
KP099845	uncultured_Ostreococcus	2	.T............C......
KP099846	uncultured_Ostreococcus	2	.T............C......
KP099874	uncultured_Ostreococcus	2	.T............C......
KP099884	uncultured_Ostreococcus	2	.T............C......
HE610147	Monomastix_sp._M0722	2	.T............C......
HE610145	Nephroselmis_astigmatica	2	.T............C......
HE610146	Nephroselmis_olivacea	2	.T............C......
HE610144	Nephroselmis_pyriformis	2	.T............C......
FR865650	Nephroselmis_rotunda	4	TT.A..........C......
FR865651	Nephroselmis_rotunda	2	.T............C......
KU978910	Nephroselmis_viridis	2	.T............C......
HE610137	Marsupiomonas_pelliculata	0	.....................
HE610132	Pedinomonas_minor	0	.....................
HE610135	Pedinomonas_sp._M2079/1	0	.....................
HE610133	Pedinomonas_sp._UTEX_'LB_1027'	0	.....................
HE610134	Pedinomonas_tuberculata	0	.....................
KC416206	Auxenochlorella_pyrenoidosa	0	.....................
KM514815	Auxenochlorella_pyrenoidosa	0	.....................
KM514816	Auxenochlorella_pyrenoidosa	3	CT.G.................
KM514825	Auxenochlorella_pyrenoidosa	0	.....................
KM514826	Auxenochlorella_pyrenoidosa	0	.....................
KM514828	Auxenochlorella_pyrenoidosa	0	.....................
KM514829	Auxenochlorella_pyrenoidosa	0	.....................
KM514832	Auxenochlorella_pyrenoidosa	0	.....................
KM514833	Auxenochlorella_pyrenoidosa	0	.....................
KM514834	Auxenochlorella_pyrenoidosa	0	.....................
KM514841	Auxenochlorella_pyrenoidosa	0	.....................
KM514842	Auxenochlorella_pyrenoidosa	0	.....................
KM514843	Auxenochlorella_pyrenoidosa	0	.....................
KM514844	Auxenochlorella_pyrenoidosa	0	.....................
KM514847	Auxenochlorella_pyrenoidosa	0	.....................
KM514848	Auxenochlorella_pyrenoidosa	0	.....................
KM514849	Auxenochlorella_pyrenoidosa	0	.....................
KJ676106	Chlorella_parva	0	.....................
JX014220	Chlorella_sorokiniana	0	.....................
KC416207	Chlorella_sorokiniana	0	.....................
KJ676113	Chlorella_sorokiniana	0	.....................
KM514806	Chlorella_sorokiniana	1	..............C......
KM514835	Chlorella_sorokiniana	0	.....................
KM514855	Chlorella_sorokiniana	0	.....................
KM514856	Chlorella_sorokiniana	0	.....................
KM514857	Chlorella_sorokiniana	0	.....................
KM514858	Chlorella_sorokiniana	0	.....................
KM514859	Chlorella_sorokiniana	0	.....................
KT778120	Chlorella_sorokiniana	0	.....................
KY814693	Chlorella_sp.	0	.....................
KF998566	Chlorella_sp._'South_China_Sea'	0	.....................
KY645969	Chlorella_sp._FI07	0	.....................
KY655013	Chlorella_sp._FI20	0	.....................
JQ315187	Chlorella_sp._GTD8A1	0	.....................
KM514836	Chlorella_sp._NUA-2014-2	1	..............T......
KM514837	Chlorella_sp._NUA-2014-2	1	..............T......
KM514805	Chlorella_sp._NUA-2014-3	0	.....................
KM514807	Chlorella_sp._NUA-2014-3	0	.....................
KM514808	Chlorella_sp._NUA-2014-3	0	.....................
KM514811	Chlorella_sp._NUA-2014-3	0	.....................
KM514813	Chlorella_sp._NUA-2014-3	0	.....................
KM514814	Chlorella_sp._NUA-2014-3	0	.....................
KM514820	Chlorella_sp._NUA-2014-3	0	.....................
KM514822	Chlorella_sp._NUA-2014-3	0	.....................
KM514823	Chlorella_sp._NUA-2014-3	0	.....................
KM514824	Chlorella_sp._NUA-2014-3	0	.....................
KM514827	Chlorella_sp._NUA-2014-3	0	.....................
KM514852	Chlorella_sp._NUA-2014-3	0	.....................
KM514853	Chlorella_sp._NUA-2014-3	0	.....................
KM514854	Chlorella_sp._NUA-2014-3	0	.....................
KM514860	Chlorella_sp._NUA-2014-3	0	.....................
AB236862	Chlorella_variabilis	5	................CGATA
AB437257	Chlorella_variabilis	5	................CGATA
AB237642	Chlorella_vulgaris	0	.....................
AY948419	Chlorella_vulgaris	0	.....................
KF809716	Chlorella_vulgaris	4	..............TA..C.C
KJ676103	Chlorella_vulgaris	0	.....................
KT778121	Chlorella_vulgaris	0	.....................
KT778122	Chlorella_vulgaris	0	.....................
LC075794	Chlorellaceae_sp._140319_Didinium-alga_P	0	.....................
KP204548	Chlorellaceae_sp._MCWWS1	0	.....................
KP204549	Chlorellaceae_sp._MCWWS2	0	.....................
KP204566	Chlorellaceae_sp._MCWWS24	0	.....................
KP204569	Chlorellaceae_sp._MCWWS27	0	.....................
KP204570	Chlorellaceae_sp._MCWWS28	0	.....................
KP204573	Chlorellaceae_sp._MCWWS31	0	.....................
KP204574	Chlorellaceae_sp._MCWWS32	0	.....................
KP204551	Chlorellaceae_sp._MCWWS4	0	.....................
KP204584	Chlorellaceae_sp._MCWWW6	0	.....................
KP204585	Chlorellaceae_sp._MCWWW7	0	.....................
KP204586	Chlorellaceae_sp._MCWWW8	0	.....................
KP204587	Chlorellaceae_sp._MCWWW9	1	....................T
KM116463	Chloroidium_angustoellipsoideum	3	..............G.CG...
FR865676	Chloroidium_saccharophilum	0	.....................
KM514817	Chloroidium_saccharophilum	0	.....................
KM514818	Chloroidium_saccharophilum	0	.....................
KM514819	Chloroidium_saccharophilum	0	.....................
KM514821	Chloroidium_saccharophilum	0	.....................
KM514838	Chloroidium_saccharophilum	0	.....................
KM514839	Chloroidium_saccharophilum	0	.....................
KM514845	Chloroidium_saccharophilum	0	.....................
KX525236	Chloroidium_saccharophilum	0	.....................
GQ477058	Compactochlorella_dohrmannii	0	.....................
GQ477061	Kalenjinia_gelatinosa	2	CT...................
KT119889	Lobosphaera_sp._K-1	1	..............C......
KM020037	Marvania_geminata	6	............GG..G.TAC
KM020038	Marvania_geminata	0	.....................
GQ477059	Masaia_oloidia	1	.A...................
FR865692	Micractinium_pusillum	0	.....................
AB437244	Micractinium_reisseri	0	.....................
AB506070	Micractinium_reisseri	0	.....................
AB506071	Micractinium_reisseri	0	.....................
KP204588	Micractinium_sp._MCWWW10	0	.....................
KP204589	Micractinium_sp._MCWWW11	0	.....................
KP204590	Micractinium_sp._MCWWW12	0	.....................
KP204593	Micractinium_sp._MCWWW15	0	.....................
KP204594	Micractinium_sp._MCWWW16	0	.....................
KP204596	Micractinium_sp._MCWWW18	0	.....................
KP204597	Micractinium_sp._MCWWW19	0	.....................
KP204581	Micractinium_sp._MCWWW3	0	.....................
KP204582	Micractinium_sp._MCWWW4	0	.....................
KP204583	Micractinium_sp._MCWWW5	0	.....................
HG515045	Prototheca_blaschkeae	0	.....................
MF163495	Prototheca_ulmea	0	.....................
MF163497	Prototheca_ulmea	0	.....................
KX828712	Prototheca_wickerhamii	0	.....................
MF163503	Prototheca_wickerhamii	0	.....................
FR848897	Prototheca_zopfii	0	.....................
FR848898	Prototheca_zopfii	0	.....................
D13340	Pseudochlorella_pringsheimii	0	.....................
D17810	Pseudochlorella_pringsheimii	0	.....................
KY364701	Pseudochlorella_pringsheimii	0	.....................
FR865753	Pseudochlorella_signiensis	0	.....................
KM116464	Pseudochlorella_signiensis	0	.....................
KM116465	Pseudochlorella_signiensis	0	.....................
FR865655	Parachlorella_kessleri	0	.....................
KJ676116	Parachlorella_kessleri	0	.....................
GQ502287	Parachlorella_sp._CCAP_206/1	5	..............C.TGAT.
HE610127	Eremosphaera_viridis	0	.....................
HQ404870	Coenochloris_signiensis	0	.....................
HQ404871	Coenochloris_signiensis	0	.....................
HQ404872	Coenochloris_sp._CCCryo137-01	0	.....................
HQ404873	Coenochloris_sp._CCCryo138-01	0	.....................
HQ404874	Coenochloris_sp._CCCryo142-01	0	.....................
HQ404875	Coenochloris_sp._CCCryo145-01	0	.....................
HQ404876	Coenochloris_sp._CCCryo147-01	0	.....................
HQ404877	Coenochloris_sp._CCCryo148-01	0	.....................
KY559106	Asterochloris_irregularis	0	.....................
KY559161	Asterochloris_irregularis	0	.....................
KT215301	Asterochloris_sp._DrostorpA2	0	.....................
KT215302	Asterochloris_sp._DrostorpA3	0	.....................
KT215303	Asterochloris_sp._DrostorpD4	0	.....................
KT215304	Asterochloris_sp._DrostorpD5	0	.....................
KT215305	Asterochloris_sp._DrostorpD6	0	.....................
KT215306	Asterochloris_sp._GossenheimA1	0	.....................
KT215307	Asterochloris_sp._GossenheimA2	0	.....................
[truncated: 22,452 more rows]
