# Supplementary material for: The Endophytic Mycobiome of European Ash and Sycamore Maple Leaves – Geographic Patterns, Host Specificity and Influence of Ash Dieback
Source: Front Microbiol. 2018 Oct 24;9:2345. doi: 10.3389/fmicb.2018.02345 (PMC6207852; doi:10.3389/fmicb.2018.02345)
Supplement: Supplementary file 4 [file Table_4.xlsx]

## Sheet: species
Supplementary Table File 4: List of isolates that were used for the assembly of the mock communities.								days in liquid culture	expected frequency (qPCR) 2		Genbank accession
#	phylum	class	order	family	genus	species	isolation source		mean	std. dev.
1	Basidiomycota	Agaricomycetes	Agaricales	Cortinariaceae	Hebeloma	Hebeloma crustiliniforme	root from mixed Picea mariana, P. glauca, Pinus contorta, Populus woods (UAMH 5460)	21	0.0172661	0.00257663	MH931275
2	Basidiomycota	Agaricomycetes	Boletales	Coniophoraceae	Coniophora	Coniophora puteana	dead wood	13	0.0453614	0.00154189	MH931268
3	Basidiomycota	Agaricomycetes	Polyporales	Coriolaceae	Fomitopsis	Fomitopsis pinicola	dead wood	12	0.0442025	0.00212619	MH931272
4	Basidiomycota	Agaricomycetes	Russulales	Bondarzewiaceae	Heterobasidion	Heterobasidion annosum	fruiting body	11	0.0565739	0.00684583	MH931274
5	Basidiomycota	Cystobasidiomycetes	Erythrobasidiales	Erythrobasidiaceae	Erythrobasidium	Erythrobasidium hasegawianum	epiphytic on Pinus sylvestris	3.91667	0.0213931	0.00150615	MH931270
6	Basidiomycota	Tremellomycetes	Tremellales	Rhynchogastremataceae	Papiliotrema	Papiliotrema flavescens	F. excelsiorleaves (epiphytic)	3.91667	0.0429186	0.00359786	MH931267
7	Ascomycota	Dothideomycetes	Capnodiales	Mycosphaerellaceae	Septoria	Septoria sp.	F. excelsior leaves	11	0.0277554	0.00233145	MH931283
8	Ascomycota	Dothideomycetes	Dothideales	Dothioraceae	Aureobasidium	Aureobasidium pullulans	F. excelsior leaves	3.91667	0.0437736	0.00475643	MH931262
9	Ascomycota	Dothideomycetes	Pleosporales	Didymellaceae	Boeremia	Boeremia sp. 1	F. excelsior leaves	6	0.048171	0.00102126	MH931264
10	Ascomycota	Dothideomycetes	Pleosporales	Didymellaceae	Boeremia	Boeremia sp. 21	F. excelsior leaves	6	0.0718529	0.00170178	MH931265
11	Ascomycota	Dothideomycetes	Pleosporales	Didymellaceae	Epicoccum	Epicoccum nigrum	Epiphytic	3	0.0584401	0.00446429	MH931271
12	Ascomycota	Dothideomycetes	Venturiales	Venturiaceae	Venturia	Venturia fraxini	F. excelsior leaves	11	0.0239037	0.00119935	MH931284
13	Ascomycota	Eurotiomycetes	Eurotiales	Aspergillaceae	Penicillium	Penicillium sp.	F. excelsior leaves (epiphytic)	6	0.0504016	0.00439399	MH931281
14	Ascomycota	Leotiomycetes	Helotiales		Phialocephala	Phialocephala fortinii	Picea abies fine root (UAMH 11012)	13	0.0218068	0.00107751	MH931279
15	Ascomycota	Leotiomycetes	Helotiales	Helotiaceae	Hymenoscyphus	Hymenoscyphus fraxineus	F. excelsior necrosis, Vienna	25	0.0119474	0.000272944	MH931276
16	Ascomycota	Saccharomycetes	Saccharomycetales	Saccharomycetaceae	Saccharomyces	Saccharomyces cervisiae	commercial baker's yeast	3.91667	0.126332	0.00563848	MH931282
17	Ascomycota	Pezizomycetes	Pezizales	Sarcoscyphaceae	Pithya	Pithya vulgaris	Abies balsamea needle (endophytic)	13	0.0292563	0.00190202	MH931280
18	Ascomycota	Sordariomycetes	Diaporthales	Diaporthaceae	Diaporthe	Diaporthe eres	F. excelsior leaves	6	0.0187896	0.00160027	MH931269
19	Ascomycota	Sordariomycetes	Glomerellales	Glomerellaceae	Colletotrichum	Colletotrichum acutatum	F. excelsior leaves	4	0.0289923	0.00374151	MH931266
20	Ascomycota	Sordariomycetes	Hypocreales	Nectriaceae	Fusarium	Fusarium tricinctum	F. excelsior leaves	4	0.0315668	0.00163518	MH931273
21	Ascomycota	Sordariomycetes	Ophiostomatales	Ophiostomataceae	Ophiostoma	Ophiostoma minus	Pinus sylvestris wood (stem)	6	0.0667222	0.00393362	MH931278
22	Ascomycota	Sordariomycetes	Xylariales	Xylariaceae	Nemania	Nemania serpens	F. excelsior leaves	13	0.00763399	0.000119062	MH931277
23	Ascomycota	Sordariomycetes	Xylariales	Xylariaceae		Xylariaceae isolate	F. excelsior leaves	13	0.0428853	0.00245185	MH931285
24	(Zygomycota)		Mucorales	Backusellaceae	Backusella	Backusella tuberculispora	forest soil	4	0.0620539	0.00260052	MH931263
						1 Similar to sp. 1, ITS2 sequence differs by 1 substitution and 2 InDels
						2 Expected relative amount of each species in the even mock community as calculated from the qPCR results (N0)

## Sheet: dilution_uneven_1
species	group	conc. [ng/µl]	rel. abundance	rel. abund in group	mass to pipet	volume to pipet	Sub-pools
Erythrobasidium hasegawianum	1	0.69619	0.4	0.419576	88.1109	126.561						k
Hebeloma crustiliniforme	1	0.754286	0.24	0.251745	52.8665	70.0882			210			(dilution factor)
Coniophora puteana	1	0.671429	0.144	0.151047	31.7199	47.2424			292.896			0.6
Diaporthe eres	1	0.742857	0.0864	0.0906284	19.032	25.6199			↓
Fusarium tritinctum	1	0.76381	0.05184	0.054377	11.4192	14.9503			199.5
Boeremia sp. 2	1	0.812381	0.031104	0.0326262	6.8515	8.43386			278.251	Total:
Saccharomyces cervisiae	2	0.719048	0.0186624	0.419576	41.9576	58.3516			0.0466515	291.62
Septoria sp.	2	0.721905	0.0111974	0.251745	25.1745	34.8724		100	13.3682	209.262
Nemania serpens	2	0.762857	0.00671846	0.151047	15.1047	19.8002		136.912	9.7624	0.717587
Xylariaceae_isolate	2	0.76	0.00403108	0.0906284	9.06284	11.9248		↓
Colletotrichum acutatum	2	0.753333	0.00241865	0.054377	5.4377	7.21819		95	↑
Hymenoscyphus fraxineus	2	0.687619	0.00145119	0.0326262	3.26262	4.74481		130.066
Papiliotrema flavescens	3	0.731429	0.000870713	0.419576	41.9576	57.3639		0.0465592	136.442
Fomitopsis pinicola	3	0.71619	0.000522428	0.251745	25.1745	35.1506	100	6.37532	99.6391
Heterobasidion annosum	3	0.68	0.000313457	0.151047	15.1047	22.2128	137.684	4.63911
Epicoccum nigrum	3	0.76	0.000188074	0.0906284	9.06284	11.9248	↓
Phialocephala fortinii	3	0.780952	0.000112844	0.054377	5.4377	6.96291	95	↑
Venturia fraxini	3	0.801905	6.77066e-05	0.0326262	3.26262	4.06859	130.799
Boeremia sp. 1	4	0.739048	4.0624e-05	0.419576	41.9576	56.7725	0.0445763	136.645
Aureobasidium pullulans	4	0.74	2.43744e-05	0.251745	25.1745	34.0197	5.84578	99.4323
Backusella tuberculispora	4	0.744762	1.46246e-05	0.151047	15.1047	20.2813	4.43232
Pithya vulgaris	4	0.92	8.77478e-06	0.0906284	9.06284	9.85091	↑
Ophiostoma minus	4	0.804762	5.26487e-06	0.054377	5.4377	6.75691	131.89
Penicillium sp.	4	0.775238	3.15892e-06	0.0326262	3.26262	4.20854	100
		total:	1			combination of sub-pools:	4 + 5	(4+5) + 3	(4+5+3) + 2	(4+5+3+2) + 1
							* rel. abundance of lower (diluted) group in upper pool

## Sheet: dilution_uneven_2
species	group	conc. [ng/µl]	rel. abundance	rel. abund in group	mass to pipet	volume to pipet	Sub-pools
Penicillium sp.	1	0.775238	0.5	0.507937	106.667	137.592						k
Colletotrichum acutatum	1	0.753333	0.25	0.253968	53.3333	70.7965			210			(dilution factor)
Fomitopsis pinicola	1	0.71619	0.125	0.126984	26.6667	37.234			278.699			0.5
Coniophora puteana	1	0.671429	0.0625	0.0634921	13.3333	19.8582			↓
Papiliotrema flavescens	1	0.731429	0.03125	0.031746	6.66667	9.11458			199.5
Boeremia sp. 2	1	0.812381	0.015625	0.015873	3.33333	4.10317			264.764	Total:
Heterobasidion annosum	2	0.68	0.0078125	0.507937	50.7937	74.6965			0.0156249	269.16
Fusarium tritinctum	2	0.76381	0.00390625	0.253968	25.3968	33.2502		100	4.3967	202.667
Aureobasidium pullulans	2	0.74	0.00195312	0.126984	12.6984	17.16		138.954	3.16665	0.752959
Hebeloma crustiliniforme	2	0.754286	0.000976562	0.0634921	6.34921	8.41751		↓
Pithya vulgaris	2	0.92	0.000488281	0.031746	3.1746	3.45066		95	↑
Venturia fraxini	2	0.801905	0.000244141	0.015873	1.5873	1.97941		132.007
Xylariaceae_isolate	3	0.76	0.00012207	0.507937	50.7937	66.8338		0.0156212	133.995
Phialocephala fortinii	3	0.780952	6.10352e-05	0.253968	25.3968	32.5203	100	1.98804	96.5076
Boeremia sp. 1	3	0.739048	3.05176e-05	0.126984	12.6984	17.1821	131.756	1.50757
Backusella tuberculispora	3	0.744762	1.52588e-05	0.0634921	6.34921	8.52515	↓
Saccharomyces cervisiae	3	0.719048	7.62939e-06	0.031746	3.1746	4.41501	95	↑
Erythrobasidium hasegawianum	3	0.69619	3.8147e-06	0.015873	1.5873	2.27998	125.169
Hymenoscyphus fraxineus	4	0.687619	1.90735e-06	0.507937	50.7937	73.8689	0.0153846	127.235
Epicoccum nigrum	4	0.76	9.53674e-07	0.253968	25.3968	33.4169	2.06626	96.4844
Diaporthe eres	4	0.742857	4.76837e-07	0.126984	12.6984	17.094	1.48438
Septoria sp.	4	0.721905	2.38419e-07	0.0634921	6.34921	8.79507	↑
Ophiostoma minus	4	0.804762	1.19209e-07	0.031746	3.1746	3.94477	139.2
Nemania serpens	4	0.762857	5.96046e-08	0.015873	1.5873	2.08073	100
		total:	1			combination of sub-pools:	4 + 5	(4+5) + 3	(4+5+3) + 2	(4+5+3+2) + 1
							* rel. abundance of lower (diluted) group in upper pool

## Sheet: ITS_content_calc
	This worksheet calculates the number of ITS molecules given a hypothetical gnenome of 30 Mbp size with 60 rDNA repeats
	Formulas according to https://bitesizebio.com/20669/how-to-calculate-the-number-of-molecules-in-any-piece-of-dna
	Number of ITS units in the undiluted				Number of ITS molecules in 4.5µl at different dilutions of the communities
	communities (0.75ng/µl)				and different frequencies of single hypothetical species
	genome properties	Mbp	30		dil. factor	final conc. [pg/µl]	Frequency of single species
		bp	30000000				1	0.01	0.001
		# rDNA repeats	60		21.8	34.4037	286863	2868.63	286.863
	amount of gDNA in 1 ul	ng/µl	0.75		228	3.28947	27428.1	274.281	27.4281
		# genomes	23161.5		2393	0.313414	2613.3	26.133	2.6133
		# ITS units	1.38969e+06		15680	0.0478316	398.828	3.98828	0.398828
